# Supplementary material
Source: HighWire-hosted journal article supplement (doi:10.1101/rna.079931.123)
Supplement: Supplemetal_Dataset_S1.xlsx [file Supplemetal_Dataset_S1.xlsx]

## Sheet: READ ME
sheet name	description
PolyAminer_KD_Pval_sig	CPSF3 Knockdown polyAminer results that have significant p values. Further subsetting based on polyAindex is needed to sort out differential APA genes (DAGS)
PolyAminer_JTE_Pval_sig	CPSF3 Inhibition polyAminer results that have significant p values. Further subsetting based on polyAindex is needed to sort out differential APA genes (DAGS)

## Sheet: PolyAminer_KD_Pval_sig
Gene	Vector_a	Vector_b	CP	TP	CD	TD	PolyAIndex	No.PAsites	PolyASites	DeltaU	MaxPASite	MaxDeltaU	G_Pval	AdjG_Pval	Symbol
SOCS3	0.04368488205704086,0.27914738313077325,0.31123532652988534,0.3659324082823005	0.08708456006958964,0.2783512047915003,0.261046869526605,0.3735173656123051	0.48924	0.482671	0.34613	0.350844	0.0195013	4	chr17_78356752_78356804_-@UTR3,chr17_78356962_78357014_-@UTR3,chr17_78357124_78357176_-@UTR3,chr17_78358016_78358068_-@UTR3	0.04106353498180653,-0.0024814525038331925,-0.05166841822419599,0.006098595770052784	chr17_78357124_78357176_-@UTR3	-0.0516684	0.00233095	0.0245657	NA
TINF2	0.11107776443910898,0.8889222355608911	0.24777701517577977,0.7522229848242202	0.895833	0.776791	0.21846	0.337502	0.205704	2	chr14_24239376_24239428_-@UTR3-EX,chr14_24239748_24239800_-@UTR3	0.13432574119626303,-0.13466639196391228	chr14_24239748_24239800_-@UTR3	-0.134666	0.00171792	0.0212937	NA
PPP1CA	0.3991080827319268,0.6008919172680732	0.3629133517231227,0.6370866482768772	0.673634	0.701036	0.520867	0.493465	-0.0575241	2	chr11_67398340_67398392_-@UTR3,chr11_67398520_67398572_-@UTR3	-0.03617377878149031,0.03616129285776526	chr11_67398340_67398392_-@UTR3	-0.0361738	0.000819326	0.015526	NA
WDR59	0.7810743203459308,0.21892567965406928	0.6233730158730159,0.37662698412698414	0.219981	0.377469	0.781369	0.623881	-0.778981	2	chr16_74873652_74873704_-@UTR3,chr16_74912092_74912144_-@UTR3	-0.1531312133341317,0.1554381787167925	chr16_74912092_74912144_-@UTR3	0.155438	0.00814037	0.0485209	NA
SYNM	0.11421387125548343,0.13896856997054047,0.27102855482680294,0.13768479449325932,0.2336830810798786,0.10442112837403528	0.10771890081817723,0.19992139463508826,0.2437385142647357,0.14529595041569415,0.21216617055938794,0.09115906930691695	0.329503	0.348322	0.335186	0.314841	-0.080131	6	chr15_99133416_99133468_+@UTR3,chr15_99133662_99133714_+@UTR3,chr15_99134102_99134154_+@UTR3,chr15_99134432_99134484_+@UTR3,chr15_99135352_99135404_+@UTR3,chr15_99135556_99135608_+@UTR3	-0.005609695581837562,0.061609472688994416,-0.02649579840606786,0.008442584558661675,-0.020686586422865416,-0.012323612880208959	chr15_99133662_99133714_+@UTR3	0.0616095	0.00150317	0.0199114	NA
TENT4A	0.2024653759391785,0.243247664019141,0.21764333428515037,0.17784440978780117,0.15879921596872892	0.19754286547402755,0.20413276788184262,0.2813982320829101,0.18536373569682227,0.13156239886439738	0.385234	0.37692	0.336282	0.344192	0.031477	5	chr5_6755142_6755194_+@UTR3,chr5_6755410_6755462_+@UTR3,chr5_6756242_6756294_+@UTR3,chr5_6756692_6756744_+@UTR3,chr5_6756964_6757016_+@UTR3	-0.004662529831542028,-0.03869933290982658,0.0637368224510392,0.007799762402069754,-0.026855861035509493	chr5_6756242_6756294_+@UTR3	0.0637368	0.0063878	0.0427637	NA
ENTPD7	0.225518211986216,0.14906579675727552,0.09626324606845164,0.07653022909156863,0.07651886401679174,0.07228314492696124,0.11218438744549487,0.06101858464258995,0.08671941714464924,0.04389811792000122	0.18034007312453199,0.11985063513909884,0.07556527540959301,0.07707407323841972,0.06055057207107026,0.05950495357999702,0.13628646422581578,0.09555880744482087,0.12833709915003208,0.06693204661662053	0.32213	0.274054	0.202774	0.245264	0.233184	10	chr10_99705554_99705606_+@UTR3,chr10_99705924_99705976_+@UTR3,chr10_99706244_99706296_+@UTR3,chr10_99707756_99707808_+@UTR3,chr10_99708978_99709030_+@UTR3,chr10_99709182_99709234_+@UTR3,chr10_99709916_99709968_+@UTR3,chr10_99710436_99710488_+@UTR3,chr10_99710720_99710772_+@UTR3,chr10_99711086_99711138_+@UTR3	-0.044604132136542796,-0.028663755465640053,-0.020154722188150703,0.0010207896347080442,-0.015431185746360807,-0.012259061195331489,0.02444063512803725,0.034875657763370524,0.0419214764832785,0.02344410366963618	chr10_99705554_99705606_+@UTR3	-0.0446041	0.000212131	0.00781388	NA
C1orf115	0.5488888888888889,0.3212121212121212,0.12989898989898988	0.44748677248677254,0.4662257495590829,0.08628747795414461	0.631319	0.642172	0.207823	0.194239	-0.0245896	3	chr1_220696836_220696888_+@UTR3,chr1_220697300_220697352_+@UTR3,chr1_220699126_220699178_+@UTR3	-0.09599201255170442,0.14664769215475248,-0.036114460825629	chr1_220697300_220697352_+@UTR3	0.146648	0.00269047	0.0262457	NA
RIT1	0.1111752282998721,0.20647917287468495,0.22028823052855065,0.46205736829689226	0.10131938046048476,0.16032070633297626,0.3390340562841465,0.39932585692239253	0.536682	0.535389	0.290241	0.291315	0.00347774	4	chr1_155898832_155898884_-@UTR3,chr1_155899022_155899074_-@UTR3,chr1_155899660_155899712_-@UTR3,chr1_155900296_155900348_-@UTR3	-0.010365784458678945,-0.04636197702603756,0.11756663946418006,-0.06267833503294923	chr1_155899660_155899712_-@UTR3	0.117567	0.00116447	0.0177317	NA
KCMF1	0.4787750706389488,0.2158346267225372,0.09402187259461153,0.07682659072312346,0.06570684083984395,0.06883499848093501	0.4231975222644842,0.18772266364203563,0.15103091859168163,0.06692613891344434,0.09824319426208616,0.07287956232626795	0.505259	0.476354	0.171571	0.198823	0.0849892	6	chr2_85053368_85053420_+@UTR3,chr2_85053702_85053754_+@UTR3,chr2_85054136_85054188_+@UTR3,chr2_85054728_85054780_+@UTR3,chr2_85055210_85055262_+@UTR3,chr2_85055380_85055432_+@UTR3	-0.055337786641124265,-0.027899809252733,0.056956841517054435,-0.00971689469352019,0.03260187382454266,0.004197590395623341	chr2_85054136_85054188_+@UTR3	0.0569568	0.00101118	0.0169261	NA
PDHB	0.4727845030021574,0.5272154969978425	0.5288952745849298,0.47110472541507026	0.619145	0.576916	0.57818	0.620409	0.101917	2	chr3_58427824_58427876_-@UTR3,chr3_58428000_58428052_-@UTR3	0.05613136110877076,-0.05571008894051055	chr3_58427824_58427876_-@UTR3	0.0561314	0.00159811	0.0206244	NA
TRMT6	0.07374928119608971,0.5316113986326753,0.39463932017123504	0.07104155582945886,0.4152759465543443,0.5136824976161969	0.602967	0.652456	0.345778	0.296417	-0.113802	3	chr20_5937848_5937900_-@UTR3,chr20_5938142_5938194_-@UTR3,chr20_5938440_5938492_-@UTR3	-0.0032068205105161146,-0.11568766427947585,0.11771116620819361	chr20_5938440_5938492_-@UTR3	0.117711	0.00745231	0.0462451	NA
ABL2	0.06090510015866162,0.18906367209181069,0.1395900400111381,0.10911805434861829,0.11885130096934969,0.12747436465265435,0.13022823728604507,0.12476923048172212	0.08823903527501302,0.14273101871444885,0.1605603247353485,0.12014431146041134,0.09146920297714696,0.16593666882137,0.10517292062715056,0.12574651738911077	0.256912	0.251148	0.297634	0.302012	0.032737	8	chr1_179099464_179099516_-@UTR3,chr1_179099740_179099792_-@UTR3,chr1_179099914_179099966_-@UTR3,chr1_179100400_179100452_-@UTR3,chr1_179102564_179102616_-@UTR3,chr1_179104358_179104410_-@UTR3,chr1_179107122_179107174_-@UTR3,chr1_179107640_179107692_-@UTR3	0.027487868596000872,-0.045975863268088474,0.02111143295236234,0.011192048278732825,-0.027081223327872092,0.03854912532303059,-0.024769291838103308,0.001177717397556538	chr1_179099740_179099792_-@UTR3	-0.0459759	0.000134156	0.00627329	NA
MARCHF7	0.3704182684751507,0.11805621522252852,0.3698074614071176,0.05647568989102891,0.0852423650041743	0.3479416202621234,0.11185633076181413,0.4141399826304118,0.06843765211362475,0.057624414232026015	0.501989	0.505566	0.206854	0.203054	-0.0102438	5	chr2_159767382_159767434_+@UTR3,chr2_159768196_159768248_+@UTR3,chr2_159768490_159768542_+@UTR3,chr2_159770442_159770494_+@UTR3,chr2_159770994_159771046_+@UTR3	-0.02255463857016532,-0.006374143679669195,0.04409979455323798,0.011737035108514239,-0.02774643341181217	chr2_159768490_159768542_+@UTR3	0.0440998	0.0021952	0.0239236	NA
PPIL4	0.22815690057069368,0.22753730943386116,0.1840587573346194,0.2076434102296171,0.15260362243120865	0.2615717615717616,0.11117701742701742,0.29251998001998003,0.15446706071706073,0.18026418026418023	0.359476	0.358503	0.369757	0.370998	0.00390849	5	chr6_149501412_149501464_-@UTR3-EX,chr6_149502992_149503044_-@UTR3-EX,chr6_149503798_149503850_-@UTR3-EX,chr6_149504898_149504950_-@UTR3,chr6_149505194_149505246_-@UTR3	0.03309518739088965,-0.11528297286700533,0.10701851160805365,-0.05280082224926147,0.027056838721253	chr6_149502992_149503044_-@UTR3-EX	-0.115283	9.33e-05	0.00524153	NA
ACSL3	0.5075552008512901,0.07393367030238537,0.16746475126363392,0.15981348467381984,0.09123289290887054	0.5619146984905127,0.04711340465398206,0.150221783438187,0.14788607013242072,0.09286404328489761	0.470318	0.48581	0.237983	0.223281	-0.0467539	5	chr2_222941746_222941798_+@UTR3,chr2_222942086_222942138_+@UTR3,chr2_222943214_222943266_+@UTR3,chr2_222944314_222944366_+@UTR3,chr2_222944464_222944516_+@UTR3	0.054235496440216635,-0.026609699776048386,-0.017060918299752093,-0.011775683057899833,0.0017339046368778366	chr2_222941746_222941798_+@UTR3	0.0542355	0.00833975	0.0492636	NA
FAS	0.7288212582330229,0.24629671688495217,0.024882024882024883	0.5135710951871071,0.3240315185459737,0.16239738626691924	0.71294	0.604973	0.0947723	0.23528	0.236911	3	chr10_89014312_89014364_+@UTR3,chr10_89014494_89014546_+@UTR3,chr10_89015598_89015650_+@UTR3	-0.21753902421463378,0.05700817852636675,0.1108931844550877	chr10_89014312_89014364_+@UTR3	-0.217539	0.000748344	0.0149799	NA
B3GAT2	0.5365571119327317,0.24101806516627752,0.22242482290099078	0.4647289394657816,0.2679310889837206,0.2673399715504979	0.344355	0.391288	0.599047	0.553654	-0.184334	3	chr6_70860872_70860924_-@UTR3,chr6_70861144_70861196_-@UTR3,chr6_70861468_70861520_-@UTR3	-0.07118509102406467,0.027291382352553545,0.045207677110459615	chr6_70860872_70860924_-@UTR3	-0.0711851	0.00198276	0.022596	NA
RASSF4	0.8842592592592592,0.11574074074074074	0.7876501501501502,0.21234984984984984	0.891776	0.807708	0.223015	0.307084	0.142849	2	chr10_44994310_44994362_+@UTR3,chr10_44994680_44994732_+@UTR3	-0.09590555920327215,0.08298517122545887	chr10_44994310_44994362_+@UTR3	-0.0959056	0.00801334	0.0479623	NA
NADK	0.43738089672521646,0.5626191032747836	0.36535600266170215,0.6346439973382978	0.643013	0.698004	0.547393	0.492402	-0.118388	2	chr1_1752494_1752546_-@UTR3,chr1_1752680_1752732_-@UTR3	-0.07132943776421258,0.0719486639761533	chr1_1752680_1752732_-@UTR3	0.0719487	0.000403112	0.0107417	NA
THSD4	0.20045622158760779,0.14750160513872554,0.09799206318112513,0.12235985210572048,0.13937863070092296,0.07635139642726708,0.1288769179775344,0.08708331288109647	0.22507631876038012,0.16178646751865894,0.07773644558795038,0.12769675054270904,0.15385945736371173,0.06550358702186107,0.11669789776225938,0.0716430754424692	0.324366	0.338886	0.241439	0.226438	-0.0631771	8	chr15_71778352_71778404_+@UTR3,chr15_71778582_71778634_+@UTR3,chr15_71778908_71778960_+@UTR3,chr15_71780220_71780272_+@UTR3,chr15_71781232_71781284_+@UTR3,chr15_71782436_71782488_+@UTR3,chr15_71782718_71782770_+@UTR3,chr15_71783180_71783232_+@UTR3	0.02424442262440718,0.013902276570571998,-0.020611375644545932,0.0049554706799423975,0.014095120851332243,-0.011227048795476285,-0.012535010929630191,-0.015807439240887802	chr15_71778352_71778404_+@UTR3	0.0242444	0.00753493	0.0462907	NA
ACADM	0.875478175327573,0.06518599651129771,0.05933582816112937	0.8137413512413513,0.09064916564916564,0.0956094831094831	0.850603	0.803477	0.142412	0.182667	0.0822283	3	chr1_75762752_75762804_+@UTR3,chr1_75763178_75763230_+@UTR3,chr1_75763352_75763404_+@UTR3	-0.06132146099390123,0.025675689587374595,0.03636674881316751	chr1_75762752_75762804_+@UTR3	-0.0613215	0.00150544	0.0199114	NA
AMN1	0.4664790494058786,0.5335209505941213	0.6697167755991286,0.3302832244008715	0.574503	0.391	0.513971	0.697474	0.555146	2	chr12_31671562_31671614_-@UTR3,chr12_31672068_31672120_-@UTR3	0.19318200110626477,-0.20091553685522828	chr12_31672068_31672120_-@UTR3	-0.200916	0.00290571	0.0270008	NA
KIFAP3	0.18150871459694984,0.81849128540305	0.3403655429063777,0.6596344570936222	0.837377	0.707578	0.316911	0.44671	0.242988	2	chr1_169921302_169921354_-@UTR3,chr1_169921554_169921606_-@UTR3	0.14947026040580355,-0.15745657512377065	chr1_169921554_169921606_-@UTR3	-0.157457	0.000184878	0.00724323	NA
PNRC1	0.3521702313250242,0.6478297686749759	0.2958207597012035,0.7041792402987964	0.472381	0.428177	0.704316	0.74852	0.141744	2	chr6_89084408_89084460_+@UTR3,chr6_89084616_89084668_+@UTR3	-0.05601030417671682,0.05614989066043552	chr6_89084616_89084668_+@UTR3	0.0561499	0.00484567	0.0361332	NA
WASHC2C	0.8085775978167891,0.19142240218321094	0.7132900624279935,0.2867099375720065	0.826077	0.743344	0.290236	0.372969	0.152246	2	chr10_45792568_45792620_+@UTR3,chr10_45792932_45792984_+@UTR3	-0.09397826661731701,0.0956624998480036	chr10_45792932_45792984_+@UTR3	0.0956625	0.000757096	0.0149943	NA
NCOA7	0.29196042489189694,0.15981118899900632,0.09048760508151373,0.04745957886820831,0.33519827840893834,0.07508292375043644	0.34604749512036437,0.1255308862864165,0.07771949324080098,0.11828372370418562,0.24511358707438732,0.08730481457384513	0.334172	0.363625	0.307162	0.26908	-0.12186	6	chr6_125929088_125929140_+@UTR3,chr6_125929222_125929273_+@UTR3,chr6_125929336_125929388_+@UTR3,chr6_125929610_125929662_+@UTR3,chr6_125930884_125930936_+@UTR3,chr6_125931084_125931136_+@UTR3	0.055544649925563294,-0.03157380311453534,-0.010112177023712837,0.07279222843158531,-0.08740837624206554,0.014725825968786466	chr6_125930884_125930936_+@UTR3	-0.0874084	0.000264919	0.00865185	NA
AC013394.1	0.16440951983458785,0.22045200504679804,0.29025325139482566,0.32488522372378853	0.18969901376102524,0.3011406403798275,0.1792889815297319,0.3298713643294154	0.284185	0.354238	0.437115	0.36523	-0.317884	4	chr15_92902268_92902320_+@UTR3,chr15_92902650_92902702_+@UTR3,chr15_92946356_92946408_+@UTR3,chr15_92949080_92949132_+@UTR3	0.022540078506253364,0.07727204319681649,-0.11176554878148884,0.0026517459797999465	chr15_92946356_92946408_+@UTR3	-0.111766	0.00281328	0.0265945	NA
PRSS16	0.29332541097246984,0.7066745890275302	0.5619132501485443,0.43808674985145574	0.329699	0.583947	0.72098	0.466732	-0.824689	2	chr6_27255478_27255530_+@UTR3,chr6_27256424_27256476_+@UTR3	0.24833142639206712,-0.2583269768624458	chr6_27256424_27256476_+@UTR3	-0.258327	0.000516206	0.0121083	NA
CCS	0.7998721227621483,0.20012787723785164	0.5963948993967417,0.4036051006032583	0.824065	0.667875	0.3637	0.519889	0.303179	2	chr11_66605982_66606034_+@UTR3,chr11_66606172_66606224_+@UTR3-EX	-0.19806755990266633,0.19995226404800873	chr11_66606172_66606224_+@UTR3-EX	0.199952	0.00010571	0.00571976	NA
CENPA	0.7266939053455909,0.27330609465440925	0.6125847868217055,0.3874152131782946	0.755527	0.656839	0.363412	0.4621	0.201944	2	chr2_26794010_26794062_+@UTR3,chr2_26794364_26794416_+@UTR3	-0.11307371104028552,0.11394929291492711	chr2_26794364_26794416_+@UTR3	0.113949	7.61e-05	0.00459928	NA
LMAN1	0.18660572408326068,0.06835678612465192,0.17130554270225415,0.19857379169999556,0.22336180190133204,0.15179635348850554	0.21741142142701633,0.08051206560379885,0.17959423823826284,0.21014721749616627,0.18108357714322373,0.13125148009153192	0.344591	0.318461	0.349831	0.370888	0.11377	6	chr18_59328482_59328534_-@UTR3,chr18_59328906_59328958_-@UTR3,chr18_59329396_59329448_-@UTR3,chr18_59329618_59329670_-@UTR3,chr18_59329970_59330022_-@UTR3,chr18_59331060_59331112_-@UTR3	0.03037814413284054,0.011726138917651258,0.007897924934298695,0.011207682178042494,-0.04253528718824354,-0.020877432318546302	chr18_59329970_59330022_-@UTR3	-0.0425353	0.00274855	0.0264568	NA
BYSL	0.8180758105795588,0.13471042256649454,0.047213766853946765	0.7169988871432311,0.18001003753164002,0.10299107532512873	0.824405	0.74154	0.138527	0.207778	0.15283	3	chr6_41933006_41933058_+@UTR3,chr6_41934200_41934252_+@UTR3-EX,chr6_41934632_41934684_+@UTR3-EX	-0.09965643614521724,0.045383690495879675,0.05584129434341683	chr6_41933006_41933058_+@UTR3	-0.0996564	0.00677841	0.0440627	NA
VIL1	0.08837925534840235,0.36921620927973015,0.17389411354928597,0.14175786907184365,0.22675255275073783	0.052803835730665,0.2774650823431311,0.2558682509902022,0.1793621013133208,0.23450072962268087	0.352175	0.316326	0.388742	0.422559	0.154881	5	chr2_218450264_218450316_+@UTR3,chr2_218450812_218450864_+@UTR3,chr2_218451118_218451170_+@UTR3,chr2_218451706_218451758_+@UTR3,chr2_218452028_218452080_+@UTR3	-0.03489903931370432,-0.09059955399042458,0.0813788438548673,0.037466644609986,0.008046124588230286	chr2_218450812_218450864_+@UTR3	-0.0905996	0.00150481	0.0199114	NA
MDN1	0.278522087420909,0.721477912579091	0.3941496412084648,0.6058503587915353	0.74229	0.636765	0.338034	0.44356	0.221223	2	chr6_89642772_89642824_-@UTR3,chr6_89643338_89643390_-@UTR3	0.11774201500467557,-0.11205453255413744	chr6_89642772_89642824_-@UTR3	0.117742	0.00204192	0.0229235	NA
ERCC6L2	0.17748277868498605,0.1571855584961616,0.13392974454267323,0.19533992154212887,0.21639028098428967,0.1196717157497607	0.2835164835164835,0.09706959706959707,0.18876678876678876,0.20903540903540904,0.14774114774114774,0.07387057387057387	0.219377	0.321991	0.367323	0.318523	-0.553605	6	chr9_95967134_95967186_+@UTR3,chr9_96013800_96013852_+@UTR3,chr9_96014530_96014582_+@UTR3,chr9_96014696_96014748_+@UTR3,chr9_96016678_96016730_+@UTR3,chr9_96018210_96018262_+@UTR3	0.10535453053123339,-0.05722146386721351,0.055215384141203444,0.014917887827191861,-0.06596341211344572,-0.04329872326450322	chr9_95967134_95967186_+@UTR3	0.105355	0.00459538	0.0349917	NA
GTPBP10	0.3368763721704899,0.2451313498372322,0.23832462714815658,0.07886365356953592,0.06557044439397382,0.0352335528806117	0.31448474741157667,0.31944270724758533,0.16967201723299286,0.0719685914807866,0.056337294142172194,0.06809464248488639	0.412968	0.391972	0.282254	0.29292	0.075282	6	chr7_90355090_90355142_+@UTR3,chr7_90385086_90385138_+@UTR3,chr7_90385452_90385504_+@UTR3,chr7_90386768_90386820_+@UTR3,chr7_90390500_90390552_+@UTR3,chr7_90391124_90391176_+@UTR3	-0.022827767964631762,0.07307348419175563,-0.0688857647801075,-0.00769341529883702,-0.010038186837228874,0.03174337950527555	chr7_90385086_90385138_+@UTR3	0.0730735	0.00310064	0.028127	NA
ZNF7	0.8526395173453997,0.1473604826546003	0.6667829187010773,0.33321708129892275	0.854345	0.670729	0.15757	0.341185	0.349088	2	chr8_144843188_144843240_+@UTR3,chr8_144847474_144847526_+@UTR3	-0.17474658088262573,0.1930369108840357	chr8_144847474_144847526_+@UTR3	0.193037	0.00132769	0.018722	NA
DPP8	0.056467853248359824,0.05981550701792412,0.12253229281512212,0.095623611356073,0.13773881540688857,0.10351517542022849,0.1522011790799235,0.12712080231207692,0.14498476334340352	0.051546296716592215,0.0763820450702931,0.14039158690851053,0.1256505900674547,0.11350342148900198,0.07423988081528442,0.13281826068098024,0.13543031577673206,0.15003760247515072	0.334379	0.328759	0.225607	0.232434	0.0244557	9	chr15_65442648_65442700_-@UTR3,chr15_65443348_65443400_-@UTR3,chr15_65444542_65444594_-@UTR3,chr15_65444692_65444744_-@UTR3,chr15_65445036_65445088_-@UTR3,chr15_65445546_65445598_-@UTR3,chr15_65445754_65445806_-@UTR3,chr15_65446324_65446376_-@UTR3,chr15_65446712_65446764_-@UTR3	-0.005283013764679427,0.01613969842167748,0.01746002410326339,0.029574760913909287,-0.02452577248942145,-0.029575485256450026,-0.019673926098772554,0.00792500595349338,0.00468647017757895	chr15_65445546_65445598_-@UTR3	-0.0295755	0.00307841	0.0280925	NA
PGGT1B	0.029776111243076525,0.03952458515728392,0.026587261189724792,0.06965511780741344,0.1703258791724637,0.20065058950837225,0.13646638086727672,0.07461890272640552,0.25239517232798303	0.062126694649491,0.07054506199642978,0.07974622473102716,0.0475177304964539,0.14726504076808028,0.15692454286679208,0.15746791624451198,0.042450065132435946,0.2359567231147778	0.37345	0.337429	0.116714	0.167542	0.146331	9	chr5_115205374_115205426_-@UTR3,chr5_115205530_115205582_-@UTR3,chr5_115208094_115208146_-@UTR3,chr5_115210490_115210542_-@UTR3,chr5_115211050_115211102_-@UTR3,chr5_115211222_115211274_-@UTR3,chr5_115211398_115211450_-@UTR3,chr5_115211882_115211934_-@UTR3,chr5_115212172_115212224_-@UTR3	0.031734723431762334,0.030453262271256852,0.05245204797382012,-0.022362797697759826,-0.023206090385583772,-0.04376367462413211,0.020586180327618997,-0.03228246531111472,-0.01667280488112169	chr5_115208094_115208146_-@UTR3	0.052452	3.33e-05	0.00322193	NA
EPM2A	0.6997442455242967,0.3002557544757033	0.5000000000000001,0.5	0.340381	0.52819	0.715999	0.52819	-0.633905	2	chr6_145625922_145625974_-@UTR3,chr6_145626764_145626816_-@UTR3	-0.1819226174064884,0.20144058450510066	chr6_145626764_145626816_-@UTR3	0.201441	0.00318903	0.0286065	NA
KLHDC10	0.1617990342580377,0.21207087014274462,0.10898742305954522,0.15556528360607927,0.14900198508364956,0.13653624151957858,0.07603916233036499	0.20245371769137344,0.1698501084157845,0.14192213809343712,0.14127262418484823,0.12390802054672968,0.12523920623973514,0.09535418482809188	0.354409	0.357111	0.278503	0.275956	-0.0109603	7	chr7_130130860_130130912_+@UTR3,chr7_130131488_130131540_+@UTR3,chr7_130133058_130133110_+@UTR3,chr7_130133542_130133594_+@UTR3,chr7_130133720_130133772_+@UTR3,chr7_130135058_130135110_+@UTR3,chr7_130135598_130135650_+@UTR3	0.04042798936455888,-0.04222848253745615,0.03273375497046342,-0.014372059435506013,-0.025156720309262193,-0.011397827230995888,0.01913702287071463	chr7_130131488_130131540_+@UTR3	-0.0422285	6.63e-05	0.00429005	NA
SLC66A1	0.6678383511716844,0.21775108441775107,0.08795462128795462,0.02645594312260979	0.6159649593474482,0.24633514972394974,0.05603231533362068,0.08166757559498156	0.59886	0.566986	0.0767845	0.125009	0.0789061	4	chr1_19328958_19329010_+@UTR3,chr1_19329260_19329312_+@UTR3,chr1_19329730_19329782_+@UTR3-EX,chr1_19332394_19332446_+@UTR3-EX	-0.05122703359778602,0.029163376465792507,-0.03074479601695826,0.05571764806994824	chr1_19332394_19332446_+@UTR3-EX	0.0557176	0.00645394	0.0430139	NA
AGPAT3	0.29872845927396097,0.17899934008540655,0.12535306261874724,0.12125947276647168,0.07286782758443001,0.08300287736060759,0.06655691638699253,0.05323204392338341	0.24309608068308766,0.19075067029640236,0.1485947725720592,0.14186837232996716,0.06955509834371722,0.12194738116706612,0.04748732902353613,0.03670029558416419	0.392995	0.390784	0.179124	0.181504	0.00813723	8	chr21_43982526_43982578_+@UTR3,chr21_43982694_43982746_+@UTR3,chr21_43983328_43983380_+@UTR3,chr21_43984488_43984540_+@UTR3,chr21_43984646_43984698_+@UTR3,chr21_43985350_43985402_+@UTR3,chr21_43986514_43986566_+@UTR3,chr21_43986800_43986852_+@UTR3	-0.05572249793793621,0.01144623965908037,0.02288791299483625,0.0202624249818721,-0.003611599484881531,0.038537988539391346,-0.019328972900464904,-0.016801996970401356	chr21_43982526_43982578_+@UTR3	-0.0557225	0.000221403	0.00794419	NA
CBFB	0.3316668210734359,0.03665439132851585,0.1998522841908056,0.08343336318530871,0.14271845984394624,0.15110591274988164,0.054568767628106155	0.31327904234784587,0.06848523126500468,0.20111680097864124,0.10300378752989969,0.1492006473769391,0.13171154165904095,0.0332029488426283	0.388166	0.397897	0.257632	0.247721	-0.035719	7	chr16_67098832_67098884_+@UTR3,chr16_67099114_67099166_+@UTR3,chr16_67099760_67099812_+@UTR3,chr16_67099990_67100042_+@UTR3,chr16_67100134_67100186_+@UTR3,chr16_67100364_67100416_+@UTR3,chr16_67100952_67101004_+@UTR3	-0.01820811567159708,0.03197110612029391,0.0014351949364082572,0.019742591075277913,0.006656316773287013,-0.019169863262339187,-0.021114356503673597	chr16_67099114_67099166_+@UTR3	0.0319711	0.00101853	0.0169531	NA
LSM8	0.11115208128482464,0.313897595050803,0.07104637823664373,0.08538747541789578,0.06665744837758113,0.1248110250737463,0.08956489675516226,0.07713352179613242,0.06034957800721075	0.07679387795666864,0.24986210494931418,0.1066289008149473,0.10636180679785329,0.09828811369509043,0.13457935798052076,0.13428493341284037,0.04786945935201748,0.045331445040747355	0.315981	0.298895	0.276766	0.288066	0.0801974	9	chr7_118188410_118188462_+@UTR3,chr7_118192070_118192122_+@UTR3,chr7_118193208_118193260_+@UTR3,chr7_118193348_118193400_+@UTR3,chr7_118193624_118193676_+@UTR3,chr7_118193834_118193886_+@UTR3,chr7_118194084_118194136_+@UTR3,chr7_118195566_118195618_+@UTR3,chr7_118196240_118196292_+@UTR3	-0.03629466201594682,-0.06533044541557226,0.033092519476569035,0.018607921831480204,0.029183907533788397,0.007660710183668901,0.042225175798369624,-0.03129267011597183,-0.01715902855623829	chr7_118192070_118192122_+@UTR3	-0.0653304	0.00277534	0.0265112	NA
SUN1	0.19206180010764295,0.20972426306677738,0.3121386593633454,0.16429469276675288,0.1217805846954813	0.19126067084719248,0.2185064849412474,0.3253642178280838,0.1679446625622167,0.09692396382125956	0.439534	0.451907	0.13843	0.114147	-0.0400525	5	chr7_873432_873484_+@UTR3,chr7_873616_873668_+@UTR3,chr7_873860_873912_+@UTR3,chr7_874384_874436_+@UTR3,chr7_895616_895668_+@UTR3	-0.0008168779543257232,0.008759448602569747,0.01320272788768323,0.003630892171295197,-0.02485288963876922	chr7_895616_895668_+@UTR3	-0.0248529	0.00570013	0.0400335	NA
COG5	0.22741642005188514,0.17199643515833032,0.21446672311740134,0.1004253172337616,0.099181686594284,0.1865134178443376	0.17240874213541,0.19444336442178556,0.2743032548822874,0.09476375314354095,0.09178959574571875,0.17229128967125729	0.29798	0.297901	0.379573	0.379641	0.000380311	6	chr7_107201530_107201582_-@UTR3,chr7_107201718_107201770_-@UTR3,chr7_107202148_107202200_-@UTR3,chr7_107202532_107202584_-@UTR3,chr7_107202824_107202876_-@UTR3,chr7_107203370_107203422_-@UTR3	-0.05487019374228866,0.022298165726219787,0.05957195189000916,-0.005725169938252131,-0.007449315518302579,-0.014239454618458908	chr7_107202148_107202200_-@UTR3	0.059572	0.00636881	0.0427418	NA
CDK1	0.3456907088643459,0.6199658206794693,0.034343470456184945	0.27336608589745925,0.6500723553046022,0.07656155879793855	0.579354	0.528464	0.345154	0.394276	0.132638	3	chr10_60793982_60794034_+@UTR3,chr10_60794696_60794748_+@UTR3,chr10_60795292_60795344_+@UTR3-EX	-0.07331717577422592,0.029227080968479813,0.04004716251848451	chr10_60793982_60794034_+@UTR3	-0.0733172	0.0035093	0.0301725	NA
SPIN2B	0.12980769230769232,0.1671474358974359,0.7030448717948717	0.3041652623300753,0.2894759015840917,0.40635883608583306	0.722394	0.471868	0.205402	0.417312	0.614402	3	chrX_57108012_57108064_-@UTR3-EX,chrX_57111340_57111392_-@UTR3-EX,chrX_57119702_57119754_-@UTR3	0.1544660894660895,0.10681818181818181,-0.2912554112554112	chrX_57119702_57119754_-@UTR3	-0.291255	0.00251919	0.0253835	NA
TEAD3	0.2511904761904762,0.13611111111111113,0.6126984126984126	0.3333090595738742,0.23878097179995994,0.42790996862616587	0.599412	0.495295	0.295285	0.407327	0.27526	3	chr6_35471100_35471152_-@UTR3-EX,chr6_35472644_35472696_-@UTR3-EX,chr6_35473704_35473756_-@UTR3	0.06723312529764147,0.0840241120886282,-0.1881938491615911	chr6_35473704_35473756_-@UTR3	-0.188194	0.00451398	0.0346144	NA
CENPF	0.7051571038251366,0.15885701275045536,0.03666894353369763,0.0773224043715847,0.021994535519125682	0.6793182923285515,0.11115042381632526,0.07638712253462238,0.06747726928514648,0.06566689203535464	0.598153	0.564344	0.0896165	0.130159	0.0839394	5	chr1_214664018_214664070_+@UTR3,chr1_214664494_214664546_+@UTR3,chr1_214665994_214666046_+@UTR3-EX,chr1_214666374_214666426_+@UTR3-EX,chr1_214668180_214668232_+@UTR3-EX	-0.02579075073072601,-0.04792388960105998,0.03878753543479137,-0.010391495965376779,0.04273691143329639	chr1_214664494_214664546_+@UTR3	-0.0479239	0.000972822	0.0166973	NA
FGD1	0.3002988912100273,0.6997011087899727	0.4145672911159637,0.5854327088840363	0.724015	0.620562	0.362414	0.465867	0.222446	2	chrX_54445434_54445486_-@UTR3,chrX_54445954_54446006_-@UTR3	0.114234017019881,-0.11285910646573782	chrX_54445434_54445486_-@UTR3	0.114234	0.000574232	0.0128458	NA
KCTD2	0.30608431054710294,0.24202688653698212,0.3628368409988682,0.0890519619170468	0.2903621038336064,0.31616255554079387,0.30343588478303507,0.09003945584256466	0.495458	0.50769	0.287352	0.272322	-0.0351833	4	chr17_75063602_75063654_+@UTR3,chr17_75063950_75064002_+@UTR3,chr17_75064724_75064776_+@UTR3,chr17_75065804_75065856_+@UTR3	-0.015542191220861645,0.07391143683050036,-0.0590175583754286,0.0011207771669139305	chr17_75063950_75064002_+@UTR3	0.0739114	0.00123212	0.0179478	NA
TRMT2B	0.047623183370968686,0.07289676336054658,0.11279022639106016,0.1597475537027387,0.2453824329801401,0.10401829656649875,0.25754154362804704	0.09389066356904313,0.10430733023570979,0.08338664936353518,0.21026518864043367,0.15252468418759985,0.11147890348966655,0.24414658051401195	0.40565	0.376583	0.149573	0.19809	0.107269	7	chrX_100997386_100997438_-@UTR3-EX,chrX_101001928_101001980_-@UTR3-EX,chrX_101007066_101007118_-@UTR3-EX,chrX_101007282_101007334_-@UTR3-EX,chrX_101008006_101008058_-@UTR3-EX,chrX_101008252_101008304_-@UTR3-EX,chrX_101009330_101009382_-@UTR3	0.04693894971762438,0.032239345575327094,-0.028088205285484613,0.050779468061800614,-0.09088217805940488,0.008484101426212531,-0.012388655046334907	chrX_101008006_101008058_-@UTR3-EX	-0.0908822	0.00436056	0.0339477	NA
NMBR	0.12107102313041011,0.15905704555129843,0.1721831985241947,0.15700830140485314,0.19861288491556692,0.07708954164892862,0.11497800482474811	0.10508298286076065,0.1624836069280514,0.10165513498846834,0.19691584136028578,0.16879663546330215,0.16017727128838244,0.10488852711074936	0.232665	0.257429	0.352979	0.336426	-0.145923	7	chr6_141736378_141736430_-@UTR3-EX,chr6_141752464_141752516_-@UTR3-EX,chr6_141753036_141753088_-@UTR3-EX,chr6_141763552_141763604_-@UTR3-EX,chr6_141846654_141846706_-@UTR3-EX,chr6_141894128_141894180_-@UTR3-EX,chr6_141965732_141965784_-@UTR3-EX	-0.019547823058111383,1.4247868014960474e-05,-0.07295181205714883,0.03599843540550923,-0.032778465883702645,0.0782876623077524,-0.013828731678382208	chr6_141894128_141894180_-@UTR3-EX	0.0782877	0.0070566	0.044944	NA
SLC38A1	0.08330482294689127,0.06851015787776862,0.09554678590504237,0.12032922880006157,0.09513891896313618,0.13304549271240837,0.1339019772013146,0.06763556869198677,0.20258704690139012	0.07574177586961324,0.07406992725962543,0.11675886242486393,0.12435356936791209,0.12677641132367998,0.11429659948617293,0.12462694417358922,0.064626948372895,0.17874896172164814	0.310999	0.299378	0.235416	0.246947	0.0549392	9	chr12_46183196_46183248_-@UTR3,chr12_46183420_46183472_-@UTR3,chr12_46183952_46184004_-@UTR3,chr12_46184742_46184794_-@UTR3,chr12_46186368_46186420_-@UTR3,chr12_46186670_46186722_-@UTR3,chr12_46186834_46186886_-@UTR3,chr12_46187824_46187876_-@UTR3,chr12_46188216_46188268_-@UTR3	-0.007601316159696628,0.005513007337254239,0.021157105242061353,0.00398132838838014,0.03157616166741109,-0.01877879756727674,-0.009310307155125541,-0.0030508510476069117,-0.02386242851681139	chr12_46186368_46186420_-@UTR3	0.0315762	9.59e-06	0.0015796	NA
WBP1L	0.22758208132269575,0.2846472750016001,0.261231208082704,0.22653943559300016	0.24722751541124288,0.305332402863351,0.21237695254888336,0.23506312917652275	0.437642	0.444388	0.335806	0.326573	-0.0220678	4	chr10_102813406_102813458_+@UTR3,chr10_102813592_102813644_+@UTR3,chr10_102814534_102814586_+@UTR3,chr10_102816136_102816188_+@UTR3	0.01960373104316948,0.02064731271794895,-0.048829360020609475,0.008489742521680832	chr10_102814534_102814586_+@UTR3	-0.0488294	0.00119827	0.0179193	NA
ENTPD5	0.06700777622637104,0.18426293785256517,0.061996892388350704,0.0904048291933165,0.06893184046420649,0.0757858195026222,0.14007003721776792,0.16099863412231163,0.15054123303248837	0.05667480667480667,0.2688034188034188,0.08809523809523809,0.056695156695156686,0.13005698005698005,0.06825396825396825,0.1436100936100936,0.11019536019536019,0.07761497761497761	0.301845	0.267794	0.228876	0.278695	0.172685	9	chr14_73958326_73958378_-@UTR3,chr14_73959066_73959118_-@UTR3,chr14_73963046_73963098_-@UTR3,chr14_73963496_73963548_-@UTR3,chr14_73964818_73964870_-@UTR3,chr14_73965136_73965188_-@UTR3,chr14_73966084_73966136_-@UTR3,chr14_73966270_73966322_-@UTR3,chr14_73966610_73966662_-@UTR3	-0.009034227427778471,0.08508183747000483,0.027135389647548414,-0.03234526744923391,0.061930476008818056,-0.006265547387771381,0.004635527917367072,-0.0493599082861432,-0.07130042019510202	chr14_73959066_73959118_-@UTR3	0.0850818	7.42e-05	0.00456015	NA
POLR2J3	0.04863564642097448,0.3070435219433541,0.6443208316356714	0.09442409442409443,0.3620028594387568,0.5435730461371487	0.688098	0.598559	0.233545	0.303719	0.201122	3	chr7_102531684_102531736_-@UTR3-EX,chr7_102537892_102537944_-@UTR3,chr7_102566940_102566992_-@UTR3	0.04616558370001865,0.055085728870178596,-0.09975973264214577	chr7_102566940_102566992_-@UTR3	-0.0997597	0.00339602	0.0297355	NA
SPRYD7	0.24089334271950527,0.7591066572804946	0.13149184149184148,0.8685081585081584	0.781741	0.877861	0.32644	0.23032	-0.167302	2	chr13_49914644_49914696_-@UTR3,chr13_49915042_49915094_-@UTR3	-0.10303414813218734,0.10754866048983702	chr13_49915042_49915094_-@UTR3	0.107549	0.00418958	0.0332834	NA
TCP11L1	0.36278974592001767,0.31981825318282675,0.1778089451941373,0.13958305570301818	0.28932136265075353,0.2988907406411842,0.15200795656147517,0.25977994014658706	0.498132	0.428611	0.146393	0.265702	0.21686	4	chr11_33072588_33072640_+@UTR3,chr11_33072764_33072816_+@UTR3,chr11_33073306_33073358_+@UTR3,chr11_33105912_33105964_+@UTR3	-0.07258939214736426,-0.02026412244875253,-0.02497924459230516,0.12030123620298072	chr11_33105912_33105964_+@UTR3	0.120301	2.81e-05	0.00298458	NA
FAM162A	0.9679644731732372,0.032035526826762875	0.8356607974094312,0.1643392025905687	0.968484	0.841271	0.0685666	0.19578	0.203158	2	chr3_122409888_122409940_+@UTR3,chr3_122411212_122411264_+@UTR3	-0.12999226517857487,0.13111354789357121	chr3_122411212_122411264_+@UTR3	0.131114	1.72e-05	0.00240292	NA
PLAC8	0.06451749238909764,0.06582288898948568,0.1303944754876392,0.23375376066628042,0.1761377634145419,0.32937361905295515	0.05897260214566444,0.07095562502246093,0.12893478674406617,0.22052940098389615,0.20852812575273807,0.31207945935117426	0.460119	0.45671	0.242814	0.245647	0.0107306	6	chr4_83086536_83086588_-@UTR3-EX,chr4_83086998_83087050_-@UTR3-EX,chr4_83087970_83088022_-@UTR3-EX,chr4_83088862_83088914_-@UTR3-EX,chr4_83089152_83089204_-@UTR3-EX,chr4_83090824_83090876_-@UTR3	-0.005379296758563738,0.005287280530432939,-0.0013089959428133069,-0.01307859233729683,0.03249968167201772,-0.017164326308159117	chr4_83089152_83089204_-@UTR3-EX	0.0324997	0.00482115	0.0360616	NA
PAPOLA	0.16854364974091876,0.22383848531029837,0.11734754269234667,0.10868174789611457,0.22153534319375814,0.1600532311665636	0.16225708957535104,0.24119798680752558,0.13587929297380755,0.1085264996853028,0.20101078479437806,0.15112834616363496	0.200163	0.19625	0.371844	0.373673	0.0284845	6	chr14_96542196_96542248_+@UTR3,chr14_96565014_96565066_+@UTR3,chr14_96565280_96565332_+@UTR3,chr14_96566126_96566178_+@UTR3,chr14_96566648_96566700_+@UTR3,chr14_96566928_96566980_+@UTR3	-0.006288108519899471,0.017336312567632794,0.018508346792472638,-0.00016346240901847497,-0.02051232036224912,-0.008925163742694114	chr14_96566648_96566700_+@UTR3	-0.0205123	0.00329243	0.0291019	NA
SMAP1	0.3713533433726488,0.2917425516875537,0.22455619232905435,0.11234791261074313	0.38908401307416407,0.22004427957113656,0.23264985633846272,0.15822185101623665	0.524525	0.501804	0.276903	0.303451	0.0638868	4	chr6_70860338_70860390_+@UTR3,chr6_70860740_70860791_+@UTR3,chr6_70861136_70861188_+@UTR3,chr6_70861924_70861976_+@UTR3	0.017619302933168934,-0.07150813103740974,0.008003720433838013,0.04563738148463252	chr6_70860740_70860791_+@UTR3	-0.0715081	0.0071918	0.0453665	NA
GEMIN5	0.0412349555206698,0.037781266352694916,0.08100470957613815,0.2508634222919937,0.5891156462585033	0.0913571225591686,0.13241586489668333,0.15640807047456662,0.18409450736816466,0.4357244347014168	0.547838	0.463471	0.0721854	0.175875	0.241271	5	chr5_154879662_154879714_-@UTR3-EX,chr5_154880488_154880540_-@UTR3-EX,chr5_154886962_154887014_-@UTR3-EX,chr5_154887548_154887600_-@UTR3,chr5_154887810_154887862_-@UTR3	0.04829972562113542,0.09226306405573317,0.0732139313380159,-0.06675448331351283,-0.1523415027255976	chr5_154887810_154887862_-@UTR3	-0.152342	1.91e-05	0.0024733	NA
SULT4A1	0.21146021643534083,0.48115030453338914,0.30738947903127006	0.21642857142857141,0.3023809523809524,0.48119047619047617	0.497481	0.573433	0.427096	0.352566	-0.204986	3	chr22_43824526_43824578_-@UTR3,chr22_43825078_43825130_-@UTR3,chr22_43825686_43825738_-@UTR3	0.00945502496586087,-0.17146959794018624,0.17448687077170044	chr22_43825686_43825738_-@UTR3	0.174487	0.00319585	0.0286322	NA
YWHAG	0.07080305659405757,0.10703831759048898,0.147529408976781,0.09655648578760123,0.12704077626480265,0.16201206368495258,0.15806005951501825,0.13095983158629773	0.07184585008425974,0.11287913306909854,0.1429981092050556,0.11289890457454582,0.13499633934277316,0.14733940197797293,0.15353263158525457,0.12350963016103968	0.331214	0.325202	0.253522	0.260055	0.0264241	8	chr7_76327376_76327428_-@UTR3,chr7_76327526_76327578_-@UTR3,chr7_76328044_76328096_-@UTR3,chr7_76328306_76328358_-@UTR3,chr7_76328714_76328766_-@UTR3,chr7_76328936_76328988_-@UTR3,chr7_76329204_76329256_-@UTR3,chr7_76329366_76329418_-@UTR3	0.0010025679317871572,0.005800760375798408,-0.004566817040110249,0.016299437508250525,0.007915673474970325,-0.014704831374324656,-0.004562307295989998,-0.007485607124910129	chr7_76328306_76328358_-@UTR3	0.0162994	0.00246724	0.0251512	NA
ARL14EP	0.24060722535341406,0.2698272198096646,0.22583387230897167,0.123089469955958,0.14064221257199175	0.16881511087015758,0.35550648928562173,0.22768167653245416,0.09357823741070184,0.15441848590106474	0.406966	0.377182	0.354781	0.37748	0.109647	5	chr11_30336762_30336814_+@UTR3,chr11_30337478_30337530_+@UTR3,chr11_30337696_30337748_+@UTR3,chr11_30337842_30337894_+@UTR3,chr11_30338120_30338172_+@UTR3	-0.0718994423201619,0.08453740336797294,0.0012118032179850857,-0.03001685848061683,0.013021939847938924	chr11_30337478_30337530_+@UTR3	0.0845374	0.00263581	0.0259921	NA
SOBP	0.25205173592951685,0.13046794330235614,0.32415416180552764,0.29332615896259934	0.2750772722882256,0.27353182652371294,0.28047425866898484,0.1709166425190766	0.37127	0.447356	0.458974	0.387392	-0.268955	4	chr6_107658646_107658698_+@UTR3,chr6_107658950_107659002_+@UTR3,chr6_107659228_107659280_+@UTR3,chr6_107659452_107659504_+@UTR3	0.022230367968896048,0.1402260574267817,-0.04345364336405705,-0.12078527673751918	chr6_107658950_107659002_+@UTR3	0.140226	0.000118125	0.00602939	NA
RPS6KA3	0.1332527410313116,0.14192024266095424,0.08809824396929422,0.0728146694437088,0.11640533918861078,0.09400455978703688,0.11005484054301633,0.24344936337606704	0.14866357450238168,0.1489648624307381,0.08016583783563713,0.09718122127972516,0.1526771284715234,0.07194830804982393,0.10029283143589014,0.20010623599428048	0.284877	0.244367	0.287334	0.304069	0.221289	8	chrX_20152256_20152308_-@UTR3,chrX_20152710_20152762_-@UTR3,chrX_20153220_20153272_-@UTR3,chrX_20154308_20154360_-@UTR3,chrX_20154556_20154608_-@UTR3,chrX_20154842_20154894_-@UTR3,chrX_20155054_20155106_-@UTR3,chrX_20176434_20176486_-@UTR3	0.014999623799118789,0.00664363152883829,-0.00834148293991796,0.023915080635144415,0.03582657585802171,-0.022445701743405683,-0.010160955859656748,-0.04364369849368124	chrX_20176434_20176486_-@UTR3	-0.0436437	8.47e-06	0.00156962	NA
STK38L	0.24265612427001917,0.25832636216608107,0.14027233362811412,0.16224829106814215,0.1964968888676434	0.20519227361332626,0.3263246500088606,0.160889597731703,0.15386319333687756,0.1537302853092327	0.401099	0.423562	0.313598	0.289529	-0.0786161	5	chr12_27322520_27322572_+@UTR3,chr12_27322690_27322742_+@UTR3,chr12_27323240_27323292_+@UTR3,chr12_27323952_27324004_+@UTR3,chr12_27324230_27324282_+@UTR3	-0.03640557432468117,0.06847720115009315,0.0215132075646583,-0.007383915682799808,-0.04161102982197068	chr12_27322690_27322742_+@UTR3	0.0684772	0.00191978	0.0222989	NA
AKT3	0.08619158651510733,0.09403089478286213,0.15795880695618378,0.15740794714854753,0.19930632468668025,0.14068104537064022,0.16442339453997862	0.11730094799715052,0.14814510384130639,0.13352786454052276,0.11265000821962846,0.09166255685243029,0.1847224505452354,0.21199106800372625	0.364442	0.349048	0.233503	0.254019	0.0622637	7	chr1_243500232_243500284_-@UTR3,chr1_243501736_243501788_-@UTR3,chr1_243502060_243502112_-@UTR3,chr1_243504132_243504184_-@UTR3,chr1_243504452_243504504_-@UTR3,chr1_243505018_243505070_-@UTR3,chr1_243505204_243505256_-@UTR3	0.033316390507635935,0.055980618851905986,-0.021558886521106435,-0.04164617276915347,-0.10379439246036432,0.04605778364246313,0.0494917648838962	chr1_243504452_243504504_-@UTR3	-0.103794	0.00486382	0.0361861	NA
SPDL1	0.5372379745498707,0.4627620254501293	0.6298448610213315,0.3701551389786684	0.61506	0.688482	0.556012	0.48259	-0.162692	2	chr5_169604200_169604252_+@UTR3,chr5_169604418_169604470_+@UTR3	0.09294909785820782,-0.09034364737743494	chr5_169604200_169604252_+@UTR3	0.0929491	0.00472652	0.0356056	NA
PHLDA1	0.09324020129446997,0.06742342375377772,0.13556029294080676,0.0942999278787093,0.10623791941024299,0.15873222640490173,0.13251561071317872,0.21199039760391292	0.12416676603356629,0.08163033405994993,0.1613852176919739,0.10547725923690295,0.1071647441483085,0.13990042990678483,0.12343489301257836,0.15684035590993528	0.33954	0.299295	0.243808	0.280803	0.182012	8	chr12_76026188_76026240_-@UTR3,chr12_76026622_76026674_-@UTR3,chr12_76026766_76026818_-@UTR3,chr12_76027030_76027082_-@UTR3,chr12_76028494_76028546_-@UTR3,chr12_76029028_76029080_-@UTR3,chr12_76029268_76029320_-@UTR3,chr12_76029864_76029916_-@UTR3	0.030848725314978134,0.014129554930154914,0.025751564854048614,0.011102592706830366,0.0008544970784413741,-0.01889676934233342,-0.009149040597173322,-0.05520466604864113	chr12_76029864_76029916_-@UTR3	-0.0552047	5.83e-10	1.41e-06	NA
PUM2	0.11572421906987278,0.12252777346648171,0.08874319474985046,0.161653641614587,0.0792019771455644,0.11987651253539844,0.10087090782855951,0.05819120239173228,0.1532105711979535	0.0963012095820677,0.10629777287792455,0.11081180665527984,0.16954051823417837,0.07154751829896502,0.11661677411117329,0.09745312471998638,0.06816281076528677,0.16326846475513798	0.294456	0.303467	0.283589	0.272569	-0.0434873	9	chr2_20248880_20248932_-@UTR3,chr2_20249532_20249584_-@UTR3,chr2_20249880_20249932_-@UTR3,chr2_20250036_20250088_-@UTR3,chr2_20250306_20250358_-@UTR3,chr2_20250460_20250512_-@UTR3,chr2_20250816_20250868_-@UTR3,chr2_20250954_20251006_-@UTR3,chr2_20251262_20251314_-@UTR3	-0.019597482019306625,-0.016404264020250636,0.021845060153551366,0.00769051241371993,-0.007850304927588453,-0.003451895374070882,-0.0036103180442001725,0.009753210080586307,0.009857415019927346	chr2_20249880_20249932_-@UTR3	0.0218451	0.00233524	0.0245657	NA
BCAS4	0.6044483471337069,0.1379141839537559,0.04638091905568187,0.04757521936043436,0.1083079188660753,0.055373411630345676	0.5284707682462954,0.12242512206417433,0.12359579082139344,0.06381642329981115,0.10921512015663408,0.05247677541169174	0.497659	0.479962	0.13488	0.157817	0.0522359	6	chr20_50876696_50876748_+@UTR3,chr20_50877146_50877198_+@UTR3,chr20_50878786_50878838_+@UTR3,chr20_50879016_50879068_+@UTR3,chr20_50880358_50880410_+@UTR3,chr20_50882650_50882702_+@UTR3	-0.07550126039025562,-0.01558077213193007,0.07644748908184065,0.015903182136206458,0.0007617544657876063,-0.003059545083627456	chr20_50878786_50878838_+@UTR3	0.0764475	0.0029525	0.0273896	NA
COX20	0.49927414223480837,0.20428477333570172,0.21725159249661194,0.07918949193287789	0.4026098906191328,0.2146707425643731,0.23889382752533797,0.14382553929115605	0.546291	0.477423	0.256081	0.317287	0.194401	4	chr1_244843218_244843270_+@UTR3,chr1_244843762_244843814_+@UTR3,chr1_244844852_244844904_+@UTR3,chr1_244845030_244845082_+@UTR3	-0.09625102166671856,0.010524909275928696,0.021714582911488173,0.06462650598334424	chr1_244843218_244843270_+@UTR3	-0.096251	0.000345958	0.00981764	NA
TECPR2	0.41994795957060105,0.28971351612861046,0.27147059977248655,0.018867924528301886	0.2893322900365154,0.36631269096057834,0.22809262985319323,0.11626238914971311	0.570594	0.515337	0.163087	0.237146	0.146949	4	chr14_102499114_102499166_+@UTR3,chr14_102499268_102499320_+@UTR3,chr14_102500060_102500112_+@UTR3,chr14_102501250_102501302_+@UTR3	-0.12919603519865602,0.07382190000129668,-0.044307583393484146,0.09360002823845356	chr14_102499114_102499166_+@UTR3	-0.129196	0.0012195	0.0179478	NA
DCAF8	0.23828467722526422,0.7617153227747359	0.3200322658153984,0.6799677341846015	0.77233	0.694623	0.274776	0.352482	0.152986	2	chr1_160215698_160215750_-@UTR3,chr1_160216722_160216774_-@UTR3	0.08032046493802864,-0.08133206439655638	chr1_160216722_160216774_-@UTR3	-0.0813321	0.00183821	0.0220951	NA
MAP4K2	0.08642785696424106,0.03382616487455197,0.0672095107110111,0.07083541718763024,0.7417010502625656	0.09245127300682858,0.0832478349839461,0.07746715732826844,0.1848106882829105,0.5620230463980463	0.546968	0.514408	0.119822	0.164976	0.0885433	5	chr11_64780154_64780206_-@UTR3-EX,chr11_64785098_64785150_-@UTR3,chr11_64786808_64786860_-@UTR3,chr11_64787482_64787534_-@UTR3,chr11_64789144_64789196_-@UTR3	-0.00034061417942647665,0.04208731563677783,0.0037581729598090974,0.1060858343012562,-0.17900290780157468	chr11_64789144_64789196_-@UTR3	-0.179003	0.00489038	0.0363171	NA
CREBL2	0.18172423025435078,0.15780455153949127,0.06685943775100402,0.16576706827309237,0.18848192771084338,0.1618366800535475,0.07752610441767067	0.20359363523561141,0.1468507742750926,0.0659552757050312,0.21929968181071502,0.13659238625244494,0.15272032230929153,0.07498792441181336	0.325923	0.341343	0.297077	0.281296	-0.0666911	7	chr12_12642134_12642186_+@UTR3,chr12_12642284_12642336_+@UTR3,chr12_12642576_12642628_+@UTR3,chr12_12642930_12642982_+@UTR3,chr12_12643450_12643502_+@UTR3,chr12_12643592_12643644_+@UTR3,chr12_12643842_12643894_+@UTR3	0.021199252082435782,-0.011549106746897686,-0.0015981901902844958,0.052742307188581805,-0.05233472295622202,-0.009716714299071422,-0.0032172414703930396	chr12_12642930_12642982_+@UTR3	0.0527423	0.00409822	0.0329677	NA
STARD7	0.07890507539016639,0.3622581398636646,0.20333054679640453,0.35550623794976444	0.10189089176157233,0.3058995671501473,0.23174251636394583,0.3604670247243346	0.491544	0.49265	0.344244	0.343321	-0.00324439	4	chr2_96184832_96184884_-@UTR3,chr2_96185320_96185372_-@UTR3,chr2_96185578_96185630_-@UTR3,chr2_96186554_96186606_-@UTR3	0.023101923765686677,-0.05616384124556467,0.02850523645493719,0.005042345436467088	chr2_96185320_96185372_-@UTR3	-0.0561638	0.00375976	0.0314311	NA
SPATA24	0.8676219205630971,0.13237807943690297	0.6157679418548984,0.3842320581451016	0.141024	0.390354	0.868899	0.619569	-1.46884	2	chr5_139396312_139396364_-@UTR3-EX,chr5_139401474_139401526_-@UTR3	-0.2409774436090225,0.24745196324143684	chr5_139401474_139401526_-@UTR3	0.247452	2.33e-05	0.00272646	NA
GTF3C6	0.9003849297701265,0.09961507022987355	0.8130952380952382,0.1869047619047619	0.901977	0.816214	0.115215	0.200978	0.144143	2	chr6_110967842_110967894_+@UTR3,chr6_110970788_110970840_+@UTR3-EX	-0.08561928559248899,0.08923091059446096	chr6_110970788_110970840_+@UTR3-EX	0.0892309	0.00120861	0.0179193	NA
RBM4B	0.099658772331998,0.21875285409772707,0.2706682227122066,0.13578205523278394,0.1453779730730328,0.1297601225522518	0.11257567894827884,0.31196182010919943,0.22119587153318343,0.10227757596724903,0.09174971946118808,0.16023933398090118	0.296255	0.257438	0.327066	0.370409	0.202613	6	chr11_66664972_66665024_-@UTR3,chr11_66665430_66665482_-@UTR3,chr11_66669266_66669318_-@UTR3,chr11_66675570_66675622_-@UTR3,chr11_66676150_66676202_-@UTR3,chr11_66676568_66676620_-@UTR3	0.013809172103950898,0.09351784532857782,-0.04837581263225013,-0.032222561549273915,-0.05230388908560009,0.031277491708274346	chr11_66665430_66665482_-@UTR3	0.0935178	0.00276258	0.0265112	NA
CRKL	0.15005240663035532,0.09804238798465593,0.14139745628771264,0.16728290064018916,0.12776611755774364,0.13155750889763115,0.10480797876854583,0.07909324323316642	0.1761437396813319,0.09776494580537302,0.11129922779921803,0.16674672290285233,0.12273389373939393,0.11629143482161387,0.11841066454553408,0.09060937070468282	0.323742	0.322573	0.266565	0.267809	0.00522103	8	chr22_20949826_20949878_+@UTR3,chr22_20950372_20950424_+@UTR3,chr22_20950808_20950860_+@UTR3,chr22_20951102_20951154_+@UTR3,chr22_20951420_20951472_+@UTR3,chr22_20952460_20952512_+@UTR3,chr22_20953078_20953130_+@UTR3,chr22_20953476_20953528_+@UTR3	0.0260254130768372,-0.00031054962542488573,-0.030096219495970494,-0.000567082913520367,-0.00505705014515892,-0.01528146110729986,0.013551528070797708,0.011466576303114137	chr22_20950808_20950860_+@UTR3	-0.0300962	0.00543748	0.0388667	NA
OXR1	0.28962827629822224,0.2644797351634538,0.15666320526133612,0.12583015170324566,0.10037034434476638,0.06302828722897587	0.3463518878412271,0.24233318924567182,0.15136555274018418,0.16880689559033182,0.04554400120893062,0.04559847337365445	0.299148	0.355478	0.316702	0.291265	-0.248904	6	chr8_106692700_106692752_+@UTR3,chr8_106750944_106750996_+@UTR3,chr8_106751432_106751484_+@UTR3,chr8_106751618_106751670_+@UTR3,chr8_106751962_106752014_+@UTR3,chr8_106752180_106752232_+@UTR3	0.05519262703876987,-0.023207622748847273,-0.006611624633877294,0.041185805427703226,-0.055911156334926736,-0.018808291173748208	chr8_106751962_106752014_+@UTR3	-0.0559112	0.00730287	0.0457846	NA
GRK3	0.19084635800774377,0.19372571091677981,0.13219932060176365,0.12130586459193966,0.10315796613251911,0.10372799112321968,0.1200695061013224,0.03496728252471186	0.13828369185512043,0.17851457795066816,0.18084303422649292,0.12478348380604021,0.10992490879708923,0.09668113333526868,0.08674558016663281,0.08422358986268762	0.371072	0.354209	0.177995	0.205969	0.0670975	8	chr22_25722642_25722694_+@UTR3,chr22_25722958_25723010_+@UTR3,chr22_25723416_25723468_+@UTR3,chr22_25723674_25723726_+@UTR3,chr22_25724630_25724682_+@UTR3,chr22_25724816_25724868_+@UTR3,chr22_25726170_25726222_+@UTR3,chr22_25728830_25728882_+@UTR3	-0.0516936897328269,-0.014587652126098971,0.04887853964985572,0.003992790344395869,0.007330908879588122,-0.006398664774384458,-0.032547217431596415,0.04956840398169673	chr22_25722642_25722694_+@UTR3	-0.0516937	0.00289836	0.0269864	NA
LRPPRC	0.28690955794236284,0.713090442057637	0.2394957674169266,0.7605042325830733	0.730141	0.774391	0.331531	0.287218	-0.0848885	2	chr2_43887730_43887782_-@UTR3,chr2_43888482_43888533_-@UTR3	-0.0464156380733419,0.04751528630668489	chr2_43888482_43888533_-@UTR3	0.0475153	0.00509872	0.0372731	NA
FBXO45	0.11621893885781158,0.08376066113925669,0.1726759809035342,0.15132382174713607,0.16777106961979446,0.2123316660436726,0.0959178616887945	0.12487067172653125,0.0948957806858991,0.12689114342850563,0.15701983239753758,0.17926524725218065,0.24470083249176758,0.07235649201757818	0.296217	0.297322	0.34862	0.34766	-0.00537447	7	chr3_196584880_196584932_+@UTR3,chr3_196585658_196585710_+@UTR3,chr3_196585940_196585992_+@UTR3,chr3_196586172_196586224_+@UTR3,chr3_196586312_196586364_+@UTR3,chr3_196586950_196587002_+@UTR3,chr3_196587206_196587258_+@UTR3	0.008953947938908288,0.011424748442129748,-0.045370934118176914,0.005968277587040632,0.011742909445108612,0.03254273111541564,-0.023189446499773836	chr3_196585940_196585992_+@UTR3	-0.0453709	0.00770218	0.0469006	NA
ASH1L	0.12751202850006332,0.0679516370846139,0.17701869453365104,0.11594438113654938,0.24913088331779418,0.26244237542732834	0.08976758420584895,0.041515432028700734,0.19918284950860832,0.11887378854644069,0.24992496071472714,0.3007353849956742	0.266456	0.304821	0.329565	0.312335	-0.194066	6	chr1_155335516_155335568_-@UTR3,chr1_155335696_155335748_-@UTR3,chr1_155336146_155336198_-@UTR3,chr1_155336464_155336516_-@UTR3,chr1_155336798_155336849_-@UTR3,chr1_155482012_155482064_-@UTR3	-0.03738506170730284,-0.026084600896961435,0.022322122977757458,0.0031849298548159433,0.0010048389841325611,0.03837585190998305	chr1_155482012_155482064_-@UTR3	0.0383759	0.00133417	0.0187769	NA
HLA-E	0.618605644786028,0.16052050767036716,0.22087384754360484	0.6765873937222904,0.14900981689929912,0.17440278937841044	0.600165	0.638357	0.282918	0.237502	-0.0890028	3	chr6_30492986_30493038_+@UTR3,chr6_30493306_30493358_+@UTR3,chr6_30494158_30494210_+@UTR3	0.05766502840192711,-0.011823431366801168,-0.04666072544122349	chr6_30492986_30493038_+@UTR3	0.057665	0.00509274	0.0372731	NA
SIDT2	0.5652779995151344,0.3402825820871694,0.09443941839769629	0.5933142083034505,0.22699019842218507,0.1796955932743645	0.660975	0.631932	0.239272	0.269414	0.0648263	3	chr11_117196276_117196328_+@UTR3,chr11_117197416_117197468_+@UTR3,chr11_117198792_117198844_+@UTR3-EX	0.026717795601350458,-0.11362354099313293,0.08202269361452079	chr11_117197416_117197468_+@UTR3	-0.113624	0.00112735	0.0175808	NA
ZSWIM6	0.11543513957307061,0.8845648604269294	0.25997150997151,0.74002849002849	0.298689	0.409636	0.889076	0.778129	-0.455697	2	chr5_61544404_61544456_+@UTR3,chr5_61544594_61544646_+@UTR3	0.1249194649194649,-0.14090484423817773	chr5_61544594_61544646_+@UTR3	-0.140905	0.00617562	0.0419502	NA
PSRC1	0.13822373495802492,0.861776265041975	0.23177216532233733,0.7682278346776626	0.872789	0.795457	0.27466	0.351992	0.13385	2	chr1_109279586_109279638_-@UTR3,chr1_109279854_109279906_-@UTR3	0.09286726072830123,-0.0927547855205485	chr1_109279586_109279638_-@UTR3	0.0928673	0.00281408	0.0265945	NA
CUX1	0.1377041557686719,0.11227501695243632,0.09379815299170141,0.047385127062546425,0.09005311763376281,0.08251977784235849,0.1780895411540573,0.14666343763117956,0.11151167296328589	0.10783567813090149,0.10860952568161768,0.06784833816567563,0.0603589388971963,0.11965831654299146,0.08744214059892963,0.21706774815189234,0.12695816630745868,0.10422114752333682	0.259515	0.25209	0.297129	0.305546	0.0418796	9	chr7_102249392_102249444_+@UTR3,chr7_102250604_102250656_+@UTR3,chr7_102250942_102250994_+@UTR3,chr7_102251114_102251166_+@UTR3,chr7_102251876_102251928_+@UTR3,chr7_102252052_102252104_+@UTR3,chr7_102254922_102254974_+@UTR3,chr7_102255864_102255916_+@UTR3,chr7_102256400_102256452_+@UTR3	-0.029866837329246415,-0.003749340333829926,-0.025962926718908527,0.012823465441617984,0.029406948446504808,0.004807271061756574,0.038765535936759715,-0.019727000003854495,-0.007361738369137963	chr7_102254922_102254974_+@UTR3	0.0387655	0.00382045	0.0317189	NA
SSH2	0.2065121560071055,0.09744688532567321,0.20609749397628185,0.19175044932620688,0.2981930153647325	0.24353344941580238,0.09422111186817068,0.21928483104953692,0.2875186110480228,0.15544199661846722	0.301639	0.1598	0.350972	0.422244	0.916559	5	chr17_29628206_29628258_-@UTR3,chr17_29629748_29629800_-@UTR3,chr17_29629942_29629994_-@UTR3,chr17_29630740_29630792_-@UTR3,chr17_29925366_29925418_-@UTR3	0.035308908255016785,-0.004716194181912367,0.011739372429937694,0.09364236001801149,-0.14261284592638188	chr17_29925366_29925418_-@UTR3	-0.142613	0.00273202	0.0264568	NA
NR6A1	0.33581951235100505,0.2975553638193846,0.19927779375579205,0.16734733007381844	0.2039282635802934,0.20893274083000676,0.26549672365745275,0.3216422719322471	0.360882	0.466305	0.462703	0.335374	-0.369746	4	chr9_124517324_124517376_-@UTR3,chr9_124520496_124520548_-@UTR3,chr9_124520810_124520862_-@UTR3,chr9_124522486_124522538_-@UTR3	-0.1281500634152344,-0.08443402226456148,0.06713334428165338,0.15287262222049094	chr9_124522486_124522538_-@UTR3	0.152873	0.00235247	0.0246664	NA
SLC35E3	0.4522144522144522,0.20959595959595959,0.158008658008658,0.09243534243534245,0.027528027528027525,0.06021756021756022	0.31163637060164345,0.270738066202276,0.13106245863155855,0.08675933197549072,0.13314689601011356,0.06665687657891768	0.48592	0.438381	0.137376	0.199227	0.148534	6	chr12_68764954_68765006_+@UTR3,chr12_68765302_68765354_+@UTR3,chr12_68765790_68765842_+@UTR3,chr12_68766032_68766084_+@UTR3,chr12_68767522_68767574_+@UTR3,chr12_68768410_68768462_+@UTR3	-0.13952174268893464,0.059546626589242424,-0.02748867961278001,-0.006478142059240022,0.10353279978346891,0.00541989863794419	chr12_68764954_68765006_+@UTR3	-0.139522	0.000212381	0.00781388	NA
ATF7IP	0.346027708940191,0.13684454604185783,0.11822838366295287,0.11949629192323447,0.07841314298310446,0.08831072943434191,0.11267919701431744	0.2645997754679297,0.11867641924903467,0.13508013063767343,0.12731667903236177,0.11264821553148563,0.10489658103279714,0.13678219904871766	0.391209	0.352367	0.210277	0.252872	0.150861	7	chr12_14498148_14498200_+@UTR3,chr12_14498544_14498596_+@UTR3,chr12_14498734_14498786_+@UTR3,chr12_14499914_14499966_+@UTR3,chr12_14501470_14501522_+@UTR3,chr12_14501714_14501766_+@UTR3,chr12_14502438_14502490_+@UTR3	-0.08186163641983102,-0.019044383307734905,0.015818358751111247,0.006826590638268765,0.033090701232221464,0.015520413538798128,0.023040942517240606	chr12_14498148_14498200_+@UTR3	-0.0818616	0.00676991	0.0440627	NA
SLITRK6	0.34393939393939393,0.6560606060606061	0.47373737373737373,0.5262626262626262	0.720286	0.626204	0.49405	0.588132	0.201938	2	chr13_85793724_85793776_-@UTR3,chr13_85793878_85793930_-@UTR3	0.09138409922173635,-0.15361616050503113	chr13_85793878_85793930_-@UTR3	-0.153616	0.00762864	0.0465424	NA
CD63	0.026485261510369115,0.9735147384896309	0.09220507043764542,0.9077949295623546	0.972668	0.912198	0.101292	0.161762	0.0926001	2	chr12_55724822_55724874_-@UTR3-EX,chr12_55725444_55725496_-@UTR3	0.06409440757670856,-0.06546573734609018	chr12_55725444_55725496_-@UTR3	-0.0654657	0.00172551	0.0213058	NA
SP2	0.295258449939301,0.445040572487381,0.25970097757331795	0.3345026204846295,0.508082497212932,0.15741488230243852	0.495445	0.554843	0.445324	0.383224	-0.163356	3	chr17_47928062_47928114_+@UTR3,chr17_47928360_47928412_+@UTR3,chr17_47928736_47928788_+@UTR3	0.03790242411000627,0.061564074684634096,-0.10253813444985785	chr17_47928736_47928788_+@UTR3	-0.102538	0.00239146	0.0247194	NA
PRPSAP1	0.08282840167068652,0.9171715983293135	0.1314097123998114,0.8685902876001886	0.920898	0.876693	0.16171	0.205916	0.07097	2	chr17_76310906_76310958_-@UTR3,chr17_76311454_76311506_-@UTR3	0.04820583938431418,-0.04834590868802269	chr17_76311454_76311506_-@UTR3	-0.0483459	0.00115779	0.0177317	NA
CNTNAP3P2	0.8624708624708625,0.13752913752913754	0.5679770679770679,0.432022932022932	0.872954	0.638997	0.297034	0.53099	0.450095	2	chr9_67296900_67296952_+@UTR3-EX,chr9_67297120_67297172_+@UTR3-EX	-0.2861715242924019,0.23579008262343842	chr9_67296900_67296952_+@UTR3-EX	-0.286172	0.000625285	0.0135286	NA
OTUB2	0.4616931703908234,0.17874674029759163,0.3595600893115849	0.4003653556845046,0.3245433053943692,0.2750913389211262	0.480317	0.519323	0.40065	0.352908	-0.112645	3	chr14_94045872_94045924_+@UTR3,chr14_94046500_94046552_+@UTR3,chr14_94048542_94048594_+@UTR3	-0.06298231422609535,0.13899102549600062,-0.0865015246234152	chr14_94046500_94046552_+@UTR3	0.138991	0.00314453	0.0284184	NA
ZSCAN26	0.282567529935951,0.42197955205474,0.295452918009309	0.4082080200501253,0.23907984246330116,0.3527121374865736	0.467453	0.500895	0.490167	0.457753	-0.0996874	3	chr6_28277504_28277556_+@UTR3,chr6_28277766_28277818_+@UTR3,chr6_28277988_28278040_+@UTR3	0.12180993174128191,-0.17994328072131272,0.055336501789590986	chr6_28277766_28277818_+@UTR3	-0.179943	0.000458511	0.0114202	NA
SPTLC1	0.09897017117083597,0.15199391925826536,0.36900252284269436,0.13177611999110342,0.24825726673710088	0.09426006282494216,0.15668097207131504,0.3165559826558909,0.16758523567897332,0.2649177467688786	0.266322	0.282765	0.374762	0.366373	-0.086433	5	chr9_92031320_92031372_-@UTR3,chr9_92031628_92031680_-@UTR3,chr9_92031994_92032046_-@UTR3,chr9_92032158_92032210_-@UTR3,chr9_92055462_92055514_-@UTR3	-0.004949604790943515,0.0044384386816554156,-0.05251076702390517,0.035472924693539964,0.016411533391389344	chr9_92031994_92032046_-@UTR3	-0.0525108	0.00544802	0.0389037	NA
OSBPL8	0.11285952259292768,0.14326341223512307,0.19654790384171564,0.11357934197632724,0.1943793442620533,0.23937047509185302	0.12305529268185939,0.15107508764914548,0.13749032708503087,0.1156116124246027,0.2356248147029424,0.2371428654564193	0.401101	0.403375	0.260859	0.257702	-0.00815604	6	chr12_76353090_76353142_-@UTR3,chr12_76354358_76354410_-@UTR3,chr12_76354816_76354868_-@UTR3,chr12_76355088_76355140_-@UTR3,chr12_76355642_76355694_-@UTR3,chr12_76355864_76355916_-@UTR3	0.010114159560583827,0.007733727043527067,-0.05900901345959597,0.001959443945920028,0.04109281402518855,-0.002285187607243999	chr12_76354816_76354868_-@UTR3	-0.059009	0.00220158	0.0239236	NA
HAUS5	0.5838442096206071,0.17706568793525315,0.15927464529949,0.07981545714464969	0.4517530716212166,0.18984117470782136,0.19318749375686745,0.1652182599140945	0.567843	0.504538	0.165596	0.254698	0.170531	4	chr19_35623342_35623394_+@UTR3,chr19_35623570_35623622_+@UTR3,chr19_35623906_35623958_+@UTR3,chr19_35625132_35625184_+@UTR3	-0.13177060368784266,0.009574467785576912,0.030411341706858996,0.08104825335687157	chr19_35623342_35623394_+@UTR3	-0.131771	0.00444674	0.0343505	NA
RDH10	0.4210971268751589,0.37932875667429444,0.19957411645054665	0.40754835173439824,0.21353848563150887,0.37891316263409286	0.560255	0.495289	0.409755	0.470447	0.177814	3	chr8_73323160_73323212_+@UTR3,chr8_73323406_73323458_+@UTR3,chr8_73323576_73323628_+@UTR3	-0.01500187490336552,-0.16545126133462476,0.1728966079819649	chr8_73323576_73323628_+@UTR3	0.172897	0.00396908	0.0324328	NA
SRGAP2	0.2627715145162802,0.3101760956446899,0.23839081047455923,0.18866157936447073	0.3234765400193283,0.21314278320103952,0.2790497106186138,0.1843309661610184	0.456179	0.471927	0.359669	0.341791	-0.0489624	4	chr1_206461462_206461514_+@UTR3,chr1_206462476_206462528_+@UTR3,chr1_206462718_206462770_+@UTR3,chr1_206464280_206464332_+@UTR3	0.05994623591671833,-0.09675282851306258,0.04009257923736356,-0.0046026095006789225	chr1_206462476_206462528_+@UTR3	-0.0967528	0.0025104	0.0253835	NA
OGA	0.09894818029137059,0.14332813109554862,0.19422838595189867,0.26554095914362497,0.24380839780331479,0.054145945714242236	0.12284867951979035,0.13512205934650004,0.1762497394163627,0.2791486338410116,0.23407073028235878,0.05256015759397653	0.144609	0.141019	0.416114	0.4179	0.0362655	6	chr10_101784494_101784546_-@UTR3,chr10_101785324_101785376_-@UTR3,chr10_101785744_101785796_-@UTR3,chr10_101785906_101785958_-@UTR3,chr10_101786232_101786284_-@UTR3,chr10_101797334_101797386_-@UTR3	0.023761967290167094,-0.008307687317153561,-0.018066815026779925,0.013500622349954083,-0.009830761458321957,-0.0017063833022103528	chr10_101784494_101784546_-@UTR3	0.023762	0.00296242	0.0273896	NA
ENSA	0.41727904105042984,0.29090840283204494,0.09386200166919494,0.0758721482447387,0.12207840620359162	0.45166869112513813,0.34049298517880194,0.06462349571867931,0.05100523857918926,0.09220958939819146	0.185047	0.14096	0.511828	0.555477	0.39261	5	chr1_150622212_150622264_-@UTR3,chr1_150622362_150622414_-@UTR3,chr1_150623736_150623788_-@UTR3,chr1_150624788_150624840_-@UTR3,chr1_150625086_150625138_-@UTR3	0.03430352917572477,0.04946853591690553,-0.029293783853186428,-0.024928696814226478,-0.029922660864835013	chr1_150622362_150622414_-@UTR3	0.0494685	6.63e-07	0.000320333	NA
MMP16	0.036011379021944186,0.11277195824941587,0.06923200978130824,0.05833361462095555,0.12198337777677763,0.10727653573665479,0.12782234623880942,0.1227722957945625,0.11684087746736126,0.1269556053122105	0.07349001106645699,0.08481371464072845,0.11609587046420877,0.07662065350340731,0.1321713553497583,0.11042188440406159,0.13448172093113558,0.07548973925874154,0.09703050070864155,0.09938454967286	0.317028	0.28793	0.193247	0.232571	0.138892	10	chr8_88034636_88034688_-@UTR3,chr8_88036886_88036938_-@UTR3,chr8_88037028_88037080_-@UTR3,chr8_88037206_88037258_-@UTR3,chr8_88037988_88038040_-@UTR3,chr8_88039584_88039636_-@UTR3,chr8_88040726_88040778_-@UTR3,chr8_88041098_88041150_-@UTR3,chr8_88041234_88041286_-@UTR3,chr8_88041452_88041504_-@UTR3	0.03573437552748687,-0.029281722412029185,0.045098771487597736,0.016689862117370738,0.008728939347408315,0.0016433987706968023,0.005196959725742245,-0.048432282024399614,-0.021174342502479335,-0.028801213226632344	chr8_88041098_88041150_-@UTR3	-0.0484323	0.001323	0.0187116	NA
HIF1AN	0.3365322343244039,0.19360755033407376,0.17857170468297934,0.19923342937767433,0.09205508128086874	0.35493385485816437,0.14686466821128266,0.23630361683110754,0.18392666545180017,0.07797119464764533	0.467894	0.477561	0.263304	0.251678	-0.0295021	5	chr10_100548382_100548434_+@UTR3,chr10_100549968_100550020_+@UTR3,chr10_100550392_100550444_+@UTR3,chr10_100551212_100551264_+@UTR3,chr10_100553890_100553942_+@UTR3	0.018589589089216207,-0.04634109972093789,0.057880869745700225,-0.01498325074160467,-0.013722918664745953	chr10_100550392_100550444_+@UTR3	0.0578809	0.00116538	0.0177317	NA
ATXN1	0.037159546548678736,0.11631959116092068,0.11301681016691711,0.05693698773628827,0.08178531149076619,0.09660559168241874,0.1907627587456663,0.12518730552668375,0.06219538649965245,0.12003071044200775	0.055807215501675805,0.09226888387011171,0.08884641676617688,0.08544972858222427,0.11966160029766539,0.0672876682299869,0.16383206710162734,0.09016294440694782,0.10472208521537474,0.13196139002820897	0.306159	0.306224	0.218938	0.218855	-0.000307382	10	chr6_16299330_16299382_-@UTR3,chr6_16300944_16300996_-@UTR3,chr6_16301452_16301504_-@UTR3,chr6_16301968_16302020_-@UTR3,chr6_16303568_16303620_-@UTR3,chr6_16304134_16304186_-@UTR3,chr6_16304930_16304982_-@UTR3,chr6_16305160_16305212_-@UTR3,chr6_16305658_16305710_-@UTR3,chr6_16306208_16306260_-@UTR3	0.016938154405822352,-0.02548241316256529,-0.02561854367413295,0.026811123890403417,0.0361835701102958,-0.030753296617878526,-0.028228372960539677,-0.03639053830451204,0.04078404259731648,0.010368044054993822	chr6_16305658_16305710_-@UTR3	0.040784	0.000139393	0.00643514	NA
SNX6	0.045236764670597285,0.10658164378847594,0.28323795717728256,0.2570556376093564,0.3078879967542878	0.08188803415816877,0.0943960229381174,0.23955905219879667,0.22668698288137026,0.3574699078235469	0.34767	0.391506	0.338577	0.31548	-0.171314	5	chr14_34562524_34562576_-@UTR3,chr14_34562782_34562834_-@UTR3,chr14_34562986_34563038_-@UTR3,chr14_34567738_34567790_-@UTR3,chr14_34597570_34597622_-@UTR3	0.03628332147406021,-0.012427093170835901,-0.04381085521412126,-0.030519947621784865,0.04925940149208824	chr14_34597570_34597622_-@UTR3	0.0492594	0.00122716	0.0179478	NA
APMAP	0.14160097647007439,0.8583990235299256	0.19241408254748302,0.8075859174525171	0.86694	0.820327	0.209397	0.25601	0.0797322	2	chr20_24962918_24962970_-@UTR3,chr20_24963518_24963570_-@UTR3	0.050496011039599276,-0.05062488264572018	chr20_24963518_24963570_-@UTR3	-0.0506249	0.00432041	0.0337803	NA
DENND2D	0.04518518518518518,0.16982905982905983,0.20527065527065527,0.1380911680911681,0.13350427350427352,0.30811965811965814	0.09025756987891427,0.12420380878477778,0.08790739124108832,0.07186332993840633,0.17021618410204184,0.45555171605477146	0.415415	0.499068	0.294101	0.232517	-0.264684	6	chr1_111185490_111185542_-@UTR3-EX,chr1_111185720_111185772_-@UTR3-EX,chr1_111185948_111186000_-@UTR3,chr1_111186100_111186152_-@UTR3,chr1_111186504_111186556_-@UTR3,chr1_111187234_111187286_-@UTR3	0.021721659365337515,-0.06467327789166871,-0.13488580212718143,-0.08613912521958499,0.015508758899563518,0.12885876291048698	chr1_111185948_111186000_-@UTR3	-0.134886	0.00559318	0.0395121	NA
AC025165.3	0.7993827160493828,0.2006172839506173	0.4228820714888826,0.5771179285111173	0.823782	0.536323	0.366624	0.654082	0.61916	2	chr12_57796700_57796752_+@UTR3,chr12_57796886_57796938_+@UTR3	-0.35765945839306995,0.3582809325103039	chr12_57796886_57796938_+@UTR3	0.358281	6.57e-05	0.00429005	NA
QRSL1	0.0322944722329101,0.07684187066484167,0.5625534831597693,0.23124215492717884,0.09706801901530016	0.0709277925822938,0.06722022683093241,0.482918163210134,0.1930586130099512,0.18587520436668856	0.144973	0.155702	0.497923	0.488455	-0.103009	5	chr6_106652750_106652802_+@UTR3,chr6_106652952_106653004_+@UTR3,chr6_106666012_106666064_+@UTR3,chr6_106666330_106666382_+@UTR3,chr6_106667904_106667956_+@UTR3	0.03783355803027062,-0.009990531918925682,-0.07919469834733056,-0.038210366438669874,0.08757614463688075	chr6_106667904_106667956_+@UTR3	0.0875761	0.00829872	0.0492636	NA
TPMT	0.09770187644950454,0.21927753180125098,0.36315974418441216,0.31986084756483246	0.21437621188083902,0.17720452141723952,0.20779074123038957,0.4006285254715318	0.523393	0.473523	0.249262	0.306949	0.144458	4	chr6_18128408_18128460_-@UTR3,chr6_18129210_18129262_-@UTR3,chr6_18130322_18130374_-@UTR3,chr6_18130594_18130646_-@UTR3	0.11762617088948671,-0.03910269386638479,-0.15101519580139242,0.08138844845521515	chr6_18130322_18130374_-@UTR3	-0.151015	0.000872509	0.0160915	NA
UBE2J1	0.09331027836045128,0.06910869023949787,0.21113685483622313,0.19035914900163076,0.18562232015778432,0.11059209241616047,0.139870614988252	0.1322443637899603,0.06542487527947208,0.22663443256783045,0.18758767422949862,0.18487912011925575,0.10331622329034917,0.09991331072363367	0.350507	0.325754	0.291079	0.319396	0.105662	7	chr6_89327624_89327676_-@UTR3,chr6_89328220_89328272_-@UTR3,chr6_89328434_89328486_-@UTR3,chr6_89328774_89328826_-@UTR3,chr6_89329160_89329212_-@UTR3,chr6_89329306_89329358_-@UTR3,chr6_89329658_89329710_-@UTR3	0.03942745418457895,-0.0030839864581026916,0.015959727839809867,-0.002252468513960937,-0.00022351962856934082,-0.006693229754396804,-0.039313153283414934	chr6_89327624_89327676_-@UTR3	0.0394275	0.00648622	0.0430268	NA
SATB2	0.44344193817878025,0.250577485380117,0.2460108604845447,0.059969715956558055	0.5262047837363092,0.210510371622892,0.20407323852886627,0.059211606111932436	0.0626201	0.0614849	0.543087	0.543745	0.0263935	4	chr2_199270974_199271026_-@UTR3,chr2_199271380_199271432_-@UTR3,chr2_199271720_199271772_-@UTR3,chr2_199396914_199396966_-@UTR3	0.08254187823966969,-0.03938025018609079,-0.04131027734803608,-0.00026620466281018773	chr2_199270974_199271026_-@UTR3	0.0825419	0.003188	0.0286065	NA
KMT5C	0.9456753994797472,0.054324600520252696	0.7542934415145369,0.2457065584854632	0.945794	0.754839	0.0564334	0.247388	0.325356	2	chr19_55348052_55348104_+@UTR3,chr19_55371318_55371370_+@UTR3-EX	-0.18607250741859704,0.1930591479198397	chr19_55371318_55371370_+@UTR3-EX	0.193059	6.11e-06	0.00126563	NA
COL5A2	0.23087506573964856,0.29422660810864576,0.11731068501452223,0.3575876411371834	0.2097310373843749,0.28090022562935363,0.15905701405488826,0.35031172293138324	0.399347	0.416632	0.393512	0.376957	-0.0611299	4	chr2_189032624_189032676_-@UTR3,chr2_189032798_189032850_-@UTR3,chr2_189033540_189033592_-@UTR3,chr2_189033802_189033854_-@UTR3	-0.021479825092065058,-0.013647324033879915,0.04129021361755507,-0.0075676626750331155	chr2_189033540_189033592_-@UTR3	0.0412902	0.00417804	0.0332774	NA
NUCKS1	0.08814995512738871,0.12182125180853114,0.09207963037042571,0.11593455061944356,0.1356941368132248,0.16660032218316267,0.08730503913333801,0.11618542993592153,0.07622968400856403	0.09481615778040187,0.11412541926528151,0.08073635752351818,0.11291961420363485,0.13879163025049074,0.16470104138866765,0.08967261253605584,0.11814545963979393,0.08609170741215533	0.276223	0.281068	0.277984	0.273237	-0.0250881	9	chr1_205713522_205713574_-@UTR3,chr1_205714160_205714212_-@UTR3,chr1_205714368_205714420_-@UTR3,chr1_205714466_205714517_-@UTR3,chr1_205715110_205715162_-@UTR3,chr1_205716480_205716532_-@UTR3,chr1_205716684_205716736_-@UTR3,chr1_205716936_205716988_-@UTR3,chr1_205717470_205717522_-@UTR3	0.006638097009364338,-0.007719540716310883,-0.011367118440008081,-0.003040196089928199,0.003071825460740696,-0.0019224892617374645,0.002340583336613064,0.0019334151787666898,0.009833054895763901	chr1_205714368_205714420_-@UTR3	-0.0113671	0.00264517	0.0259921	NA
PSIP1	0.04883645895131395,0.28566157375091955,0.11837730417589547,0.18463288467730377,0.1900821937309024,0.04542008580970445,0.12698949890396047	0.06391812865497076,0.21859649122807015,0.12453216374269005,0.19590643274853803,0.21089181286549707,0.08764619883040936,0.09850877192982456	0.188893	0.199684	0.366058	0.358609	-0.0801524	7	chr9_15464040_15464092_-@UTR3,chr9_15464298_15464350_-@UTR3,chr9_15464562_15464614_-@UTR3,chr9_15465322_15465374_-@UTR3,chr9_15465460_15465512_-@UTR3,chr9_15470742_15470794_-@UTR3,chr9_15471200_15471252_-@UTR3	0.015009696285427102,-0.06672844572190431,0.006108459120225715,0.011234484185839055,0.020642603025833123,0.04204108552299013,-0.02833044490087662	chr9_15464298_15464350_-@UTR3	-0.0667284	0.00609563	0.0417887	NA
ZNF850	0.12671680544363864,0.5436229743038768,0.32966022025248454	0.3181818181818182,0.4065656565656566,0.27525252525252525	0.600873	0.476425	0.248038	0.404502	0.334811	3	chr19_36745312_36745364_-@UTR3,chr19_36746802_36746854_-@UTR3,chr19_36747164_36747216_-@UTR3	0.19702229366863516,-0.12441278051034149,-0.042312954203198194	chr19_36745312_36745364_-@UTR3	0.197022	0.000904232	0.0164437	NA
NFKBIA	0.033503661089867985,0.9664963389101321	0.11720304063654448,0.8827969593634556	0.966796	0.888156	0.0902005	0.16884	0.122398	2	chr14_35400718_35400770_-@UTR3-EX,chr14_35401550_35401602_-@UTR3	0.08400866822326905,-0.08262459501093877	chr14_35400718_35400770_-@UTR3-EX	0.0840087	0.000239542	0.00837906	NA
ZNF639	0.5790389330195155,0.18287143277434537,0.1477316857899382,0.09035794841620085	0.4876717485413138,0.28806700545830977,0.10755262249827467,0.11670862350210176	0.579864	0.558482	0.181465	0.208005	0.0542042	4	chr3_179334454_179334506_+@UTR3,chr3_179335506_179335558_+@UTR3,chr3_179336742_179336794_+@UTR3,chr3_179339512_179339564_+@UTR3-EX	-0.09192280556277438,0.10149806883124196,-0.042749881269885645,0.022908496457521507	chr3_179335506_179335558_+@UTR3	0.101498	0.00623516	0.0421571	NA
ANP32E	0.09742273356168314,0.3176427425843446,0.24757080190732514,0.27341310114273715,0.06395062080390994	0.14257962385536824,0.297785222287988,0.21308352312236034,0.27159384319558494,0.07495778753869844	0.327518	0.3202	0.421307	0.427522	0.0326021	5	chr1_150218594_150218646_-@UTR3,chr1_150219030_150219082_-@UTR3,chr1_150219338_150219390_-@UTR3,chr1_150219528_150219580_-@UTR3,chr1_150220358_150220410_-@UTR3	0.045037971725609444,-0.019798460513888116,-0.034388153420191386,-0.00182096719941377,0.010992756142446769	chr1_150218594_150218646_-@UTR3	0.045038	0.00309906	0.028127	NA
DCP2	0.16219299537228518,0.09048531451610635,0.09312889231520483,0.1089807147807705,0.07643796633144417,0.12740776848358323,0.06586620298858531,0.09226157483608549,0.08995475918720035,0.09328381118873467	0.1606769612594355,0.10032308573442594,0.09041028871853614,0.08460055805210444,0.08063276059564721,0.11474090815637207,0.07560073427908481,0.11419633741592505,0.08323381795752931,0.09558454783093957	0.304482	0.303211	0.198378	0.201132	0.00603703	10	chr5_113013456_113013508_+@UTR3,chr5_113013630_113013682_+@UTR3,chr5_113014050_113014102_+@UTR3,chr5_113014340_113014392_+@UTR3,chr5_113014504_113014556_+@UTR3,chr5_113014830_113014882_+@UTR3,chr5_113015038_113015090_+@UTR3,chr5_113015522_113015574_+@UTR3,chr5_113016328_113016380_+@UTR3,chr5_113020732_113020784_+@UTR3	-0.001217379312576261,0.010144891541783038,-0.002396218543723405,-0.024034348806850944,0.004511361631627714,-0.012344294240615838,0.010046712590733323,0.022219296778278566,-0.00639014790219615,0.002616500240430586	chr5_113014340_113014392_+@UTR3	-0.0240343	0.0034913	0.0300909	NA
MIOS	0.7414021164021163,0.25859788359788366	0.8398540926385962,0.16014590736140372	0.77369	0.854734	0.376253	0.295209	-0.14372	2	chr7_7607192_7607244_+@UTR3,chr7_7607454_7607506_+@UTR3	0.09744412400865177,-0.09424989414174709	chr7_7607192_7607244_+@UTR3	0.0974441	0.00379243	0.0315586	NA
FNDC3B	0.10215594370513931,0.12516965380372258,0.2206143981187529,0.2627122055104567,0.06655454581124555,0.11721066781938877,0.10558258523129431	0.1255204110008156,0.11205802725750548,0.19655985001604678,0.25562549476058044,0.06054974179977831,0.14019135171043393,0.10949512345483951	0.33401	0.332086	0.308322	0.310008	0.0083333	7	chr3_172397462_172397514_+@UTR3,chr3_172398330_172398382_+@UTR3,chr3_172398526_172398578_+@UTR3,chr3_172398696_172398748_+@UTR3,chr3_172399378_172399430_+@UTR3,chr3_172399838_172399890_+@UTR3,chr3_172400094_172400146_+@UTR3	0.02321954929154861,-0.013212256272328138,-0.024130870010643818,-0.007177121880526438,-0.00612153098060076,0.02283520317435546,0.0037901623325925227	chr3_172398526_172398578_+@UTR3	-0.0241309	0.00174361	0.0214559	NA
EXOSC2	0.2890206290508864,0.25980295302079787,0.13038707817530545,0.11257431683076358,0.15067328563424826,0.05754173728799842	0.2905220402301656,0.35413601854636384,0.1300858914297746,0.09394979572567855,0.07497546988361733,0.056330784184400164	0.436969	0.471646	0.206814	0.165688	-0.110171	6	chr9_130703844_130703896_+@UTR3,chr9_130704126_130704178_+@UTR3,chr9_130704518_130704570_+@UTR3,chr9_130706182_130706234_+@UTR3-EX,chr9_130706350_130706402_+@UTR3-EX,chr9_130707464_130707516_+@UTR3-EX	0.002214603110987534,0.0947268362680807,0.0006408154622900564,-0.01756396451303699,-0.07438418001851958,-0.0002110676707035436	chr9_130704126_130704178_+@UTR3	0.0947268	3.74e-05	0.00326662	NA
SNRNP70	0.6358937198067632,0.36410628019323665	0.5559066791510613,0.44409332084893877	0.691378	0.627222	0.473383	0.537539	0.140499	2	chr19_49108344_49108396_+@UTR3,chr19_49108574_49108626_+@UTR3	-0.07983839428692296,0.0790259429432843	chr19_49108344_49108396_+@UTR3	-0.0798384	0.00234398	0.024622	NA
RAB9A	0.9685883222468589,0.031411677753141166	0.7809378609378609,0.21906213906213903	0.968565	0.793612	0.0948017	0.269755	0.287415	2	chrX_13709444_13709496_+@UTR3,chrX_13710184_13710236_+@UTR3	-0.1820836232163462,0.18452963258455252	chrX_13710184_13710236_+@UTR3	0.18453	6.05e-05	0.00425729	NA
KLC1	0.20042586476708035,0.05578143178105637,0.24611619924089376,0.09265283150493984,0.16771377425371423,0.1034656975702099,0.08178433017222166,0.05205987070988381	0.2538942942192801,0.03295693082703636,0.22907508482691144,0.12083927642124108,0.10990565998459585,0.1000681529590541,0.09134673910780823,0.06191386165407272	0.245666	0.262904	0.29802	0.286491	-0.0978415	8	chr14_103590490_103590542_+@UTR3,chr14_103590862_103590914_+@UTR3,chr14_103684974_103685026_+@UTR3,chr14_103685186_103685238_+@UTR3,chr14_103685820_103685872_+@UTR3,chr14_103686138_103686190_+@UTR3,chr14_103686706_103686758_+@UTR3,chr14_103701512_103701564_+@UTR3	0.05360252950564939,-0.022312041287740843,-0.016635666195840976,0.028495877650094564,-0.05720694140580736,-0.0029912924510115957,0.009935851097536585,0.010238286315558183	chr14_103685820_103685872_+@UTR3	-0.0572069	0.000162687	0.0068414	NA
RPTOR	0.16058344640434194,0.3287124981154832,0.33498417005879694,0.17571988542137795	0.16411420516939013,0.40646583514988616,0.3130737165303569,0.11634624315036686	0.32729	0.356912	0.458789	0.436312	-0.125002	4	chr17_80964454_80964506_+@UTR3,chr17_80965490_80965542_+@UTR3,chr17_80966020_80966072_+@UTR3,chr17_80966250_80966302_+@UTR3	0.003752041402617312,0.0775229800823643,-0.021589462308825913,-0.05883253505843003	chr17_80965490_80965542_+@UTR3	0.077523	0.00445258	0.0343505	NA
AC005077.4	0.2477404718693285,0.34941923774954625,0.40284029038112523	0.09794890690248097,0.37679989706518807,0.5252511960323308	0.544464	0.648974	0.346173	0.214579	-0.253324	3	chr7_76070520_76070572_-@UTR3-EX,chr7_76071150_76071202_-@UTR3-EX,chr7_76071296_76071348_-@UTR3-EX	-0.14275796554110864,0.03143412045958138,0.12455209733524042	chr7_76070520_76070572_-@UTR3-EX	-0.142758	2.18e-05	0.00267581	NA
NUDT5	0.08439952867405437,0.10029347839454035,0.06572521218405401,0.10371423227009914,0.05793644090011476,0.07743527035222586,0.5104958372249114	0.08499199880912507,0.0605790629302966,0.11075821517621226,0.10841368017565405,0.10296483197499161,0.10306719759840223,0.42922501333531815	0.457175	0.435421	0.198306	0.215498	0.0703345	7	chr10_12165470_12165522_-@UTR3,chr10_12165698_12165750_-@UTR3,chr10_12165876_12165928_-@UTR3,chr10_12166016_12166068_-@UTR3,chr10_12166544_12166596_-@UTR3,chr10_12167278_12167330_-@UTR3,chr10_12167640_12167692_-@UTR3	-8.908090259961143e-05,-0.040269847020047544,0.04419508681472552,0.00401213743410106,0.04418351981859988,0.02486134363988654,-0.08140589904989959	chr10_12167640_12167692_-@UTR3	-0.0814059	0.00193249	0.0223393	NA
LMNA	0.26761407316962865,0.3289103443424431,0.3524535592436827,0.05102202324424547	0.21495549565131086,0.35218130311375134,0.3799146894174521,0.052948511817485576	0.459765	0.429505	0.369738	0.394716	0.0982245	4	chr1_156137802_156137854_+@UTR3,chr1_156139216_156139268_+@UTR3,chr1_156139290_156139341_+@UTR3,chr1_156140040_156140092_+@UTR3	-0.05322971699112336,0.022653096587135158,0.026848093814646923,0.0011066009058594423	chr1_156137802_156137854_+@UTR3	-0.0532297	0.00324021	0.0289062	NA
CDK6	0.10528569659004441,0.08356508762305866,0.07689405602449081,0.08547150112367503,0.08858263582901266,0.08215533259011522,0.09327057269086256,0.1306957347537058,0.17540349076580963,0.07867589200922535	0.12356707780596095,0.07665557771456925,0.07686335544281024,0.09013392417536563,0.07271990323940518,0.09606883944031337,0.11668679837930784,0.11604844039154856,0.1599902218302545,0.07126586158046451	0.292305	0.286435	0.224111	0.231746	0.0292681	10	chr7_92606956_92607008_-@UTR3,chr7_92607888_92607940_-@UTR3,chr7_92609844_92609896_-@UTR3,chr7_92610492_92610544_-@UTR3,chr7_92611722_92611774_-@UTR3,chr7_92613048_92613100_-@UTR3,chr7_92613698_92613750_-@UTR3,chr7_92613934_92613986_-@UTR3,chr7_92614598_92614650_-@UTR3,chr7_92614936_92614988_-@UTR3	0.017744587111654678,-0.00743819259013602,-0.0005649742850605266,0.0041292746236400585,-0.01637547846259925,0.013368537752836807,0.022867998026692163,-0.01514536989315303,-0.01588133903070199,-0.007938597494594649	chr7_92613698_92613750_-@UTR3	0.022868	0.000726528	0.0147918	NA
SPECC1	0.05333580663195268,0.05282029217120495,0.30249832430359813,0.2650684620765757,0.1658997977456395,0.06981543923734591,0.09056187783368312	0.07063629051005692,0.042857324092113215,0.26856771374436056,0.23044654925187671,0.21333349105673996,0.09305468407658775,0.08110394726826488	0.0883061	0.093334	0.398577	0.395343	-0.0798889	7	chr17_20236984_20237036_+@UTR3,chr17_20237152_20237204_+@UTR3,chr17_20314248_20314300_+@UTR3,chr17_20314382_20314434_+@UTR3,chr17_20314630_20314682_+@UTR3,chr17_20314690_20314741_+@UTR3,chr17_20316204_20316256_+@UTR3	0.016880548239899866,-0.010282108814512837,-0.034060161832458746,-0.03477273309427378,0.046941712860101736,0.022798168723305826,-0.009765786279515784	chr17_20314630_20314682_+@UTR3	0.0469417	0.00566359	0.0398541	NA
IL13RA1	0.36131685497265614,0.31661274514966214,0.3220703998776817	0.3619116490554959,0.29074543189772767,0.34734291904677644	0.487934	0.473274	0.403271	0.421191	0.0440119	3	chrX_118791928_118791980_+@UTR3,chrX_118792278_118792330_+@UTR3,chrX_118793414_118793466_+@UTR3	0.00045774781552210264,-0.02599453113914224,0.025103966735970706	chrX_118792278_118792330_+@UTR3	-0.0259945	0.00404781	0.0327195	NA
MAGOHB	0.02348849652220439,0.053660837486975865,0.5925431556419137,0.330307510348906	0.09140423846306199,0.1459911910892303,0.4300974261758575,0.33250714427185013	0.580615	0.534778	0.0541789	0.128746	0.11864	4	chr12_10600712_10600764_-@UTR3-EX,chr12_10605504_10605556_-@UTR3,chr12_10606100_10606152_-@UTR3,chr12_10606242_10606294_-@UTR3	0.06632330450151103,0.09046405759316381,-0.16027300780848325,0.0015643526352189796	chr12_10606100_10606152_-@UTR3	-0.160273	0.00115145	0.0177317	NA
ZBTB10	0.18380327563744644,0.1737262018151761,0.10738551143517149,0.12941669129963543,0.07797128343241258,0.05814557537141042,0.11044944220010727,0.11842792393339245,0.04067409487524769	0.2261762319289165,0.14928854725759944,0.14146171051059997,0.07261262567071944,0.049025692509318194,0.0641918609636878,0.10010253462197702,0.12807828838643218,0.06906250815074932	0.343098	0.334522	0.1633	0.180259	0.036519	9	chr8_80519772_80519824_+@UTR3,chr8_80520272_80520324_+@UTR3,chr8_80520462_80520514_+@UTR3,chr8_80520972_80521024_+@UTR3,chr8_80521202_80521254_+@UTR3,chr8_80521740_80521792_+@UTR3,chr8_80522008_80522060_+@UTR3,chr8_80523984_80524036_+@UTR3,chr8_80528380_80528432_+@UTR3-EX	0.04143560774225494,-0.025057771414048385,0.033147725918452456,-0.05737397935957858,-0.029628475542152206,0.005187471791084183,-0.01109489702118456,0.008788785079566944,0.027388425434149953	chr8_80520972_80521024_+@UTR3	-0.057374	0.00423558	0.0334588	NA
ARFRP1	0.049556796622224814,0.36496797691551186,0.5854752264622632	0.1581374679044045,0.37149318585818686,0.4703693462374087	0.689487	0.594016	0.222256	0.319282	0.215022	3	chr20_63698620_63698672_-@UTR3,chr20_63699484_63699536_-@UTR3,chr20_63700280_63700332_-@UTR3	0.10690578251746649,0.005999102530813483,-0.11412946890097914	chr20_63700280_63700332_-@UTR3	-0.114129	0.000460804	0.011438	NA
ZNF75A	0.2708333333333333,0.7291666666666666	0.4743589743589744,0.5256410256410257	0.27492	0.477301	0.730675	0.528294	-0.795886	2	chr16_3309286_3309338_+@UTR3,chr16_3318502_3318554_+@UTR3	0.18466645917626306,-0.19919078742608154	chr16_3318502_3318554_+@UTR3	-0.199191	0.00286185	0.0267993	NA
CAMTA2	0.15007519577346862,0.4499487551032832,0.3999760491232482	0.1639186611526706,0.3515595658627362,0.4845217729845932	0.57012	0.603954	0.404812	0.372881	-0.0831723	3	chr17_4967970_4968022_-@UTR3,chr17_4968132_4968184_-@UTR3,chr17_4968354_4968406_-@UTR3	0.01307069935740307,-0.09809127390095101,0.08344990871573638	chr17_4968132_4968184_-@UTR3	-0.0980913	0.000925786	0.0165781	NA
KIF3A	0.16112503480924534,0.2181750672978743,0.04541600915869922,0.17283331786255762,0.4024505708716235	0.11963645673323092,0.31538658474142345,0.05721966205837173,0.10094726062467997,0.4068100358422939	0.456835	0.444377	0.276375	0.289151	0.0398874	5	chr5_132693364_132693416_-@UTR3,chr5_132694410_132694462_-@UTR3,chr5_132694662_132694714_-@UTR3,chr5_132695974_132696026_-@UTR3,chr5_132696564_132696616_-@UTR3	-0.04282053187431986,0.0948635968820207,0.009782035004448651,-0.07294905121083353,0.002963072983106052	chr5_132694410_132694462_-@UTR3	0.0948636	0.00377581	0.0315057	NA
SF3A1	0.1340108401084011,0.865989159891599	0.24673063161566933,0.7532693683843307	0.875098	0.774345	0.220827	0.32158	0.176469	2	chr22_30333746_30333798_-@UTR3,chr22_30334206_30334258_-@UTR3	0.1104699968847078,-0.11202209648821115	chr22_30334206_30334258_-@UTR3	-0.112022	0.000709986	0.0147449	NA
HNRNPUL2-BSCL2	0.2469115641515042,0.3291085597210523,0.131909486355048,0.2920703897723955	0.25148801177557256,0.38597488939824276,0.13728189886707182,0.22525519995911292	0.339453	0.297891	0.420927	0.461672	0.188425	4	chr11_62712762_62712814_-@UTR3,chr11_62712990_62713042_-@UTR3,chr11_62714744_62714796_-@UTR3,chr11_62715054_62715106_-@UTR3	0.00436669674317533,0.05651994836145774,0.005126804889495101,-0.06681057333480053	chr11_62715054_62715106_-@UTR3	-0.0668106	0.00573158	0.0402154	NA
AC104335.1	0.7991039967784154,0.20089600322158466	0.6342913000977517,0.3657086999022483	0.803235	0.642001	0.218017	0.379251	0.323247	2	chr1_247334436_247334488_+@UTR3-EX,chr1_247336804_247336856_+@UTR3-EX	-0.15959123739241043,0.15906957437570807	chr1_247334436_247334488_+@UTR3-EX	-0.159591	0.001011	0.0169261	NA
KIF13A	0.3143618851049191,0.18920995298704277,0.24063754156633413,0.1947597752551313,0.06103084508657264	0.3845055075898735,0.21480773019522667,0.1860811666205093,0.18627409451873386,0.028331501075656632	0.0632499	0.0303468	0.469598	0.486088	1.05952	5	chr6_17759482_17759534_-@UTR3,chr6_17759652_17759704_-@UTR3,chr6_17760168_17760220_-@UTR3,chr6_17760404_17760456_-@UTR3,chr6_17951122_17951174_-@UTR3	0.06912348109191452,0.02468400946603147,-0.0550411591509527,-0.00923458396943988,-0.03346306399843296	chr6_17759482_17759534_-@UTR3	0.0691235	0.0008264	0.0155578	NA
BIVM-ERCC5	0.10488946521296501,0.1507477994468047,0.15060769961382495,0.07218383221386172,0.08466390258606471,0.15763145971134507,0.12012925584049473,0.15914658537463908	0.1775855142332415,0.082979415365779,0.09873593893480258,0.10931282522191614,0.11803881619222528,0.1619605142332415,0.16044440618304256,0.09094256963575147	0.305428	0.32064	0.209858	0.180405	-0.0701198	8	chr13_102839960_102840012_+@UTR3,chr13_102840122_102840174_+@UTR3,chr13_102840324_102840376_+@UTR3,chr13_102840778_102840830_+@UTR3,chr13_102841078_102841130_+@UTR3,chr13_102841288_102841340_+@UTR3,chr13_102866790_102866842_+@UTR3,chr13_102875866_102875918_+@UTR3	0.07216067343740533,-0.06685925112698325,-0.05124427896135714,0.03700362278742046,0.03329550495628432,0.004351256882220211,0.04004782081469238,-0.06744206051317601	chr13_102839960_102840012_+@UTR3	0.0721607	5.77e-05	0.00418088	NA
NDUFS5	0.801218820861678,0.10705782312925169,0.05804988662131519,0.033673469387755096	0.615065065065065,0.1943858143858144,0.09414271414271415,0.09640640640640641	0.736589	0.632885	0.0931143	0.188096	0.218916	4	chr1_39034586_39034638_+@UTR3,chr1_39042816_39042868_+@UTR3-EX,chr1_39049686_39049738_+@UTR3-EX,chr1_39055098_39055150_+@UTR3-EX	-0.18403917057071295,0.08477000946798642,0.03436644053641205,0.06051715035758932	chr1_39034586_39034638_+@UTR3	-0.184039	0.000149657	0.00653444	NA
ULK2	0.21269226520124587,0.1611068939874508,0.07511513935514834,0.551085701456155	0.23244444252707064,0.14028052432356436,0.1384969242190085,0.4887781089303566	0.517059	0.498674	0.287851	0.30864	0.0522319	4	chr17_19774280_19774332_-@UTR3,chr17_19775084_19775136_-@UTR3,chr17_19775570_19775622_-@UTR3,chr17_19776034_19776086_-@UTR3	0.01903663072999856,-0.021291139476706356,0.06227001056082501,-0.06223121871987408	chr17_19775570_19775622_-@UTR3	0.06227	0.00472736	0.0356056	NA
SNX29	0.7722222222222223,0.22777777777777777	0.4125188536953243,0.5874811463046757	0.774852	0.419411	0.236859	0.5923	0.885557	2	chr16_12568772_12568824_+@UTR3,chr16_12573134_12573186_+@UTR3	-0.3337403337403338,0.32333638583638585	chr16_12568772_12568824_+@UTR3	-0.33374	0.00457365	0.0348946	NA
CAPRIN1	0.24553995969982598,0.19093449151427752,0.17846117790342406,0.1781570351090073,0.2069073357734652	0.2513112107275042,0.1761627619933129,0.1896374720567148,0.19547619677327477,0.18741235844919346	0.387298	0.392461	0.372965	0.368546	-0.0191029	5	chr11_34099404_34099456_+@UTR3,chr11_34100064_34100116_+@UTR3,chr11_34100270_34100322_+@UTR3,chr11_34100482_34100534_+@UTR3,chr11_34100860_34100912_+@UTR3	0.005761768164984055,-0.014771086477261247,0.011163487169275649,0.01730353766572687,-0.01949010009463517	chr11_34100860_34100912_+@UTR3	-0.0194901	0.00457323	0.0348946	NA
CCDC82	0.1768774703557312,0.17257862910036825,0.2143086382216817,0.11365325495760277,0.2009391574608966,0.12164284990371947	0.14934437543133194,0.1688750862663906,0.11628709454796411,0.24209799861973771,0.20034506556245688,0.12305037957211869	0.325027	0.341687	0.259421	0.236361	-0.0721129	6	chr11_96353286_96353338_-@UTR3,chr11_96353422_96353474_-@UTR3,chr11_96381114_96381166_-@UTR3,chr11_96381778_96381830_-@UTR3,chr11_96382158_96382210_-@UTR3,chr11_96382572_96382624_-@UTR3	-0.02841143999457313,-0.004988514241997505,-0.09711723463311453,0.12520240394074414,-0.001717555602388593,0.0004515292322033182	chr11_96381778_96381830_-@UTR3	0.125202	0.00738463	0.0460272	NA
ICAM1	0.941789310037764,0.05821068996223596	0.9066092508390139,0.09339074916098618	0.943581	0.910769	0.11948	0.152292	0.0510611	2	chr19_10285844_10285896_+@UTR3,chr19_10286588_10286640_+@UTR3	-0.03513528650656872,0.034450606408343146	chr19_10285844_10285896_+@UTR3	-0.0351353	6.18e-05	0.00425729	NA
MRPS5	0.0690529735178623,0.10624380523530401,0.1571963279055395,0.1913742873286369,0.241004471506393,0.2351281345062642	0.07894901475417043,0.1542877125893727,0.13651257847185297,0.18634373431632142,0.17348891144653175,0.2704180484217507	0.41714	0.412604	0.0791205	0.0891373	0.015774	6	chr2_95087180_95087232_-@UTR3,chr2_95147948_95148000_-@UTR3,chr2_95148186_95148238_-@UTR3,chr2_95148374_95148426_-@UTR3,chr2_95148848_95148900_-@UTR3,chr2_95149264_95149316_-@UTR3	0.009425670190841728,0.04744818502775884,-0.02099712394486919,-0.005391703026401906,-0.06759742435704669,0.034812059785680055	chr2_95148848_95148900_-@UTR3	-0.0675974	0.000359714	0.0100277	NA
SRSF6	0.5834913915599867,0.09028524563066082,0.15397236581468615,0.10243774432495395,0.06981325266971246	0.5389846977231906,0.10673732306914545,0.15802407336910396,0.12341660790535004,0.07283729793320991	0.545407	0.529377	0.184588	0.20178	0.0430391	5	chr20_43460884_43460936_+@UTR3,chr20_43461518_43461570_+@UTR3,chr20_43462068_43462120_+@UTR3,chr20_43462744_43462796_+@UTR3,chr20_43463572_43463624_+@UTR3	-0.04444751898154509,0.016477804103687252,0.00408139375710348,0.02099620162108176,0.003059449017175017	chr20_43460884_43460936_+@UTR3	-0.0444475	0.00344799	0.0299254	NA
TBC1D20	0.1174825341954207,0.32246659411476003,0.5600508716898193	0.18293135287019305,0.3995155322416138,0.4175531148881931	0.6281	0.512744	0.293551	0.389985	0.292754	3	chr20_435462_435514_-@UTR3,chr20_436264_436316_-@UTR3,chr20_438460_438512_-@UTR3	0.06498705039929573,0.07648035198703707,-0.14131642170160857	chr20_438460_438512_-@UTR3	-0.141316	2.88e-05	0.00298458	NA
RIN2	0.2476227206392382,0.4447198446758714,0.3076574346848903	0.25193686623890194,0.5436150733201003,0.2044480604409977	0.406031	0.436734	0.522347	0.495658	-0.105166	3	chr20_20001522_20001574_+@UTR3,chr20_20001962_20002014_+@UTR3,chr20_20002164_20002216_+@UTR3	0.0068521191063639075,0.0995952961159639,-0.09924462494472305	chr20_20001962_20002014_+@UTR3	0.0995953	0.00602217	0.0414124	NA
RWDD1	0.8292855233512811,0.056483178676442515,0.11423129797227634	0.7403702464592393,0.1546894167503067,0.10494033679045389	0.825542	0.758419	0.138241	0.191461	0.122346	3	chr6_116593248_116593300_+@UTR3,chr6_116595140_116595192_+@UTR3,chr6_116595588_116595640_+@UTR3	-0.08807656831381683,0.09502574171305546,-0.010730983841725786	chr6_116595140_116595192_+@UTR3	0.0950257	0.0044765	0.0344069	NA
NFIB	0.11560277430581085,0.0813188899509023,0.051364099045004864,0.10351653881659029,0.0586960762689018,0.10046058704833796,0.03279392855100524,0.05313370748882844,0.08492597766504097,0.08458913968744128,0.11858994028216881,0.11500834088996725	0.08420240984669179,0.08413628668560261,0.05775724087707012,0.11297953718999648,0.0696888227657278,0.09845872719616575,0.06470151312578255,0.06358129146426686,0.07189106655988668,0.09057815694347174,0.10792848720557785,0.09409646013975963	0.25485	0.253435	0.229877	0.231432	0.00803249	12	chr9_14082776_14082828_-@UTR3,chr9_14083046_14083098_-@UTR3,chr9_14084032_14084084_-@UTR3,chr9_14084478_14084530_-@UTR3,chr9_14084770_14084822_-@UTR3,chr9_14085224_14085276_-@UTR3,chr9_14085602_14085654_-@UTR3,chr9_14086356_14086408_-@UTR3,chr9_14086836_14086888_-@UTR3,chr9_14087212_14087264_-@UTR3,chr9_14087710_14087762_-@UTR3,chr9_14087862_14087914_-@UTR3	-0.030952722547426037,0.0031850421266520906,0.006762376827409308,0.009795234038239425,0.011341075498787496,-0.0016227305574558482,0.03221183131512469,0.010810889435220357,-0.012621579259152527,0.006352907656160256,-0.010262833542357394,-0.02048194513255891	chr9_14085602_14085654_-@UTR3	0.0322118	0.00236585	0.0246664	NA
RPL31	0.08730985933637166,0.08832565975624956,0.7644084360555211,0.05995604485185782	0.12377567902735977,0.12685147749955086,0.6736941269375268,0.07567871653556264	0.40307	0.418277	0.448992	0.432561	-0.0534257	4	chr2_101006080_101006132_+@UTR3,chr2_101006258_101006310_+@UTR3,chr2_101006392_101006443_+@UTR3,chr2_101006648_101006700_+@UTR3	0.03655676489232311,0.03860923728720393,-0.0905333415518943,0.015847977764933914	chr2_101006392_101006443_+@UTR3	-0.0905333	1.02e-05	0.00164249	NA
TP53	0.13501231091504393,0.40322724369235324,0.4617604453926028	0.1703799434074645,0.41625194994807657,0.41336810664445883	0.617083	0.590006	0.225328	0.260401	0.0647359	3	chr17_7668440_7668492_-@UTR3,chr17_7669428_7669480_-@UTR3,chr17_7669600_7669652_-@UTR3	0.03533539124601315,0.013025839200063727,-0.04831204721877208	chr17_7669600_7669652_-@UTR3	-0.048312	0.000394346	0.010586	NA
CNOT6L	0.05454674239204626,0.027389921312573243,0.04489562003374158,0.05757704542234929,0.03955749591108707,0.08690260016226868,0.07722829656531315,0.331056420559183,0.2808458576414377	0.06331428752601531,0.06105215663095028,0.1227605323767401,0.07408302170918303,0.08582169730021653,0.10421814609707486,0.05501563349456395,0.22289715810231447,0.21083736676294143	0.320458	0.248428	0.24993	0.276747	0.367305	9	chr4_77714738_77714790_-@UTR3,chr4_77716328_77716380_-@UTR3,chr4_77716752_77716804_-@UTR3,chr4_77717002_77717054_-@UTR3,chr4_77717338_77717390_-@UTR3,chr4_77717844_77717896_-@UTR3,chr4_77718038_77718090_-@UTR3,chr4_77719444_77719496_-@UTR3,chr4_77773122_77773174_-@UTR3	0.007631816135234858,0.032361837583033626,0.07632020677739629,0.015285316543097949,0.04490026073988724,0.016106133934483777,-0.02317310791007087,-0.10826445095630727,-0.07043198581110613	chr4_77719444_77719496_-@UTR3	-0.108264	3.17e-07	0.000188747	NA
SREK1IP1	0.06446862258000273,0.07524920599981133,0.1195542418302709,0.07407349174903655,0.06504163041693307,0.08848428945281246,0.09998986754434695,0.17255222582099097,0.0915956521283398,0.1489907724774553	0.055105494780925406,0.07171649699655307,0.06731578108479369,0.0776725324222614,0.050846403833121015,0.10810754250269805,0.04086135719056953,0.1944883068151539,0.1560337223153005,0.17785236205862348	0.315302	0.332558	0.206278	0.181597	-0.0768741	10	chr5_64718694_64718746_-@UTR3,chr5_64720102_64720154_-@UTR3,chr5_64721428_64721480_-@UTR3,chr5_64721730_64721782_-@UTR3,chr5_64722098_64722150_-@UTR3,chr5_64722516_64722568_-@UTR3,chr5_64723448_64723500_-@UTR3,chr5_64723710_64723762_-@UTR3,chr5_64723876_64723928_-@UTR3,chr5_64724304_64724356_-@UTR3	-0.011394303856896916,-0.005565570654640722,-0.05393780121940579,0.0015090072990278508,-0.016229722813373322,0.017482510321900166,-0.060830682033668405,0.019956959075416503,0.06206370277060157,0.02681691479562956	chr5_64723876_64723928_-@UTR3	0.0620637	0.000264751	0.00865185	NA
KRBA1	0.33005073865388385,0.3503686261318084,0.31958063521430774	0.27153700627537836,0.22973767995570318,0.49872531376891843	0.481376	0.354974	0.322228	0.500525	0.439448	3	chr7_149734256_149734308_+@UTR3,chr7_149734468_149734520_+@UTR3,chr7_149775518_149775570_+@UTR3-EX	-0.05718888978413961,-0.11778499072536677,0.17590763392965275	chr7_149775518_149775570_+@UTR3-EX	0.175908	0.00374188	0.0313539	NA
ONECUT3	0.19857512546724876,0.2771519399434413,0.1853673785810703,0.09758294272261801,0.157034584422283,0.08428802886333862	0.21721309355717958,0.23159345632463912,0.16431131592421913,0.08386114085038816,0.1803886277004557,0.12263236564311832	0.396796	0.373524	0.270013	0.292102	0.0871981	6	chr19_1775812_1775864_+@UTR3,chr19_1776520_1776572_+@UTR3,chr19_1777086_1777138_+@UTR3,chr19_1777992_1778043_+@UTR3,chr19_1779142_1779194_+@UTR3,chr19_1779342_1779394_+@UTR3	0.018740697729731276,-0.045351177212725025,-0.020873045456763495,-0.013543617452396212,0.023454803749857506,0.03842418879232794	chr19_1776520_1776572_+@UTR3	-0.0453512	0.00262797	0.0259857	NA
ZDHHC21	0.11447074155176264,0.045453333466652,0.08991677582132633,0.0836274676452257,0.20445917615728937,0.09440461549229584,0.22129232451097047,0.14637556535447765	0.10620468593890521,0.11410912573703273,0.09648946526022939,0.07187182436351873,0.1546653440341148,0.08910737980505423,0.13047456569051255,0.23707760917063245	0.351005	0.335898	0.230362	0.245555	0.063472	8	chr9_14613536_14613588_-@UTR3,chr9_14613706_14613758_-@UTR3,chr9_14615038_14615090_-@UTR3,chr9_14615824_14615876_-@UTR3,chr9_14617004_14617056_-@UTR3,chr9_14617436_14617488_-@UTR3,chr9_14618186_14618238_-@UTR3,chr9_14618832_14618884_-@UTR3	-0.008732071070858452,0.06733190636052414,0.0058619066324262364,-0.012196014785147147,-0.049740888443310816,-0.005883723878547242,-0.09034307324806029,0.08935255233046441	chr9_14618186_14618238_-@UTR3	-0.0903431	0.000636769	0.013708	NA
MFSD11	0.9433862433862434,0.01851851851851852,0.0380952380952381	0.7772211591033351,0.10661335884818662,0.11616548204847822	0.932436	0.784922	0.047829	0.163003	0.248456	3	chr17_76778546_76778598_+@UTR3,chr17_76783176_76783228_+@UTR3-EX,chr17_76784122_76784174_+@UTR3-EX	-0.1644040866263089,0.06618749074889427,0.05651591441065126	chr17_76778546_76778598_+@UTR3	-0.164404	0.000275359	0.00868789	NA
UBN2	0.14481831667469033,0.053652444095478986,0.078817358930077,0.10856133099755726,0.07489428352551906,0.07270556803680185,0.09470714761493572,0.0900857432964245,0.040152997154785285,0.07321194206918687,0.08461465107275039,0.03033679146639361,0.05344142506539918	0.13558222822928703,0.06234925205513442,0.051917853388441626,0.07259292994587112,0.09662282162282161,0.05177779736603266,0.08434784170078287,0.10349748290924761,0.057183502771738066,0.09853202353202355,0.05814708167649344,0.05419074389662626,0.07325844090549972	0.266821	0.246042	0.199914	0.220344	0.116967	13	chr7_139298224_139298276_+@UTR3,chr7_139299300_139299352_+@UTR3,chr7_139299822_139299874_+@UTR3,chr7_139300160_139300212_+@UTR3,chr7_139301498_139301550_+@UTR3,chr7_139301964_139302016_+@UTR3,chr7_139302254_139302306_+@UTR3,chr7_139303970_139304022_+@UTR3,chr7_139305160_139305212_+@UTR3,chr7_139305774_139305826_+@UTR3,chr7_139306412_139306464_+@UTR3,chr7_139307448_139307500_+@UTR3,chr7_139307778_…	-0.009000329184291306,0.008913498034103427,-0.026561945382901776,-0.03560144672697754,0.021791695276371814,-0.020590396829917777,-0.010073955299590154,0.013581828701308224,0.017175728636828272,0.02538578626663615,-0.026109020267509303,0.023981760233094125,0.019966168837452787	chr7_139300160_139300212_+@UTR3	-0.0356014	0.000468287	0.0115841	NA
LRRC75A	0.7019357482269176,0.2980642517730823	0.7252676831835619,0.274732316816438	0.459409	0.442433	0.753269	0.770245	0.0543216	2	chr17_16441832_16441884_-@UTR3,chr17_16441988_16442040_-@UTR3	0.023305550845928003,-0.023338362451404304	chr17_16441988_16442040_-@UTR3	-0.0233384	0.00358704	0.030602	NA
CRELD2	0.9770410145022109,0.02295898549778909	0.9395015003789885,0.06049849962101153	0.977121	0.939724	0.0266629	0.0640599	0.0563	2	chr22_49927324_49927376_+@UTR3,chr22_49940988_49941040_+@UTR3-EX	-0.03729895733619348,0.0359576101837567	chr22_49927324_49927376_+@UTR3	-0.037299	0.00123317	0.0179478	NA
UBC	0.18998015873015875,0.17872925685425686,0.6312905844155844	0.27789434541605024,0.2654157427243457,0.456689911859604	0.660339	0.509377	0.27749	0.395726	0.374474	3	chr12_124910030_124910082_-@UTR3-EX,chr12_124910272_124910324_-@UTR3-EX,chr12_124911442_124911494_-@UTR3-EX	0.08152351366420493,0.08020152914027995,-0.17621721442218713	chr12_124911442_124911494_-@UTR3-EX	-0.176217	0.00206166	0.02305	NA
PIK3R4	0.2056647115038972,0.7943352884961028	0.3162813226556445,0.6837186773443554	0.816815	0.725003	0.328219	0.420031	0.172022	2	chr3_130678994_130679046_-@UTR3,chr3_130679268_130679320_-@UTR3	0.11372505543237252,-0.10764042867701396	chr3_130678994_130679046_-@UTR3	0.113725	0.00220923	0.0239592	NA
PHLPP2	0.18146453089244852,0.8185354691075514	0.3437314319667261,0.6562685680332739	0.827246	0.67411	0.226023	0.379159	0.295332	2	chr16_71647084_71647136_-@UTR3,chr16_71647980_71648032_-@UTR3	0.15571899324574437,-0.1577325477804581	chr16_71647980_71648032_-@UTR3	-0.157733	0.00220156	0.0239236	NA
ZNHIT6	0.062034914976091454,0.08000877118524177,0.0936423054070113,0.505201171377642,0.25911283705401356	0.08163265306122448,0.11564625850340134,0.1098097209898452,0.4365375135561471,0.25637385388938183	0.487114	0.470882	0.257754	0.275713	0.0488963	5	chr1_85651186_85651238_-@UTR3,chr1_85652322_85652374_-@UTR3,chr1_85652792_85652844_-@UTR3,chr1_85652962_85653014_-@UTR3,chr1_85653870_85653922_-@UTR3	0.02013284830491005,0.036106892851621025,0.01670833972173799,-0.068081462274242,-0.0022675801364003823	chr1_85652962_85653014_-@UTR3	-0.0680815	0.00132437	0.0187116	NA
TTLL9	0.4141666666666666,0.5858333333333333	0.21871070154823014,0.7812892984517698	0.505375	0.344946	0.646277	0.806706	0.550982	2	chr20_31944674_31944726_+@UTR3,chr20_31944932_31944984_+@UTR3	-0.18894073050042237,0.18909695353854528	chr20_31944932_31944984_+@UTR3	0.189097	0.00167354	0.0209858	NA
USP20	0.6061565951916829,0.39384340480831703	0.8101495726495727,0.18985042735042734	0.621833	0.817269	0.418426	0.222991	-0.394283	2	chr9_129880590_129880642_+@UTR3,chr9_129881802_129881854_+@UTR3	0.1957369757939018,-0.19493552737702005	chr9_129880590_129880642_+@UTR3	0.195737	0.000894848	0.0163784	NA
AC231657.3	0.14487315097828343,0.29435057829097566,0.560776270730741	0.168850390397705,0.3621293928199299,0.46902021678236516	0.645921	0.598962	0.338534	0.383706	0.108894	3	chrX_49074462_49074514_-@UTR3,chrX_49074614_49074666_-@UTR3,chrX_49074802_49074854_-@UTR3	0.023796481172274397,0.06730961624284115,-0.09110784778686315	chrX_49074802_49074854_-@UTR3	-0.0911078	0.0022313	0.0239592	NA
VPS26A	0.1742929165904518,0.33205654380830435,0.49365053960124383	0.10301618452687185,0.3610710450946482,0.5359127703784798	0.30034	0.245928	0.600312	0.649179	0.288356	3	chr10_69171440_69171492_+@UTR3,chr10_69172248_69172300_+@UTR3,chr10_69172706_69172758_+@UTR3	-0.07100504409722423,0.028973642261294674,0.042181617446026665	chr10_69171440_69171492_+@UTR3	-0.071005	0.000377501	0.0103926	NA
GPRC5A	0.25669109973203486,0.18656242677867943,0.15323215159422007,0.12633284258446978,0.19945455796234368,0.07772692134825225	0.23767680589961682,0.18378763014961916,0.16368152626838417,0.13058061481399183,0.2004032982971523,0.08387012457123576	0.406138	0.39958	0.244959	0.253236	0.023484	6	chr12_12913510_12913562_+@UTR3,chr12_12913786_12913838_+@UTR3,chr12_12914440_12914492_+@UTR3,chr12_12915994_12916046_+@UTR3,chr12_12916278_12916330_+@UTR3,chr12_12917900_12917952_+@UTR3	-0.01890435440369123,-0.0026628195006523636,0.010561066907247202,0.004365641661664588,0.0010571954149712903,0.00626763714641522	chr12_12913510_12913562_+@UTR3	-0.0189044	0.00307537	0.0280925	NA
PARD6B	0.3493429286748699,0.14470253987876772,0.12089764809407323,0.2179346526981693,0.08675090617741055,0.08037132447670925	0.35199713914860353,0.14167346482900703,0.13423155557147118,0.17902792461788897,0.11591457667253596,0.07715533916049336	0.423127	0.422878	0.267434	0.267622	0.000848981	6	chr20_50750684_50750736_+@UTR3,chr20_50751294_50751346_+@UTR3,chr20_50752272_50752324_+@UTR3,chr20_50752570_50752622_+@UTR3,chr20_50752824_50752876_+@UTR3,chr20_50753038_50753090_+@UTR3	0.002810239227338418,-0.0028196961679778365,0.013530096280353399,-0.03868088152635121,0.029350066448983067,-0.002993457071702399	chr20_50752570_50752622_+@UTR3	-0.0386809	0.00201334	0.02273	NA
YPEL5	0.3595909891952975,0.34003119893771494,0.15457613765273398,0.14580167421425347	0.40909404145686334,0.3342913152543612,0.11206195819857634,0.1445526850901991	0.520853	0.537604	0.274136	0.253959	-0.0456688	4	chr2_30158936_30158988_+@UTR3,chr2_30159132_30159184_+@UTR3,chr2_30159522_30159574_+@UTR3,chr2_30160058_30160110_+@UTR3	0.049554225184866685,-0.005564737300013889,-0.04222931589717306,-0.0010455915395803095	chr2_30158936_30158988_+@UTR3	0.0495542	0.000454433	0.0114191	NA
METTL14	0.20169835912380035,0.2107121119902617,0.3114157398697873,0.1467290064368579,0.12944478257929262	0.23327251596963736,0.19408188807437868,0.18620678445459424,0.2621113242202103,0.12432748728117941	0.260454	0.281367	0.394141	0.382903	-0.111423	5	chr4_118703914_118703966_+@UTR3,chr4_118710352_118710404_+@UTR3,chr4_118710604_118710656_+@UTR3,chr4_118711070_118711122_+@UTR3,chr4_118711252_118711304_+@UTR3	0.031472622165697434,-0.01622164318819766,-0.1239230941852105,0.11470580625043178,-0.004823947059218792	chr4_118710604_118710656_+@UTR3	-0.123923	0.000113813	0.00590702	NA
FOXJ3	0.16137315141110206,0.8386268485888979	0.2648438122839845,0.7351561877160155	0.841442	0.739885	0.176709	0.278267	0.185564	2	chr1_42176524_42176576_-@UTR3,chr1_42179310_42179362_-@UTR3	0.10275109507629729,-0.1013277084672698	chr1_42176524_42176576_-@UTR3	0.102751	0.00189697	0.022155	NA
IRF2BPL	0.2514172048696353,0.20559497608559055,0.5429878190447742	0.28876167691957166,0.23060017467912206,0.48063814840130625	0.594584	0.55167	0.35613	0.396858	0.108075	3	chr14_77024616_77024668_-@UTR3,chr14_77024888_77024940_-@UTR3,chr14_77025246_77025298_-@UTR3	0.037477260492896625,0.025169429608076138,-0.062121922559336906	chr14_77025246_77025298_-@UTR3	-0.0621219	0.00195651	0.0225091	NA
CINP	0.335799859055673,0.2918722104768616,0.26673713883016203,0.10559079163730327	0.3991608391608392,0.4249106449106449,0.11442113442113444,0.06150738150738152	0.355365	0.295129	0.479239	0.553712	0.267955	4	chr14_102341272_102341324_-@UTR3,chr14_102342014_102342066_-@UTR3,chr14_102342296_102342348_-@UTR3,chr14_102342592_102342644_-@UTR3	0.06228821471147489,0.13113509428361114,-0.15033313792787237,-0.04369367449016186	chr14_102342296_102342348_-@UTR3	-0.150333	0.00832914	0.0492636	NA
TBC1D4	0.6944444444444445,0.3055555555555556	0.45886939571150104,0.541130604288499	0.333449	0.559283	0.706258	0.480423	-0.746112	2	chr13_75285092_75285144_-@UTR3,chr13_75286322_75286374_-@UTR3	-0.22605600539811077,0.2164844804318488	chr13_75285092_75285144_-@UTR3	-0.226056	0.00103618	0.0169531	NA
AKT2	0.11348653806912606,0.1259477326824198,0.7605657292484541	0.16213643667661803,0.14775951755969577,0.6901040457636862	0.77735	0.717998	0.224787	0.270273	0.114586	3	chr19_40232308_40232359_-@UTR3,chr19_40232368_40232420_-@UTR3,chr19_40232776_40232828_-@UTR3	0.04863369227848849,0.021808177396430817,-0.0704272084164187	chr19_40232776_40232828_-@UTR3	-0.0704272	7.88e-05	0.00468341	NA
UHRF1BP1	0.14149101320636667,0.10326306049866088,0.09678899044126255,0.10279226380334675,0.14901249232396627,0.09000079237585995,0.09712571017591765,0.06827733883380892,0.05540430296375729,0.09584403537705319	0.11527276699942203,0.10697620952538599,0.13648942477227646,0.11838511552215386,0.14240686108160047,0.10370544075678292,0.09913103124050597,0.048437772016523814,0.04559619941496655,0.08359917867038183	0.288863	0.298968	0.233673	0.223886	-0.0496084	10	chr6_34872680_34872732_+@UTR3,chr6_34873110_34873162_+@UTR3,chr6_34873428_34873480_+@UTR3,chr6_34873820_34873872_+@UTR3,chr6_34874782_34874833_+@UTR3,chr6_34875822_34875874_+@UTR3,chr6_34876190_34876242_+@UTR3,chr6_34876558_34876610_+@UTR3,chr6_34876980_34877032_+@UTR3,chr6_34877352_34877404_+@UTR3	-0.02601476338814325,0.003871307487059633,0.03980121772508999,0.015729808906004714,-0.006432996378627681,0.013851172380451776,0.002169047701554433,-0.019632991749583627,-0.009616860798291736,-0.01205404419248833	chr6_34873428_34873480_+@UTR3	0.0398012	8.3e-05	0.0048165	NA
FBXO44	0.890975788701394,0.10902421129860602	0.7946393762183236,0.2053606237816764	0.895147	0.803493	0.151203	0.242857	0.155839	2	chr1_11662256_11662308_+@UTR3,chr1_11663298_11663350_+@UTR3	-0.09529658864351287,0.09131116698456676	chr1_11662256_11662308_+@UTR3	-0.0952966	0.00116825	0.0177317	NA
NKX6-2	0.9642738740831621,0.035726125916837874	0.9073249303862075,0.09267506961379246	0.0654706	0.120635	0.964917	0.909753	-0.881726	2	chr10_132783158_132783210_-@UTR3,chr10_132784790_132784842_-@UTR3	-0.05640713247394358,0.056393390087017374	chr10_132783158_132783210_-@UTR3	-0.0564071	0.000475161	0.0116745	NA
SMYD2	0.8377891185927652,0.1622108814072349	0.7680499325236166,0.23195006747638328	0.853337	0.797716	0.314522	0.370143	0.097241	2	chr1_214336810_214336862_+@UTR3,chr1_214337034_214337086_+@UTR3	-0.0687606773994951,0.07036294512850355	chr1_214337034_214337086_+@UTR3	0.0703629	0.00511388	0.0372892	NA
RPS19	0.9779718022052316,0.022028197794768372	0.9287475316200959,0.07125246837990411	0.978169	0.930581	0.053992	0.101581	0.0719528	2	chr19_41871390_41871441_+@UTR3,chr19_41872898_41872949_+@UTR3	-0.04915609137778798,0.048917583774731085	chr19_41871390_41871441_+@UTR3	-0.0491561	2.04e-07	0.000164414	NA
BIRC6	0.5884795578413173,0.29819047080799166,0.113329971350691	0.4419327156156088,0.3755127295985761,0.18255455478581495	0.664538	0.590077	0.293572	0.373127	0.171449	3	chr2_32618002_32618054_+@UTR3,chr2_32618158_32618210_+@UTR3,chr2_32618382_32618434_+@UTR3	-0.14584216868592126,0.07663343498149289,0.06846781636820119	chr2_32618002_32618054_+@UTR3	-0.145842	0.00109118	0.017306	NA
CCNG2	0.29112181823704514,0.3647484964461454,0.24222973999149502,0.10189994532531438	0.1481687242798354,0.4183539094650206,0.2486831275720164,0.18479423868312758	0.410502	0.290854	0.389876	0.472155	0.497095	4	chr4_77164906_77164958_+@UTR3,chr4_77166460_77166512_+@UTR3,chr4_77166706_77166758_+@UTR3,chr4_77166986_77167038_+@UTR3	-0.14005914782753737,0.0538129429607383,0.007524948750601557,0.0831872473731763	chr4_77164906_77164958_+@UTR3	-0.140059	0.00295653	0.0273896	NA
PRR3	0.20661387193645261,0.30792163130872807,0.48546449675481934	0.1980556067777163,0.22262175507611612,0.5793226381461675	0.37694	0.327926	0.578527	0.633922	0.200963	3	chr6_30562768_30562820_+@UTR3,chr6_30562964_30563016_+@UTR3,chr6_30563348_30563400_+@UTR3	-0.008026591905799546,-0.08405705791837861,0.09319056272846932	chr6_30563348_30563400_+@UTR3	0.0931906	0.00755852	0.0463095	NA
DNAJC27	0.41534391534391535,0.21693121693121695,0.36772486772486773	0.2118541181041181,0.2082604895104895,0.5798853923853924	0.420606	0.61819	0.468474	0.299644	-0.555582	3	chr2_24943746_24943798_-@UTR3,chr2_24944864_24944916_-@UTR3,chr2_24947502_24947554_-@UTR3	-0.21224476536476108,-0.026363857427698534,0.19256448330858494	chr2_24943746_24943798_-@UTR3	-0.212245	0.00505487	0.0370693	NA
MRPS16	0.05957342779217057,0.18493472151484833,0.16289160851173481,0.18783925791090716,0.12711258239958492,0.2776484018707542	0.06581477523325469,0.19882861333399457,0.15947574102953865,0.19854470915956876,0.14052608792360788,0.23681007332003554	0.392161	0.376449	0.291141	0.30552	0.058994	6	chr10_73248822_73248874_-@UTR3,chr10_73249184_73249236_-@UTR3,chr10_73249444_73249496_-@UTR3,chr10_73249634_73249686_-@UTR3,chr10_73250426_73250478_-@UTR3,chr10_73250714_73250766_-@UTR3	0.006228160323614319,0.013876144870256901,-0.003420958515373357,0.010689366280708101,0.013393610857243249,-0.040812893056516225	chr10_73250714_73250766_-@UTR3	-0.0408129	0.000141799	0.006455	NA
UBTD2	0.09628021884595765,0.14532167983346678,0.08923308105228413,0.2844534632974679,0.0626114159412073,0.3221001410296162	0.08006342062193127,0.0908212207414335,0.07549310913672615,0.3137093107837789,0.08810855220429688,0.35180438651183327	0.397996	0.436502	0.271357	0.235509	-0.133232	6	chr5_172209696_172209748_-@UTR3,chr5_172209924_172209976_-@UTR3,chr5_172210188_172210240_-@UTR3,chr5_172210800_172210852_-@UTR3,chr5_172211370_172211422_-@UTR3,chr5_172211608_172211660_-@UTR3	-0.016145094058974283,-0.05434312202942988,-0.013675156057913529,0.029207745229792692,0.025454881621245637,0.029622286814331544	chr5_172209924_172209976_-@UTR3	-0.0543431	0.000292556	0.00892401	NA
UBASH3B	0.2887167213374595,0.17985564508569968,0.14615840926400403,0.10277294065914115,0.17367390435102828,0.05072654106177168,0.058095838240895425	0.2980153827842695,0.1607247798642929,0.14337384121864002,0.135275698014113,0.13454607498094612,0.060331039892563214,0.06773318324517533	0.407505	0.405054	0.250765	0.252501	0.00870234	7	chr11_122809876_122809928_+@UTR3,chr11_122810974_122811026_+@UTR3,chr11_122811792_122811844_+@UTR3,chr11_122812382_122812434_+@UTR3,chr11_122812610_122812662_+@UTR3,chr11_122813052_122813104_+@UTR3,chr11_122813256_122813308_+@UTR3	0.009378502397371313,-0.01897324784835744,-0.002645457236478743,0.03254949213570403,-0.0389139111711988,0.009722757819782067,0.009760921684320752	chr11_122812610_122812662_+@UTR3	-0.0389139	0.00664627	0.0435947	NA
MINPP1	0.9713345864661654,0.028665413533834585	0.9137712827273193,0.08622871727268076	0.963229	0.91571	0.185042	0.232562	0.0729885	2	chr10_87553046_87553098_+@UTR3,chr10_87553312_87553364_+@UTR3	-0.05680961134736662,0.056723334067492505	chr10_87553046_87553098_+@UTR3	-0.0568096	0.000478789	0.0117239	NA
POGK	0.0799271826925285,0.11237685461799096,0.067699678710332,0.0577200750719718,0.2944956127989779,0.16182373117720616,0.22595686493099268	0.07952085972497613,0.12459560544723507,0.08108731847139605,0.09613244818058309,0.2858589561761034,0.15365108297532495,0.1791537290243813	0.213956	0.233461	0.397018	0.379755	-0.125873	7	chr1_166851000_166851052_+@UTR3,chr1_166851462_166851514_+@UTR3,chr1_166851712_166851764_+@UTR3,chr1_166852512_166852564_+@UTR3,chr1_166852882_166852934_+@UTR3,chr1_166853238_166853290_+@UTR3,chr1_166853406_166853458_+@UTR3	-0.0005084053327950311,0.012095956492885335,0.013258059175720094,0.03823459813973702,-0.008698588937971707,-0.008245192766760973,-0.04679102605199964	chr1_166853406_166853458_+@UTR3	-0.046791	0.00225991	0.0241235	NA
CASKIN1	0.4151748985260065,0.48542084657145684,0.0994042549025367	0.37217581952307377,0.5519965108608383,0.07582766961608796	0.290874	0.290764	0.618957	0.619055	0.000546054	3	chr16_2177156_2177208_-@UTR3,chr16_2177454_2177506_-@UTR3,chr16_2178002_2178054_-@UTR3	-0.04301793112643287,0.06629041506834443,-0.023722762132476913	chr16_2177454_2177506_-@UTR3	0.0662904	0.000504662	0.0119536	NA
EIF1	0.7635990021289313,0.23640099787106883	0.7821499593770045,0.2178500406229955	0.779934	0.796956	0.296181	0.279158	-0.0311485	2	chr17_41690928_41690980_+@UTR3,chr17_41691530_41691582_+@UTR3	0.018541556411188265,-0.018536332405403866	chr17_41690928_41690980_+@UTR3	0.0185416	0.00211177	0.0234396	NA
DKK3	0.14993370536796116,0.06988114855305763,0.09080599040372218,0.23047848107400767,0.25170842824601364,0.20719224635523767	0.11832236391059921,0.04089880707527766,0.10389071712601124,0.23789935554641436,0.2793946249828602,0.21959413135883724	0.39579	0.425665	0.197237	0.158431	-0.104983	6	chr11_11956694_11956746_-@UTR3,chr11_11956862_11956914_-@UTR3,chr11_11963170_11963222_-@UTR3,chr11_11963548_11963600_-@UTR3,chr11_11963906_11963958_-@UTR3,chr11_11964398_11964450_-@UTR3	-0.03223098808579021,-0.029679227496710793,0.012342988739600602,0.006807117821179848,0.027054225862108594,0.011748761903242921	chr11_11956694_11956746_-@UTR3	-0.032231	0.00553834	0.0393162	NA
AL139288.1	0.33021442495126707,0.669785575048733	0.6455555555555555,0.3544444444444444	0.359628	0.660656	0.683787	0.382758	-0.877396	2	chr1_228419212_228419264_+@UTR3-EX,chr1_228420330_228420382_+@UTR3-EX	0.2802156177156177,-0.3012237762237762	chr1_228420330_228420382_+@UTR3-EX	-0.301224	0.000760972	0.0150287	NA
GATA3	0.906580811869634,0.09341918813036594	0.7322695035460992,0.26773049645390073	0.911167	0.759823	0.205145	0.35649	0.262053	2	chr10_8074410_8074462_+@UTR3,chr10_8074774_8074826_+@UTR3	-0.1704923383494812,0.1721191506905792	chr10_8074774_8074826_+@UTR3	0.172119	7.71e-06	0.0015513	NA
ANKS6	0.25896057347670254,0.21448567479560524,0.29285262492093606,0.23370112680675614	0.2090267756934424,0.1680295013628347,0.27058682058682054,0.3523569023569023	0.422136	0.476749	0.368238	0.301752	-0.17552	4	chr9_98733202_98733254_-@UTR3,chr9_98734356_98734408_-@UTR3,chr9_98735462_98735514_-@UTR3,chr9_98735784_98735836_-@UTR3	-0.04966290923821595,-0.04627344492200658,-0.022275021228522596,0.11738566228170796	chr9_98735784_98735836_-@UTR3	0.117386	0.00328211	0.0290816	NA
LTO1	0.8626556812989112,0.07995843439136702,0.05738588430972171	0.8083741865720132,0.10950928835355388,0.08211652507443291	0.0987722	0.136878	0.866303	0.814257	-0.470709	3	chr11_69653044_69653096_-@UTR3,chr11_69666634_69666686_-@UTR3,chr11_69667582_69667634_-@UTR3	-0.054081307034862025,0.029730683513639486,0.02494368470923792	chr11_69653044_69653096_-@UTR3	-0.0540813	0.000957158	0.0166366	NA
PPARA	0.1016273885126344,0.10331978013476843,0.12498957639472862,0.12956189712629992,0.11148485387361266,0.0964032784875876,0.14990877461603455,0.1300845844171371,0.05261986643719665	0.12346439809470348,0.15886546076674754,0.09628651015245987,0.15510619802918632,0.1252818303903382,0.11926428989997263,0.0968980659781505,0.07834374830725899,0.046489498381182666	0.285561	0.325565	0.231636	0.179212	-0.189145	9	chr22_46235694_46235746_+@UTR3,chr22_46235856_46235908_+@UTR3,chr22_46236258_46236310_+@UTR3,chr22_46236626_46236678_+@UTR3,chr22_46236958_46237010_+@UTR3,chr22_46237724_46237776_+@UTR3,chr22_46241294_46241346_+@UTR3,chr22_46242342_46242394_+@UTR3,chr22_46242552_46242604_+@UTR3	0.02240539933546913,0.0558477091714495,-0.027787948321173747,0.026054715963831854,0.014433967370599335,0.023441115394094672,-0.05193242825256324,-0.05063190412140099,-0.0053278312285101465	chr22_46235856_46235908_+@UTR3	0.0558477	0.000531402	0.0122273	NA
GNS	0.2399230621088205,0.20490778234199625,0.25098854071798055,0.3041806148312027	0.22283048910817294,0.2221844942761316,0.22587990809780314,0.32910510851789226	0.447762	0.457876	0.360326	0.348136	-0.0322247	4	chr12_64714826_64714878_-@UTR3,chr12_64715726_64715778_-@UTR3,chr12_64716176_64716228_-@UTR3,chr12_64716562_64716614_-@UTR3	-0.017113769855857636,0.017217178210964162,-0.025120969834064172,0.02486179979923203	chr12_64716176_64716228_-@UTR3	-0.025121	0.00752893	0.0462907	NA
DCAF16	0.12996435753788696,0.11158963585434174,0.13443762120232708,0.2768898585075056,0.34711852689793865	0.13242893706529285,0.21029953453212877,0.13311193824436857,0.2561913800115853,0.2679682101466244	0.469504	0.430335	0.22807	0.278457	0.125679	5	chr4_17800972_17801024_-@UTR3,chr4_17801590_17801642_-@UTR3,chr4_17802234_17802286_-@UTR3,chr4_17802578_17802630_-@UTR3,chr4_17802714_17802766_-@UTR3	0.0023458655007909113,0.09803632931364835,-0.001439217143361593,-0.02071331807619159,-0.07881031860952825	chr4_17801590_17801642_-@UTR3	0.0980363	0.00174878	0.0214559	NA
VCPKMT	0.07693744164332399,0.45154061624649855,0.47152194211017734	0.3235294117647059,0.30718954248366015,0.369281045751634	0.57827	0.456778	0.363192	0.462237	0.340251	3	chr14_50108612_50108664_-@UTR3,chr14_50108784_50108836_-@UTR3,chr14_50109372_50109424_-@UTR3	0.24005593889314814,-0.14192624774020118,-0.1002839537723259	chr14_50108612_50108664_-@UTR3	0.240056	1.25e-05	0.00193179	NA
KRR1	0.05870030582655595,0.07418177924831586,0.09405556055245001,0.07519010403015833,0.12471330581184331,0.18223942895237688,0.06822444867710538,0.1421961057999695,0.1804989611012249	0.06475818213460874,0.0806433246444921,0.08759376090433892,0.062172614498344075,0.11257396941309729,0.20157976736916908,0.06758090067629428,0.15555222173946384,0.16754525862019176	0.342992	0.342002	0.206054	0.207545	0.00417019	9	chr12_75494886_75494938_-@UTR3,chr12_75496956_75497008_-@UTR3,chr12_75497374_75497426_-@UTR3,chr12_75497622_75497674_-@UTR3,chr12_75498120_75498172_-@UTR3,chr12_75498704_75498756_-@UTR3,chr12_75498988_75499040_-@UTR3,chr12_75499274_75499326_-@UTR3,chr12_75499702_75499754_-@UTR3	0.005960221440725062,0.006365396931672235,-0.006546529174725674,-0.01309857318847342,-0.012216580705350241,0.01924756811892206,-0.0007346093503347584,0.01326149688396469,-0.013024694813537269	chr12_75498704_75498756_-@UTR3	0.0192476	0.00100316	0.0168699	NA
TULP4	0.22063217626457418,0.2220958187975078,0.07055686846882483,0.16819112379692244,0.19766812962716673,0.12085588304500393	0.2055460828164513,0.2722148087742276,0.04527886920206589,0.15975650941919756,0.17406281661600811,0.14314091317204966	0.338295	0.346281	0.30589	0.298921	-0.0336618	6	chr6_158507206_158507258_+@UTR3,chr6_158507688_158507740_+@UTR3,chr6_158508846_158508898_+@UTR3,chr6_158510602_158510654_+@UTR3,chr6_158511066_158511118_+@UTR3,chr6_158511216_158511268_+@UTR3	-0.014675519687714966,0.05029662644515076,-0.024770504726999043,-0.008011964855729498,-0.02315119204162064,0.022634100536420204	chr6_158507688_158507740_+@UTR3	0.0502966	0.00778562	0.0473011	NA
NAA50	0.11705970824568925,0.12788662569811157,0.13003723738447567,0.16174129123583006,0.1624938698983582,0.12310591527421506,0.17767535226332018	0.1245127970816069,0.12354146644343467,0.12466914277236041,0.17076420192074104,0.1413191133791736,0.12445589201501576,0.19073738638766766	0.347395	0.347851	0.281476	0.280944	-0.00189113	7	chr3_113719434_113719486_-@UTR3,chr3_113719810_113719862_-@UTR3,chr3_113720532_113720584_-@UTR3,chr3_113720942_113720994_-@UTR3,chr3_113721168_113721220_-@UTR3,chr3_113721364_113721416_-@UTR3,chr3_113721722_113721774_-@UTR3	0.007484249711860069,-0.004309183760159596,-0.005330827884645978,0.009051762514404899,-0.021132357058475493,0.0013839254892139968,0.013087913689516228	chr3_113721168_113721220_-@UTR3	-0.0211324	0.0075416	0.0462907	NA
RPL4	0.03026999701625929,0.9697300029837407	0.05746450052005606,0.942535499479944	0.966023	0.942402	0.147769	0.171461	0.035714	2	chr15_66498934_66498986_-@UTR3,chr15_66499300_66499351_-@UTR3	0.02713886878281114,-0.027154128185092885	chr15_66499300_66499351_-@UTR3	-0.0271541	6.48e-05	0.00427173	NA
ALG9	0.12086042012281763,0.13123758144179368,0.07258533880802161,0.0482355306107935,0.09041907780820883,0.09822762046999299,0.11691950089188652,0.04993548518191147,0.2715794446645738	0.06296243292769187,0.11953181801732449,0.1096567126042753,0.05635115677456357,0.08726062053605209,0.12113837320112425,0.08360639288334436,0.07874834546748564,0.2807441475881385	0.311347	0.324861	0.259419	0.254102	-0.0613014	9	chr11_111782288_111782340_-@UTR3,chr11_111782510_111782562_-@UTR3,chr11_111783690_111783742_-@UTR3,chr11_111783930_111783982_-@UTR3,chr11_111784982_111785034_-@UTR3,chr11_111785336_111785388_-@UTR3,chr11_111785494_111785546_-@UTR3,chr11_111786258_111786310_-@UTR3,chr11_111809650_111809702_-@UTR3	-0.05669199150941233,-0.01082121684382957,0.03772516789163295,0.008940539703936087,-0.0022997008205231234,0.023591087949747083,-0.03233021250670132,0.029518963081608993,0.00971850442824107	chr11_111782288_111782340_-@UTR3	-0.056692	0.00139446	0.0192515	NA
ZNF276	0.4883205329777221,0.38983691093897627,0.12184255608330156	0.31262479871175525,0.4201932367149759,0.2671819645732689	0.535933	0.366463	0.349867	0.478702	0.548386	3	chr16_89729242_89729294_+@UTR3,chr16_89738460_89738512_+@UTR3,chr16_89739818_89739870_+@UTR3	-0.1727059977059977,0.030743330743330688,0.14393825129119242	chr16_89729242_89729294_+@UTR3	-0.172706	0.000512879	0.0120693	NA
GSPT1	0.09595168390562266,0.1429777951842965,0.09005868531098231,0.10655844780536979,0.0663729399993631,0.13065972373320475,0.07425922674708345,0.12363930291894315,0.1695221943951343	0.08164506579765665,0.12174096126671768,0.0887678676037693,0.12731890462595644,0.0723116880773056,0.1467552553497331,0.06864185725037546,0.1590780548145525,0.13374034521393321	0.304191	0.309726	0.250449	0.243661	-0.0260119	9	chr16_11868990_11869042_-@UTR3,chr16_11869960_11870012_-@UTR3,chr16_11870118_11870170_-@UTR3,chr16_11870590_11870642_-@UTR3,chr16_11871014_11871066_-@UTR3,chr16_11871758_11871810_-@UTR3,chr16_11872298_11872350_-@UTR3,chr16_11872460_11872512_-@UTR3,chr16_11872654_11872706_-@UTR3	-0.01421939171685864,-0.021150557721583294,-0.0012341192558686515,0.020787858214330837,0.00598404100266875,0.01611647619984341,-0.005545460329920468,0.035436918410570714,-0.03567056194151133	chr16_11872654_11872706_-@UTR3	-0.0356706	0.000998408	0.016829	NA
PLCD3	0.06714322108828247,0.2387597596247509,0.6940970192869668	0.16309825005270925,0.2591134303183639,0.5777883196289268	0.680567	0.60757	0.111535	0.207491	0.163686	3	chr17_45108938_45108990_-@UTR3,chr17_45111640_45111692_-@UTR3,chr17_45112038_45112090_-@UTR3	0.09080335608971485,0.016916651507516367,-0.11625500718022053	chr17_45112038_45112090_-@UTR3	-0.116255	0.00787913	0.04759	NA
GPR107	0.14480254662022565,0.17899176109886775,0.17417580729406704,0.1361778165096443,0.14162826532445852,0.09615640225650364,0.12806740089623303	0.15119938705259922,0.2210262509040192,0.14946802402944936,0.10965292074807982,0.1374907630276113,0.0966508179767875,0.1345118362614538	0.355229	0.361217	0.275372	0.267364	-0.0241179	7	chr9_130135872_130135924_+@UTR3,chr9_130136086_130136138_+@UTR3,chr9_130137010_130137062_+@UTR3,chr9_130137596_130137648_+@UTR3,chr9_130137842_130137894_+@UTR3,chr9_130138194_130138246_+@UTR3,chr9_130140006_130140057_+@UTR3	0.0063407886215440246,0.041924228873261554,-0.024707239640161832,-0.026527316280565802,-0.004174095118120447,0.0004455115441939078,0.006388422501178326	chr9_130136086_130136138_+@UTR3	0.0419242	0.00287887	0.0268892	NA
OAS2	0.4132303732303732,0.30326898326898327,0.28350064350064347	0.3209805427547363,0.47440820827917607,0.20461124896608765	0.520335	0.559125	0.35187	0.301631	-0.10373	3	chr12_113010076_113010128_+@UTR3,chr12_113010242_113010294_+@UTR3,chr12_113011196_113011248_+@UTR3	-0.09165201510457255,0.16671961028428783,-0.07844624539861753	chr12_113010242_113010294_+@UTR3	0.16672	0.00296645	0.0273896	NA
C10orf88	0.045264207377866406,0.19636487363306906,0.38370285967494344,0.3746680593141211	0.1367329445439378,0.22187629150020663,0.2760205721632915,0.365370191792564	0.56296	0.508779	0.252552	0.31001	0.145993	4	chr10_122930890_122930942_-@UTR3,chr10_122931482_122931534_-@UTR3,chr10_122931880_122931932_-@UTR3,chr10_122932338_122932390_-@UTR3	0.09111245615996202,0.025722283825254738,-0.1063466480948419,-0.00884220282143322	chr10_122931880_122931932_-@UTR3	-0.106347	0.00517203	0.0374869	NA
RHOF	0.27507301156554886,0.576275117916909,0.14865187051754217	0.24407212507680154,0.6400131580626428,0.1159147168605557	0.399965	0.399449	0.507697	0.508214	0.00186094	3	chr12_121777740_121777792_-@UTR3,chr12_121779130_121779182_-@UTR3,chr12_121780496_121780548_-@UTR3	-0.03140593660462823,0.06327050161516745,-0.03322218319144314	chr12_121779130_121779182_-@UTR3	0.0632705	0.00394618	0.0324086	NA
MRPS30	0.7240345555496425,0.07830433008709843,0.09971972398133859,0.09794139038192042	0.6268153546475335,0.09986048750404247,0.1423372166191597,0.13098694122926427	0.731425	0.637827	0.162793	0.218791	0.197545	4	chr5_44815234_44815286_+@UTR3,chr5_44821962_44822014_+@UTR3-EX,chr5_44822298_44822350_+@UTR3-EX,chr5_44822480_44822532_+@UTR3-EX	-0.09680537086133945,0.019506049311095855,0.040476519947862374,0.030932367660310975	chr5_44815234_44815286_+@UTR3	-0.0968054	0.00649439	0.0430268	NA
NEMF	0.03649892132259059,0.06397217452560207,0.06119843261568265,0.26046757363624357,0.5778628978998811	0.07734672234418918,0.1330601906392222,0.07217437364482723,0.26079995406174855,0.4566187593100129	0.581625	0.513511	0.118856	0.191911	0.179695	5	chr14_49782058_49782110_-@UTR3,chr14_49782480_49782532_-@UTR3,chr14_49783494_49783546_-@UTR3,chr14_49784210_49784262_-@UTR3,chr14_49784500_49784552_-@UTR3	0.03881386490878298,0.06679616141784835,0.009290282028709879,-0.0009679430958597357,-0.12061413860288739	chr14_49784500_49784552_-@UTR3	-0.120614	0.000801517	0.0153789	NA
ARHGEF2	0.09956202899880418,0.484822458969778,0.41561551203141794	0.10766270766270766,0.5421060421060421,0.35023125023125024	0.522545	0.472943	0.413263	0.452283	0.14389	3	chr1_155946824_155946875_-@UTR3,chr1_155946926_155946978_-@UTR3,chr1_155947420_155947472_-@UTR3	0.008252694026617935,0.05719777054922354,-0.06507840606108628	chr1_155947420_155947472_-@UTR3	-0.0650784	0.000235402	0.0082825	NA
HBEGF	0.18835978835978837,0.8116402116402117	0.44804318488529016,0.55195681511471	0.820976	0.576361	0.233862	0.478477	0.510368	2	chr5_140332830_140332882_-@UTR3,chr5_140333698_140333750_-@UTR3	0.21666666666666667,-0.2482142857142856	chr5_140333698_140333750_-@UTR3	-0.248214	0.00377947	0.0315057	NA
HJURP	0.15140249478824871,0.8485975052117514	0.08889265536723163,0.9111073446327683	0.856821	0.915012	0.207801	0.149611	-0.094796	2	chr2_233836816_233836868_-@UTR3,chr2_233837540_233837592_-@UTR3	-0.06328398725348837,0.061869400727528334	chr2_233836816_233836868_-@UTR3	-0.063284	0.000784987	0.0152536	NA
CCDC32	0.12175056422333431,0.0988381905602983,0.08310927942956205,0.033056618585026,0.09246001373761163,0.08789716416445882,0.4828881692997089	0.12464212577290894,0.03737466117926185,0.07287213949142096,0.10517028848639083,0.04045884115023427,0.06361877116594097,0.5558631727538422	0.503507	0.555259	0.215008	0.185379	-0.141149	7	chr15_40531934_40531986_-@UTR3,chr15_40534796_40534848_-@UTR3,chr15_40535682_40535734_-@UTR3,chr15_40537558_40537610_-@UTR3,chr15_40538218_40538270_-@UTR3,chr15_40538682_40538734_-@UTR3,chr15_40553592_40553644_-@UTR3	0.0013716183053581188,-0.06227076642548935,-0.011527715754737156,0.06967762706479058,-0.052893000924617184,-0.025376615472363223,0.07148079284594017	chr15_40553592_40553644_-@UTR3	0.0714808	0.000897786	0.0163908	NA
KBTBD2	0.06140130034508882,0.13889406809541055,0.27985924965590997,0.5198453819035905	0.05969206995326398,0.15795220168573987,0.21010200778638008,0.5722537205746161	0.587734	0.600812	0.199158	0.183651	-0.0317515	4	chr7_32867350_32867402_-@UTR3-EX,chr7_32869044_32869096_-@UTR3,chr7_32869200_32869252_-@UTR3,chr7_32870158_32870210_-@UTR3	-0.0018576703655141386,0.01884909105053284,-0.06962669030126531,0.05214661618324634	chr7_32869200_32869252_-@UTR3	-0.0696267	0.00188262	0.022155	NA
PCYOX1	0.1935138972263745,0.15922762970283585,0.12035660129479205,0.16948135390946947,0.10992282332350078,0.08379451453919778,0.10551506261825906,0.058188117385570476	0.1662156793759094,0.11802663704816883,0.14013818435058265,0.1649008276781122,0.15529613249448124,0.07787019452855848,0.10779956964769631,0.06975277487649081	0.35773	0.339095	0.218897	0.240171	0.07718	8	chr2_70277110_70277162_+@UTR3,chr2_70277444_70277496_+@UTR3,chr2_70277754_70277806_+@UTR3,chr2_70277960_70278012_+@UTR3,chr2_70279184_70279236_+@UTR3,chr2_70279410_70279462_+@UTR3,chr2_70280092_70280144_+@UTR3,chr2_70280638_70280690_+@UTR3	-0.027309480511130968,-0.04118857649469336,0.019690389394432933,-0.004631519946748208,0.045234253651564055,-0.00597480371734703,0.0022193178686067266,0.01148150340436848	chr2_70279184_70279236_+@UTR3	0.0452343	1.64e-06	0.000658606	NA
MSN	0.5559136796771139,0.44408632032288614	0.5987355215257676,0.40126447847423236	0.568424	0.61	0.45985	0.418275	-0.101841	2	chrX_65740076_65740128_+@UTR3,chrX_65741836_65741888_+@UTR3	0.04267112536803186,-0.04285745530919388	chrX_65741836_65741888_+@UTR3	-0.0428575	0.00130099	0.0185257	NA
GPI	0.45193639943562447,0.3173064960503489,0.23075710451402653	0.394751250251335,0.31411023247442166,0.2911385172742434	0.564455	0.517437	0.383968	0.431613	0.125473	3	chr19_34400024_34400076_+@UTR3,chr19_34400302_34400354_+@UTR3,chr19_34400600_34400652_+@UTR3	-0.05710050379716286,-0.0031681109523690187,0.060335725846593996	chr19_34400600_34400652_+@UTR3	0.0603357	0.00690474	0.0444849	NA
PEX2	0.03901730299992913,0.2675394101388087,0.6934432868612621	0.1546968374746748,0.2899398318967497,0.5553633306285755	0.684451	0.601714	0.0569881	0.172092	0.18587	3	chr8_76978108_76978160_-@UTR3-EX,chr8_76983044_76983096_-@UTR3,chr8_76983204_76983256_-@UTR3	0.11647184721515794,0.023637087396335632,-0.13506771097662917	chr8_76983204_76983256_-@UTR3	-0.135068	0.000669615	0.014175	NA
WDR82	0.09128830043306706,0.17577551118314974,0.13380795805749035,0.06207910735944841,0.13431083534367494,0.2054112749351876,0.19732701268798192	0.08049354572811106,0.20187480620727327,0.13954978360837544,0.0690279246603603,0.14957118104260078,0.17868414841118674,0.18079861034209235	0.365307	0.358246	0.261158	0.270387	0.0281588	7	chr3_52254526_52254578_-@UTR3,chr3_52255450_52255502_-@UTR3,chr3_52255894_52255946_-@UTR3,chr3_52256422_52256474_-@UTR3,chr3_52256582_52256634_-@UTR3,chr3_52257022_52257074_-@UTR3,chr3_52257280_52257332_-@UTR3	-0.010660500507514645,0.02617613694624421,0.005848990339979543,0.007067264255550404,0.015357722102392196,-0.02658617944120581,-0.01639939943970606	chr3_52257022_52257074_-@UTR3	-0.0265862	0.00361011	0.0307112	NA
PFKP	0.9853999153618282,0.014600084638171815	0.9399561058428921,0.06004389415710795	0.978987	0.939814	0.142138	0.181311	0.0589152	2	chr10_3136726_3136778_+@UTR3,chr10_3137072_3137124_+@UTR3	-0.045162478033467734,0.04215209646123931	chr10_3136726_3136778_+@UTR3	-0.0451625	0.00473608	0.035609	NA
SCML1	0.41111111111111115,0.5888888888888889	0.7497194163860831,0.250280583613917	0.457036	0.767384	0.619976	0.309628	-0.747641	2	chrX_17753510_17753562_+@UTR3,chrX_17754104_17754156_+@UTR3	0.3206396979741631,-0.31177895863804184	chrX_17753510_17753562_+@UTR3	0.32064	0.000125864	0.00616394	NA
TRIM37	0.05636781108479222,0.25220307295778993,0.37614691388276295,0.3152822020746549	0.056136768757089596,0.13067574137092852,0.4809895748933182,0.33219791497866363	0.545605	0.547538	0.0808842	0.077623	-0.00510188	4	chr17_58982626_58982678_-@UTR3,chr17_58998312_58998364_-@UTR3,chr17_58998666_58998718_-@UTR3,chr17_58999094_58999146_-@UTR3	0.0009093454525673922,-0.1196031716146862,0.10475323204286063,0.017646036927212894	chr17_58998312_58998364_-@UTR3	-0.119603	0.00223021	0.0239592	NA
CHST3	0.32708800167604896,0.5168390537610902,0.1300099287679219,0.026063015794939064	0.3705454701288642,0.409137801997384,0.14034005360662863,0.07997667426712325	0.567425	0.535921	0.0390058	0.0923056	0.0824095	4	chr10_72009002_72009054_+@UTR3,chr10_72009804_72009856_+@UTR3,chr10_72013516_72013568_+@UTR3,chr10_72089830_72089882_+@UTR3-EX	0.04276092979708729,-0.10745224337747045,0.009648137400277479,0.05300815394270035	chr10_72009804_72009856_+@UTR3	-0.107452	0.0065585	0.0431753	NA
RLIM	0.14173808525516984,0.10034374880333563,0.0925819685976528,0.10268683912296553,0.11296412068760418,0.11498511931145627,0.07469993810894664,0.1306737119943486,0.12932646811852058	0.1585159706363364,0.08340158143920852,0.09942843584143894,0.08173536312509637,0.12235938769431598,0.10842694085422418,0.09078273609402476,0.13372537464298676,0.12162420967236809	0.29103	0.289757	0.276155	0.277679	0.00632691	9	chrX_74587884_74587936_-@UTR3,chrX_74588900_74588952_-@UTR3,chrX_74589078_74589130_-@UTR3,chrX_74589234_74589286_-@UTR3,chrX_74589630_74589682_-@UTR3,chrX_74590460_74590512_-@UTR3,chrX_74590746_74590798_-@UTR3,chrX_74590960_74591012_-@UTR3,chrX_74591278_74591330_-@UTR3	0.01677059955751309,-0.016915749793909238,0.006844654419555313,-0.020918976268879785,0.009393284461478926,-0.006541334126977938,0.01607481992153384,0.003056857581644562,-0.0076872770365118415	chrX_74589234_74589286_-@UTR3	-0.020919	0.0010903	0.017306	NA
PDE10A	0.18422583470777032,0.12919354594654575,0.1112241483954814,0.11706437072642567,0.08580269641839373,0.11742096777176443,0.13099956455146278,0.12406887148215584	0.1106425603898279,0.08832626204537378,0.12230286596363289,0.12915298453060556,0.08094596997912346,0.14556546465651785,0.11994735258456617,0.20311653985035263	0.272671	0.323554	0.303391	0.249302	-0.246844	8	chr6_165329986_165330038_-@UTR3,chr6_165330170_165330222_-@UTR3,chr6_165330482_165330534_-@UTR3,chr6_165331484_165331536_-@UTR3,chr6_165332000_165332052_-@UTR3,chr6_165332334_165332386_-@UTR3,chr6_165332548_165332600_-@UTR3,chr6_165332838_165332890_-@UTR3	-0.07503069754654292,-0.04254197239439593,0.009058418265117926,0.010133794933783372,-0.006819081348499914,0.02613199571819498,-0.012866246569541037,0.07677864185853328	chr6_165332838_165332890_-@UTR3	0.0767786	0.000752303	0.0149799	NA
RALBP1	0.3622539044328454,0.23832373528052164,0.2909689744443244,0.10845338584230853	0.325271841461632,0.2818599414841045,0.264298278341046,0.1285699387132176	0.509582	0.501294	0.261275	0.272048	0.023658	4	chr18_9536028_9536080_+@UTR3,chr18_9536194_9536246_+@UTR3,chr18_9536746_9536798_+@UTR3,chr18_9537582_9537634_+@UTR3	-0.03707005041907091,0.04323652130038638,-0.02680575439041033,0.019833557395167498	chr18_9536194_9536246_+@UTR3	0.0432365	0.00237544	0.0246664	NA
LONP2	0.3961895479439339,0.24218341552806746,0.13062195512676555,0.14494809305222436,0.08605698834900873	0.330957018569017,0.23926762758083364,0.11720555771977666,0.21794572133489157,0.09462407479548111	0.494356	0.445993	0.250967	0.293149	0.148529	5	chr16_48351826_48351878_+@UTR3,chr16_48352972_48353024_+@UTR3,chr16_48353928_48353980_+@UTR3,chr16_48355004_48355056_+@UTR3,chr16_48355468_48355520_+@UTR3	-0.06576837416092374,-0.004143290879275424,-0.014742063165746291,0.07118038263493986,0.007110144100530166	chr16_48355004_48355056_+@UTR3	0.0711804	0.00404086	0.0327195	NA
RSF1	0.03530042939720415,0.042337808336617634,0.09858521266213871,0.1261379127654306,0.08172233102304882,0.15147805815314924,0.15064196838296848,0.08848261780218987,0.12059053347154632,0.10472312800570614	0.05408801561337003,0.06730269079642033,0.0881339686001627,0.13367076474355646,0.07326556576829206,0.14966127036056154,0.11718357826591197,0.08553523826833533,0.11776907964203494,0.11338982794135466	0.315359	0.301667	0.18631	0.204818	0.0640422	10	chr11_77660802_77660854_-@UTR3,chr11_77661582_77661634_-@UTR3,chr11_77662938_77662990_-@UTR3,chr11_77663130_77663182_-@UTR3,chr11_77664922_77664974_-@UTR3,chr11_77665372_77665424_-@UTR3,chr11_77665938_77665990_-@UTR3,chr11_77666280_77666332_-@UTR3,chr11_77666450_77666502_-@UTR3,chr11_77666698_77666750_-@UTR3	0.018656000998105507,0.024822555873777928,-0.010526857858346048,0.007433673786298778,-0.008532287129286789,-0.0018967100903656553,-0.03348559430919089,-0.0030315971330606706,-0.002907403796574351,0.008560776560997421	chr11_77665938_77665990_-@UTR3	-0.0334856	0.000381952	0.0104467	NA
ARL16	0.15868934599156118,0.8413106540084389	0.2593763548097997,0.7406236451902003	0.854717	0.767778	0.265305	0.352244	0.154757	2	chr17_81681160_81681212_-@UTR3,chr17_81681510_81681562_-@UTR3	0.10013261238865886,-0.10009784981766079	chr17_81681160_81681212_-@UTR3	0.100133	0.000162588	0.0068414	NA
KIF1A	0.14883741399136804,0.2141021281948865,0.1836678350704007,0.21905994917089736,0.23433267357244728	0.1512205905503373,0.22236886324877483,0.21719328025905435,0.20771943898365355,0.20149782695818	0.415299	0.404816	0.291972	0.305962	0.0368821	5	chr2_240713788_240713840_-@UTR3,chr2_240715254_240715306_-@UTR3,chr2_240716092_240716144_-@UTR3,chr2_240716972_240717024_-@UTR3,chr2_240717160_240717212_-@UTR3	0.002266780039780536,0.008154516255926697,0.03338992258298365,-0.011437317894070237,-0.03291589592297414	chr2_240716092_240716144_-@UTR3	0.0333899	0.000578104	0.0128926	NA
AL357075.4	0.09138606899070308,0.08200756030567567,0.05045513350971457,0.10926312272481808,0.08854998310003613,0.5783381313690524	0.030950385729514557,0.10442100668358945,0.10207967372812687,0.1025414253057781,0.13733322583561156,0.5226742827173795	0.490802	0.486195	0.155642	0.159997	0.0136053	6	chr6_154397278_154397330_-@UTR3,chr6_154398168_154398220_-@UTR3,chr6_154398542_154398594_-@UTR3,chr6_154403578_154403630_-@UTR3,chr6_154405120_154405172_-@UTR3,chr6_154406040_154406092_-@UTR3	-0.05594954657454657,0.025739485114485122,0.054776498526498525,-0.002959209209209182,0.05193639881139882,-0.053210465710465726	chr6_154397278_154397330_-@UTR3	-0.0559495	0.00681819	0.0441554	NA
ZBTB44	0.0425389082526488,0.06919792732992629,0.05699920535877359,0.0962593391083934,0.06923894140439903,0.08124874984906011,0.08014124050828218,0.11702501285728449,0.07400410575293573,0.1629321049784982,0.10314089271871271,0.047273571881085386	0.06016593460175599,0.056681260315059066,0.05983153695177392,0.12034596931999464,0.06537369823165613,0.07210010229904489,0.0782508703635068,0.10998448786790464,0.07633428433692596,0.15416382952617386,0.09226636944756701,0.05450165673863716	0.271865	0.265272	0.21537	0.222212	0.035419	12	chr11_130227708_130227760_-@UTR3,chr11_130228162_130228214_-@UTR3,chr11_130229150_130229202_-@UTR3,chr11_130229390_130229442_-@UTR3,chr11_130229778_130229830_-@UTR3,chr11_130230930_130230982_-@UTR3,chr11_130231288_130231340_-@UTR3,chr11_130231610_130231662_-@UTR3,chr11_130232354_130232406_-@UTR3,chr11_130233204_130233256_-@UTR3,chr11_130233442_130233494_-@UTR3,chr11_130233956_130234008_-@UTR3	0.017584931516746345,-0.012524684532854526,0.0028098706986318875,0.024040989499137383,-0.00388066631544072,-0.009159217616717633,-0.0019102573805803574,-0.007053089423882095,0.0023055643916914392,-0.008778098468427614,-0.0108855683262805,0.007197480511292542	chr11_130229390_130229442_-@UTR3	0.024041	0.00682313	0.0441554	NA
TRPT1	0.05397389786906332,0.16096040985643553,0.09924981634564706,0.13368398342877896,0.180920702283322,0.37121119021675314	0.12167493381993882,0.06733018067799224,0.09753741636467998,0.15826029967359737,0.2193044454153709,0.33589272404842063	0.449782	0.429262	0.269725	0.282169	0.0673666	6	chr11_64166764_64166816_-@UTR3-EX,chr11_64170654_64170706_-@UTR3-EX,chr11_64181282_64181334_-@UTR3-EX,chr11_64182964_64183016_-@UTR3-EX,chr11_64184866_64184918_-@UTR3-EX,chr11_64223814_64223866_-@UTR3	0.061900070677633756,-0.09633012170312318,-0.006205421531253155,0.019896500842738585,0.033774609458287586,-0.037906006142537196	chr11_64170654_64170706_-@UTR3-EX	-0.0963301	0.00799884	0.0479623	NA
ARHGEF11	0.11140926257205326,0.8885907374279468	0.1977091845420497,0.8022908154579502	0.894645	0.815502	0.181915	0.261058	0.133627	2	chr1_156934898_156934950_-@UTR3,chr1_156935496_156935548_-@UTR3	0.08716873924206965,-0.08465468564770184	chr1_156934898_156934950_-@UTR3	0.0871687	0.0040122	0.0325648	NA
AHR	0.5759042814318095,0.3025957859254635,0.12149993264272713	0.5872046444413247,0.21423907326371155,0.19855628229496386	0.641533	0.597113	0.206289	0.261809	0.103518	3	chr7_17343050_17343102_+@UTR3,chr7_17343338_17343390_+@UTR3,chr7_17344468_17344520_+@UTR3	0.010270885871850544,-0.08965339431038913,0.074705941947277	chr7_17343338_17343390_+@UTR3	-0.0896534	0.001086	0.017306	NA
TMEM45B	0.42539682539682544,0.5746031746031746	0.08143939393939394,0.9185606060606061	0.438265	0.102163	0.584063	0.920166	2.10093	2	chr11_129858878_129858930_+@UTR3,chr11_129861128_129861180_+@UTR3-EX	-0.2804812834224599,0.32521538918597737	chr11_129861128_129861180_+@UTR3-EX	0.325215	5.59e-05	0.00413741	NA
ZDHHC3	0.10256852858637609,0.0625247801457121,0.06617217583701289,0.32560104142692375,0.4431334740039752	0.05910764818374383,0.0686392152672883,0.11505834296376961,0.3266049338546675,0.4305898597305307	0.503963	0.522895	0.148582	0.124159	-0.0532043	5	chr3_44917818_44917870_-@UTR3,chr3_44920076_44920128_-@UTR3,chr3_44925150_44925202_-@UTR3,chr3_44925958_44926010_-@UTR3,chr3_44926566_44926618_-@UTR3	-0.04357333797346462,0.005726860240680767,0.048201271462258555,0.0007162039725891467,-0.012750229512352274	chr3_44925150_44925202_-@UTR3	0.0482013	0.00239632	0.0247194	NA
EID2	0.5212945598176848,0.47870544018231526	0.4714010597797676,0.5285989402202323	0.552801	0.594477	0.588375	0.5467	-0.10486	2	chr19_39538870_39538922_-@UTR3,chr19_39539154_39539206_-@UTR3	-0.04964962258924782,0.04998363151941948	chr19_39539154_39539206_-@UTR3	0.0499836	0.000218811	0.00792915	NA
SLC23A2	0.03598737416516171,0.1838915238170922,0.09962996987930345,0.17472977303741344,0.2088060072136535,0.1654413009601086,0.13151405092726717	0.06338058698573722,0.20495187930810252,0.07381576855825783,0.1321422378289331,0.1571436828947559,0.17388657678357253,0.19467926764064106	0.384504	0.382655	0.239928	0.242635	0.00695269	7	chr20_4852434_4852486_-@UTR3,chr20_4854790_4854842_-@UTR3,chr20_4855072_4855124_-@UTR3,chr20_4855474_4855526_-@UTR3,chr20_4855862_4855914_-@UTR3,chr20_4856042_4856094_-@UTR3,chr20_4856856_4856908_-@UTR3	0.027378328503114502,0.02109018186735717,-0.025560881598558988,-0.04229087786808902,-0.05131648221433238,0.008504308610121303,0.06296986237704738	chr20_4856856_4856908_-@UTR3	0.0629699	0.00500469	0.0368335	NA
ESYT2	0.06460207301873297,0.1546960018485176,0.19687719115542257,0.06417278592605806,0.24670301334974742,0.2729489347015214	0.06301573866978812,0.20441623949900486,0.20207296226579818,0.07639772255820626,0.15200061404545923,0.3020967229617433	0.423945	0.411541	0.220392	0.238054	0.0428423	6	chr7_158730982_158731034_-@UTR3,chr7_158732436_158732488_-@UTR3,chr7_158732742_158732794_-@UTR3,chr7_158733426_158733478_-@UTR3,chr7_158733810_158733862_-@UTR3,chr7_158734032_158734084_-@UTR3	-0.002231415887891941,0.049050720244383506,0.0046372096978600785,0.011555368218984174,-0.09506459033750686,0.028593298381559384	chr7_158733810_158733862_-@UTR3	-0.0950646	1.81e-05	0.00244743	NA
TMEM106B	0.268763284564275,0.2778839906468184,0.19821062482318405,0.08930854328892061,0.1658335566768019	0.29729134828899656,0.2812020247178783,0.1916616324161434,0.08014212226036412,0.14970287231661764	0.431726	0.446251	0.308302	0.290485	-0.0477396	5	chr7_12230394_12230446_+@UTR3,chr7_12231952_12232004_+@UTR3,chr7_12232248_12232300_+@UTR3,chr7_12232702_12232754_+@UTR3,chr7_12235442_12235494_+@UTR3	0.028521618370603574,0.0033401433006439163,-0.0065182715922675605,-0.00912883062804512,-0.016087873476580472	chr7_12230394_12230446_+@UTR3	0.0285216	0.00638978	0.0427637	NA
MPRIP	0.28633074835953587,0.10611726351979782,0.05180811861373564,0.11159282707188108,0.11592892551469629,0.06868458722736438,0.09616600973267224,0.10203417018920129,0.06133734977111543	0.25786551048034456,0.15086431711278286,0.0607866613711568,0.12424525487340658,0.10614659994699796,0.07953898079743901,0.08647827585146564,0.07375746236162371,0.060316937204782956	0.33346	0.345056	0.210845	0.197877	-0.0493179	9	chr17_17185490_17185542_+@UTR3,chr17_17185902_17185954_+@UTR3,chr17_17186170_17186222_+@UTR3,chr17_17187160_17187212_+@UTR3,chr17_17188590_17188642_+@UTR3,chr17_17189572_17189624_+@UTR3,chr17_17189944_17189996_+@UTR3,chr17_17190906_17190958_+@UTR3,chr17_17191828_17191880_+@UTR3	-0.028741504558552178,0.04420413697790174,0.008488232593324381,0.012177334598223358,-0.010193936279710214,0.010369725714358985,-0.01011583169701899,-0.028657008720189114,-0.0014878880280009693	chr17_17185902_17185954_+@UTR3	0.0442041	0.00460861	0.0350506	NA
REEP3	0.38919140707552274,0.08647546078834774,0.2263320314125298,0.2138761992670989,0.08412490145650071	0.355570760971387,0.07640550344280342,0.2329549611736527,0.23182345622481063,0.10324531818734642	0.469101	0.450697	0.25358	0.276777	0.057741	5	chr10_63620946_63620998_+@UTR3,chr10_63621538_63621590_+@UTR3,chr10_63622102_63622154_+@UTR3,chr10_63622394_63622446_+@UTR3,chr10_63623924_63623976_+@UTR3	-0.03364780324726613,-0.010172040928660753,0.006510438567087828,0.01782100877720924,0.01897687763027671	chr10_63620946_63620998_+@UTR3	-0.0336478	0.00797675	0.0479623	NA
ZNF283	0.30218673738014257,0.10703099479256743,0.13484656328663938,0.2749409119732519,0.18099479256739878	0.16751053541660196,0.12817486203004794,0.2830946686132596,0.20832686194721417,0.2128930719928763	0.320193	0.248533	0.344095	0.406508	0.365504	5	chr19_43837242_43837294_+@UTR3,chr19_43837548_43837600_+@UTR3,chr19_43847182_43847234_+@UTR3,chr19_43847638_43847690_+@UTR3,chr19_43848622_43848674_+@UTR3	-0.1306299481299481,0.02279844779844782,0.14754358254358255,-0.06411479661479655,0.03292217542217543	chr19_43847182_43847234_+@UTR3	0.147544	0.002521	0.0253835	NA
DGKE	0.3337817236122321,0.0742803336023675,0.0837413684871312,0.07146444265088332,0.14314411263563806,0.09715720563178191,0.06933010492332527,0.06293605954622904,0.06416464891041163	0.33950600410350074,0.05961278302685712,0.11890317110140619,0.08314466662807574,0.07681656022005397,0.10505653569338227,0.07577808936370008,0.09919366422900705,0.0419885256340166	0.361199	0.364214	0.214487	0.211726	-0.0119909	9	chr17_56863266_56863318_+@UTR3,chr17_56863938_56863990_+@UTR3,chr17_56865308_56865360_+@UTR3,chr17_56865514_56865566_+@UTR3,chr17_56866544_56866596_+@UTR3,chr17_56866790_56866842_+@UTR3,chr17_56866996_56867048_+@UTR3,chr17_56867900_56867952_+@UTR3,chr17_56868596_56868648_+@UTR3	0.004297782205191225,-0.016728388372386382,0.03283144334913923,0.009399548024687288,-0.06788937599820734,0.005706935256462417,0.0042868367775773936,0.03388887648031465,-0.024237746971720965	chr17_56866544_56866596_+@UTR3	-0.0678894	0.00755251	0.0463095	NA
LATS1	0.12211741845165665,0.029063764770106443,0.2022141253998236,0.33620119686173583,0.3104034945166774	0.12883782330993487,0.05366101730643563,0.19168432091738863,0.3718314572398238,0.25398538122641706	0.388285	0.341196	0.337238	0.364556	0.186515	5	chr6_149658506_149658558_-@UTR3,chr6_149661346_149661398_-@UTR3,chr6_149661676_149661728_-@UTR3,chr6_149662062_149662114_-@UTR3,chr6_149679930_149679982_-@UTR3	0.006973720596728683,0.02481453514951793,-0.010233765818268958,0.035700063070516874,-0.056003557755464894	chr6_149679930_149679982_-@UTR3	-0.0560036	0.00366756	0.0309679	NA
ARL17A	0.7063492063492064,0.29365079365079366	0.44166666666666665,0.5583333333333333	0.2942	0.558676	0.706577	0.4421	-0.925218	2	chr17_46490240_46490292_-@UTR3-EX,chr17_46557108_46557160_-@UTR3	-0.23655734243969545,0.2522993346522758	chr17_46557108_46557160_-@UTR3	0.252299	0.00474135	0.0356117	NA
AGO4	0.14289168161310825,0.0718333446882911,0.1208302107199477,0.21133426367436736,0.1124877934204016,0.12823814051211627,0.10991091971840723,0.10247364565336044	0.1675702601857837,0.056937896865683846,0.10107690198187937,0.21517726890885405,0.11668113781270673,0.18700780535500652,0.08213171837016026,0.07341701051992565	0.315672	0.32783	0.257995	0.243254	-0.0545212	8	chr1_35854080_35854132_+@UTR3,chr1_35854482_35854534_+@UTR3,chr1_35854646_35854698_+@UTR3,chr1_35854896_35854948_+@UTR3,chr1_35855402_35855454_+@UTR3,chr1_35856152_35856204_+@UTR3,chr1_35857470_35857522_+@UTR3,chr1_35857634_35857686_+@UTR3	0.024445048865789243,-0.015023616653094797,-0.019795806262854765,0.00371482703593895,0.004002930825582174,0.05836421213320214,-0.027840386551074514,-0.029076441251581014	chr1_35856152_35856204_+@UTR3	0.0583642	0.00727157	0.0456315	NA
ANKRD49	0.295925694299678,0.4974173673360665,0.20665693836425544	0.405759682224429,0.3150413770274743,0.27919894074809665	0.499185	0.512878	0.414751	0.400897	-0.0390413	3	chr11_94497788_94497840_+@UTR3,chr11_94498642_94498694_+@UTR3,chr11_94499548_94499600_+@UTR3	0.10248350052271626,-0.18197327363994026,0.06565215829921714	chr11_94498642_94498694_+@UTR3	-0.181973	0.00144778	0.0195774	NA
DTD1	0.829499064281673,0.17050093571832703	0.7015960230245945,0.29840397697540555	0.844797	0.735017	0.279175	0.388955	0.200827	2	chr20_18763472_18763524_+@UTR3,chr20_18763808_18763860_+@UTR3	-0.12694734718272593,0.12256940875503933	chr20_18763472_18763524_+@UTR3	-0.126947	0.00134511	0.0188941	NA
ZNF678	0.1322544595251704,0.21627476684591027,0.220599456487224,0.16934821121357665,0.16933351911726094,0.09218958681085776	0.10738013418425789,0.32901325478645066,0.19941635302460048,0.13700430916925763,0.17745595374461354,0.04972999509081982	0.336033	0.364874	0.307873	0.282692	-0.118797	6	chr1_227655858_227655910_+@UTR3,chr1_227657196_227657248_+@UTR3,chr1_227657346_227657398_+@UTR3,chr1_227660906_227660958_+@UTR3,chr1_227661134_227661186_+@UTR3,chr1_227661490_227661542_+@UTR3	-0.02419587197857291,0.11157219071695648,-0.020851449463668625,-0.0317680806410256,0.008354704113513273,-0.04158152120232354	chr1_227657196_227657248_+@UTR3	0.111572	0.00762821	0.0465424	NA
SNRNP27	0.35912349299446067,0.25593027044639943,0.2790322580645161,0.10591397849462364	0.32862554112554115,0.18904761904761905,0.32049242424242425,0.1618344155844156	0.509511	0.466397	0.334868	0.376636	0.127554	4	chr2_69904370_69904422_+@UTR3,chr2_69904644_69904696_+@UTR3,chr2_69904844_69904895_+@UTR3,chr2_69905082_69905134_+@UTR3	-0.03026463448458333,-0.06646711841724628,0.04123545891448699,0.05563144230024025	chr2_69904644_69904696_+@UTR3	-0.0664671	0.00353549	0.0303354	NA
USP28	0.2484653730482429,0.7515346269517571	0.3242314250457063,0.6757685749542937	0.762763	0.690784	0.285544	0.357447	0.143	2	chr11_113798040_113798091_-@UTR3,chr11_113799032_113799084_-@UTR3	0.07444721431832702,-0.07531029439605319	chr11_113799032_113799084_-@UTR3	-0.0753103	0.00388071	0.0319993	NA
CPSF6	0.41991509932074994,0.11161635058732483,0.11566740697512712,0.14157440540077357,0.07349493770914045,0.06337545574542601,0.07435634426145805	0.32427827513422364,0.0854335565284297,0.14320374035005806,0.18615410065512053,0.08622973692109831,0.0887470674604941,0.08595352295057566	0.430368	0.387331	0.190931	0.232296	0.152004	7	chr12_69269644_69269696_+@UTR3,chr12_69270244_69270296_+@UTR3,chr12_69270408_69270460_+@UTR3,chr12_69271730_69271782_+@UTR3,chr12_69272662_69272714_+@UTR3,chr12_69272812_69272864_+@UTR3,chr12_69273340_69273392_+@UTR3	-0.09561801993450592,-0.026429165553005174,0.027179595322668032,0.04417300155435669,0.012393041385211925,0.02499135229549558,0.011255399541116123	chr12_69269644_69269696_+@UTR3	-0.095618	0.000784043	0.0152536	NA
NENF	0.8786054567812527,0.12139454321874737	0.9353634555271384,0.0646365444728616	0.886463	0.932767	0.268723	0.222419	-0.0734559	2	chr1_212446100_212446152_+@UTR3,chr1_212446350_212446402_+@UTR3	0.05623448625369998,-0.05649788269400795	chr1_212446350_212446402_+@UTR3	-0.0564979	0.000690155	0.0144574	NA
KLHL15	0.06015354991606597,0.2015588598868445,0.1873416065047965,0.039862542012734564,0.17275321015693287,0.10726307149205096,0.04100205172092207,0.1900651083096526	0.058072074983839685,0.18494897959183673,0.13246106134761595,0.07812201803798442,0.1647285837411888,0.10287961338381507,0.06490904053929264,0.21387862837442673	0.285387	0.305491	0.292307	0.273829	-0.0982071	8	chrX_23984326_23984378_-@UTR3,chrX_23984752_23984804_-@UTR3,chrX_23984924_23984976_-@UTR3,chrX_23985096_23985148_-@UTR3,chrX_23986300_23986352_-@UTR3,chrX_23986996_23987048_-@UTR3,chrX_23987446_23987498_-@UTR3,chrX_23987814_23987866_-@UTR3	-0.0014650529397468512,-0.0160363362246298,-0.054125828159195005,0.038732892280929125,-0.007494228989498031,-0.0037836120528927653,0.024434481638075135,0.024245813714892567	chrX_23984924_23984976_-@UTR3	-0.0541258	0.000889832	0.0163279	NA
MOB4	0.27401480003828466,0.15687049882543377,0.3285658034150576,0.24054889772122398	0.30746621482825626,0.20345928105300964,0.2415094201474861,0.24756508397124796	0.342774	0.390919	0.421253	0.374366	-0.189612	4	chr2_197550878_197550930_+@UTR3,chr2_197551098_197551150_+@UTR3,chr2_197552356_197552408_+@UTR3,chr2_197552498_197552550_+@UTR3	0.032895922823404866,0.04586256399319702,-0.08695733280843779,0.0065145392199582874	chr2_197552356_197552408_+@UTR3	-0.0869573	0.00167808	0.0210065	NA
SLC22A5	0.42090286692340606,0.5790971330765939	0.6331533963112911,0.366846603688709	0.482032	0.669655	0.621871	0.434248	-0.474288	2	chr5_132394944_132394996_+@UTR3,chr5_132395362_132395414_+@UTR3	0.1995841995841996,-0.21015869349202682	chr5_132395362_132395414_+@UTR3	-0.210159	0.000240459	0.00837906	NA
VWA1	0.8629352263213004,0.06413694549615877,0.07292782818254086	0.7323951130775667,0.12772806413304438,0.13987682278938895	0.725484	0.660526	0.090845	0.170211	0.135329	3	chr1_1440740_1440791_+@UTR3,chr1_1442852_1442904_+@UTR3,chr1_1449574_1449625_+@UTR3-EX	-0.1304290734451128,0.06322323331742595,0.0665780897336265	chr1_1440740_1440791_+@UTR3	-0.130429	1.7e-05	0.00240292	NA
CXXC5	0.267933094100049,0.33041094345788213,0.2110071298315585,0.19064883261051047	0.3125982191135144,0.3331968883670419,0.17812936656272596,0.17607552595671774	0.461579	0.487651	0.381388	0.355704	-0.0792714	4	chr5_139683124_139683176_+@UTR3,chr5_139683356_139683408_+@UTR3,chr5_139683562_139683614_+@UTR3,chr5_139683778_139683830_+@UTR3	0.0448031782613218,0.0030135598393365437,-0.03254060796197511,-0.01426994270689888	chr5_139683124_139683176_+@UTR3	0.0448032	0.00799491	0.0479623	NA
UCHL5	0.20700576714226862,0.06014305508744336,0.28908924090926114,0.3748651836872261,0.06889675317380069	0.21323847640523194,0.06412408265715036,0.21617533396764013,0.4502870839608683,0.05617502300910926	0.2606	0.262196	0.424547	0.423522	-0.00881163	5	chr1_193014756_193014808_-@UTR3,chr1_193014920_193014972_-@UTR3,chr1_193015542_193015594_-@UTR3,chr1_193016242_193016294_-@UTR3,chr1_193018578_193018630_-@UTR3	0.006320145900910845,0.004108485374488588,-0.07238216574063741,0.07508138236949802,-0.012519744391074138	chr1_193016242_193016294_-@UTR3	0.0750814	0.00186169	0.022155	NA
FBXO42	0.12160386783376896,0.11811903784339617,0.12918821693414723,0.14485162554672193,0.13946959861271255,0.3467676532292532	0.11320048809688261,0.12890630995686944,0.11513317779721981,0.19844412723263394,0.16321506960752716,0.2811008273088671	0.414364	0.410671	0.236136	0.241123	0.0129166	6	chr1_16247356_16247408_-@UTR3,chr1_16248508_16248560_-@UTR3,chr1_16249446_16249498_-@UTR3,chr1_16250038_16250090_-@UTR3,chr1_16250214_16250266_-@UTR3,chr1_16250644_16250696_-@UTR3	-0.007942125860646451,0.011168597165549105,-0.013514761128298872,0.053659620512985146,0.023958750949429702,-0.06497444195819335	chr1_16250644_16250696_-@UTR3	-0.0649744	0.00466077	0.0352991	NA
DZIP1	0.06860682561944835,0.11048776686925356,0.2595059996883279,0.5613994078229703	0.1331430007900596,0.06136249371543489,0.1395891690009337,0.6659053364935718	0.61675	0.62031	0.186241	0.182722	-0.00830365	4	chr13_95579838_95579890_-@UTR3,chr13_95580388_95580440_-@UTR3,chr13_95581440_95581492_-@UTR3,chr13_95582032_95582084_-@UTR3	0.062161909619132635,-0.05029501090944416,-0.1200805486606838,0.1026426088538801	chr13_95581440_95581492_-@UTR3	-0.120081	0.000194739	0.0075078	NA
USP9X	0.5066660046999636,0.1626612952797046,0.20532032095928432,0.12535237906104754	0.5246516112977478,0.11128375015553067,0.20861639915391314,0.15544823939280827	0.561646	0.553726	0.279036	0.286635	0.020488	4	chrX_41232606_41232658_+@UTR3,chrX_41233066_41233118_+@UTR3,chrX_41233290_41233342_+@UTR3,chrX_41233680_41233732_+@UTR3	0.017909781641718858,-0.05124970327283994,0.003268058630355314,0.02997118426192036	chrX_41233066_41233118_+@UTR3	-0.0512497	0.0027363	0.0264568	NA
NAA30	0.22032384806348385,0.18015032932971717,0.16431650092556715,0.10632043279234289,0.09352516251237676,0.1457548753713031,0.089608851005209	0.21315462730827028,0.1480374799216974,0.13283022038249861,0.1487491340561999,0.08291842674409261,0.17937225784463293,0.09493785374260831	0.366567	0.34628	0.251574	0.274622	0.0821362	7	chr14_57409682_57409734_+@UTR3,chr14_57409888_57409940_+@UTR3,chr14_57410578_57410630_+@UTR3,chr14_57410874_57410926_+@UTR3,chr14_57411024_57411076_+@UTR3,chr14_57412222_57412274_+@UTR3,chr14_57412538_57412590_+@UTR3	-0.007087263717291542,-0.03193060688668595,-0.031308225132541695,0.04231487435467632,-0.01051317259420588,0.03354055397692107,0.005368370412911258	chr14_57410874_57410926_+@UTR3	0.0423149	0.00159106	0.0206244	NA
CTDSPL2	0.17252784437975507,0.10608087307150714,0.056017608423529874,0.08066783204094186,0.05503374261263794,0.10443114592898761,0.06393283060126274,0.06691661175917418,0.07084477915317494,0.06294896479037082,0.08451933642827246,0.07607843081038529	0.16610439345469924,0.11337299688885522,0.06441325706010673,0.08766881964151199,0.0720670435267695,0.09195147525399266,0.0498064105896088,0.07117522124870533,0.06138927980297155,0.053817529994460725,0.10726477194025669,0.06096880059806148	0.27395	0.277952	0.216995	0.212894	-0.0209231	12	chr15_44524230_44524282_+@UTR3,chr15_44524442_44524494_+@UTR3,chr15_44524938_44524990_+@UTR3,chr15_44525590_44525642_+@UTR3,chr15_44526154_44526206_+@UTR3,chr15_44526390_44526442_+@UTR3,chr15_44526668_44526720_+@UTR3,chr15_44526904_44526956_+@UTR3,chr15_44527524_44527576_+@UTR3,chr15_44527944_44527996_+@UTR3,chr15_44528464_44528516_+@UTR3,chr15_44528870_44528922_+@UTR3	-0.00649868155189251,0.007189446933146909,0.008292810815846444,0.006900814735248076,0.016915230677129814,-0.012548165710304371,-0.01420008991085464,0.004157861263678619,-0.009529756937242492,-0.009210891684821289,0.022616767294127163,-0.015181897057587983	chr15_44528464_44528516_+@UTR3	0.0226168	0.00622801	0.0421564	NA
ALDH9A1	0.13433915272915967,0.8656608472708403	0.25505033742670646,0.7449496625732935	0.872962	0.761034	0.194851	0.306779	0.197958	2	chr1_165662202_165662254_-@UTR3,chr1_165662888_165662940_-@UTR3	0.12103305314595203,-0.11946586316704044	chr1_165662202_165662254_-@UTR3	0.121033	2.22e-05	0.00267647	NA
SLC7A6	0.11843736547379281,0.12806393130592805,0.16946831520527686,0.12107274710160572,0.11126960478837027,0.1166480072567697,0.11557785561229651,0.07478899867760146,0.04467317457835865	0.09580210302200787,0.11495314645937078,0.1343601096371089,0.14043123812073824,0.15508750946083932,0.09797734741846065,0.10194238591064507,0.0833930635973913,0.07605309637343789	0.320628	0.299128	0.232836	0.254859	0.100137	9	chr16_68297408_68297460_+@UTR3,chr16_68297744_68297796_+@UTR3,chr16_68298228_68298280_+@UTR3,chr16_68298978_68299030_+@UTR3,chr16_68299634_68299686_+@UTR3,chr16_68300164_68300216_+@UTR3,chr16_68300386_68300438_+@UTR3,chr16_68301524_68301576_+@UTR3,chr16_68301736_68301788_+@UTR3	-0.022186747615653812,-0.01269451198860562,-0.034632800852177875,0.019703132588050967,0.04408673425108049,-0.018223597123415064,-0.013204266577962628,0.00899200797112415,0.03172534024996053	chr16_68299634_68299686_+@UTR3	0.0440867	6.35e-05	0.00426255	NA
PDCD2	0.04212336768753455,0.16451238864049444,0.438013982235546,0.047335923960040674,0.07637340877596178,0.1534172249923333,0.07822370370808941	0.06516632776007246,0.1762880411270972,0.4079146897115338,0.06626360866154928,0.06248605542923496,0.12502193194577696,0.09685934536473528	0.200754	0.198149	0.386262	0.388816	0.0188452	7	chr6_170577092_170577143_-@UTR3,chr6_170577156_170577208_-@UTR3,chr6_170577504_170577556_-@UTR3,chr6_170581270_170581322_-@UTR3,chr6_170581724_170581776_-@UTR3,chr6_170581886_170581938_-@UTR3,chr6_170582852_170582904_-@UTR3	0.0234298080518383,0.012140146686234587,-0.029767841103171766,0.019319356184959204,-0.013402952157498246,-0.02790928703337256,0.019018060412890753	chr6_170577504_170577556_-@UTR3	-0.0297678	0.00189454	0.022155	NA
PDS5A	0.07080299509700046,0.14835450171290004,0.18461241286507613,0.16356930487523083,0.0835527184296365,0.349108067020156	0.06343635995145776,0.12761906704292117,0.1591007805005028,0.1748300790392603,0.1172096158702393,0.35780409759561865	0.407668	0.428091	0.258633	0.237169	-0.0705229	6	chr4_39823000_39823052_-@UTR3,chr4_39823374_39823426_-@UTR3,chr4_39823840_39823892_-@UTR3,chr4_39824448_39824500_-@UTR3,chr4_39824934_39824986_-@UTR3,chr4_39825172_39825224_-@UTR3	-0.007346386240033517,-0.02069686032897569,-0.025458850202298766,0.011239556464250122,0.0335957180522545,0.008681111627945604	chr4_39824934_39824986_-@UTR3	0.0335957	0.00830883	0.0492636	NA
AC006538.2	0.5751633986928105,0.17980960500142085,0.24502699630576866	0.7659404502541758,0.06214960058097313,0.1719099491648511	0.306421	0.174023	0.588087	0.770299	0.816234	3	chr19_2732526_2732578_-@UTR3,chr19_2736648_2736700_-@UTR3,chr19_2736870_2736922_-@UTR3	0.18981979407511318,-0.1027693346842283,-0.060372015691164654	chr19_2732526_2732578_-@UTR3	0.18982	0.00619029	0.0419712	NA
AGO1	0.1324133970612226,0.15323601204516357,0.1287831371241441,0.13600431510127511,0.14974059166563908,0.09261952191919004,0.08042230272081514,0.05261115226290217,0.07416957009964815	0.10920599592915975,0.13811007120799962,0.13770805988320112,0.11669329833171639,0.15646721451806195,0.09534358018350483,0.08712438255752755,0.06313052052223425,0.09621687686659436	0.32656	0.308197	0.218727	0.23813	0.083495	9	chr1_35920302_35920354_+@UTR3,chr1_35920634_35920686_+@UTR3,chr1_35920934_35920986_+@UTR3,chr1_35922224_35922276_+@UTR3,chr1_35922976_35923028_+@UTR3,chr1_35923864_35923916_+@UTR3,chr1_35924258_35924310_+@UTR3,chr1_35925414_35925466_+@UTR3,chr1_35925792_35925844_+@UTR3	-0.023149312406535116,-0.015077626027748842,0.008944923811892186,-0.019254262849102907,0.006753167780826713,0.002754246035142016,0.006727672444979682,0.01054114314624513,0.022055803545563815	chr1_35920302_35920354_+@UTR3	-0.0231493	0.00143052	0.0194588	NA
ELL	0.36993119601815255,0.23654767133028,0.39352113265156746	0.4118291010545231,0.36327847921691026,0.2248924197285667	0.460744	0.415923	0.415806	0.473919	0.147649	3	chr19_18442868_18442920_-@UTR3,chr19_18444368_18444420_-@UTR3,chr19_18444630_18444682_-@UTR3	0.04191237383156782,0.12649009686098175,-0.1634315770896829	chr19_18444630_18444682_-@UTR3	-0.163432	0.00344627	0.0299254	NA
GPATCH2	0.08703406127341219,0.2708261988180853,0.10149802867855608,0.36488852594329274,0.17575318528665385	0.10515668255606336,0.12596032565072812,0.12256130522384394,0.38498206300063886,0.26133962356872575	0.456336	0.447733	0.0921576	0.109278	0.0274595	5	chr1_217430854_217430906_-@UTR3,chr1_217608268_217608320_-@UTR3,chr1_217608694_217608746_-@UTR3,chr1_217608838_217608890_-@UTR3,chr1_217609790_217609842_-@UTR3	0.017045590368455432,-0.1435954231883179,0.02017091444613038,0.019377635465566645,0.08355572751812748	chr1_217608268_217608320_-@UTR3	-0.143595	0.000790596	0.0152843	NA
ZBTB8OS	0.14465329801893048,0.4656654116140319,0.38968129036703764	0.14556893297065673,0.3898810684095528,0.46454999861979046	0.41003	0.48158	0.428474	0.376863	-0.232043	3	chr1_32621438_32621490_-@UTR3,chr1_32621836_32621888_-@UTR3,chr1_32631856_32631908_-@UTR3	0.0008957002378979229,-0.07548844192321608,0.07454745632219928	chr1_32621836_32621888_-@UTR3	-0.0754884	0.00143908	0.0195327	NA
TMA7	0.7429873888381934,0.25701261116180657	0.79902701784019,0.20097298215981	0.78405	0.823845	0.438946	0.399151	-0.0714277	2	chr3_48443870_48443922_+@UTR3,chr3_48444014_48444066_+@UTR3	0.055985572699977504,-0.05584702664063132	chr3_48443870_48443922_+@UTR3	0.0559856	0.000563572	0.012796	NA
MTHFR	0.10387501854511151,0.2432085235665212,0.45198285731881077,0.20093360056955656	0.13167701863354034,0.367287784679089,0.2745341614906832,0.22650103519668732	0.514346	0.480343	0.220637	0.269126	0.0986763	4	chr1_11785696_11785748_-@UTR3,chr1_11788888_11788940_-@UTR3,chr1_11790000_11790052_-@UTR3,chr1_11790440_11790492_-@UTR3	0.027544499640887274,0.12292358115441357,-0.17577091586433957,0.025214420406823895	chr1_11790000_11790052_-@UTR3	-0.175771	0.00349426	0.0300909	NA
CREB3L2	0.29950557992765336,0.23950619564380818,0.13389517432463635,0.32709305010390205	0.17676655567887534,0.3353681095079541,0.1948205697373289,0.29304476507584165	0.359757	0.383543	0.397108	0.37314	-0.0923658	4	chr7_137875104_137875156_-@UTR3,chr7_137875684_137875736_-@UTR3,chr7_137878998_137879050_-@UTR3,chr7_137879518_137879570_-@UTR3	-0.1197756174935049,0.09667894777176428,0.06241171511446797,-0.032055145861264345	chr7_137875104_137875156_-@UTR3	-0.119776	0.000202036	0.00769834	NA
ANK1	0.0851499690785405,0.18011750154607298,0.2053700267985982,0.5293625025767884	0.08023181143062008,0.38611731612476213,0.20632162851075733,0.3273292439338604	0.55972	0.520168	0.180745	0.235709	0.105729	4	chr8_41653204_41653256_-@UTR3,chr8_41654674_41654726_-@UTR3,chr8_41655020_41655072_-@UTR3,chr8_41655350_41655402_-@UTR3	-0.012928476946334075,0.1964257369614512,-0.0059930083144368596,-0.20367630385487523	chr8_41655350_41655402_-@UTR3	-0.203676	0.00110595	0.0173855	NA
C6orf89	0.2134779457775461,0.1312766085547178,0.1820184620341966,0.12086743010432698,0.10490460746873592,0.15241056725482857,0.09504437880564803	0.1997182238540766,0.12252743323586977,0.16448823997445558,0.1247739474472273,0.10996725060958479,0.14779066380754732,0.13073424107123857	0.360845	0.342122	0.279882	0.298441	0.0768674	7	chr6_36923492_36923544_+@UTR3,chr6_36923912_36923964_+@UTR3,chr6_36924476_36924528_+@UTR3,chr6_36925084_36925136_+@UTR3,chr6_36925328_36925380_+@UTR3,chr6_36925566_36925618_+@UTR3,chr6_36926230_36926282_+@UTR3	-0.01368074152850915,-0.008670950707091563,-0.017445356119842048,0.003970023526368355,0.005125413127773509,-0.004547062457251172,0.035716804660534826	chr6_36926230_36926282_+@UTR3	0.0357168	0.00144632	0.0195774	NA
CYREN	0.3818578192909941,0.6181421807090058	0.49170205219813296,0.5082979478018671	0.635071	0.530402	0.409918	0.514588	0.259833	2	chr7_135165794_135165846_-@UTR3,chr7_135166870_135166922_-@UTR3	0.10880818234429512,-0.10926007967822715	chr7_135166870_135166922_-@UTR3	-0.10926	6.09e-05	0.00425729	NA
SPNS2	0.0764021164021164,0.9235978835978836	0.24799070325386116,0.7520092967461389	0.123419	0.286031	0.926293	0.763681	-1.21261	2	chr17_4538034_4538086_+@UTR3,chr17_4539000_4539052_+@UTR3	0.17120931291417735,-0.1693933838872188	chr17_4538034_4538086_+@UTR3	0.171209	0.000822568	0.015526	NA
MIR4638	0.5092756930358351,0.49072430696416497	0.23023023023023023,0.7697697697697697	0.534963	0.787503	0.551752	0.299212	-0.557846	2	chr5_181221750_181221802_-@UTR3-EX,chr5_181222268_181222320_-@UTR3-EX	-0.2638915470494418,0.2728047391205285	chr5_181222268_181222320_-@UTR3-EX	0.272805	0.000390794	0.0105689	NA
PAFAH1B2	0.22639592985280646,0.10293789937067663,0.1462776827280228,0.11945546834859776,0.10699965762970873,0.0813936083057405,0.10647374277949835,0.11006601098494888	0.20413397157729163,0.0928183112316578,0.1485537974107495,0.11548401627538632,0.11762465432546314,0.09485092676046517,0.11495481115293663,0.11157951126604958	0.340764	0.327491	0.257313	0.270195	0.0573179	8	chr11_117167878_117167930_+@UTR3,chr11_117168348_117168400_+@UTR3,chr11_117168580_117168632_+@UTR3,chr11_117169194_117169246_+@UTR3,chr11_117169848_117169900_+@UTR3,chr11_117170042_117170094_+@UTR3,chr11_117170202_117170254_+@UTR3,chr11_117170776_117170828_+@UTR3	-0.02223986846458678,-0.010101167073068365,0.002289016444376901,-0.003955680690437419,0.010635119398339235,0.013467539044192761,0.008493041857329076,0.0015280295574382624	chr11_117167878_117167930_+@UTR3	-0.0222399	0.00296305	0.0273896	NA
CHKA	0.1155463142636815,0.8844536857363186	0.1708401950337434,0.8291598049662566	0.889211	0.836821	0.160692	0.213081	0.0876058	2	chr11_68052832_68052884_-@UTR3,chr11_68053794_68053846_-@UTR3	0.055311802799538096,-0.0549934337471768	chr11_68052832_68052884_-@UTR3	0.0553118	0.00500119	0.0368335	NA
RSL1D1	0.06242437605393008,0.3697733545839501,0.3268968302445411,0.2409054391175788	0.06831604730872365,0.3954144774522521,0.2976904603526729,0.2385790148863514	0.385549	0.372088	0.393382	0.403742	0.051272	4	chr16_11837312_11837364_-@UTR3,chr16_11837934_11837986_-@UTR3,chr16_11841910_11841962_-@UTR3,chr16_11846518_11846570_-@UTR3	0.006012549041413101,0.025704129527844122,-0.0290883222945173,-0.0022214909904337277	chr16_11841910_11841962_-@UTR3	-0.0290883	0.0061456	0.0418126	NA
SENP3-EIF4A1	0.49856383086195155,0.5014361691380484	0.5409978010406021,0.4590021989593979	0.639394	0.664865	0.642972	0.617842	-0.0563553	2	chr17_7578600_7578652_+@UTR3,chr17_7578690_7578741_+@UTR3	0.04250960013854621,-0.042289128007173216	chr17_7578600_7578652_+@UTR3	0.0425096	8.08e-06	0.00156962	NA
AC068896.3	0.19340100058518572,0.20355314887619613,0.033745023860742275,0.05686233299540918,0.08703360284845336,0.04248118751493871,0.3829237033190746	0.18710121604858446,0.14528181944449886,0.07139229268415871,0.06651325096301174,0.07048028890134153,0.06869551151847803,0.3905356204399267	0.272172	0.300612	0.282284	0.237447	-0.143384	7	chr10_124620016_124620068_-@UTR3,chr10_124621644_124621696_-@UTR3,chr10_124757808_124757860_-@UTR3,chr10_124758178_124758230_-@UTR3,chr10_124759438_124759490_-@UTR3,chr10_124759682_124759734_-@UTR3,chr10_124760278_124760330_-@UTR3	-0.006116621585676801,-0.05793150897776547,0.03774160323973658,0.009835321733331896,-0.016318344021074238,0.026341815298645842,0.00772310999193071	chr10_124621644_124621696_-@UTR3	-0.0579315	0.00736695	0.0460272	NA
NRF1	0.46776377217553694,0.3144179894179895,0.13519296607531903,0.0826252723311547	0.3723742138364779,0.16963836477987418,0.20303459119496856,0.2549528301886792	0.534909	0.433009	0.0997426	0.271253	0.304898	4	chr7_129755300_129755352_+@UTR3,chr7_129755978_129756030_+@UTR3,chr7_129756694_129756746_+@UTR3,chr7_129781204_129781256_+@UTR3-EX	-0.09168757919150522,-0.138709426590254,0.06865455146964544,0.17165808695624285	chr7_129781204_129781256_+@UTR3-EX	0.171658	0.000763285	0.0150332	NA
B4GALNT1	0.46160978484305476,0.26447296465336084,0.27391725050358445	0.5957461306273223,0.21748256055077672,0.18677130882190107	0.383588	0.289255	0.471884	0.603753	0.407216	3	chr12_57623604_57623656_-@UTR3,chr12_57629450_57629502_-@UTR3,chr12_57629584_57629636_-@UTR3	0.1318612465661566,-0.04854759890302254,-0.0884886606760805	chr12_57623604_57623656_-@UTR3	0.131861	7.86e-05	0.00468341	NA
TFAP2C	0.35377862950525946,0.13437247922715323,0.18865667805180766,0.3231922132157796	0.3518314270152505,0.14825027233115468,0.283380991285403,0.21653730936819168	0.415767	0.444159	0.409282	0.380223	-0.0953017	4	chr20_56638134_56638186_+@UTR3,chr20_56638406_56638458_+@UTR3,chr20_56638778_56638830_+@UTR3,chr20_56639086_56639138_+@UTR3	0.003204095957719144,0.020851397662991877,0.09982658243527806,-0.09923820141211451	chr20_56638778_56638830_+@UTR3	0.0998266	0.00717781	0.0453665	NA
TPCN2	0.4957516339869281,0.2781045751633987,0.2261437908496732	0.3529657477025898,0.38735728209412423,0.259676970203286	0.573057	0.490684	0.34736	0.426416	0.223884	3	chr11_69088378_69088430_+@UTR3,chr11_69089256_69089308_+@UTR3,chr11_69089968_69090020_+@UTR3	-0.14223006531550947,0.10595116834201745,0.031077518216625882	chr11_69088378_69088430_+@UTR3	-0.14223	0.00368331	0.0310426	NA
NCBP3	0.10169604952213647,0.08953489344793691,0.09438818830123179,0.1219486793399837,0.14384674906414036,0.15775958341175733,0.1266909258213606,0.16413493109145283	0.12630657133692816,0.05123743084928057,0.08455461551855044,0.11128178880891733,0.14081630385962426,0.22197247336844408,0.11620211485523908,0.14762870140301607	0.32477	0.334973	0.217338	0.205916	-0.0446253	8	chr17_3807348_3807400_-@UTR3,chr17_3807588_3807640_-@UTR3,chr17_3807732_3807784_-@UTR3,chr17_3809890_3809942_-@UTR3,chr17_3811524_3811576_-@UTR3,chr17_3811724_3811776_-@UTR3,chr17_3812116_3812167_-@UTR3,chr17_3812220_3812272_-@UTR3	0.025016450819032462,-0.03760398435178035,-0.009257778704016631,-0.01009896569631634,-0.0025165025567340793,0.06444282816514604,-0.00991813217171307,-0.01592316308467384	chr17_3811724_3811776_-@UTR3	0.0644428	0.00156141	0.0203912	NA
RNF4	0.45322610617671927,0.36109730748643853,0.18567658633684223	0.3679927425861231,0.4560955272216696,0.1759117301922073	0.582713	0.567307	0.301315	0.319203	0.0386545	3	chr4_2513900_2513952_+@UTR3,chr4_2514428_2514480_+@UTR3,chr4_2515620_2515672_+@UTR3	-0.08506277281847219,0.09466027689392653,-0.009829191424869571	chr4_2514428_2514480_+@UTR3	0.0946603	9.03e-05	0.00511223	NA
HIVEP3	0.3864357864357865,0.6135642135642135	0.672979797979798,0.32702020202020204	0.628837	0.354236	0.411175	0.685776	0.827974	2	chr1_41508974_41509026_-@UTR3,chr1_41510194_41510246_-@UTR3	0.2658908373001791,-0.27800900715323923	chr1_41510194_41510246_-@UTR3	-0.278009	0.000290103	0.00892401	NA
RPS12	0.9584370020549051,0.03356640136582118,0.007996596579273747	0.8788460800897715,0.0654527222659883,0.055701197644240176	0.777717	0.73493	0.0283588	0.0810757	0.0816389	3	chr6_132817538_132817589_+@UTR3,chr6_132818368_132818420_+@UTR3-EX,chr6_132821196_132821248_+@UTR3-EX	-0.0793863155752238,0.03186121917581747,0.04763356886906867	chr6_132817538_132817589_+@UTR3	-0.0793863	1.83e-05	0.00244743	NA
SLC25A11	0.037576743131441014,0.059689493820472304,0.3448336141855146,0.557900148862572	0.058155122045575436,0.09187865702931881,0.3538456232274874,0.49612059769761824	0.605766	0.583921	0.127818	0.157569	0.0529885	4	chr17_4935794_4935846_-@UTR3-EX,chr17_4936962_4937014_-@UTR3-EX,chr17_4937290_4937342_-@UTR3,chr17_4937572_4937624_-@UTR3	0.021009240114005408,0.032546618209732994,0.009319305630236252,-0.06127056720300772	chr17_4937572_4937624_-@UTR3	-0.0612706	0.003298	0.0291027	NA
PPP1R3B	0.1274061368400991,0.11628413515205967,0.11014457240872334,0.20986822401916738,0.06797761986441232,0.22941680960548883,0.13890250211004926	0.13999405209988755,0.09259439968030037,0.20678711164394384,0.125705151439113,0.1060584938801684,0.19711480376576426,0.13174598749082259	0.334188	0.319352	0.300227	0.312953	0.0655124	7	chr8_9137184_9137236_-@UTR3,chr8_9137716_9137768_-@UTR3,chr8_9138150_9138202_-@UTR3,chr8_9138368_9138420_-@UTR3,chr8_9138798_9138850_-@UTR3,chr8_9140116_9140168_-@UTR3,chr8_9140618_9140670_-@UTR3	0.015905435070018542,-0.019956582542286896,0.09868271470955924,-0.07957961422025234,0.04121052231251697,-0.028744480684692514,-0.0036759178107834967	chr8_9138150_9138202_-@UTR3	0.0986827	0.006507	0.0430317	NA
C11orf58	0.8069325677252605,0.1533906525752198,0.03967677969951963	0.7433953631317642,0.18802888860032968,0.06857574826790601	0.734461	0.705477	0.0898773	0.12527	0.0580876	3	chr11_16755062_16755114_+@UTR3,chr11_16755748_16755800_+@UTR3,chr11_16757936_16757988_+@UTR3	-0.0634912923068841,0.03431166408073849,0.02854305698022569	chr11_16755062_16755114_+@UTR3	-0.0634913	9.47e-06	0.0015796	NA
AAGAB	0.174111875235912,0.3621708141151343,0.46371731064895366	0.18637825614746442,0.40634887651913815,0.40727286733339735	0.582837	0.552091	0.348912	0.378753	0.0781853	3	chr15_67201692_67201744_-@UTR3,chr15_67202150_67202202_-@UTR3,chr15_67202684_67202736_-@UTR3	0.01222991581640498,0.04408163802408538,-0.05634609461536849	chr15_67202684_67202736_-@UTR3	-0.0563461	0.00374028	0.0313539	NA
SPEN	0.6315802848027595,0.36841971519724054	0.5154623154623155,0.48453768453768453	0.682757	0.5869	0.465514	0.561371	0.218257	2	chr1_15940108_15940160_+@UTR3,chr1_15940374_15940426_+@UTR3	-0.11431053003377345,0.1156137687996841	chr1_15940374_15940426_+@UTR3	0.115614	0.00338239	0.0296798	NA
CLTC	0.4226215390137759,0.5773784609862241	0.4674773452990227,0.5325226547009774	0.473845	0.514393	0.613741	0.573192	-0.118456	2	chr17_59693984_59694036_+@UTR3,chr17_59694496_59694548_+@UTR3	0.044762988400198434,-0.04482074127154778	chr17_59694496_59694548_+@UTR3	-0.0448207	0.000210358	0.00781388	NA
EMG1	0.46779055667423397,0.1114991884808958,0.10991838706425949,0.31079186778061074	0.3679142269855174,0.09668801587340459,0.1484667707632227,0.3869309863778552	0.454273	0.393187	0.368377	0.443036	0.208344	4	chr12_6975812_6975864_+@UTR3,chr12_6975950_6976002_+@UTR3,chr12_6976174_6976226_+@UTR3,chr12_6976558_6976610_+@UTR3	-0.09917002321732399,-0.014203896309779168,0.03895538827784409,0.07627532114066254	chr12_6975812_6975864_+@UTR3	-0.09917	0.000497792	0.0119536	NA
POT1	0.16842105263157894,0.39282028600914054,0.4387586613592806	0.2688263815598281,0.43208165720899167,0.29909196123118026	0.595304	0.509392	0.382661	0.471943	0.224849	3	chr7_124823574_124823626_-@UTR3,chr7_124823752_124823804_-@UTR3,chr7_124823896_124823948_-@UTR3	0.0980504867244856,0.03773043669737497,-0.13959628435657206	chr7_124823896_124823948_-@UTR3	-0.139596	0.000170699	0.00706986	NA
MYORG	0.22442455242966752,0.1714443023586246,0.2149225632281898,0.38920858198351804	0.17731481481481481,0.3902777777777778,0.19305555555555556,0.2393518518518519	0.464216	0.449299	0.28714	0.308826	0.047119	4	chr9_34366972_34367024_-@UTR3,chr9_34368882_34368934_-@UTR3,chr9_34369670_34369722_-@UTR3,chr9_34369810_34369862_-@UTR3	-0.04354627343155629,0.21570941608200164,-0.018856064193842365,-0.14387001122955634	chr9_34368882_34368934_-@UTR3	0.215709	0.00025374	0.00860978	NA
MYPN	0.4563176158399673,0.5027556644213105,0.040926719738722195	0.4530033025123339,0.38797613668507114,0.159020560802595	0.669788	0.60441	0.219539	0.298522	0.148178	3	chr10_68211066_68211118_+@UTR3,chr10_68211216_68211268_+@UTR3,chr10_68211676_68211728_+@UTR3	-0.0064321560402187394,-0.11567370384759607,0.11142625645505183	chr10_68211216_68211268_+@UTR3	-0.115674	0.00284889	0.0267471	NA
RRM2B	0.3063333335849159,0.08564997911025977,0.06717795794444956,0.13625515471741656,0.24091605536292718,0.16366751928003104	0.3038145701561325,0.0974094473964955,0.06258009088853723,0.14900861074849547,0.18375918679351277,0.20342809401682657	0.328161	0.326046	0.304333	0.306589	0.00932826	6	chr8_102205114_102205166_-@UTR3,chr8_102205382_102205434_-@UTR3,chr8_102205866_102205918_-@UTR3,chr8_102207682_102207734_-@UTR3,chr8_102207918_102207970_-@UTR3,chr8_102208064_102208116_-@UTR3	-0.002369251546375517,0.011920685961836888,-0.004369384104673232,0.012912003910110048,-0.05679594484819961,0.03981765228358328	chr8_102207918_102207970_-@UTR3	-0.0567959	0.0016045	0.0206244	NA
BCLAF3	0.1014676616915423,0.25987788331071915,0.08171867933061965,0.10740388964269561,0.1052555404794211,0.34427634554500236	0.145864898989899,0.25004208754208757,0.13120791245791247,0.10765993265993266,0.1724010942760943,0.1928240740740741	0.385861	0.323294	0.294819	0.349933	0.255234	6	chrX_19913354_19913406_-@UTR3,chrX_19913786_19913838_-@UTR3,chrX_19914496_19914548_-@UTR3,chrX_19915554_19915606_-@UTR3,chrX_19916084_19916136_-@UTR3,chrX_19917148_19917200_-@UTR3	0.04321965029169257,-0.009794499764757547,0.04834049148325423,-0.00020092450693903752,0.06566480813010887,-0.14942771115937012	chrX_19917148_19917200_-@UTR3	-0.149428	0.00114544	0.0177317	NA
ATP6V1C1	0.3841427569565739,0.1658011260379584,0.047672362119204094,0.07098393999140949,0.11379718475024947,0.08200216363351621,0.07331491890310975,0.06228554760797859	0.3455327310664653,0.15859457994864876,0.054704530888518864,0.09796200479342747,0.12408183653720208,0.09039644343628557,0.07713476619227418,0.051593107137177796	0.389802	0.383064	0.178903	0.186299	0.0251551	8	chr8_103068740_103068792_+@UTR3,chr8_103069242_103069294_+@UTR3,chr8_103069536_103069588_+@UTR3,chr8_103070056_103070108_+@UTR3,chr8_103070406_103070458_+@UTR3,chr8_103072280_103072332_+@UTR3,chr8_103072464_103072516_+@UTR3,chr8_103072992_103073044_+@UTR3	-0.03850309916935157,-0.007131656227363392,0.007091951958999289,0.027006107692144884,0.010333342547306196,0.008451378959639932,0.003878855514909546,-0.010606352946828816	chr8_103068740_103068792_+@UTR3	-0.0385031	0.00746845	0.0462682	NA
SERINC3	0.12137454272206755,0.2536273864985506,0.19249633071069375,0.17854071897949447,0.2539610210891937	0.17676368775115273,0.2260448447996539,0.1914980824803839,0.16226149277314955,0.2434318921956599	0.392302	0.373102	0.329999	0.349775	0.072392	5	chr20_44497508_44497560_-@UTR3,chr20_44497910_44497962_-@UTR3,chr20_44499178_44499230_-@UTR3,chr20_44499570_44499622_-@UTR3,chr20_44500160_44500212_-@UTR3	0.0554510728357812,-0.02738597322059627,-0.0008355987665422393,-0.016088386721852754,-0.010369024125657017	chr20_44497508_44497560_-@UTR3	0.0554511	0.00439622	0.0340899	NA
ATP2A2	0.32420600835698576,0.2023039105009787,0.2310555059147612,0.06773055971600081,0.05387244061282989,0.06904341831748492,0.05178815658095856	0.29543738568047834,0.20158068379435987,0.23199137672901834,0.07927627450945114,0.07489046028663558,0.07919613324686363,0.037627685753193106	0.432571	0.423224	0.139684	0.149775	0.0315157	7	chr12_110346478_110346530_+@UTR3,chr12_110346650_110346702_+@UTR3,chr12_110347138_110347190_+@UTR3,chr12_110347596_110347648_+@UTR3,chr12_110350404_110350456_+@UTR3,chr12_110350722_110350774_+@UTR3,chr12_110350936_110350988_+@UTR3	-0.02877611512065764,-0.0007623045602876688,0.0008969791805661931,0.01148944842877582,0.02095226543318897,0.01009797850626698,-0.01419722184639987	chr12_110346478_110346530_+@UTR3	-0.0287761	0.000444363	0.0113009	NA
ALDH1A3	0.3232381487353895,0.26660783262251825,0.3508330421402171,0.05932097650187528	0.3495640041059087,0.2418421326062358,0.33214472072170825,0.07644914256614727	0.489946	0.493543	0.332876	0.329418	-0.0105539	4	chr15_100915312_100915364_+@UTR3,chr15_100915652_100915704_+@UTR3,chr15_100916094_100916146_+@UTR3,chr15_100916366_100916418_+@UTR3	0.026567357247687218,-0.024429608541023357,-0.018393381771851736,0.017489204346383465	chr15_100915312_100915364_+@UTR3	0.0265674	0.00375494	0.031427	NA
MARVELD2	0.4088847468157813,0.5911152531842186	0.6100589225589226,0.3899410774410774	0.46526	0.645584	0.628604	0.448279	-0.472569	2	chr5_69442028_69442080_+@UTR3,chr5_69442500_69442552_+@UTR3	0.1874924863801164,-0.20447220464729993	chr5_69442500_69442552_+@UTR3	-0.204472	0.000110964	0.00587056	NA
AL589666.1	0.08859350090465164,0.08853703520308265,0.12978753104646856,0.09457392990320686,0.16347317541122375,0.14934550597877216,0.19728618384494082,0.08840313770765351	0.0696459943902288,0.09286825445286355,0.12793525157173744,0.11805560996863847,0.15355138606757054,0.16121398215369034,0.16996116701511252,0.10676835438015835	0.298464	0.305249	0.307585	0.302769	-0.0324291	8	chr6_85609406_85609458_-@UTR3,chr6_85610034_85610086_-@UTR3,chr6_85610468_85610520_-@UTR3,chr6_85610736_85610788_-@UTR3,chr6_85611356_85611408_-@UTR3,chr6_85611864_85611916_-@UTR3,chr6_85612618_85612670_-@UTR3,chr6_85614566_85614618_-@UTR3	-0.018871702460231232,0.004374479386635599,-0.0018021240793836546,0.02349304229993343,-0.009860811533577818,0.011903851453227005,-0.027242504800735312,0.01838962035211071	chr6_85612618_85612670_-@UTR3	-0.0272425	0.00636401	0.0427418	NA
RBM22	0.18929190269953503,0.27952175311790384,0.3121543653002135,0.2190319788823477	0.162442392183508,0.3248122343596049,0.3382790259408715,0.17446634751601564	0.436743	0.430088	0.38507	0.392156	0.0221522	4	chr5_150690816_150690868_-@UTR3,chr5_150691088_150691140_-@UTR3,chr5_150691454_150691506_-@UTR3,chr5_150691640_150691692_-@UTR3	-0.026997911265487146,0.04499558168193829,0.025880827062159162,-0.04464991105545302	chr5_150691088_150691140_-@UTR3	0.0449956	0.00109908	0.0173855	NA
PIAS1	0.25049632882035994,0.16396246146821145,0.12466349217533183,0.07834274424862105,0.10091942457491511,0.12373242628103047,0.10463277379109023,0.05325034864044008	0.22577052577052573,0.15938875938875935,0.11284641284641282,0.07860657860657859,0.07635845635845635,0.14306656306656304,0.1187101787101787,0.08525252525252525	0.365235	0.342486	0.227088	0.25211	0.0927775	8	chr15_68187866_68187918_+@UTR3,chr15_68188498_68188550_+@UTR3,chr15_68188640_68188692_+@UTR3,chr15_68188924_68188976_+@UTR3,chr15_68189508_68189560_+@UTR3,chr15_68190074_68190126_+@UTR3,chr15_68190680_68190732_+@UTR3,chr15_68191214_68191266_+@UTR3	-0.02475065681920044,-0.0046525938036275916,-0.011883065391120787,0.00017086625475790096,-0.024599810030685287,0.019208084306358758,0.013959117942357754,0.03184040246901292	chr15_68191214_68191266_+@UTR3	0.0318404	0.00072375	0.0147767	NA
P2RX5-TAX1BP3	0.21254748338081672,0.7874525166191834	0.4343434343434343,0.5656565656565656	0.796007	0.584139	0.246836	0.458704	0.446469	2	chr17_3672132_3672184_-@UTR3,chr17_3673266_3673318_-@UTR3	0.21991959746861708,-0.20183343707853507	chr17_3672132_3672184_-@UTR3	0.21992	0.00500566	0.0368335	NA
SUFU	0.36983836241524476,0.6301616375847553	0.5997426370989589,0.4002573629010411	0.443468	0.643822	0.670331	0.469977	-0.537831	2	chr10_102630236_102630288_+@UTR3,chr10_102630610_102630662_+@UTR3	0.22603031326435585,-0.223887302610707	chr10_102630236_102630288_+@UTR3	0.22603	0.00395877	0.0324086	NA
NUDT4	0.1738756947394506,0.17931007652459174,0.2557419520218878,0.1382314729824952,0.20869629624010466,0.04414450749147011	0.16513086085831427,0.14756984879282864,0.26660657214320244,0.17897299107778897,0.17910411725973752,0.06261560986812818	0.397388	0.386461	0.270027	0.282561	0.0402283	6	chr12_93399804_93399856_+@UTR3,chr12_93400102_93400154_+@UTR3,chr12_93400464_93400516_+@UTR3,chr12_93401154_93401206_+@UTR3,chr12_93401624_93401676_+@UTR3,chr12_93402250_93402302_+@UTR3	-0.008919946738798396,-0.031890928530385027,0.010647805759753659,0.04041416962500216,-0.029711968221076496,0.018174255083282742	chr12_93401154_93401206_+@UTR3	0.0404142	0.00559082	0.0395121	NA
ZMIZ1	0.1865306232068154,0.15618903077225194,0.114945714232926,0.21496443773217472,0.27834300650636834,0.04902718754946346	0.16980881699758943,0.2320788280948118,0.1373557326710753,0.1448286359217226,0.25215728903245144,0.06377069728234937	0.322427	0.353607	0.332244	0.303306	-0.133175	6	chr10_79313374_79313426_+@UTR3,chr10_79313708_79313760_+@UTR3,chr10_79314532_79314584_+@UTR3,chr10_79315774_79315826_+@UTR3,chr10_79315952_79316004_+@UTR3,chr10_79316342_79316394_+@UTR3	-0.018432350071391906,0.07377154208020431,0.02044224391912479,-0.07149159667209026,-0.02760564347564448,0.012643649416045878	chr10_79313708_79313760_+@UTR3	0.0737715	0.00264447	0.0259921	NA
CHORDC1	0.03369663588098474,0.044472350729607445,0.07824085884800891,0.11928449506814094,0.29244606821488517,0.43185959125837275	0.0514053410875118,0.06983689839455516,0.07099514365046153,0.10802882808136689,0.268492581558924,0.43124120722718057	0.50775	0.491041	0.133793	0.153941	0.0482754	6	chr11_90200778_90200830_-@UTR3,chr11_90201184_90201236_-@UTR3,chr11_90201724_90201776_-@UTR3,chr11_90201994_90202046_-@UTR3,chr11_90202336_90202388_-@UTR3,chr11_90202474_90202526_-@UTR3	0.017825917674481495,0.025465543980775926,-0.007090905364236219,-0.011105045309727904,-0.023806890910534728,-0.0005313025448825948	chr11_90201184_90201236_-@UTR3	0.0254655	0.00259228	0.0256678	NA
ASPH	0.14228529253891573,0.10810386473429952,0.09931696188942567,0.20820383789586686,0.19091586151368758,0.09733762748255502,0.15383655394524962	0.11399258093161012,0.08599270601572961,0.07783895600574363,0.23758260395918163,0.18485513458172934,0.1285375931846898,0.17120042532131588	0.325257	0.361147	0.204433	0.163125	-0.151006	7	chr8_61502274_61502326_-@UTR3,chr8_61502548_61502600_-@UTR3,chr8_61502778_61502830_-@UTR3,chr8_61624634_61624686_-@UTR3,chr8_61624798_61624850_-@UTR3,chr8_61625608_61625660_-@UTR3,chr8_61625890_61625942_-@UTR3	-0.028929750864326434,-0.022776967139751317,-0.022151452085548917,0.02875173339783199,-0.006674609718391622,0.03048738669050087,0.016700772689219323	chr8_61625608_61625660_-@UTR3	0.0304874	9.45e-06	0.0015796	NA
CAST	0.5400560441694643,0.2780403037113078,0.18190365211922796	0.46552883983717774,0.32832338471398237,0.2061477754488398	0.607767	0.574412	0.280406	0.318162	0.0814329	3	chr5_96772606_96772658_+@UTR3,chr5_96773184_96773236_+@UTR3,chr5_96774302_96774354_+@UTR3	-0.07467816650289266,0.04979544187165236,0.023740006845519274	chr5_96772606_96772658_+@UTR3	-0.0746782	0.000927745	0.0165781	NA
GM2A	0.1876992110966176,0.17873100903251196,0.21183794605829978,0.25957286886195424,0.0979010177312505,0.06425794721936584	0.2387297949193097,0.1798873832480291,0.21188470552864844,0.23528285177999475,0.0840233074127154,0.05019195711130252	0.416686	0.435277	0.243615	0.219322	-0.0629716	6	chr5_151267444_151267496_+@UTR3,chr5_151267830_151267882_+@UTR3,chr5_151268100_151268152_+@UTR3,chr5_151268460_151268512_+@UTR3,chr5_151269206_151269258_+@UTR3,chr5_151270156_151270208_+@UTR3	0.05089101721590733,0.0011067009054624988,1.1442680691864382e-08,-0.02428316938227329,-0.013905829968780273,-0.014096139954515495	chr5_151267444_151267496_+@UTR3	0.050891	0.00179057	0.0217752	NA
SETDB2	0.6180555555555555,0.3819444444444444	0.9188034188034188,0.0811965811965812	0.665416	0.921126	0.464662	0.208952	-0.469143	2	chr13_49491824_49491876_+@UTR3,chr13_49492140_49492192_+@UTR3	0.27862945877651746,-0.26658978276625334	chr13_49491824_49491876_+@UTR3	0.278629	0.000375021	0.0103746	NA
ZNF70	0.40149505666747043,0.5985049433325296	0.16436925647451964,0.8356307435254804	0.609221	0.839799	0.417651	0.187074	-0.463078	2	chr22_23741564_23741616_-@UTR3,chr22_23743420_23743472_-@UTR3	-0.22183770067828038,0.22903967208315035	chr22_23743420_23743472_-@UTR3	0.22904	0.000276891	0.00868789	NA
PRKCA	0.18335534479112156,0.17277231406871926,0.20362360553773695,0.0609212325514523,0.1026844342889897,0.17087261548934363,0.10577045327263652	0.18380480459096138,0.184669501802593,0.1884321621343625,0.09189509954303801,0.09749694150463216,0.18664466645667244,0.06705682396774042	0.364104	0.377862	0.221941	0.196841	-0.0535099	7	chr17_66804214_66804266_+@UTR3,chr17_66804602_66804654_+@UTR3,chr17_66804952_66805004_+@UTR3,chr17_66805292_66805344_+@UTR3,chr17_66805602_66805654_+@UTR3,chr17_66807038_66807090_+@UTR3,chr17_66810670_66810722_+@UTR3	0.00031286232709387685,0.011710301682363644,-0.015280115460980792,0.030729038884760612,-0.005321010500805176,0.01559173780460854,-0.038750271720599846	chr17_66810670_66810722_+@UTR3	-0.0387503	0.00162349	0.0206802	NA
TRAF7	0.3959116725421073,0.4684292988640815,0.1356590285938112	0.32468608813002403,0.5555658237008351,0.1197480881691408	0.574219	0.551467	0.351198	0.374081	0.0583253	3	chr16_2176912_2176964_+@UTR3,chr16_2177444_2177496_+@UTR3,chr16_2177992_2178044_+@UTR3	-0.0710798642032191,0.08687360038299763,-0.015928766265853253	chr16_2177444_2177496_+@UTR3	0.0868736	0.000620745	0.0134705	NA
URB2	0.5115629107926926,0.18470588688817188,0.3037312023191356	0.47757026976042255,0.3407281644972647,0.18170156574231278	0.53688	0.590532	0.363661	0.303755	-0.137416	3	chr1_229659428_229659480_+@UTR3,chr1_229660030_229660082_+@UTR3,chr1_229661106_229661158_+@UTR3-EX	-0.030115814889466908,0.15546168094503962,-0.11642403190029207	chr1_229660030_229660082_+@UTR3	0.155462	0.00754268	0.0462907	NA
GAS2L3	0.26023932310852144,0.12615810506105865,0.29332931484830216,0.22360859955796664,0.09666465742415108	0.2127470769363768,0.086355500728562,0.3660991447216506,0.2414477852510837,0.09335049236232679	0.356572	0.316687	0.337369	0.374611	0.171139	5	chr12_100624908_100624960_+@UTR3,chr12_100625106_100625158_+@UTR3,chr12_100626760_100626812_+@UTR3,chr12_100627584_100627636_+@UTR3,chr12_100627776_100627828_+@UTR3	-0.047923269066360186,-0.04031614299427426,0.07175421721109626,0.017013464980566245,-0.0038251870914562947	chr12_100626760_100626812_+@UTR3	0.0717542	0.00636001	0.0427418	NA
ELK4	0.07092876264335765,0.04598001990810169,0.058438272448529505,0.06516243729111344,0.11285781451049397,0.14019092099019995,0.05565881280611262,0.05999842793153421,0.11059154701476293,0.09609779363275024,0.09716238682455684,0.08693280399848698	0.05968502800552795,0.05985854159800911,0.0751285894546183,0.06963793074139994,0.09838298086244175,0.14163459831810712,0.05833715050701064,0.03775020379893374,0.12303538156818368,0.0970915359225782,0.1020739588757703,0.07738410034741926	0.254529	0.251436	0.22009	0.223411	0.0176382	12	chr1_205608952_205609004_-@UTR3,chr1_205609698_205609750_-@UTR3,chr1_205610350_205610402_-@UTR3,chr1_205610786_205610838_-@UTR3,chr1_205611226_205611278_-@UTR3,chr1_205611408_205611460_-@UTR3,chr1_205614258_205614310_-@UTR3,chr1_205614424_205614476_-@UTR3,chr1_205614856_205614908_-@UTR3,chr1_205615610_205615662_-@UTR3,chr1_205616072_205616124_-@UTR3,chr1_205616316_205616368_-@UTR3	-0.011238546090488313,0.013851726394909863,0.016662556490783013,0.004463198231034957,-0.014465629960804943,0.0014365481201186747,0.002664768693289264,-0.02223187674065008,0.012424333197216128,0.0009837369125467732,0.004899400849371266,-0.009546289257959278	chr1_205614424_205614476_-@UTR3	-0.0222319	0.000867065	0.0160729	NA
PITHD1	0.7739900247842906,0.22600997521570942	0.6776165656135872,0.32238343438641276	0.79039	0.70255	0.290934	0.378774	0.169963	2	chr1_23787640_23787692_+@UTR3,chr1_23788198_23788250_+@UTR3	-0.09565912569793533,0.09658665443644943	chr1_23788198_23788250_+@UTR3	0.0965867	0.00236297	0.0246664	NA
NCKAP1	0.40520891466182324,0.5947910853381767	0.44392428982693466,0.5560757101730655	0.621801	0.585902	0.446013	0.481911	0.0857923	2	chr2_182924970_182925022_-@UTR3,chr2_182925656_182925708_-@UTR3	0.038588892067246416,-0.038695518637717474	chr2_182925656_182925708_-@UTR3	-0.0386955	0.00220132	0.0239236	NA
GINS2	0.07278679884043869,0.14517829268787122,0.36472460418820574,0.4173103042834844	0.09968802800862293,0.2502616160951216,0.32256072784889145,0.32748962804736403	0.552062	0.524646	0.14131	0.184001	0.0734864	4	chr16_85676176_85676228_-@UTR3,chr16_85677656_85677708_-@UTR3,chr16_85677914_85677965_-@UTR3,chr16_85678014_85678066_-@UTR3	0.028966672687510436,0.10585944469693143,-0.04040844222644324,-0.0866337996573946	chr16_85677656_85677708_-@UTR3	0.105859	0.00216898	0.0238567	NA
KRAS	0.09770722240105996,0.11687339120357983,0.22335464018075146,0.19729647190184654,0.1679307887878707,0.10689136371050167,0.08994612181438984	0.09563920271042882,0.12367081350489,0.18476267829812562,0.1757097172900518,0.1948440390483189,0.10263102295955484,0.12274252618863006	0.300167	0.318479	0.335904	0.318126	-0.0854347	7	chr12_25205328_25205380_-@UTR3,chr12_25206386_25206438_-@UTR3,chr12_25206770_25206822_-@UTR3,chr12_25206906_25206958_-@UTR3,chr12_25208344_25208396_-@UTR3,chr12_25208934_25208986_-@UTR3,chr12_25209740_25209792_-@UTR3	-0.001589911660961077,0.007243694128637221,-0.0380801133798159,-0.02110894182222356,0.027281059435756372,-0.0037853267023359033,0.033189082998908104	chr12_25206770_25206822_-@UTR3	-0.0380801	0.000450373	0.0114136	NA
TRIM41	0.7847331826131467,0.09807397296199924,0.11719284442485399	0.717493752276659,0.15742803219243373,0.12507821553090737	0.733297	0.704877	0.1792	0.208859	0.057026	3	chr5_181235278_181235330_+@UTR3,chr5_181235776_181235828_+@UTR3,chr5_181236396_181236448_+@UTR3-EX	-0.06695028454279939,0.058285487831320495,0.007158859689572486	chr5_181235278_181235330_+@UTR3	-0.0669503	0.00747888	0.0462682	NA
ADAM10	0.20754806039588267,0.20059927435169897,0.15758092296621654,0.17201640812996835,0.2622553341562335	0.216895731382592,0.20831665272942734,0.1804288486224697,0.1776160893668925,0.2167426778986186	0.376535	0.356829	0.34845	0.36835	0.077552	5	chr15_58595600_58595652_-@UTR3,chr15_58595916_58595968_-@UTR3,chr15_58596272_58596324_-@UTR3,chr15_58596980_58597032_-@UTR3,chr15_58597158_58597210_-@UTR3	0.00912064848091812,0.007499008755828429,0.022593253578559347,0.005369223254227534,-0.045649428428967354	chr15_58597158_58597210_-@UTR3	-0.0456494	0.00189396	0.022155	NA
MDFIC	0.28302325581395343,0.35502038472581104,0.04705770887166236,0.1687074361182888,0.10071260407694514,0.04547861039333907	0.19564252957168135,0.41794728941300274,0.058505372683143236,0.17584188371481188,0.09550724525537656,0.05655567936198421	0.457665	0.430475	0.24994	0.273971	0.0883645	6	chr7_115016194_115016246_+@UTR3,chr7_115016948_115017000_+@UTR3,chr7_115017290_115017342_+@UTR3,chr7_115017574_115017626_+@UTR3,chr7_115017980_115018032_+@UTR3,chr7_115018406_115018458_+@UTR3	-0.08831487701235477,0.06100277052075964,0.00930336574335884,0.005376604495122839,-0.007164787015093321,0.008942304770006015	chr7_115016194_115016246_+@UTR3	-0.0883149	0.00769309	0.0468962	NA
TMEM126A	0.9937694704049845,0.006230529595015577	0.8691736443381181,0.13082635566188197	0.993777	0.869354	0.00760386	0.132027	0.192979	2	chr11_85656454_85656506_+@UTR3,chr11_85694030_85694082_+@UTR3-EX	-0.12316928983595643,0.12214625714625715	chr11_85656454_85656506_+@UTR3	-0.123169	3.22e-05	0.00319268	NA
PTPN4	0.23117999801764297,0.07979721221866132,0.06241533683549741,0.16405243334324512,0.18994375979706538,0.06908468335517597,0.08296485354419737,0.07114229652390024,0.04941942636461419	0.1739340180516651,0.07871148459383755,0.05949657640834113,0.11777544351073764,0.19727668845315907,0.09520697167755993,0.12433473389355743,0.0509414877061936,0.10232259570494864	0.338663	0.305202	0.204759	0.242579	0.150088	9	chr2_119977056_119977108_+@UTR3,chr2_119977682_119977734_+@UTR3,chr2_119978406_119978458_+@UTR3,chr2_119978626_119978678_+@UTR3,chr2_119979856_119979908_+@UTR3,chr2_119980584_119980636_+@UTR3,chr2_119981428_119981480_+@UTR3,chr2_119983612_119983664_+@UTR3,chr2_119983784_119983836_+@UTR3	-0.05613418486779609,-0.000280174314310766,-0.002124236956439096,-0.04519734794070787,0.007965950206771627,0.02666936694502975,0.041821493549728125,-0.019235088652479963,0.053269551212706275	chr2_119977056_119977108_+@UTR3	-0.0561342	0.00186554	0.022155	NA
ARHGAP35	0.6144195578978188,0.19016066461718636,0.19541977748499487	0.5766363572836588,0.25367023565346913,0.16969340706287206	0.638248	0.609721	0.278918	0.300696	0.065967	3	chr19_47001406_47001458_+@UTR3,chr19_47004476_47004528_+@UTR3,chr19_47004952_47005004_+@UTR3	-0.03765462432172251,0.06318893954590979,-0.02566312090206893	chr19_47004476_47004528_+@UTR3	0.0631889	0.00277047	0.0265112	NA
DYNC1LI1	0.1093356537778888,0.2841830771836737,0.6064812690384375	0.07329337123552919,0.21672434392122933,0.7099822848432416	0.675482	0.73945	0.27987	0.220206	-0.130535	3	chr3_32526076_32526128_-@UTR3,chr3_32526346_32526398_-@UTR3,chr3_32526736_32526788_-@UTR3	-0.0324638529261749,-0.06421465357567849,0.10376713740682864	chr3_32526736_32526788_-@UTR3	0.103767	0.00439764	0.0340899	NA
NOL7	0.7925013683634373,0.2074986316365627	0.6328482328482328,0.36715176715176717	0.813456	0.677179	0.31411	0.450387	0.264526	2	chr6_13621178_13621230_+@UTR3,chr6_13621502_13621554_+@UTR3	-0.15682118489703945,0.15686860267021427	chr6_13621502_13621554_+@UTR3	0.156869	0.000807776	0.0153789	NA
NPLOC4	0.08987813655680205,0.2864041586812191,0.2910346822411908,0.2600396121713518,0.0726434103494361	0.07879107255134012,0.3213354313247194,0.25504701745634023,0.25912480311372826,0.08570167555387186	0.188201	0.197466	0.451845	0.44649	-0.0693239	5	chr17_81556866_81556918_-@UTR3,chr17_81557406_81557458_-@UTR3,chr17_81558130_81558182_-@UTR3,chr17_81558626_81558678_-@UTR3,chr17_81565202_81565254_-@UTR3	-0.011121920827162055,0.034842148673043805,-0.035973457088006866,-0.0009570926894210685,0.012988823829907625	chr17_81558130_81558182_-@UTR3	-0.0359735	0.000993253	0.016806	NA
PRORP	0.4723175530404447,0.22545303870605077,0.03930932967077547,0.038154348997722506,0.055554396518251954,0.08007267163893671,0.0891386614278181	0.406805089970331,0.2030656816693113,0.06638902316425146,0.09892760689778375,0.0382293779314355,0.1158797546613984,0.07070346570548859	0.457225	0.432149	0.164715	0.190504	0.0813739	7	chr14_35273658_35273710_+@UTR3,chr14_35274038_35274090_+@UTR3,chr14_35274848_35274900_+@UTR3,chr14_35275262_35275314_+@UTR3,chr14_35275458_35275510_+@UTR3,chr14_35276734_35276786_+@UTR3,chr14_35276976_35277028_+@UTR3	-0.06602625459321093,-0.023450460670395634,0.025460936485268433,0.058955370133338146,-0.018712209776226507,0.0342256683769261,-0.01978318697056125	chr14_35273658_35273710_+@UTR3	-0.0660263	0.000937174	0.0165781	NA
TUBA1B	0.2785569375078431,0.7214430624921568	0.29972737014398954,0.7002726298560105	0.767032	0.751514	0.442401	0.457918	0.0294862	2	chr12_49127838_49127890_-@UTR3,chr12_49127998_49128050_-@UTR3	0.021128886575069172,-0.021177304203369607	chr12_49127998_49128050_-@UTR3	-0.0211773	0.00438564	0.0340899	NA
MMAB	0.051072501072501074,0.052145002145002145,0.17415272415272418,0.7226297726297726	0.09243881118881118,0.14630681818181818,0.11396416083916083,0.6472902097902097	0.64261	0.580871	0.110349	0.18391	0.145725	4	chr12_109555030_109555082_-@UTR3,chr12_109555738_109555790_-@UTR3,chr12_109556528_109556580_-@UTR3,chr12_109556740_109556792_-@UTR3	0.04195467212493585,0.09380760120391839,-0.058123141832779446,-0.07364211836561496	chr12_109555738_109555790_-@UTR3	0.0938076	0.00757698	0.0463834	NA
BUD23	0.8311063804088534,0.16889361959114654	0.7409347758184968,0.2590652241815033	0.832304	0.742786	0.174891	0.26441	0.164164	2	chr7_73697988_73698040_+@UTR3,chr7_73705136_73705188_+@UTR3	-0.08990014413699343,0.08967582345670935	chr7_73697988_73698040_+@UTR3	-0.0899001	0.00305996	0.0280742	NA
RAC1	0.32729950113185036,0.15994931231274379,0.5127511865554059	0.3515140955666016,0.15788265979429866,0.4906032446390996	0.395573	0.412533	0.56108	0.541717	-0.0605648	3	chr7_6403272_6403324_+@UTR3,chr7_6403446_6403498_+@UTR3,chr7_6403810_6403862_+@UTR3	0.02416310576674424,-0.0021170818615262044,-0.02216815927044713	chr7_6403272_6403324_+@UTR3	0.0241631	0.00284236	0.0267204	NA
ZNF701	0.7162124679287151,0.283787532071285	0.9005537098560353,0.09944629014396456	0.734887	0.905391	0.334921	0.164417	-0.301019	2	chr19_52583876_52583928_+@UTR3,chr19_52584540_52584592_+@UTR3	0.17666608614884483,-0.18629977940322767	chr19_52584540_52584592_+@UTR3	-0.1863	6.02e-05	0.00425729	NA
NEDD4	0.12277764924644913,0.09882975705351627,0.08753032202526767,0.0910842364631222,0.11395896166360557,0.24624076024471253,0.2395783133033266	0.09509575949277675,0.09440604051089785,0.09067460408959253,0.10127654923985978,0.12390332119911039,0.2054762332976927,0.28916749217007004	0.250455	0.299438	0.30988	0.289625	-0.257705	7	chr15_55827478_55827530_-@UTR3,chr15_55827696_55827748_-@UTR3,chr15_55828422_55828474_-@UTR3,chr15_55829116_55829168_-@UTR3,chr15_55829484_55829536_-@UTR3,chr15_55829726_55829778_-@UTR3,chr15_55924674_55924726_-@UTR3	-0.02827788269935691,-0.005118119457605375,0.002415617811964532,0.009439297526883966,0.009215994920053927,-0.04121487771330282,0.04882524655811507	chr15_55924674_55924726_-@UTR3	0.0488252	0.00399692	0.0325136	NA
AL162431.1	0.07543205134588528,0.07374370801888247,0.07909633755130202,0.14248693591485345,0.07207628856691016,0.1609559602813876,0.19989576590866523,0.19631295241211377	0.0924864854902714,0.06772090458648893,0.09247215106202487,0.1516608375121425,0.09784443610245387,0.16789942749586914,0.18306051036384552,0.1468552473869038	0.365174	0.353634	0.187574	0.207558	0.0463265	8	chr1_180973242_180973294_-@UTR3,chr1_180974636_180974688_-@UTR3,chr1_180975086_180975138_-@UTR3,chr1_180975316_180975368_-@UTR3,chr1_180975640_180975692_-@UTR3,chr1_180975822_180975874_-@UTR3,chr1_180975956_180976008_-@UTR3,chr1_180976106_180976158_-@UTR3	0.01694153061458345,-0.006078835315724729,0.013273011661827469,0.0090873647765507,0.02563634848488347,0.006863835468522872,-0.016858344803307834,-0.04940669991114227	chr1_180976106_180976158_-@UTR3	-0.0494067	0.00720768	0.0454003	NA
CSTF1	0.5651382197366073,0.2238944304113011,0.042141798412326924,0.04851824801809872,0.06789709984693561,0.052410203574730294	0.5237430794582602,0.17090396606969538,0.07325536652377834,0.070205518288844,0.09557937809562018,0.06631269156380194	0.593504	0.555151	0.18142	0.204975	0.0963777	6	chr20_56399272_56399324_+@UTR3,chr20_56403854_56403906_+@UTR3,chr20_56404228_56404280_+@UTR3,chr20_56404436_56404488_+@UTR3,chr20_56405980_56406032_+@UTR3,chr20_56406268_56406320_+@UTR3	-0.041447086841634895,-0.05317144021113415,0.03050292499359932,0.02113544177628348,0.02707328344822367,0.013384925293103207	chr20_56403854_56403906_+@UTR3	-0.0531714	0.00242849	0.0249268	NA
SKI	0.13069296213259118,0.3082492047505949,0.22510468624217936,0.11843651468207116,0.15321698898802594,0.06429964320453742	0.15821716331405206,0.25838217606622643,0.2521034014159197,0.1163209745604661,0.15012482908305375,0.06485145556028203	0.411259	0.412771	0.226382	0.224391	-0.00529313	6	chr1_2307664_2307716_+@UTR3,chr1_2307868_2307920_+@UTR3,chr1_2308026_2308078_+@UTR3,chr1_2308386_2308438_+@UTR3,chr1_2309430_2309482_+@UTR3,chr1_2309928_2309980_+@UTR3	0.027246428639155357,-0.049990391312735416,0.026739971987284367,-0.0023565684875765103,-0.003317094327457082,0.00029228398075277495	chr1_2307868_2307920_+@UTR3	-0.0499904	0.00171865	0.0212937	NA
ZBTB5	0.1140718593956004,0.37770978022776575,0.25033843055425786,0.2578799298223759	0.19898345989043062,0.3314596077384364,0.22298255946351306,0.24657437290761983	0.501296	0.456869	0.258009	0.321238	0.133883	4	chr9_37438160_37438212_-@UTR3,chr9_37439686_37439738_-@UTR3,chr9_37439842_37439894_-@UTR3,chr9_37440202_37440254_-@UTR3	0.08430553118570565,-0.04626944376565312,-0.027482689937411736,-0.011486446925962929	chr9_37438160_37438212_-@UTR3	0.0843055	0.00170437	0.0211892	NA
DARS2	0.020352856589790393,0.018997843039654887,0.5677230241690172,0.3929262762015375	0.06340590061520293,0.11115936232215301,0.5772914563612238,0.2481432807014202	0.0620356	0.124266	0.598125	0.557568	-1.00226	4	chr1_173851888_173851940_+@UTR3,chr1_173856768_173856820_+@UTR3,chr1_173857856_173857908_+@UTR3,chr1_173858206_173858258_+@UTR3	0.040252370810085536,0.08898290087077496,0.008435455700321559,-0.1452394708758875	chr1_173858206_173858258_+@UTR3	-0.145239	3.51e-06	0.00100385	NA
CD109	0.23631821170282707,0.16452905697052853,0.16169034483415753,0.11033473401366378,0.07166490390570658,0.14952519795329158,0.10593755061982486	0.20155736683949121,0.16318633734860555,0.19045104775942276,0.12132990106272372,0.09898179720193827,0.15182719970659622,0.07266635008122234	0.361556	0.356482	0.266892	0.271102	0.0203878	7	chr6_73823638_73823690_+@UTR3,chr6_73824848_73824900_+@UTR3,chr6_73825020_73825072_+@UTR3,chr6_73826572_73826624_+@UTR3,chr6_73827482_73827534_+@UTR3,chr6_73827834_73827886_+@UTR3,chr6_73828166_73828218_+@UTR3	-0.03673916972949215,-0.003566036155099539,0.02647418033123447,0.008592821326332434,0.024777951091735667,1.9595556924018043e-05,-0.03556288377810557	chr6_73823638_73823690_+@UTR3	-0.0367392	0.00566903	0.0398541	NA
ZCCHC4	0.78998778998779,0.21001221001221002	0.5183006535947713,0.48169934640522877	0.81297	0.586596	0.329725	0.556099	0.470835	2	chr4_25365112_25365164_+@UTR3,chr4_25365392_25365444_+@UTR3	-0.2602860907208733,0.2510234330886504	chr4_25365112_25365164_+@UTR3	-0.260286	0.000254057	0.00860978	NA
RFX7	0.09665424181553213,0.2689085108439947,0.1786869044933561,0.1001990840700518,0.3555512587770653	0.1099860730486653,0.26791252859563236,0.1949990337994519,0.16241758016536667,0.2646847843908837	0.39583	0.373131	0.317536	0.338759	0.0851952	5	chr15_56090560_56090612_-@UTR3,chr15_56090696_56090748_-@UTR3,chr15_56091738_56091790_-@UTR3,chr15_56092524_56092576_-@UTR3,chr15_56092968_56093020_-@UTR3	0.012846504805340636,-0.0012788298802193232,0.015740756777789383,0.06138842765804968,-0.09062813192420982	chr15_56092968_56093020_-@UTR3	-0.0906281	0.00325035	0.0289062	NA
DGKH	0.14345329047748434,0.16161594449793773,0.1763856351193508,0.05553920845044701,0.07250460513022706,0.18470246251400113,0.07887979062349527,0.10654027502369634,0.02037878816336031	0.18634115165429121,0.10999927569659289,0.12146345503411647,0.06650381713832475,0.08987462426760756,0.18943769714262307,0.07590328649702531,0.08907091464678038,0.07140577792263846	0.337161	0.322764	0.163507	0.184802	0.0629593	9	chr13_42229140_42229192_+@UTR3,chr13_42229720_42229772_+@UTR3,chr13_42230186_42230238_+@UTR3,chr13_42230574_42230626_+@UTR3,chr13_42230956_42231008_+@UTR3,chr13_42232392_42232444_+@UTR3,chr13_42238682_42238734_+@UTR3,chr13_42240684_42240736_+@UTR3,chr13_42242820_42242872_+@UTR3	0.042789555370930654,-0.051271079581243065,-0.05458260981844196,0.01104830156142006,0.017432366796181223,0.0048132420298837575,-0.00281939150805742,-0.017267944025803908,0.050938377459790476	chr13_42230186_42230238_+@UTR3	-0.0545826	3.61e-06	0.00100385	NA
BTRC	0.22027260794414602,0.21179468193146678,0.12133192877935346,0.15038169072654903,0.1710286342303808,0.12519045638810386	0.20032489197487657,0.17276209508077386,0.17155888652462412,0.14928622924657725,0.20903153027036608,0.09703636690278206	0.382829	0.379706	0.25924	0.263629	0.0118198	6	chr10_101553450_101553502_+@UTR3,chr10_101553698_101553750_+@UTR3,chr10_101554190_101554242_+@UTR3,chr10_101554374_101554426_+@UTR3,chr10_101556104_101556156_+@UTR3,chr10_101557216_101557268_+@UTR3	-0.019174435759615582,-0.03815603206102072,0.05068097127742496,-0.00039513762108861483,0.038490967467552734,-0.027266961065656264	chr10_101554190_101554242_+@UTR3	0.050681	0.00473071	0.0356056	NA
AL450322.1	0.2152714932126697,0.3386752136752136,0.20722724987430868,0.23882604323780796	0.38341845041569284,0.3010531435613977,0.1733841150502665,0.142144290972643	0.248394	0.411359	0.452083	0.35411	-0.727764	4	chr10_3773718_3773770_+@UTR3-EX,chr10_3786206_3786258_+@UTR3-EX,chr10_3786396_3786448_+@UTR3-EX,chr10_3787036_3787088_+@UTR3-EX	0.16160115562380342,-0.04092744807899085,-0.03793787883315167,-0.09908959873620155	chr10_3773718_3773770_+@UTR3-EX	0.161601	0.000790784	0.0152843	NA
CCNF	0.2403919848263938,0.2838480804327288,0.2589697603103536,0.21679017443052384	0.24133428367903956,0.33471791424928293,0.2604715212576383,0.16347628081403923	0.429884	0.458467	0.386383	0.355608	-0.0928699	4	chr16_2457252_2457304_+@UTR3,chr16_2457674_2457726_+@UTR3,chr16_2458208_2458260_+@UTR3,chr16_2458814_2458866_+@UTR3	0.00012200960197414346,0.05002419141226572,0.0009848063632175719,-0.053709903913495755	chr16_2458814_2458866_+@UTR3	-0.0537099	0.0074341	0.046185	NA
LAMP3	0.36426767676767674,0.6357323232323232	0.489879414298019,0.5101205857019809	0.648163	0.527052	0.386425	0.507536	0.298412	2	chr3_183122652_183122704_-@UTR3,chr3_183124076_183124128_-@UTR3	0.11957886101721721,-0.12572679549196175	chr3_183124076_183124128_-@UTR3	-0.125727	0.00277987	0.0265112	NA
ATRN	0.15688283804225836,0.12234947017555713,0.16629318078593444,0.11293537380493901,0.12913602768675234,0.18196081964197908,0.13044228986257972	0.15167103408708119,0.13261659751355875,0.17395543348589604,0.15155081350630475,0.12824506465043367,0.17900794214351426,0.08295311461321142	0.316586	0.333572	0.313955	0.295639	-0.0754012	7	chr20_3647194_3647246_+@UTR3,chr20_3647484_3647536_+@UTR3,chr20_3648640_3648692_+@UTR3,chr20_3648964_3649016_+@UTR3,chr20_3649252_3649304_+@UTR3,chr20_3650372_3650424_+@UTR3,chr20_3650986_3651038_+@UTR3	-0.005319313599243897,0.010119274666493358,0.007519658566723847,0.038388393193859824,-0.0010107667636669315,-0.0030525151239667314,-0.047472924255727564	chr20_3650986_3651038_+@UTR3	-0.0474729	0.00274159	0.0264568	NA
IRF9	0.9364672364672364,0.06353276353276353	0.7911371932905134,0.20886280670948662	0.938078	0.797735	0.0950995	0.235442	0.233798	2	chr14_24166528_24166580_+@UTR3,chr14_24168016_24168068_+@UTR3-EX	-0.1434008500321169,0.13583128509346615	chr14_24166528_24166580_+@UTR3	-0.143401	0.00164125	0.0207968	NA
ACSS1	0.1687049509630155,0.8312950490369846	0.33709273182957394,0.6629072681704261	0.838279	0.677955	0.207421	0.367745	0.30624	2	chr20_25006220_25006272_-@UTR3,chr20_25007278_25007330_-@UTR3	0.175675335732807,-0.15589153024497848	chr20_25006220_25006272_-@UTR3	0.175675	0.00250934	0.0253835	NA
CTIF	0.3463765046418864,0.30903549954698956,0.1422864673420641,0.08194488568839942,0.12035664278066059	0.19969394425625478,0.38001850767049555,0.11353670546485663,0.10012501167341603,0.2066258309349769	0.493409	0.427674	0.225483	0.290585	0.206273	5	chr18_48860212_48860264_+@UTR3,chr18_48860602_48860654_+@UTR3,chr18_48861868_48861920_+@UTR3,chr18_48862618_48862670_+@UTR3,chr18_48863142_48863194_+@UTR3	-0.14443362039310584,0.07036404398419988,-0.027976416418553723,0.018279252616553776,0.08515043948613929	chr18_48860212_48860264_+@UTR3	-0.144434	0.00127222	0.0182957	NA
PRTG	0.18751807834999684,0.24843111362635975,0.10747028862478777,0.08449977991573915,0.13612525938502168,0.23595548009809467	0.1890399902705452,0.12419317390294866,0.16498833571041605,0.17726624431987792,0.13847888818866297,0.20603336760754917	0.30172	0.321608	0.343606	0.326523	-0.0920945	6	chr15_55611714_55611766_-@UTR3,chr15_55611948_55612000_-@UTR3,chr15_55613734_55613786_-@UTR3,chr15_55615694_55615746_-@UTR3,chr15_55618658_55618710_-@UTR3,chr15_55619776_55619828_-@UTR3	-0.005094324900662944,-0.1282305928432689,0.04964995273093864,0.08426308602364939,-0.004599382504312105,-0.03534765418568234	chr15_55611948_55612000_-@UTR3	-0.128231	0.00048935	0.011902	NA
MID1	0.04529497127295466,0.13513514142833966,0.12866792767102533,0.06199823397296834,0.07071453205328712,0.08726463213936347,0.13238610535673306,0.19798146163185967,0.14055699447346856	0.07303766063455987,0.14832866693331812,0.10785493033555049,0.05677954205085989,0.11436461126383607,0.08717970966032981,0.12238602238602242,0.14938017651195948,0.14068868022356396	0.325875	0.308393	0.236344	0.255154	0.0795485	9	chrX_10445560_10445612_-@UTR3,chrX_10446176_10446228_-@UTR3,chrX_10446558_10446610_-@UTR3,chrX_10447002_10447054_-@UTR3,chrX_10447490_10447542_-@UTR3,chrX_10448080_10448131_-@UTR3,chrX_10448362_10448414_-@UTR3,chrX_10448760_10448812_-@UTR3,chrX_10449176_10449228_-@UTR3	0.027862409224454057,0.013357980444009016,-0.02054630022393851,-0.0049821102897432065,0.04371697564145631,0.00011251495396379096,-0.009795794230441163,-0.048277279080589014,0.00032161197261398877	chrX_10448760_10448812_-@UTR3	-0.0482773	0.00123766	0.0179771	NA
SC5D	0.3079477578838345,0.2936582732855613,0.14242423889587505,0.09370655546462449,0.05456933050338107,0.05418399901528308,0.0535098449514406	0.282687385962826,0.268560954378066,0.14247258496296847,0.08524763212809605,0.0773935394666249,0.06792119332188105,0.07571670977953762	0.426058	0.409218	0.133274	0.161182	0.058182	7	chr11_121307808_121307860_+@UTR3,chr11_121307960_121308012_+@UTR3,chr11_121308158_121308210_+@UTR3,chr11_121308542_121308594_+@UTR3,chr11_121309014_121309066_+@UTR3,chr11_121309508_121309560_+@UTR3,chr11_121311196_121311248_+@UTR3	-0.025134013922587406,-0.0249764478779283,0.00011804091935008199,-0.008363551495573635,0.02284440363029041,0.013777657058762015,0.02222588300269964	chr11_121307808_121307860_+@UTR3	-0.025134	0.00579342	0.0403912	NA
MAP4K3	0.5335189621597388,0.10133792852239455,0.3651431093178666	0.4067940404017623,0.1693279289364177,0.42387803066181995	0.366165	0.42526	0.44999	0.408079	-0.215849	3	chr2_39249686_39249738_-@UTR3,chr2_39250136_39250188_-@UTR3,chr2_39325960_39326012_-@UTR3	-0.12647823708264982,0.06618912635076495,0.057369610499090895	chr2_39249686_39249738_-@UTR3	-0.126478	0.00033744	0.00980248	NA
TALDO1	0.8330519753604646,0.16694802463953531	0.8623027470520469,0.13769725294795307	0.834451	0.86345	0.174073	0.145074	-0.0492858	2	chr11_758960_759012_+@UTR3,chr11_764982_765034_+@UTR3	0.029217234172601914,-0.029046089482516524	chr11_758960_759012_+@UTR3	0.0292172	0.00342866	0.0299254	NA
STIM2	0.03782538576077676,0.307890926939528,0.3982960255950196,0.25598766170467563	0.07913343965975544,0.26346801346801346,0.3147262094630516,0.3426723374091796	0.0973296	0.129693	0.554021	0.534229	-0.414148	4	chr4_27019486_27019538_+@UTR3,chr4_27023456_27023508_+@UTR3,chr4_27023738_27023790_+@UTR3,chr4_27023928_27023980_+@UTR3	0.04035887387701903,-0.044464880793693096,-0.08302488384049966,0.08534207015695283	chr4_27023928_27023980_+@UTR3	0.0853421	0.00707071	0.0449943	NA
MOSPD1	0.24641645514510788,0.47323886739446513,0.280344677460427	0.30825174130104377,0.4742222020915743,0.21752605660738192	0.500221	0.450163	0.415467	0.470697	0.152117	3	chrX_134887930_134887982_-@UTR3,chrX_134888658_134888710_-@UTR3,chrX_134889092_134889144_-@UTR3	0.06107084847725763,0.0006562785783337244,-0.06299917808399527	chrX_134889092_134889144_-@UTR3	-0.0629992	0.002784	0.0265157	NA
SERINC1	0.016534678973671692,0.3733056670658801,0.6101596539604482	0.06056958962446767,0.37513184496924334,0.564298565406289	0.692486	0.650489	0.248647	0.284134	0.0902594	3	chr6_122443178_122443230_-@UTR3-EX,chr6_122443624_122443676_-@UTR3,chr6_122444766_122444818_-@UTR3	0.04371461635524866,0.0016638020531415387,-0.045895977302150004	chr6_122444766_122444818_-@UTR3	-0.045896	0.000242333	0.00840398	NA
ANKRD11	0.40336203634075973,0.41451689004880493,0.10426256862427076,0.07785850498616455	0.44593125262559613,0.33506107857431155,0.12947483958122258,0.0895328292188697	0.177995	0.193768	0.58645	0.571425	-0.122492	4	chr16_89284234_89284286_-@UTR3,chr16_89284696_89284748_-@UTR3,chr16_89286872_89286924_-@UTR3,chr16_89287616_89287668_-@UTR3	0.04229800465985717,-0.07932857403667326,0.024916111357385543,0.011427772927939922	chr16_89284696_89284748_-@UTR3	-0.0793286	0.00223044	0.0239592	NA
FAM76B	0.1108468286099865,0.053441295546558694,0.5384615384615384,0.2972503373819163	0.2541666666666667,0.09423076923076923,0.39946581196581193,0.25213675213675213	0.535086	0.446512	0.209311	0.334185	0.261074	4	chr11_95769222_95769274_-@UTR3,chr11_95770760_95770812_-@UTR3,chr11_95771106_95771158_-@UTR3,chr11_95771420_95771472_-@UTR3	0.1348835487731011,0.03329375007850714,-0.1408207410595756,-0.049683470589449386	chr11_95771106_95771158_-@UTR3	-0.140821	0.00146117	0.0196851	NA
LYST	0.4807476152109258,0.5192523847890743	0.6100298419053832,0.3899701580946168	0.548845	0.428068	0.512873	0.63365	0.35856	2	chr1_235661560_235661612_-@UTR3,chr1_235662322_235662374_-@UTR3	0.12585138055287726,-0.13051254211485047	chr1_235662322_235662374_-@UTR3	-0.130513	0.00170376	0.0211892	NA
MBP	0.21598515764595713,0.15033685968586705,0.10900428723489212,0.2617917621228463,0.26288193331043735	0.2682534727698426,0.16746945489790346,0.11034785766220594,0.23323347335870648,0.2206957413113415	0.405922	0.371168	0.346969	0.388095	0.12913	5	chr18_77013432_77013484_-@UTR3,chr18_77014896_77014948_-@UTR3,chr18_77015134_77015186_-@UTR3,chr18_77015308_77015360_-@UTR3,chr18_77016228_77016280_-@UTR3	0.05213275138758669,0.01708318003451481,0.0013401728841142546,-0.02848217697873312,-0.04207565826207271	chr18_77013432_77013484_-@UTR3	0.0521328	0.000473761	0.0116745	NA
HSPG2	0.38229973755012275,0.6177002624498772	0.43569293765372197,0.5643070623462781	0.637165	0.586688	0.414622	0.465099	0.119073	2	chr1_21822270_21822322_-@UTR3,chr1_21823194_21823246_-@UTR3	0.053650898348615306,-0.053036821179664906	chr1_21822270_21822322_-@UTR3	0.0536509	0.00198005	0.022596	NA
WDR33	0.09766183515257894,0.19641491293827973,0.2277959854704136,0.3783016489008344,0.09982561753789332	0.10618605266805699,0.25283851373815636,0.2527087560879267,0.32462315564351973,0.06364352186234017	0.353851	0.293765	0.301186	0.351964	0.26848	5	chr2_127702668_127702720_-@UTR3,chr2_127706032_127706084_-@UTR3,chr2_127706214_127706266_-@UTR3,chr2_127763098_127763150_-@UTR3,chr2_127763738_127763790_-@UTR3	0.007861178308148406,0.055723947672994434,0.02430340550708593,-0.05400257243516948,-0.036724881931137834	chr2_127706032_127706084_-@UTR3	0.0557239	0.000121965	0.00613888	NA
SRP14	0.16375180375180373,0.8362481962481962	0.21607413347589768,0.7839258665241023	0.852099	0.811334	0.328146	0.368911	0.0707254	2	chr15_40035856_40035908_-@UTR3,chr15_40036058_40036110_-@UTR3	0.05124088326741594,-0.05232216031105108	chr15_40036058_40036110_-@UTR3	-0.0523222	0.000670811	0.014175	NA
ZFP36L1	0.2808206880425009,0.13484335477703202,0.5843359571804672	0.3144725260907833,0.17684223093502613,0.5086852429741905	0.580919	0.539633	0.33819	0.382386	0.10636	3	chr14_68787766_68787818_-@UTR3,chr14_68788336_68788388_-@UTR3,chr14_68788736_68788788_-@UTR3	0.032541141325053036,0.04072098872882346,-0.07601865682431863	chr14_68788736_68788788_-@UTR3	-0.0760187	0.00254987	0.0254566	NA
FIGN	0.1029442010252245,0.16854893507345536,0.17552608490774804,0.1660001926526447,0.1790979690766471,0.2078826172642804	0.06025985663082437,0.1626538881097086,0.12626129811438366,0.0727924848059841,0.2354780271154745,0.3425544452236247	0.371857	0.43184	0.277507	0.210204	-0.215747	6	chr2_163602826_163602878_-@UTR3,chr2_163603836_163603888_-@UTR3,chr2_163605606_163605658_-@UTR3,chr2_163607330_163607382_-@UTR3,chr2_163608782_163608834_-@UTR3,chr2_163609096_163609148_-@UTR3	-0.044730548735555,-0.008963238124689965,-0.051094314298319315,-0.0944458649402329,0.05319779534422836,0.13020572923576676	chr2_163609096_163609148_-@UTR3	0.130206	0.00486775	0.0361861	NA
VAPB	0.19130334353804712,0.29626590416419213,0.19820318873766424,0.1299315333725333,0.1439515553948143,0.040344474792749024	0.16631023297689965,0.3185810074698963,0.17069103735770405,0.12940475162697387,0.1507989952434397,0.06421397532508644	0.421729	0.405523	0.273882	0.292348	0.056532	6	chr20_58440926_58440978_+@UTR3,chr20_58444146_58444198_+@UTR3,chr20_58444306_58444358_+@UTR3,chr20_58444846_58444898_+@UTR3,chr20_58445456_58445508_+@UTR3,chr20_58449602_58449654_+@UTR3	-0.02502022437222412,0.022220226712464264,-0.027534427138473844,-0.0005985835340923673,0.0067703327797730695,0.023752889152858385	chr20_58444306_58444358_+@UTR3	-0.0275344	0.000565909	0.012796	NA
C1GALT1	0.44311126259311,0.2456921137723319,0.1736315658563315,0.08012789943091393,0.0574371583473127	0.4221680930436691,0.3172759856630824,0.10400409626216077,0.07193475239558188,0.0846170726355058	0.529326	0.533805	0.17474	0.170209	-0.0121545	5	chr7_7243852_7243904_+@UTR3,chr7_7244324_7244376_+@UTR3,chr7_7245988_7246040_+@UTR3,chr7_7247632_7247684_+@UTR3,chr7_7248180_7248232_+@UTR3	-0.020925249809299717,0.071061643080504,-0.06933832432755167,-0.008256105025978261,0.026874708130115985	chr7_7244324_7244376_+@UTR3	0.0710616	0.00147345	0.0197623	NA
KAT7	0.23140416382957998,0.33119035009773423,0.3081889571437966,0.08141157280833919,0.04780495612054994	0.21315053076618914,0.2601335464324788,0.3332365538771233,0.09804125293449135,0.09543811598971741	0.484532	0.456641	0.170298	0.214747	0.0855314	5	chr17_49827656_49827707_+@UTR3,chr17_49828274_49828326_+@UTR3,chr17_49828582_49828634_+@UTR3,chr17_49829060_49829112_+@UTR3,chr17_49832452_49832504_+@UTR3	-0.018869417547435235,-0.07141742433031872,0.02439631637094203,0.015776815500279637,0.04667758566564972	chr17_49828274_49828326_+@UTR3	-0.0714174	0.000821693	0.015526	NA
ST13	0.05403652257283628,0.11640421438870707,0.14524597568686268,0.16668522608886996,0.517628061262724	0.05414195922483948,0.11651264447281239,0.13741577592070411,0.14405527414321195,0.5478743462384321	0.52902	0.532973	0.182909	0.178317	-0.0107395	5	chr22_40824742_40824794_-@UTR3,chr22_40825304_40825356_-@UTR3,chr22_40825802_40825854_-@UTR3,chr22_40826230_40826282_-@UTR3,chr22_40826478_40826530_-@UTR3	0.00013537818901420556,0.00013543348518769982,-0.007795378927236446,-0.02258342349079992,0.030232963874519347	chr22_40826478_40826530_-@UTR3	0.030233	0.00161161	0.0206377	NA
PLEKHA8	0.1425136954231048,0.07931186476481797,0.09973207951703623,0.0858148932684303,0.10256106699134822,0.16265526122974797,0.06809463335686942,0.07002276263733889,0.1012624656003074,0.08803127721099893	0.1083589719983893,0.06813131261967352,0.09572923022274164,0.07331911750740339,0.1337640587593001,0.11557621696350406,0.06888943865911988,0.11102092924320868,0.11280965230646682,0.11240107172019254	0.276302	0.247419	0.259813	0.284228	0.159288	10	chr7_30079042_30079094_+@UTR3,chr7_30079922_30079974_+@UTR3,chr7_30080668_30080720_+@UTR3,chr7_30081350_30081402_+@UTR3,chr7_30081866_30081918_+@UTR3,chr7_30082212_30082264_+@UTR3,chr7_30083320_30083372_+@UTR3,chr7_30083544_30083596_+@UTR3,chr7_30084052_30084104_+@UTR3,chr7_30084392_30084444_+@UTR3	-0.03439270652706314,-0.011530343756684228,-0.0043565209497514745,-0.01283619524808037,0.030712473831659176,-0.0472687195618052,0.0003967988623971713,0.040462530905809105,0.011132745796157084,0.02390314909638719	chr7_30082212_30082264_+@UTR3	-0.0472687	0.000717485	0.0147652	NA
CENPS-CORT	0.8056626664043544,0.19041576496819465,0.00392156862745098	0.7488726551226551,0.1821824009324009,0.06894494394494394	0.710326	0.664106	0.0140737	0.0785144	0.0970685	3	chr1_10442394_10442446_+@UTR3,chr1_10442682_10442734_+@UTR3,chr1_10452838_10452890_+@UTR3-EX	-0.05619802426142606,-0.007618995340625989,0.06506305369698999	chr1_10452838_10452890_+@UTR3-EX	0.0650631	0.00136293	0.0190337	NA
PCYT1A	0.08652765708139527,0.13116798087219558,0.15950383102189866,0.1410936754304112,0.13677234921064566,0.13905254625837257,0.205881960125081	0.06081554894625087,0.1286671848803766,0.15993291056006026,0.12898262325743243,0.1479473270745111,0.16483773827549858,0.20881666700587026	0.36963	0.383062	0.231479	0.210842	-0.0514954	7	chr3_196234870_196234922_-@UTR3,chr3_196236142_196236194_-@UTR3,chr3_196237272_196237324_-@UTR3,chr3_196237526_196237578_-@UTR3,chr3_196237908_196237960_-@UTR3,chr3_196238096_196238148_-@UTR3,chr3_196238372_196238424_-@UTR3	-0.02567445033597785,-0.0024945663998575396,0.00043399455031828404,-0.01209056877173792,0.011165238281795303,0.025760252441712206,0.0029368634816950567	chr3_196238096_196238148_-@UTR3	0.0257603	0.00607841	0.04172	NA
ATAD2B	0.2360701027367694,0.22334167889723444,0.5405882183659961	0.3702686202686203,0.240954415954416,0.38877696377696375	0.57727	0.43409	0.332774	0.444815	0.411254	3	chr2_23749286_23749338_-@UTR3,chr2_23749714_23749766_-@UTR3,chr2_23751776_23751828_-@UTR3	0.13299068337008846,0.018475785360091007,-0.14901079387607247	chr2_23751776_23751828_-@UTR3	-0.149011	0.000188753	0.00735529	NA
C1orf50	0.31861239119303636,0.1892601126472094,0.22721454173067077,0.08954173067076293,0.1753712237583205	0.2434479113508785,0.16659376442856796,0.28284853344997696,0.20704539379358947,0.10006439697698719	0.431273	0.441768	0.266117	0.250397	-0.034689	5	chr1_42775544_42775596_+@UTR3,chr1_42775840_42775892_+@UTR3,chr1_42776458_42776510_+@UTR3,chr1_42776868_42776920_+@UTR3,chr1_42779014_42779066_+@UTR3	-0.07537383771694334,-0.02377519206743553,0.05344675627301748,0.11372109528490303,-0.07569923397327723	chr1_42776868_42776920_+@UTR3	0.113721	0.00782546	0.0474636	NA
DGKD	0.4583717048999094,0.34924456560194544,0.1923837294981451	0.387312925170068,0.404808362369338,0.20787871246059397	0.525397	0.467808	0.378379	0.424066	0.167491	3	chr2_233469974_233470026_+@UTR3,chr2_233471616_233471668_+@UTR3,chr2_233472006_233472058_+@UTR3	-0.07082494849386012,0.0550466518403433,0.015121237395638532	chr2_233469974_233470026_+@UTR3	-0.0708249	0.00849523	0.0499784	NA
FHL2	0.044655000507311506,0.04554882189503409,0.9097961775976544	0.06535361542433678,0.06649241062253793,0.8681539739531252	0.897609	0.862573	0.0905107	0.118513	0.0574396	3	chr2_105359652_105359704_-@UTR3,chr2_105359914_105359966_-@UTR3,chr2_105360954_105361006_-@UTR3	0.02068422622393533,0.02092707406474461,-0.04159913700445106	chr2_105360954_105361006_-@UTR3	-0.0415991	0.00122805	0.0179478	NA
GABPB1	0.2871234752302714,0.23232511824744836,0.3742531740104556,0.10629823251182476	0.23259082137763232,0.3251877254803255,0.41928957966272334,0.02293187347931873	0.184407	0.118649	0.513203	0.5551	0.636199	4	chr15_50277430_50277482_-@UTR3,chr15_50278346_50278398_-@UTR3,chr15_50278600_50278652_-@UTR3,chr15_50285972_50286024_-@UTR3	-0.051964359321274106,0.09354465295675482,0.04616841675508665,-0.0799620807788334	chr15_50278346_50278398_-@UTR3	0.0935447	0.00106061	0.017107	NA
SLC25A36	0.08685289987986163,0.1497340304591798,0.1459135656463435,0.1672567662222738,0.21314783144338711,0.16703706860807677,0.07005783774087732	0.0869356714979456,0.16141332572170355,0.11948571749299862,0.17095498478548027,0.17038691493990094,0.19556010161392712,0.09526328394804401	0.175656	0.172773	0.369582	0.370927	0.0238752	7	chr3_140966348_140966400_+@UTR3,chr3_140976848_140976900_+@UTR3,chr3_140977122_140977174_+@UTR3,chr3_140977694_140977746_+@UTR3,chr3_140978016_140978068_+@UTR3,chr3_140978198_140978250_+@UTR3,chr3_140979008_140979060_+@UTR3	-0.00012478167002613616,0.01147444505273884,-0.026577319913570333,0.0035017160031103334,-0.0428722918819304,0.028288166301117912,0.024954040075855277	chr3_140978016_140978068_+@UTR3	-0.0428723	0.000765347	0.0150332	NA
TOP2B	0.2676076454882795,0.7323923545117205	0.33075490538782787,0.6692450946121721	0.774871	0.728419	0.432973	0.479425	0.0891864	2	chr3_25598086_25598138_-@UTR3,chr3_25598248_25598300_-@UTR3	0.06251400785753525,-0.06286679480311963	chr3_25598248_25598300_-@UTR3	-0.0628668	0.00416204	0.0331864	NA
ARL8A	0.23209439486335168,0.26282807726642127,0.5050775278702271	0.24494949494949494,0.2018716577540107,0.5531788472964944	0.573171	0.575663	0.331639	0.328667	-0.00625812	3	chr1_202133512_202133564_-@UTR3,chr1_202134048_202134100_-@UTR3,chr1_202134242_202134294_-@UTR3	0.013064905638815794,-0.06042260150478515,0.04804372057900075	chr1_202134048_202134100_-@UTR3	-0.0604226	0.00610731	0.0417887	NA
WDR60	0.7545180023228802,0.24548199767711965	0.5839947089947091,0.416005291005291	0.782076	0.637989	0.351958	0.496044	0.293776	2	chr7_158945810_158945862_+@UTR3,chr7_158946114_158946166_+@UTR3	-0.16925533298882045,0.16159128782763266	chr7_158945810_158945862_+@UTR3	-0.169255	0.00796614	0.0479556	NA
FYCO1	0.23984441062066633,0.19539996617622188,0.21922881785895484,0.3455268053441569	0.12365508365508367,0.24067815067815068,0.3362825462825463,0.2993842193842194	0.427833	0.469907	0.341365	0.300503	-0.135327	4	chr3_45918248_45918300_-@UTR3,chr3_45918690_45918742_-@UTR3,chr3_45921042_45921094_-@UTR3,chr3_45921658_45921710_-@UTR3	-0.11970226869925532,0.03933276523892104,0.11063503647662065,-0.049596106496666126	chr3_45918248_45918300_-@UTR3	-0.119702	0.0048187	0.0360616	NA
ZNF644	0.30892139647524747,0.29863277748640776,0.3924458260383447	0.24919449989122375,0.2957369498925206,0.45506855021625564	0.51671	0.56332	0.448176	0.400219	-0.1246	3	chr1_90916060_90916112_-@UTR3,chr1_90916286_90916338_-@UTR3,chr1_90916480_90916532_-@UTR3	-0.05943584846781691,-0.002769775030019017,0.06246603072101542	chr1_90916480_90916532_-@UTR3	0.062466	0.00696864	0.0447875	NA
MTF1	0.13318080855530617,0.2716999843415627,0.05736787468610632,0.20458908200961543,0.3331622504074093	0.19433042214697252,0.3124350671708598,0.06623522824918637,0.2282995857273026,0.19869969670567877	0.417395	0.336092	0.306778	0.377997	0.312558	5	chr1_37809700_37809752_-@UTR3,chr1_37810386_37810438_-@UTR3,chr1_37811514_37811566_-@UTR3,chr1_37813752_37813804_-@UTR3,chr1_37814994_37815046_-@UTR3	0.05974197404890655,0.0397384244250783,0.007757269106898723,0.022594264228797845,-0.13407000288006626	chr1_37814994_37815046_-@UTR3	-0.13407	0.00120896	0.0179193	NA
RCN1	0.5420694510967973,0.3485995376659137,0.10933101123728892	0.5098419816290539,0.38793587919063205,0.10222213918031409	0.641029	0.626752	0.304462	0.317658	0.0324955	3	chr11_32104686_32104738_+@UTR3,chr11_32105182_32105234_+@UTR3,chr11_32105510_32105562_+@UTR3	-0.03216157485536553,0.0393284022229306,-0.007048432288974671	chr11_32105182_32105234_+@UTR3	0.0393284	0.000942354	0.0165781	NA
TAF5L	0.24572649572649574,0.26303418803418804,0.20363247863247866,0.28760683760683764	0.18160173160173163,0.2202020202020202,0.38593073593073585,0.21226551226551227	0.436285	0.47295	0.297248	0.23877	-0.116416	4	chr1_229593178_229593230_-@UTR3,chr1_229599624_229599676_-@UTR3,chr1_229600294_229600346_-@UTR3,chr1_229600740_229600792_-@UTR3	-0.0613856885630622,-0.04102963410229252,0.17852649137894222,-0.072765311924187	chr1_229600294_229600346_-@UTR3	0.178526	0.00237461	0.0246664	NA
SPRTN	0.027037505267593766,0.47691108301727775,0.18853350189633375,0.08767383059418458,0.15357353560893383,0.06627054361567636	0.11040113348663276,0.43052702482986077,0.21160569530578588,0.0878930620398114,0.06842821638445637,0.09114486795345271	0.36772	0.406653	0.311291	0.279395	-0.145192	6	chr1_231351930_231351982_+@UTR3,chr1_231352716_231352768_+@UTR3,chr1_231353676_231353728_+@UTR3,chr1_231353814_231353866_+@UTR3,chr1_231354684_231354736_+@UTR3,chr1_231354852_231354904_+@UTR3	0.08286140939121908,-0.0458996898780023,0.023054832953900067,0.000458979093598072,-0.08414341136661256,0.024868382169963912	chr1_231354684_231354736_+@UTR3	-0.0841434	2.78e-05	0.00298458	NA
STX17	0.17897333771317508,0.13640127562891788,0.12275464673838656,0.14096452328159645,0.09336796145739235,0.07111289042183351,0.09585146861569625,0.06320727601215405,0.06582354712436013,0.031543073006487635	0.11642638005953494,0.08712633719987095,0.15177452506118896,0.1147406430070116,0.1748872928354074,0.06180131808109925,0.08503568710051446,0.08228482500498502,0.05475837768913832,0.07116461396124905	0.33697	0.309367	0.185239	0.218185	0.123305	10	chr9_99968796_99968848_+@UTR3,chr9_99969296_99969348_+@UTR3,chr9_99969458_99969510_+@UTR3,chr9_99970036_99970088_+@UTR3,chr9_99970642_99970694_+@UTR3,chr9_99971164_99971216_+@UTR3,chr9_99971492_99971543_+@UTR3,chr9_99972754_99972806_+@UTR3,chr9_99972950_99973002_+@UTR3,chr9_99973962_99974014_+@UTR3	-0.06162066331045504,-0.048395111432171636,0.029465621504098233,-0.025491250026738688,0.08163847401607519,-0.00859938282662169,-0.010122983037949146,0.019604949495337795,-0.010386190067710584,0.040064787324196806	chr9_99970642_99970694_+@UTR3	0.0816385	7.35e-05	0.00456015	NA
MYOZ3	0.29777777777777775,0.7022222222222222	0.5510900012178784,0.4489099987821215	0.452583	0.640208	0.75215	0.564525	-0.500359	2	chr5_150677438_150677490_+@UTR3,chr5_150677604_150677656_+@UTR3	0.17756410256410265,-0.2746438746438746	chr5_150677604_150677656_+@UTR3	-0.274644	0.0019508	0.0225091	NA
PARTICL	0.29365079365079366,0.7063492063492064	0.6916666666666668,0.30833333333333335	0.71692	0.334196	0.320078	0.702802	1.10112	2	chr2_85535602_85535654_-@UTR3-EX,chr2_85536928_85536980_-@UTR3-EX	0.38012820512820517,-0.36050569800569804	chr2_85535602_85535654_-@UTR3-EX	0.380128	0.00186807	0.022155	NA
ARPP19	0.09887395319796263,0.1000501131569658,0.12282776849786142,0.0938428945227148,0.07611135274234662,0.0758865479690989,0.11944551736957576,0.09660210580679146,0.08288891836825152,0.13347082836843102	0.10369778009104358,0.10547037202458948,0.12054708603059548,0.09211111572796533,0.07721324394931428,0.0627601550920407,0.10285030735384304,0.0929526181233626,0.10103571417131263,0.14136160743593282	0.269014	0.267936	0.250205	0.251486	0.00579048	10	chr15_52547340_52547392_-@UTR3,chr15_52547584_52547636_-@UTR3,chr15_52547830_52547882_-@UTR3,chr15_52549496_52549548_-@UTR3,chr15_52549696_52549748_-@UTR3,chr15_52550282_52550334_-@UTR3,chr15_52550436_52550488_-@UTR3,chr15_52550626_52550678_-@UTR3,chr15_52550830_52550882_-@UTR3,chr15_52551222_52551274_-@UTR3	0.0047460379591191815,0.005342021698014732,-0.0023545808583143035,-0.0018079212838289227,0.0010230180793529137,-0.013198517557000605,-0.016662516528161336,-0.003723962303236905,0.01806174266314746,0.007814259882630709	chr15_52550830_52550882_-@UTR3	0.0180617	0.00122868	0.0179478	NA
UPP1	0.9559108527131782,0.04408914728682171	0.8367521367521368,0.16324786324786325	0.952938	0.851227	0.174628	0.276339	0.162839	2	chr7_48108382_48108434_+@UTR3,chr7_48108706_48108758_+@UTR3	-0.11696649718233532,0.109914340597539	chr7_48108382_48108434_+@UTR3	-0.116966	0.000340815	0.00980248	NA
MRPL46	0.9167869167869167,0.08321308321308322	0.8236275801493192,0.17637241985068075	0.0910765	0.183433	0.917467	0.825111	-1.0101	2	chr15_88459480_88459532_-@UTR3,chr15_88465488_88465540_-@UTR3	-0.09112868571284949,0.09382532232631896	chr15_88465488_88465540_-@UTR3	0.0938253	0.000615698	0.0134011	NA
PRKAR2A	0.06337025200865119,0.10239559298519242,0.12162157312618814,0.09362250576872773,0.1539415804632566,0.1485355519512852,0.17819243224337197,0.13832051145332672	0.05533392636708737,0.08690246673844464,0.09981962261780412,0.07821424562376604,0.1953898318000654,0.16101852431857783,0.1651686675086568,0.1581527150255979	0.300006	0.314197	0.273799	0.263962	-0.0666746	8	chr3_48746712_48746764_-@UTR3,chr3_48746874_48746926_-@UTR3,chr3_48747016_48747068_-@UTR3,chr3_48747282_48747334_-@UTR3,chr3_48747738_48747790_-@UTR3,chr3_48749150_48749202_-@UTR3,chr3_48750572_48750624_-@UTR3,chr3_48751218_48751270_-@UTR3	-0.008620135332070518,-0.01604031126152014,-0.0223166638548723,-0.015955130406190107,0.04082909103459839,0.011920695395394837,-0.013528291325014402,0.019244332195411884	chr3_48747738_48747790_-@UTR3	0.0408291	0.00170133	0.0211892	NA
ZMAT3	0.03527359032209714,0.04734047324882074,0.09004169008464308,0.113256684681263,0.11091234313545371,0.11922813600648795,0.0646188196440942,0.09981818411095997,0.07389112097085172,0.14087997092394086,0.10473898687138772	0.08322011513827945,0.06274124608469742,0.10216789218141624,0.10988958679783346,0.08094570001268923,0.08673061382594348,0.08542624204417196,0.08506598411839741,0.08784890438313529,0.13480523665457847,0.08115847875885743	0.292883	0.271788	0.210364	0.234325	0.107844	11	chr3_179017542_179017594_-@UTR3,chr3_179017692_179017744_-@UTR3,chr3_179020086_179020138_-@UTR3,chr3_179020308_179020360_-@UTR3,chr3_179021264_179021316_-@UTR3,chr3_179021712_179021764_-@UTR3,chr3_179022804_179022856_-@UTR3,chr3_179023116_179023168_-@UTR3,chr3_179023394_179023446_-@UTR3,chr3_179024554_179024606_-@UTR3,chr3_179024954_179025006_-@UTR3	0.04732233861656281,0.014857813131388113,0.011613856025902883,-0.003831692035034917,-0.030372926453405766,-0.032886304691419,0.020256210198542596,-0.015202528255231149,0.013430410912255442,-0.006510878634097661,-0.023997133837856982	chr3_179017542_179017594_-@UTR3	0.0473223	0.000164901	0.00686896	NA
PBXIP1	0.14413989541324004,0.590639875869078,0.265220228717682	0.18146914906313402,0.46110036997255044,0.35743048096431557	0.520856	0.542921	0.418858	0.396722	-0.0598601	3	chr1_154944054_154944106_-@UTR3,chr1_154944418_154944470_-@UTR3,chr1_154944776_154944828_-@UTR3	0.03559341270986727,-0.12922486658598825,0.09002027236481996	chr1_154944418_154944470_-@UTR3	-0.129225	0.00347188	0.0299931	NA
TASOR2	0.44207459207459204,0.3979020979020979,0.16002331002331002	0.4991331607571188,0.2624662566002486,0.23840058264263267	0.598687	0.557847	0.251253	0.303425	0.101933	3	chr10_5763066_5763118_+@UTR3,chr10_5763296_5763348_+@UTR3,chr10_5764416_5764468_+@UTR3-EX	0.05437828875541989,-0.1362816141572677,0.07412860933547455	chr10_5763296_5763348_+@UTR3	-0.136282	0.00159423	0.0206244	NA
HOXB7	0.14910869820893757,0.39233165975183454,0.4585596420392279	0.21867548553404959,0.322262781840933,0.4590617326250174	0.60365	0.557265	0.189426	0.251574	0.11535	3	chr17_48607254_48607306_-@UTR3,chr17_48621316_48621368_-@UTR3,chr17_48622850_48622902_-@UTR3	0.0694731084674354,-0.06984080459456848,0.0005477614378969209	chr17_48621316_48621368_-@UTR3	-0.0698408	0.00625239	0.0421949	NA
ELL2	0.08902926283137665,0.05319618913277435,0.07457462701045729,0.20421070471142885,0.2195564868168325,0.15251257944537455,0.2069201500517558	0.09457225954729413,0.06519770632170681,0.08384934745057843,0.2564190686146336,0.2033065829736087,0.12306420225509196,0.17359083283708646	0.395689	0.3813	0.190415	0.210874	0.0534421	7	chr5_95885424_95885476_-@UTR3,chr5_95886266_95886318_-@UTR3,chr5_95887520_95887572_-@UTR3,chr5_95887910_95887962_-@UTR3,chr5_95888448_95888500_-@UTR3,chr5_95888556_95888607_-@UTR3,chr5_95888802_95888854_-@UTR3	0.0051037102126511025,0.011519989602828427,0.008820299406344934,0.0516997725586201,-0.01658762072676856,-0.029780651041488526,-0.033631017822957354	chr5_95887910_95887962_-@UTR3	0.0516998	0.00491433	0.036346	NA
ZBTB37	0.08566916699565731,0.04102513488616923,0.11187144507318214,0.038594259478586364,0.06715064847713881,0.052386278896346006,0.046822681346960854,0.09969513532482344,0.06224868769282507,0.03515082393882236,0.08397669283970115,0.08216724422804171,0.11373938091269319,0.07950241990905237	0.06530557618575474,0.05366323220975196,0.1009831494208674,0.08391830943790772,0.054133852083356915,0.060734154436204946,0.08110527182224771,0.058167736714256464,0.05130950451078782,0.05289038515429924,0.08435437110984609,0.10741600157836735,0.10376162883486084,0.042256826501491034	0.212093	0.22014	0.233888	0.225069	-0.0537248	14	chr1_173886388_173886440_+@UTR3,chr1_173887066_173887118_+@UTR3,chr1_173887416_173887468_+@UTR3,chr1_173889116_173889168_+@UTR3,chr1_173891250_173891302_+@UTR3,chr1_173891510_173891562_+@UTR3,chr1_173893432_173893484_+@UTR3,chr1_173894892_173894944_+@UTR3,chr1_173895410_173895462_+@UTR3,chr1_173896268_173896320_+@UTR3,chr1_173897442_173897494_+@UTR3,chr1_173902172_173902224_+@UTR3,chr1_173902888_…	-0.0199995228698083,0.012782972153401587,-0.010651212270097132,0.045306477878728005,-0.01271860830861974,0.008555950246327,0.03428389304634925,-0.04103086247234987,-0.010652916503554974,0.017882003685742234,0.0005934688295063939,0.025280192736671342,-0.009708320551719746,-0.03675256576910128	chr1_173889116_173889168_+@UTR3	0.0453065	0.00137666	0.019115	NA
CCNL1	0.03630804532443877,0.034900527523478345,0.10531773066901873,0.3729138997874361,0.45055979669562807	0.0696684321839613,0.08431978032550258,0.1027857441101427,0.31020989395419996,0.4330161494261935	0.574225	0.541201	0.202366	0.230201	0.0854522	5	chr3_157143428_157143480_-@UTR3-EX,chr3_157145500_157145552_-@UTR3-EX,chr3_157146486_157146538_-@UTR3,chr3_157148000_157148052_-@UTR3,chr3_157151590_157151642_-@UTR3	0.03310236784793567,0.049115748585206974,-0.0026120587928645383,-0.06249533311558936,-0.017516193662773072	chr3_157148000_157148052_-@UTR3	-0.0624953	0.000125474	0.00616394	NA
PPP4R3B	0.11571224778238352,0.38585208155343903,0.49843567066417743	0.1038983797241924,0.4511506776467786,0.444950942629029	0.633267	0.63291	0.214403	0.214853	0.000813244	3	chr2_55548418_55548470_-@UTR3,chr2_55549470_55549522_-@UTR3,chr2_55549714_55549766_-@UTR3	-0.011813524929731034,0.06491233791395429,-0.053234268485116254	chr2_55549470_55549522_-@UTR3	0.0649123	0.00795998	0.0479556	NA
NR2F2	0.450084033353588,0.2865887174206476,0.17664858442066464,0.08667866480509984	0.4285521847039436,0.2379172501614237,0.24474969610983624,0.08878086902479639	0.557011	0.528452	0.292788	0.315634	0.0759318	4	chr15_96337636_96337688_+@UTR3,chr15_96338134_96338186_+@UTR3,chr15_96338444_96338496_+@UTR3,chr15_96338592_96338644_+@UTR3	-0.021330199682657536,-0.04835287098179353,0.06809257840972982,0.0023245836101191686	chr15_96338444_96338496_+@UTR3	0.0680926	0.00210753	0.0234285	NA
TRIOBP	0.05959179240042084,0.2934822319646422,0.3495842366990158,0.21674031862383605,0.06508711333490654,0.015514306977178649	0.01594202898550725,0.24710144927536234,0.3231884057971015,0.2119565217391305,0.1394927536231884,0.06231884057971015	0.180537	0.128184	0.399442	0.425834	0.494071	6	chr22_37759886_37759938_+@UTR3,chr22_37773842_37773894_+@UTR3,chr22_37774124_37774176_+@UTR3,chr22_37774482_37774534_+@UTR3,chr22_37776214_37776266_+@UTR3,chr22_37776492_37776544_+@UTR3	-0.0448525990591654,-0.04719513826900973,-0.02725793019910666,-0.00597249718316753,0.07260999651560528,0.04509672543188274	chr22_37776214_37776266_+@UTR3	0.07261	0.000121544	0.00613888	NA
SPIRE1	0.11736221287618821,0.1100378469496277,0.12760705890414373,0.11513615861115589,0.18422433050121664,0.1789136284168493,0.16671876374081854	0.12861335823524975,0.13101971943207116,0.1279662978552671,0.13566165258804644,0.15262986412551346,0.17852753799113522,0.14558156977271683	0.357675	0.342383	0.296429	0.311942	0.0630392	7	chr18_12447724_12447776_-@UTR3,chr18_12448188_12448240_-@UTR3,chr18_12448360_12448412_-@UTR3,chr18_12448648_12448700_-@UTR3,chr18_12448834_12448886_-@UTR3,chr18_12449042_12449094_-@UTR3,chr18_12449480_12449532_-@UTR3	0.010791345794506385,0.020494085156075245,-7.831434103836021e-05,0.020052317272766976,-0.031957491524321674,-0.0008027039875446451,-0.02152155152515378	chr18_12448834_12448886_-@UTR3	-0.0319575	0.00345166	0.0299254	NA
YY1	0.24817319036316324,0.12296283124812625,0.0928462488611927,0.20525991449958192,0.05552461623229055,0.12132992525292324,0.0628138560291797,0.0910894175135425	0.2305727860900428,0.12512198157729829,0.08328930611569255,0.18316021302037247,0.0906677159483194,0.11360082070562806,0.057573924874849164,0.11601325166779741	0.360244	0.347621	0.210584	0.226235	0.0514626	8	chr14_100277646_100277698_+@UTR3,chr14_100277926_100277978_+@UTR3,chr14_100278090_100278142_+@UTR3,chr14_100278462_100278514_+@UTR3,chr14_100278976_100279028_+@UTR3,chr14_100279172_100279224_+@UTR3,chr14_100280344_100280396_+@UTR3,chr14_100280656_100280708_+@UTR3	-0.01764845020792949,0.0020775786945494146,-0.00962736408663234,-0.022145609396077265,0.03500893027088487,-0.007801261084556962,-0.005319805785255809,0.02480782197539791	chr14_100278976_100279028_+@UTR3	0.0350089	0.00043711	0.0112746	NA
VKORC1L1	0.1825499815727977,0.0902705158772789,0.1327957482897943,0.0657698003666552,0.07897565960923837,0.09489853102251976,0.1258102186608686,0.08785371691471137,0.08492560626457545,0.0561502214215604	0.15894563840188897,0.09017806337341412,0.1538461173842103,0.0713526755449036,0.08626600708284693,0.10052780444127811,0.12751433104437374,0.10822618480203844,0.06512657455138982,0.03801660337365601	0.312763	0.317664	0.223224	0.217316	-0.0224342	10	chr7_65954438_65954490_+@UTR3,chr7_65955018_65955070_+@UTR3,chr7_65955178_65955230_+@UTR3,chr7_65955586_65955638_+@UTR3,chr7_65955800_65955852_+@UTR3,chr7_65956124_65956176_+@UTR3,chr7_65956332_65956384_+@UTR3,chr7_65957128_65957180_+@UTR3,chr7_65957826_65957878_+@UTR3,chr7_65958458_65958510_+@UTR3	-0.0235310147333182,-4.38865467792815e-05,0.02107261788313297,0.005628609075273974,0.007333582613216205,0.005677532105494695,0.0017525365967797635,0.02039998546400519,-0.019724827203061374,-0.01805823982767603	chr7_65954438_65954490_+@UTR3	-0.023531	0.000388892	0.0105608	NA
RAB40C	0.6538667987943351,0.346133201205665	0.4989857592316609,0.5010142407683391	0.666872	0.51815	0.371377	0.520098	0.364039	2	chr16_627910_627962_+@UTR3,chr16_629190_629242_+@UTR3	-0.1535493127819928,0.15087010655022037	chr16_627910_627962_+@UTR3	-0.153549	0.00327972	0.0290816	NA
ZNF527	0.4412338034629057,0.25039559683522533,0.14680655888086228,0.16156404082100675	0.24685846560846558,0.2545745149911816,0.26884920634920634,0.22971781305114636	0.530253	0.404328	0.291772	0.409684	0.391153	4	chr19_37388776_37388827_+@UTR3,chr19_37389920_37389972_+@UTR3,chr19_37390746_37390798_+@UTR3,chr19_37391598_37391650_+@UTR3	-0.18462479549436067,0.008766354418528355,0.12410994802299144,0.0711548837635794	chr19_37388776_37388827_+@UTR3	-0.184625	0.00415573	0.0331864	NA
ZNF134	0.622895622895623,0.2612794612794613,0.11582491582491583	0.46517242081056603,0.28497766517089457,0.24984991401853943	0.676356	0.54656	0.235264	0.362098	0.307402	3	chr19_57621772_57621824_+@UTR3,chr19_57623318_57623370_+@UTR3,chr19_57624694_57624746_+@UTR3	-0.15958447427591888,0.014034985195574223,0.1199895923773904	chr19_57621772_57621824_+@UTR3	-0.159584	0.00522704	0.0378099	NA
TRIM24	0.355992794492934,0.39509696696761104,0.15696711057736987,0.07499446005161088,0.016948667910474436	0.26619905901697016,0.4325958624520529,0.16849182058187967,0.05694269471469588,0.0757705632344012	0.526865	0.491272	0.145005	0.196475	0.100913	5	chr7_138585030_138585082_+@UTR3,chr7_138585292_138585344_+@UTR3,chr7_138585562_138585614_+@UTR3,chr7_138585812_138585864_+@UTR3,chr7_138586996_138587048_+@UTR3	-0.08853162719818675,0.0377660519551129,0.012395171467776217,-0.01698129070100718,0.059448474219143954	chr7_138585030_138585082_+@UTR3	-0.0885316	0.000926808	0.0165781	NA
VPS13B	0.18473285642763498,0.21643683654940346,0.2550434776641407,0.205525574903494,0.13826125445532678	0.19563200365905453,0.19218530497566072,0.42114838885565553,0.11173319544285487,0.07930110706677437	0.360174	0.399836	0.375382	0.34345	-0.150712	5	chr8_99875630_99875682_+@UTR3,chr8_99876338_99876390_+@UTR3,chr8_99876720_99876772_+@UTR3,chr8_99877224_99877276_+@UTR3,chr8_99877396_99877448_+@UTR3	0.011600531660817287,-0.02328407723227527,0.1656852920556635,-0.09236803444447371,-0.05772585903935866	chr8_99876720_99876772_+@UTR3	0.165685	2.25e-05	0.00267804	NA
INPP4A	0.3068921007971395,0.16259954794743184,0.07537406468081032,0.14205859044768068,0.07780362675173519,0.23527206937520237	0.20105161850660783,0.1785971377823682,0.07495716063003216,0.15904817049156383,0.10864507614583903,0.27770083644358895	0.38102	0.323812	0.299794	0.350795	0.234713	6	chr2_98587634_98587686_+@UTR3,chr2_98588032_98588084_+@UTR3,chr2_98588680_98588732_+@UTR3,chr2_98588848_98588900_+@UTR3,chr2_98589414_98589466_+@UTR3,chr2_98589594_98589646_+@UTR3	-0.10456613066102088,0.016451846371662388,0.00027812482435042585,0.01749859701703882,0.03131389490725181,0.04271793252545267	chr2_98587634_98587686_+@UTR3	-0.104566	0.00588055	0.0409435	NA
CLIC4	0.1836964097352579,0.07745033341430863,0.09972736315522895,0.08177761119669905,0.08802246555146985,0.11055265708018548,0.12123344635858524,0.18264290613437126,0.054896807373893526	0.1678182062897666,0.08284401848341845,0.10949902060207102,0.08492866719419824,0.10121986865681143,0.10834119935160945,0.11642128703082266,0.16523244782022822,0.063695284571074	0.2973	0.296603	0.276412	0.277079	0.0033852	9	chr1_24840922_24840974_+@UTR3,chr1_24841404_24841456_+@UTR3,chr1_24841690_24841742_+@UTR3,chr1_24841936_24841988_+@UTR3,chr1_24842282_24842334_+@UTR3,chr1_24842712_24842764_+@UTR3,chr1_24842908_24842960_+@UTR3,chr1_24843082_24843134_+@UTR3,chr1_24843550_24843602_+@UTR3	-0.015890359644017166,0.005369190357459974,0.009745289556381653,0.0031277610593733185,0.013169209903055534,-0.002231723647448683,-0.0048313818706925415,-0.01742164879995431,0.008771761036659644	chr1_24843082_24843134_+@UTR3	-0.0174216	0.000426289	0.0110743	NA
POLR2G	0.20526737918042262,0.2777093864050386,0.5073613986657465,0.009661835748792272	0.18236552719311339,0.3425386873662736,0.38717221475842156,0.08792357068219137	0.379685	0.395881	0.371227	0.355115	-0.0602629	4	chr11_62762074_62762126_+@UTR3,chr11_62762660_62762712_+@UTR3,chr11_62766674_62766726_+@UTR3,chr11_62767212_62767264_+@UTR3-EX	-0.024273851148851167,0.06251644189144184,-0.1197082084582084,0.0752262321012321	chr11_62766674_62766726_+@UTR3	-0.119708	0.000919147	0.0165721	NA
GJC1	0.11089386883644807,0.07866972744062566,0.15371170806273565,0.11487915744700268,0.17139937185972387,0.115423088363744,0.11948063155084572,0.13554244643887448	0.1241879441633524,0.09881028350548739,0.1153566939340176,0.10585214982734366,0.2010465208008887,0.10688133704985521,0.1147544540601998,0.13311061665885526	0.303572	0.30281	0.248243	0.249074	0.00362385	8	chr17_44798620_44798672_-@UTR3,chr17_44798838_44798890_-@UTR3,chr17_44800010_44800062_-@UTR3,chr17_44800502_44800554_-@UTR3,chr17_44803472_44803524_-@UTR3,chr17_44803892_44803944_-@UTR3,chr17_44804372_44804424_-@UTR3,chr17_44804504_44804556_-@UTR3	0.013207056516052973,0.020041125067006338,-0.03835411552811184,-0.009076027208196641,0.029537673517247592,-0.008589935935037693,-0.0047824070323769785,-0.002489227100038599	chr17_44800010_44800062_-@UTR3	-0.0383541	0.00105226	0.0170899	NA
NFYB	0.17752571523757965,0.09341953663987561,0.7290547481225448	0.1868949382784381,0.15001354334093983,0.6630915183806222	0.626696	0.612488	0.227905	0.245946	0.0330852	3	chr12_104118668_104118720_-@UTR3,chr12_104119500_104119552_-@UTR3,chr12_104119680_104119732_-@UTR3	0.009408820887904346,0.05642905211508467,-0.06560175158909543	chr12_104119680_104119732_-@UTR3	-0.0656018	0.0013863	0.0192121	NA
PLEKHG2	0.8078791025473966,0.19212089745260344	0.7615446067463454,0.2384553932536546	0.817223	0.773507	0.236265	0.27998	0.0793153	2	chr19_39425486_39425538_+@UTR3,chr19_39426378_39426430_+@UTR3	-0.04627465734172187,0.04644014602894514	chr19_39426378_39426430_+@UTR3	0.0464401	0.00505817	0.0370693	NA
PYCR1	0.16458680638247203,0.835413193617528	0.1334242126731072,0.8665757873268928	0.850653	0.873577	0.357191	0.334267	-0.038363	2	chr17_81932366_81932418_-@UTR3,chr17_81932528_81932580_-@UTR3	-0.03079879592574533,0.03114409055412415	chr17_81932528_81932580_-@UTR3	0.0311441	0.00252504	0.0253835	NA
SCAMP1	0.18955409012525484,0.13714745900702432,0.19944264540165627,0.2149312563465514,0.06922896331967227,0.06465299873793977,0.1250425870619012	0.22392399875036198,0.149497176133795,0.20360680826914015,0.16626462248599091,0.08859858930052517,0.05841906440399126,0.10968974065619552	0.372368	0.38598	0.246233	0.229305	-0.0517965	7	chr5_78475666_78475718_+@UTR3,chr5_78475890_78475942_+@UTR3,chr5_78476276_78476328_+@UTR3,chr5_78476530_78476582_+@UTR3,chr5_78476948_78477000_+@UTR3,chr5_78477674_78477726_+@UTR3,chr5_78478244_78478296_+@UTR3	0.034237929603329,0.012267681082883508,0.004104322107247982,-0.048598461920695085,0.019269516471239714,-0.006272256046588674,-0.015368132574307136	chr5_78476530_78476582_+@UTR3	-0.0485985	0.000569778	0.01281	NA
B3GLCT	0.3334752934752934,0.1921348621348621,0.2688670488670489,0.03634998634998635,0.1236964236964237,0.045476385476385474	0.2756353039882827,0.16225830800536123,0.2283612060611105,0.06091915426098288,0.1736307827419647,0.09919524494229817	0.457029	0.409205	0.196003	0.257052	0.159463	6	chr13_31329952_31330004_+@UTR3,chr13_31330298_31330350_+@UTR3,chr13_31330502_31330554_+@UTR3,chr13_31330782_31330834_+@UTR3,chr13_31331450_31331502_+@UTR3,chr13_31332164_31332216_+@UTR3	-0.056472805724218755,-0.028639086587973678,-0.0392484458776082,0.025640964671668702,0.05068147752230584,0.05454780028669356	chr13_31329952_31330004_+@UTR3	-0.0564728	0.00190241	0.0221682	NA
ANAPC1	0.7591791199667912,0.2408208800332088	0.6249955489085924,0.3750044510914076	0.297192	0.420912	0.77513	0.65141	-0.502125	2	chr2_111768396_111768448_-@UTR3,chr2_111769034_111769086_-@UTR3	-0.131628768544642,0.13438794034365975	chr2_111769034_111769086_-@UTR3	0.134388	0.00188785	0.022155	NA
NAXD	0.36831647069546997,0.1745029436579888,0.45718058564654135	0.27664047422111937,0.25513509787703337,0.46822442790184726	0.418122	0.388415	0.503438	0.537329	0.106326	3	chr13_110638650_110638702_+@UTR3,chr13_110639040_110639092_+@UTR3,chr13_110639834_110639886_+@UTR3	-0.09008166095774495,0.08073350432344475,0.011511394368351857	chr13_110638650_110638702_+@UTR3	-0.0900817	0.00184481	0.0221377	NA
DCTN5	0.17135762837688923,0.3085915660414564,0.2585653222906589,0.10279841512877318,0.07286893977180019,0.04050449865253079,0.04531362973789113	0.1576359545326044,0.3203929870248557,0.2010095212714554,0.1128498751256652,0.06955626667119501,0.07036816097269737,0.0681872344015269	0.434546	0.413959	0.127446	0.156643	0.07002	7	chr16_23667672_23667724_+@UTR3,chr16_23667916_23667968_+@UTR3,chr16_23668400_23668452_+@UTR3,chr16_23669826_23669878_+@UTR3,chr16_23672218_23672270_+@UTR3,chr16_23673650_23673702_+@UTR3,chr16_23676340_23676392_+@UTR3	-0.013884274747685221,0.011621646301299138,-0.057619760558551586,0.009820906839641652,-0.0035221090795902604,0.02958257491677195,0.022608278277674684	chr16_23668400_23668452_+@UTR3	-0.0576198	0.000340211	0.00980248	NA
YWHAZ	0.06433359747009341,0.18496715776114392,0.11249374623241842,0.15670809165296237,0.4814974068833819	0.06021390135314337,0.15969497518395145,0.11307077728669956,0.18717027082476864,0.47985007535143703	0.485905	0.500329	0.231089	0.216949	-0.0422018	5	chr8_100918598_100918649_-@UTR3,chr8_100918686_100918738_-@UTR3,chr8_100919688_100919740_-@UTR3,chr8_100919950_100920002_-@UTR3,chr8_100920332_100920384_-@UTR3	-0.004146542406722881,-0.025290077903428243,0.00055194022385191,0.03042957615092079,-0.0016642971106385351	chr8_100919950_100920002_-@UTR3	0.0304296	0.00280635	0.0265945	NA
FOXD1	0.0251713608869989,0.9748286391130011	0.06470595402110474,0.9352940459788952	0.975139	0.936417	0.0450098	0.0837314	0.0584562	2	chr5_73444020_73444072_-@UTR3-EX,chr5_73446522_73446574_-@UTR3	0.03694594828756056,-0.0393976463885467	chr5_73446522_73446574_-@UTR3	-0.0393976	0.00344713	0.0299254	NA
PLEKHA5	0.18115601823501395,0.14466898006395865,0.6741750017010274	0.11784978775270039,0.1197060760167556,0.762444136230544	0.233348	0.170939	0.679305	0.76641	0.449001	3	chr12_19375772_19375824_+@UTR3,chr12_19376006_19376058_+@UTR3,chr12_19385022_19385073_+@UTR3-EX	-0.05982097508445225,-0.022207920488475447,0.08853345258608591	chr12_19385022_19385073_+@UTR3-EX	0.0885335	0.00273301	0.0264568	NA
B4GALT6	0.09179037909688063,0.3528369348802785,0.3699879526504913,0.18538473337234948	0.14432970680435184,0.34944157600344217,0.27953285389390864,0.22669586329829738	0.486407	0.466295	0.326186	0.350413	0.0609233	4	chr18_31624202_31624254_-@UTR3,chr18_31624786_31624838_-@UTR3,chr18_31625024_31625076_-@UTR3,chr18_31625286_31625338_-@UTR3	0.05028068535316295,-0.004840235942013826,-0.09147458321079155,0.039288027188959185	chr18_31625024_31625076_-@UTR3	-0.0914746	0.00526547	0.0380121	NA
ATXN3	0.06259881422924903,0.06379281949934125,0.08996486605182258,0.11051822573561704,0.09764492753623188,0.17320212999560824,0.03180720245937637,0.11106170399648661,0.259409310496267	0.033131386566501074,0.03799426471182196,0.11745627852498082,0.07938931297709924,0.11372834120925725,0.11267014015105618,0.061828022133365655,0.2265761945151258,0.21722605921079205	0.334651	0.357274	0.13359	0.0952998	-0.0943737	9	chr14_92041492_92041544_-@UTR3-EX,chr14_92041770_92041822_-@UTR3-EX,chr14_92060566_92060618_-@UTR3,chr14_92061156_92061208_-@UTR3,chr14_92061308_92061360_-@UTR3,chr14_92061580_92061632_-@UTR3,chr14_92062710_92062762_-@UTR3,chr14_92063556_92063608_-@UTR3,chr14_92064074_92064126_-@UTR3	-0.030174642902201447,-0.026541452464167975,0.026368601954827667,-0.0318093496869737,0.015007154721975474,-0.060879963921800215,0.028782866458935123,0.11364595679880482,-0.04254648143075143	chr14_92063556_92063608_-@UTR3	0.113646	5.77e-05	0.00418088	NA
RAD23A	0.8911878702082898,0.10881212979171011	0.9170606350409306,0.0829393649590694	0.896927	0.920726	0.177243	0.153444	-0.0377822	2	chr19_12952992_12953044_+@UTR3,chr19_12953612_12953664_+@UTR3	0.025806908281225227,-0.02576458591684952	chr19_12952992_12953044_+@UTR3	0.0258069	0.00479684	0.035954	NA
FBLN1	0.19051054011476176,0.3881652424376192,0.4213242174476191	0.09861170880401648,0.4790750702289164,0.4223132209670671	0.195214	0.10429	0.572685	0.63728	0.904453	3	chr22_45563288_45563340_+@UTR3,chr22_45600628_45600680_+@UTR3,chr22_45600978_45601030_+@UTR3	-0.09188009725716945,0.09045488589300471,0.000783331916675678	chr22_45563288_45563340_+@UTR3	-0.0918801	5.49e-05	0.00413741	NA
FAM138B	0.24126984126984127,0.36626984126984125,0.14226190476190476,0.2501984126984127	0.28845080047670235,0.48273203823620103,0.17228792159411954,0.05652923969297696	0.447994	0.55547	0.364412	0.238931	-0.310227	4	chr2_113584774_113584826_+@UTR3-EX,chr2_113585028_113585080_+@UTR3-EX,chr2_113585444_113585496_+@UTR3-EX,chr2_113586006_113586058_+@UTR3-EX	0.04396457288492267,0.1122314964430915,0.026762070987368713,-0.19209426157007004	chr2_113586006_113586058_+@UTR3-EX	-0.192094	0.00264655	0.0259921	NA
PHF19	0.22331945932793903,0.20263709639845315,0.17814753555213883,0.395895908721469	0.3022315334165062,0.22129031910087002,0.26073609789781743,0.2157420495848064	0.416911	0.245315	0.350606	0.453802	0.765107	4	chr9_120856608_120856660_-@UTR3,chr9_120857002_120857054_-@UTR3,chr9_120857646_120857698_-@UTR3,chr9_120869594_120869646_-@UTR3	0.07742233856052902,0.017553819272948135,0.08108608666846781,-0.17984023094805054	chr9_120869594_120869646_-@UTR3	-0.17984	8.7e-06	0.00156962	NA
F8	0.5612799729821006,0.4387200270178993	0.3927763778510047,0.6072236221489953	0.499239	0.647657	0.60719	0.458771	-0.375501	2	chrX_154836726_154836778_-@UTR3,chrX_154837132_154837184_-@UTR3	-0.16726283493641264,0.16402937467546913	chrX_154836726_154836778_-@UTR3	-0.167263	7.54e-05	0.00459402	NA
IFNAR1	0.2886908298673005,0.24635901498646598,0.05943751237868885,0.07340727536805967,0.10334059549745822,0.09720736779560309,0.07037697233775665,0.06118043176866706	0.3571278034411411,0.22810425572201473,0.07455049835860598,0.06901811433278345,0.06819948484448986,0.0633644358486096,0.08031839038578177,0.05931701706657352	0.377224	0.427867	0.258519	0.233831	-0.181741	8	chr21_33343554_33343606_+@UTR3,chr21_33355504_33355556_+@UTR3,chr21_33356012_33356064_+@UTR3,chr21_33356266_33356318_+@UTR3,chr21_33356524_33356576_+@UTR3,chr21_33358050_33358102_+@UTR3,chr21_33359112_33359164_+@UTR3,chr21_33359712_33359764_+@UTR3	0.06862417761819639,-0.017643289372701598,0.015711122486045517,-0.0037300247655673163,-0.03437524703190187,-0.033082254394469116,0.010539146955364162,-0.0012210257648127415	chr21_33343554_33343606_+@UTR3	0.0686242	0.000548092	0.0125318	NA
RAD1	0.07424092451943191,0.111928375190308,0.07012873553551481,0.18976409896446578,0.3028205206999021,0.2511173450903774	0.06364928514012698,0.13491004416506353,0.05672873709594386,0.18443147641368848,0.23668895241191823,0.32359150477325893	0.400047	0.438392	0.299983	0.276138	-0.132052	6	chr5_34906926_34906978_-@UTR3,chr5_34907248_34907300_-@UTR3,chr5_34907684_34907736_-@UTR3,chr5_34908526_34908578_-@UTR3,chr5_34908746_34908798_-@UTR3,chr5_34911618_34911670_-@UTR3	-0.0108261321578636,0.02262160174548697,-0.01361058765614933,-0.005581321559326252,-0.06612517902661613,0.07196719254017897	chr5_34911618_34911670_-@UTR3	0.0719672	0.00191136	0.0222368	NA
TRIO	0.12639757841116703,0.25140547395993335,0.29211887649950924,0.25180618578312647,0.0782718853462639	0.13598283091841434,0.2681585645850851,0.30661514582547794,0.23407477780539887,0.05516868086562379	0.399257	0.417161	0.344934	0.32608	-0.0632864	5	chr5_14508664_14508716_+@UTR3,chr5_14508988_14509040_+@UTR3,chr5_14509196_14509248_+@UTR3,chr5_14509664_14509716_+@UTR3,chr5_14509990_14510042_+@UTR3	0.009294900921848287,0.0164928673608169,0.014256039866019143,-0.01795499382803592,-0.023374874511084352	chr5_14509990_14510042_+@UTR3	-0.0233749	0.00120041	0.0179193	NA
GTPBP1	0.6713754996611345,0.3286245003388654	0.549038721601154,0.450961278398846	0.684258	0.567028	0.355816	0.473045	0.271119	2	chr22_38730980_38731032_+@UTR3,chr22_38732198_38732250_+@UTR3	-0.11964002619244574,0.12112799834574028	chr22_38732198_38732250_+@UTR3	0.121128	0.00741072	0.0461451	NA
CWF19L1	0.4708815958815959,0.5291184041184042	0.3806947139896713,0.6193052860103286	0.559049	0.643085	0.504783	0.420747	-0.202036	2	chr10_100232386_100232438_-@UTR3,chr10_100233120_100233172_-@UTR3	-0.09007553436119387,0.08853024936460774	chr10_100232386_100232438_-@UTR3	-0.0900755	0.00366052	0.0309585	NA
FAM135A	0.38343521344755166,0.24696153756016911,0.25161208822197395,0.1179911607703052	0.3067130134873897,0.28606274370765344,0.2995557675511212,0.10766847525383572	0.51115	0.515363	0.137146	0.130034	-0.0118416	4	chr6_70525070_70525122_+@UTR3,chr6_70526174_70526226_+@UTR3,chr6_70526488_70526540_+@UTR3,chr6_70559914_70559966_+@UTR3	-0.0763169202291511,0.03901580161861659,0.04784092519668026,-0.010177215624489741	chr6_70525070_70525122_+@UTR3	-0.0763169	0.00364566	0.030876	NA
ATAD3B	0.9209790568530133,0.0790209431469868	0.5964399801841507,0.40356001981584927	0.922504	0.605236	0.0994104	0.416678	0.608056	2	chr1_1496170_1496222_+@UTR3,chr1_1498464_1498516_+@UTR3-EX	-0.3181311756402502,0.3194192377495463	chr1_1498464_1498516_+@UTR3-EX	0.319419	5.03e-06	0.00110436	NA
AFDN	0.21932695369128422,0.14510037450265778,0.19415703313055768,0.25450547753887287,0.1267690649740095,0.06014109616261793	0.221918319369831,0.1265959634729276,0.19620003082785,0.2268592537622567,0.12318565257595215,0.10524077999118248	0.399852	0.385279	0.306723	0.320173	0.0535599	6	chr6_167970090_167970142_+@UTR3,chr6_167970678_167970730_+@UTR3,chr6_167970992_167971044_+@UTR3,chr6_167971124_167971176_+@UTR3,chr6_167971388_167971440_+@UTR3,chr6_167971850_167971902_+@UTR3	0.0023739317116570624,-0.018713266829852054,0.0018212613438128855,-0.027818833250778274,-0.003816131045309437,0.04477616650123096	chr6_167971850_167971902_+@UTR3	0.0447762	0.000327	0.00963455	NA
CIAO1	0.36567126227165864,0.18460688339706233,0.24880546281836724,0.14418124967406,0.0567351418388517	0.3110762277016987,0.17623476381313136,0.2872803031221093,0.14925419010664168,0.07615451525641906	0.476828	0.441739	0.275198	0.303409	0.110273	5	chr2_96271532_96271584_+@UTR3,chr2_96272506_96272558_+@UTR3,chr2_96273086_96273138_+@UTR3,chr2_96273846_96273898_+@UTR3,chr2_96274048_96274100_+@UTR3	-0.05443674122566883,-0.008346295697213485,0.038399571249565057,0.005080082439257588,0.019388721085528977	chr2_96271532_96271584_+@UTR3	-0.0544367	0.00233512	0.0245657	NA
CHST11	0.3445825278468195,0.20185031759182545,0.21190278928472797,0.13895332780999722,0.10271103746662985	0.2563150299992405,0.19329384066226168,0.15531632110579477,0.19248879775195563,0.20258601048074726	0.458274	0.384747	0.241873	0.325344	0.252301	5	chr12_104757800_104757852_+@UTR3,chr12_104758004_104758056_+@UTR3,chr12_104759702_104759754_+@UTR3,chr12_104760794_104760846_+@UTR3,chr12_104761896_104761948_+@UTR3	-0.08876779857005573,-0.010155177705116952,-0.05776965681007576,0.05118277322346551,0.09661819263924017	chr12_104761896_104761948_+@UTR3	0.0966182	0.00513253	0.03735	NA
ZKSCAN1	0.12264056835130656,0.06627232663992391,0.09462959532754102,0.0809814267053337,0.10115571776155718,0.11381444263715318,0.0503828595464535,0.10365325283490684,0.09263835908241055,0.09656719168157202,0.07726425943184166	0.11498160384097406,0.0672970200474919,0.11312005626945189,0.08231598056595826,0.1003735881985463,0.10697321483988659,0.058330542141307035,0.08542481146905702,0.11086522912932072,0.09001824129683679,0.07029971220116954	0.261223	0.264686	0.257085	0.253923	-0.0190015	11	chr7_100034164_100034216_+@UTR3,chr7_100035644_100035696_+@UTR3,chr7_100036102_100036154_+@UTR3,chr7_100037070_100037122_+@UTR3,chr7_100037416_100037468_+@UTR3,chr7_100037604_100037656_+@UTR3,chr7_100038150_100038202_+@UTR3,chr7_100039548_100039600_+@UTR3,chr7_100039696_100039748_+@UTR3,chr7_100041184_100041236_+@UTR3,chr7_100041378_100041430_+@UTR3	-0.007551095630930968,0.001125542039517119,0.018572378077939364,0.0014315235697959505,-0.0006801375386799868,-0.006734223339072434,0.008043000741997854,-0.018110656245132944,0.01830711661292965,-0.006443956234403483,-0.0068601826052910875	chr7_100036102_100036154_+@UTR3	0.0185724	0.00253933	0.0254214	NA
TRIP12	0.0861750149176188,0.12604207966114953,0.056407633380466504,0.11605415927516323,0.08288546814197356,0.5324356446236284	0.08708469047171348,0.12054391638442641,0.05903233459188963,0.1497634817668219,0.10513110079754978,0.47844447598759876	0.495558	0.480111	0.199096	0.211493	0.0456848	6	chr2_229763856_229763908_-@UTR3,chr2_229764212_229764264_-@UTR3,chr2_229764384_229764436_-@UTR3,chr2_229765484_229765536_-@UTR3,chr2_229766568_229766620_-@UTR3,chr2_229767372_229767424_-@UTR3	0.0008509129822209666,-0.005545680709764175,0.0025640188189373983,0.0336107518672004,0.022154918958465733,-0.053951824500435897	chr2_229767372_229767424_-@UTR3	-0.0539518	0.000268801	0.00868789	NA
ELP4	0.40350877192982454,0.5964912280701754	0.7095238095238096,0.2904761904761905	0.449791	0.730428	0.626769	0.346132	-0.699488	2	chr11_31783740_31783792_+@UTR3,chr11_31784338_31784390_+@UTR3	0.30467063800397126,-0.2773029439696107	chr11_31783740_31783792_+@UTR3	0.304671	0.00140675	0.0192993	NA
RBM39	0.15794828314320924,0.13418887248118624,0.1707488011020875,0.4902849460750562,0.04682909719846073	0.13181100465098325,0.10986088290672819,0.18562179527911402,0.5236286042718806,0.049077712891293944	0.369009	0.393145	0.292953	0.273927	-0.0914053	5	chr20_35703686_35703738_-@UTR3,chr20_35703990_35704042_-@UTR3,chr20_35704406_35704458_-@UTR3,chr20_35732068_35732120_-@UTR3,chr20_35734876_35734928_-@UTR3	-0.026072055575197983,-0.02426143201442127,0.014899012608849321,0.03333754590911814,0.0022960255134532315	chr20_35732068_35732120_-@UTR3	0.0333375	5.58e-05	0.00413741	NA
DPYSL4	0.8482443482443482,0.15175565175565178	0.7069061542745754,0.2930938457254247	0.854591	0.720253	0.1926	0.326937	0.24673	2	chr10_132205596_132205648_+@UTR3,chr10_132206618_132206670_+@UTR3-EX	-0.1329690759541623,0.14443934901995345	chr10_132206618_132206670_+@UTR3-EX	0.144439	0.00705077	0.044944	NA
INTS6	0.12508505035643833,0.05164655280964405,0.06411443801596296,0.1616007857769295,0.10456389049048649,0.2715178782476534,0.22147140430288534	0.1691239316239316,0.1017422748191979,0.06700361604207757,0.1427103879026956,0.1144723865877712,0.24861111111111112,0.156336291913215	0.360153	0.340884	0.133977	0.180235	0.079328	7	chr13_51365666_51365718_-@UTR3,chr13_51446566_51446618_-@UTR3,chr13_51448098_51448150_-@UTR3,chr13_51449458_51449510_-@UTR3,chr13_51450204_51450256_-@UTR3,chr13_51450702_51450754_-@UTR3,chr13_51450858_51450910_-@UTR3	0.044318436766624364,0.050381936362837235,0.0034239928646616485,-0.018289189566699837,0.01036147414915381,-0.022387313754713145,-0.06432112975926943	chr13_51450858_51450910_-@UTR3	-0.0643211	0.00125687	0.0181832	NA
DCBLD2	0.1454875984052306,0.07907190246211382,0.11852033903153908,0.12921182189140898,0.09586899588303982,0.05254741786235361,0.15149750199606246,0.11695144691774141,0.11084297555051013	0.15037285442457202,0.09152409743685012,0.10155654495504776,0.1281731505407216,0.08243147388154226,0.041525188168865024,0.1359449328109079,0.11040160752788052,0.15807015025361276	0.290389	0.29448	0.277543	0.272642	-0.020183	9	chr3_98796332_98796384_-@UTR3,chr3_98796810_98796862_-@UTR3,chr3_98797504_98797556_-@UTR3,chr3_98797898_98797950_-@UTR3,chr3_98798202_98798254_-@UTR3,chr3_98798346_98798398_-@UTR3,chr3_98798620_98798672_-@UTR3,chr3_98799072_98799124_-@UTR3,chr3_98799308_98799360_-@UTR3	0.004345773947470766,0.01186695924599862,-0.017492428784455075,-0.0015801884568770463,-0.01398143578634889,-0.011597799055080155,-0.0160593441675419,-0.007088223151385922,0.046616599972001946	chr3_98799308_98799360_-@UTR3	0.0466166	0.000526432	0.0121515	NA
SNTB2	0.22698687700996384,0.11668774456964139,0.13036968899434825,0.11123143044597325,0.08761101312603854,0.09923416207137169,0.08555561296565353,0.1423234708170097	0.23923415850194216,0.13477158096121514,0.1132789676528192,0.15400994680641011,0.08048167673656359,0.0953254904086017,0.08519198970576745,0.09770618922668066	0.329575	0.352228	0.25042	0.226093	-0.0959034	8	chr16_69300910_69300962_+@UTR3,chr16_69301134_69301186_+@UTR3,chr16_69302780_69302832_+@UTR3,chr16_69303450_69303502_+@UTR3,chr16_69305232_69305284_+@UTR3,chr16_69306062_69306114_+@UTR3,chr16_69307076_69307128_+@UTR3,chr16_69308184_69308236_+@UTR3	0.012307981346252606,0.01814434256891799,-0.01694247140441721,0.042777622959934744,-0.007002098356472253,-0.00378370391545621,-0.00025723511646201513,-0.04441118211685938	chr16_69308184_69308236_+@UTR3	-0.0444112	0.00147541	0.0197623	NA
TAF9B	0.04576062204287754,0.1419802248887945,0.1869880712187179,0.3240377921725485,0.21802414073838097,0.08320914893868064	0.05844710515266899,0.13382385114190068,0.15824960306544475,0.27731649719531754,0.26520677595839387,0.10695616748627418	0.374408	0.386816	0.308631	0.296657	-0.0470348	6	chrX_78129474_78129526_-@UTR3-EX,chrX_78129722_78129774_-@UTR3,chrX_78130308_78130360_-@UTR3,chrX_78130622_78130674_-@UTR3,chrX_78130960_78131012_-@UTR3,chrX_78131410_78131462_-@UTR3	0.012657806572013292,-0.008109705744538731,-0.028652238960700266,-0.04655152758313441,0.047014990905343085,0.023667131572722558	chrX_78130960_78131012_-@UTR3	0.047015	0.00257119	0.025582	NA
SRP68	0.16340043235041746,0.4531296793462449,0.3834698883033376	0.21601225062883064,0.39070316139969336,0.3932845879714761	0.551255	0.538342	0.4092	0.42127	0.0341953	3	chr17_76039076_76039128_-@UTR3,chr17_76039278_76039330_-@UTR3,chr17_76039568_76039620_-@UTR3	0.052463268804718216,-0.06228590638259357,0.009768743221780174	chr17_76039278_76039330_-@UTR3	-0.0622859	0.00802842	0.0480115	NA
AKTIP	0.31444219349706415,0.07388159249411365,0.2547776997619879,0.3568985142468342	0.31070927944079924,0.07178292172378511,0.3314634119631163,0.2860443868722993	0.439353	0.422447	0.391603	0.410252	0.0566092	4	chr16_53491018_53491070_-@UTR3,chr16_53491672_53491724_-@UTR3,chr16_53491828_53491880_-@UTR3,chr16_53492288_53492340_-@UTR3	-0.0037070262645113594,-0.002137590088574587,0.07616810528321982,-0.07048537185863252	chr16_53491828_53491880_-@UTR3	0.0761681	0.0024161	0.0248396	NA
METRN	0.7665494289388095,0.057913546630360795,0.1090764692534604,0.06646055517736935	0.6471542090567648,0.07779873466957085,0.17125921899815358,0.10378783727551073	0.610142	0.565455	0.125243	0.184048	0.109733	4	chr16_717084_717136_+@UTR3,chr16_717448_717500_+@UTR3,chr16_718136_718188_+@UTR3,chr16_719622_719674_+@UTR3	-0.11928174319658624,0.019227877862871376,0.061468364204854214,0.03664070166814007	chr16_717084_717136_+@UTR3	-0.119282	4.91e-05	0.00391451	NA
VHL	0.2362307376889328,0.2722149535117668,0.09991826754134166,0.19233268195822487,0.19930335929973386	0.22146160298069242,0.2641418710536157,0.078285590649324,0.18335798706898054,0.2527529482473874	0.413554	0.388555	0.302729	0.337293	0.0899572	5	chr3_10150330_10150382_+@UTR3,chr3_10150574_10150626_+@UTR3,chr3_10151492_10151544_+@UTR3,chr3_10151668_10151720_+@UTR3,chr3_10153434_10153486_+@UTR3-EX	-0.014595075514905381,-0.007920371603960807,-0.02141968343373904,-0.008807120447753364,0.05349561904210623	chr3_10153434_10153486_+@UTR3-EX	0.0534956	0.00415369	0.0331864	NA
B9D1	0.3035947135873038,0.27194288604260025,0.31887214832065053,0.10559025204944544	0.4134654138332689,0.1634041795049152,0.33676290487269545,0.08636750178912034	0.129867	0.109715	0.516414	0.528309	0.243277	4	chr17_19334982_19335034_-@UTR3,chr17_19335124_19335176_-@UTR3,chr17_19335346_19335398_-@UTR3,chr17_19343148_19343200_-@UTR3	0.10925950596216505,-0.10745986032279911,0.017980045612558282,-0.018766665613294126	chr17_19334982_19335034_-@UTR3	0.10926	0.00127769	0.0183018	NA
FAM13B	0.07864340701093601,0.15900375546524817,0.23523970000330394,0.5271131375205119	0.10696184906711222,0.12738095238095237,0.3346421609579504,0.431015037593985	0.577352	0.561483	0.206476	0.222636	0.0402098	4	chr5_137938274_137938326_-@UTR3,chr5_137938672_137938724_-@UTR3,chr5_137939806_137939858_-@UTR3,chr5_137940146_137940198_-@UTR3	0.028579948788247767,-0.030653911222020575,0.09882669448651285,-0.09450459013768936	chr5_137939806_137939858_-@UTR3	0.0988267	0.0031085	0.028163	NA
DESI2	0.18604213578440382,0.14260924827935137,0.2140968738906883,0.16394486368713168,0.18114475588702392,0.1121621224714008	0.18337879576830451,0.1565469887307302,0.20591595527112116,0.1403754193929531,0.16738976620153256,0.14639307463535836	0.376517	0.368859	0.275052	0.285175	0.0296453	6	chr1_244705778_244705830_+@UTR3,chr1_244705980_244706032_+@UTR3,chr1_244706196_244706248_+@UTR3,chr1_244707240_244707292_+@UTR3,chr1_244707880_244707932_+@UTR3,chr1_244708870_244708922_+@UTR3	-0.0025420175307206694,0.014044667383247084,-0.008052105061000292,-0.023414058552352318,-0.013615588792980804,0.034313956714870655	chr1_244708870_244708922_+@UTR3	0.034314	0.00135324	0.018935	NA
BORCS7	0.3930398538312207,0.17182254196642685,0.34971261086369,0.06131666095694872,0.024108332381713678	0.3773948488443466,0.14882696060787784,0.29615456917921906,0.12095580337227574,0.056667817996280845	0.517586	0.485238	0.237486	0.26668	0.0931065	5	chr10_102862966_102863018_+@UTR3,chr10_102863482_102863534_+@UTR3,chr10_102863952_102864004_+@UTR3,chr10_102864378_102864430_+@UTR3,chr10_102864682_102864734_+@UTR3	-0.01566725073215014,-0.022951655597624826,-0.0532510582678527,0.05910043489997148,0.032189997867279996	chr10_102864378_102864430_+@UTR3	0.0591004	0.00426452	0.0334592	NA
TFAP4	0.34912854030501084,0.6508714596949892	0.12031799899446959,0.8796820010055305	0.673077	0.885822	0.392521	0.179776	-0.396245	2	chr16_4257220_4257272_-@UTR3,chr16_4257932_4257984_-@UTR3	-0.22431931098597765,0.22131010464343792	chr16_4257220_4257272_-@UTR3	-0.224319	0.000606268	0.0133158	NA
BNIP3L	0.21780834091173262,0.14605048794791545,0.1039832737522398,0.12408909507057958,0.07884146548737732,0.1244319107501149,0.1473534336716378,0.05744199240840236	0.20614312811078309,0.16768345003969443,0.09987402368354749,0.1055241208992332,0.05591791573372885,0.11291043321591392,0.16202426113701943,0.08992266718007957	0.329085	0.317775	0.284753	0.291458	0.0504541	8	chr8_26408312_26408364_+@UTR3,chr8_26410764_26410816_+@UTR3,chr8_26410966_26411017_+@UTR3,chr8_26411616_26411668_+@UTR3,chr8_26411902_26411954_+@UTR3,chr8_26412294_26412346_+@UTR3,chr8_26412676_26412728_+@UTR3,chr8_26412894_26412946_+@UTR3	-0.011789488937068215,0.021407000981283675,-0.004285268286597893,-0.018702562473260256,-0.023060681992789454,-0.011673453436299094,0.014461632174067485,0.03221233873472292	chr8_26412894_26412946_+@UTR3	0.0322123	0.00702246	0.0448843	NA
PPFIBP1	0.3118347817339761,0.2362817952162527,0.1707425468794436,0.22018556888346996,0.0609553072868577	0.2823179521343434,0.2612413429723622,0.13012656731990258,0.26197681084377683,0.0643373267296148	0.457201	0.440799	0.247228	0.266728	0.0527082	5	chr12_27693054_27693106_+@UTR3,chr12_27693264_27693316_+@UTR3,chr12_27693580_27693632_+@UTR3,chr12_27694440_27694492_+@UTR3,chr12_27694898_27694950_+@UTR3	-0.02990567832668417,0.024390992635758446,-0.04106794187773333,0.04117455350819493,0.0027508105651118525	chr12_27694440_27694492_+@UTR3	0.0411746	0.00648672	0.0430268	NA
DIP2B	0.11205634757534527,0.06194569783938087,0.11185360985723959,0.11021153322540828,0.15773307802463,0.0764327869005581,0.11677857450353206,0.18112581778643483,0.07186255428747083	0.10440411215839938,0.07630498816381309,0.12306840134113865,0.1029360448032619,0.16940319353706146,0.0569180178477694,0.12258799106604001,0.13487780880568695,0.10949944227682917	0.268293	0.270988	0.290593	0.287795	-0.01442	9	chr12_50745076_50745128_+@UTR3,chr12_50745400_50745452_+@UTR3,chr12_50745868_50745920_+@UTR3,chr12_50746240_50746292_+@UTR3,chr12_50746510_50746562_+@UTR3,chr12_50746998_50747050_+@UTR3,chr12_50747674_50747726_+@UTR3,chr12_50748158_50748210_+@UTR3,chr12_50748428_50748480_+@UTR3	-0.007391459714169962,0.01459086801155357,0.011442821081890958,-0.007007064204999802,0.011877856215295385,-0.019210646376027846,0.006044246621523905,-0.04591535429312765,0.037816404674949594	chr12_50748158_50748210_+@UTR3	-0.0459154	2.95e-05	0.00300925	NA
ELOB	0.07788304624969256,0.9221169537503074	0.10536285453931736,0.8946371454606826	0.92536	0.900568	0.163716	0.188507	0.0391787	2	chr16_2771418_2771470_-@UTR3,chr16_2771920_2771972_-@UTR3	0.027659521469756268,-0.027432518241652937	chr16_2771418_2771470_-@UTR3	0.0276595	0.00128893	0.0184263	NA
STIMATE-MUSTN1	0.03342474942197132,0.20263108166800722,0.4646991925901522,0.29924497631986924	0.08540305010893245,0.15045907251789606,0.41464363523187053,0.349494242141301	0.563881	0.557562	0.180031	0.186999	0.0162588	4	chr3_52836776_52836828_-@UTR3,chr3_52837572_52837624_-@UTR3,chr3_52840022_52840074_-@UTR3,chr3_52840222_52840274_-@UTR3	0.05196612832257983,-0.05142691064203522,-0.0494235778096514,0.0501628806461385	chr3_52836776_52836828_-@UTR3	0.0519661	0.00116019	0.0177317	NA
NECTIN1	0.22539601321820701,0.3257712397398998,0.16104679671676791,0.2877859503251252	0.1498015873015873,0.27579365079365076,0.3458333333333334,0.22857142857142856	0.385216	0.456646	0.382036	0.29907	-0.245409	4	chr11_119661062_119661114_-@UTR3,chr11_119662096_119662148_-@UTR3,chr11_119664352_119664404_-@UTR3,chr11_119664490_119664542_-@UTR3	-0.07293861948343874,-0.04806602898177614,0.1830211980293002,-0.0567507408300198	chr11_119664352_119664404_-@UTR3	0.183021	0.000615683	0.0134011	NA
ATG12	0.05627809678242227,0.05086358569818319,0.04209181656270481,0.05970705297528104,0.06791143322468646,0.05183848589087566,0.1507531015728056,0.27197661968722714,0.2485798076058138	0.053515261395362085,0.08581052805044374,0.05673567802834239,0.05720158758037103,0.08008431039284034,0.057397944248831205,0.15341533291887485,0.2335742644214045,0.2222650929635298	0.405308	0.37646	0.162226	0.186435	0.106525	9	chr5_115828808_115828860_-@UTR3,chr5_115829038_115829090_-@UTR3,chr5_115829212_115829264_-@UTR3,chr5_115829384_115829436_-@UTR3,chr5_115829704_115829756_-@UTR3,chr5_115830420_115830472_-@UTR3,chr5_115831054_115831106_-@UTR3,chr5_115831676_115831728_-@UTR3,chr5_115831860_115831912_-@UTR3	-0.00288932929299672,0.034717622404509714,0.014473351350628494,-0.002620717516457184,0.011998633972352235,0.005422802238457362,0.0025432957833514958,-0.038395516927110934,-0.026347041122050524	chr5_115831676_115831728_-@UTR3	-0.0383955	0.00439508	0.0340899	NA
ZNF518A	0.40591002970500195,0.42707476366081715,0.048845295557417845,0.05033022603799709,0.06783968503876608	0.474025974025974,0.31648666513350776,0.05294858276816178,0.10035537466209032,0.056183403410266085	0.541715	0.549676	0.19923	0.190695	-0.0210484	5	chr10_96160904_96160956_+@UTR3,chr10_96161694_96161746_+@UTR3,chr10_96162176_96162228_+@UTR3,chr10_96162562_96162614_+@UTR3,chr10_96163614_96163666_+@UTR3	0.06782561050428182,-0.10976583036553023,0.004280412504309931,0.049888517984732775,-0.011385136855067507	chr10_96161694_96161746_+@UTR3	-0.109766	0.00192386	0.0223107	NA
FNIP2	0.17223594642072904,0.15986495388669303,0.13059947299077734,0.05156730346947739,0.20920893719806766,0.21892841458058845,0.05759497145366712	0.22641132446069967,0.18258032055654733,0.17004433897911497,0.06024525526963809,0.18668572783171994,0.14600163035853372,0.028031402543746347	0.361407	0.400068	0.283139	0.23724	-0.14662	7	chr4_158904818_158904870_+@UTR3,chr4_158905228_158905280_+@UTR3,chr4_158905686_158905737_+@UTR3,chr4_158906090_158906142_+@UTR3,chr4_158906274_158906326_+@UTR3,chr4_158906520_158906572_+@UTR3,chr4_158907560_158907612_+@UTR3	0.052515451422829734,0.0211660589390458,0.037756204519906966,0.0070870057648020485,-0.02360104069074287,-0.07366013132584506,-0.03078374192066182	chr4_158906520_158906572_+@UTR3	-0.0736601	0.00832635	0.0492636	NA
ABCA1	0.16572301967038808,0.29747474747474745,0.5368022328548644	0.09780578898225957,0.16651104886399004,0.7356831621537504	0.590203	0.756132	0.325043	0.193224	-0.357427	3	chr9_104781082_104781134_-@UTR3,chr9_104781536_104781588_-@UTR3,chr9_104783418_104783470_-@UTR3	-0.06277106447874724,-0.12438556229099978,0.19525575599367972	chr9_104783418_104783470_-@UTR3	0.195256	0.00421804	0.033449	NA
DIPK1B	0.29587542087542085,0.1543103448275862,0.5498142342969929	0.42754700513321203,0.14529430908741256,0.4271586857793755	0.368315	0.473491	0.572197	0.469415	-0.362399	3	chr9_136723966_136724018_+@UTR3,chr9_136724320_136724372_+@UTR3,chr9_136724634_136724686_+@UTR3	0.1287469360130254,-0.011018713218894138,-0.12250271164073184	chr9_136723966_136724018_+@UTR3	0.128747	0.000418846	0.0110005	NA
GRPEL2	0.11421551106162935,0.19840471908401666,0.1659531511310624,0.13770524221078748,0.12024769521303715,0.0864131014431384,0.17706057985632845	0.07354756326406652,0.19915982332799168,0.19244515332246082,0.1432832231390626,0.15226380180194898,0.09385689693449671,0.14544353820997266	0.337065	0.337443	0.297969	0.297487	-0.00161806	7	chr5_149351336_149351388_+@UTR3,chr5_149351532_149351584_+@UTR3,chr5_149352156_149352208_+@UTR3,chr5_149352552_149352604_+@UTR3,chr5_149352982_149353034_+@UTR3,chr5_149353322_149353374_+@UTR3,chr5_149354444_149354496_+@UTR3	-0.04041728006123342,0.0009010012109610666,0.02659097169878316,0.005724635813643769,0.032108780486676716,0.007595277444983645,-0.03139758586220187	chr5_149351336_149351388_+@UTR3	-0.0404173	6.41e-05	0.00426255	NA
HNRNPUL1	0.2607369010407768,0.23136774955732878,0.20612560200782154,0.1639785479541358,0.13779119943993698	0.23445107541859336,0.22996778179404778,0.21231854066573322,0.16591277880600636,0.15734982331561936	0.371675	0.351084	0.319208	0.335161	0.0822236	5	chr19_41301624_41301676_+@UTR3,chr19_41302766_41302818_+@UTR3,chr19_41306852_41306904_+@UTR3,chr19_41307004_41307056_+@UTR3,chr19_41307350_41307402_+@UTR3	-0.02631808185228207,-0.0014516627363254653,0.006137271156065854,0.0018786544995505194,0.01949107346046053	chr19_41301624_41301676_+@UTR3	-0.0263181	0.00202736	0.0228173	NA
KMT2D	0.11313917635042685,0.23661039486616176,0.2172922086681698,0.1653371490239155,0.26762107109132605	0.11136294557612404,0.23649520393858095,0.2633527372622704,0.16969596595206018,0.21909314727096443	0.372852	0.345488	0.348964	0.370731	0.109966	5	chr12_49019014_49019066_-@UTR3,chr12_49019210_49019262_-@UTR3,chr12_49019424_49019476_-@UTR3,chr12_49020392_49020444_-@UTR3,chr12_49020930_49020982_-@UTR3	-0.0017288946381276982,-6.93382727670333e-05,0.04595825743541024,0.004377328886730009,-0.048357628635502664	chr12_49020930_49020982_-@UTR3	-0.0483576	0.00357889	0.0305894	NA
RBBP9	0.06224135957885099,0.08766002899214159,0.12319771877622647,0.29750133516441596,0.19967078660257878,0.22972877088578625	0.07591808428672507,0.10759255280053177,0.16844575557425412,0.24059225759550487,0.22405231488268448,0.18339903486029974	0.428457	0.388284	0.230495	0.266836	0.142038	6	chr20_18486594_18486646_-@UTR3,chr20_18486836_18486888_-@UTR3,chr20_18486976_18487028_-@UTR3,chr20_18488660_18488712_-@UTR3,chr20_18488824_18488876_-@UTR3,chr20_18489400_18489452_-@UTR3	0.013778559300730978,0.01998767933881887,0.04520177044472498,-0.05657933317589006,0.02440703960081181,-0.04600348572413765	chr20_18488660_18488712_-@UTR3	-0.0565793	0.00114992	0.0177317	NA
SLC1A4	0.29413694430813847,0.2692547384811394,0.21008381482377061,0.10247250710825775,0.0733091124411773,0.05074288283751655	0.24943246222155427,0.24846516909755498,0.17385208634715468,0.14155148911475587,0.09239462845715314,0.09430416476182724	0.461473	0.419467	0.241126	0.278075	0.13769	6	chr2_65021420_65021472_+@UTR3,chr2_65022240_65022292_+@UTR3,chr2_65022494_65022546_+@UTR3,chr2_65022814_65022866_+@UTR3,chr2_65023468_65023520_+@UTR3,chr2_65023758_65023810_+@UTR3	-0.04408140129714777,-0.020263378543020016,-0.03562855998537401,0.03941135160755514,0.01953041902274691,0.043892547822932663	chr2_65021420_65021472_+@UTR3	-0.0440814	0.00539867	0.0386274	NA
SEPHS1	0.11386757936976277,0.12980841103111845,0.19371336401904085,0.0792163342381683,0.4833943113419095	0.16173541963015647,0.1489429538431353,0.1736716753050691,0.1321533875072895,0.38349656371434954	0.520285	0.461856	0.261419	0.310176	0.171861	5	chr10_13317458_13317510_-@UTR3,chr10_13317870_13317922_-@UTR3,chr10_13318054_13318106_-@UTR3,chr10_13318282_13318334_-@UTR3,chr10_13319030_13319082_-@UTR3	0.047723320802133345,0.019127585043766354,-0.019877968715799665,0.05275977619114884,-0.09928780867823228	chr10_13319030_13319082_-@UTR3	-0.0992878	0.00213393	0.0236133	NA
MYSM1	0.09386846053960811,0.08246945823681048,0.21049865182141025,0.08790401793493607,0.23051234105587293,0.20299043626551805,0.09175663414584417	0.11103192177740583,0.10016566796081897,0.20913563994668405,0.07676897347375275,0.25251868093333957,0.14501359053641452,0.10536552537158446	0.349203	0.335588	0.281031	0.295797	0.057377	7	chr1_58656890_58656942_-@UTR3,chr1_58657658_58657710_-@UTR3,chr1_58657862_58657914_-@UTR3,chr1_58658384_58658436_-@UTR3,chr1_58659122_58659174_-@UTR3,chr1_58659568_58659620_-@UTR3,chr1_58659896_58659948_-@UTR3	0.01714902099901927,0.017676395692162894,-0.001327816717574093,-0.011081735087954445,0.021954447302912877,-0.05779311936825768,0.013596198864101516	chr1_58659568_58659620_-@UTR3	-0.0577931	0.0038152	0.0317117	NA
CBFA2T2	0.19164037956109758,0.1606115678666165,0.13026700704337207,0.18437657125016887,0.10925376706977308,0.17175113996355587,0.05209956724541616	0.22503700962250192,0.11838967020314173,0.10680977054034049,0.14121638292622749,0.13162472242783124,0.1842092277325438,0.09271321654741346	0.365463	0.343866	0.225577	0.255944	0.0878775	7	chr20_33645234_33645286_+@UTR3,chr20_33645500_33645552_+@UTR3,chr20_33645770_33645822_+@UTR3,chr20_33646482_33646534_+@UTR3,chr20_33646884_33646935_+@UTR3,chr20_33649020_33649072_+@UTR3,chr20_33649952_33650004_+@UTR3	0.03350347326615516,-0.041715169792965676,-0.023018734102264668,-0.04264373894732104,0.02253967756530137,0.012701419028332883,0.04071778304958971	chr20_33646482_33646534_+@UTR3	-0.0426437	0.00103028	0.0169531	NA
MRTFB	0.2041764087317711,0.13221647453145646,0.2751206044952405,0.1367872941381589,0.19058126651871574,0.0611179515846573	0.20475576482960114,0.15787778371723324,0.23504942662560055,0.1078458364601435,0.22344360376521363,0.071027584602208	0.393872	0.383622	0.26971	0.280785	0.0380402	6	chr16_14261816_14261868_+@UTR3,chr16_14262784_14262836_+@UTR3,chr16_14262934_14262986_+@UTR3,chr16_14264612_14264664_+@UTR3,chr16_14265830_14265882_+@UTR3,chr16_14266696_14266748_+@UTR3	0.0005819166588861557,0.02559849064743558,-0.039988578768764466,-0.02888219540334845,0.03278839253267804,0.009887197946276599	chr16_14262934_14262986_+@UTR3	-0.0399886	0.00217568	0.0238567	NA
TM9SF3	0.18562564623371824,0.20736215336305006,0.09926182801451922,0.09046754523544294,0.41728282715326953	0.1883342687525197,0.17943223435040265,0.09293162969803738,0.08085928801749599,0.4584425791815443	0.461543	0.482021	0.312736	0.295675	-0.0626306	5	chr10_96520958_96521010_-@UTR3,chr10_96521286_96521338_-@UTR3,chr10_96521424_96521476_-@UTR3,chr10_96521632_96521684_-@UTR3,chr10_96522224_96522276_-@UTR3	0.002688868703089514,-0.02793127877196583,-0.006347570090842136,-0.009621022014551242,0.041119526418753105	chr10_96522224_96522276_-@UTR3	0.0411195	0.00280482	0.0265945	NA
ARGLU1	0.12217139661702847,0.31248821624188977,0.5653403871410818	0.1928929904753652,0.3226201049948369,0.48448690452979787	0.641134	0.573073	0.324587	0.381271	0.161907	3	chr13_106543404_106543456_-@UTR3,chr13_106543546_106543598_-@UTR3,chr13_106543964_106544016_-@UTR3	0.06965453964102081,0.009553056547583039,-0.0808541130850548	chr13_106543964_106544016_-@UTR3	-0.0808541	0.000232941	0.00823588	NA
RBM8A	0.0922350640103884,0.06399674683785912,0.09029952174576457,0.08315892005573344,0.1893648137730083,0.48094493357724616	0.14020805483707396,0.1109895551365378,0.13215750843580407,0.10016053318340708,0.15605172690547378,0.3604326215017033	0.518376	0.423359	0.201971	0.27235	0.292118	6	chr1_145922302_145922354_-@UTR3,chr1_145922664_145922716_-@UTR3,chr1_145922876_145922928_-@UTR3,chr1_145923626_145923678_-@UTR3,chr1_145924544_145924596_-@UTR3,chr1_145925706_145925758_-@UTR3	0.047041265721447414,0.04602711371769125,0.04093306062377204,0.016116795220096958,-0.034015798682005105,-0.12077445709846968	chr1_145925706_145925758_-@UTR3	-0.120774	2.14e-08	2.58e-05	NA
MFSD6	0.16254682327880954,0.3230942396020551,0.2934867987098258,0.22087213840930955	0.2197718941515052,0.1490140135344696,0.3809470580094323,0.250267034304593	0.368332	0.317233	0.417919	0.466271	0.215467	4	chr2_190500686_190500738_+@UTR3,chr2_190500946_190500998_+@UTR3,chr2_190501740_190501792_+@UTR3,chr2_190501884_190501936_+@UTR3	0.05549073948804728,-0.17295166229685247,0.08558667496013594,0.027981211369395076	chr2_190500946_190500998_+@UTR3	-0.172952	0.000148848	0.00653444	NA
POLR1E	0.42641544248101626,0.17435100418706975,0.14446384216876018,0.18175573060818961,0.07301398055496415	0.37381390798216313,0.19597632584136937,0.21410792575870494,0.14081452593152147,0.07528731448624114	0.497589	0.47261	0.268307	0.286616	0.0743036	5	chr9_37503658_37503710_+@UTR3,chr9_37505370_37505422_+@UTR3-EX,chr9_37506476_37506528_+@UTR3-EX,chr9_37506874_37506926_+@UTR3-EX,chr9_37507358_37507410_+@UTR3-EX	-0.05188771939391468,0.022316882256603665,0.07014222785886351,-0.040007955882142066,0.0031380994513540844	chr9_37506476_37506528_+@UTR3-EX	0.0701422	0.000441756	0.0113009	NA
TGIF1	0.7059062639161308,0.24365957903802613,0.05043415704584308	0.6193071135298277,0.2889907852542914,0.09170210121588103	0.698749	0.661713	0.102902	0.150349	0.0785687	3	chr18_3458322_3458374_+@UTR3,chr18_3458926_3458978_+@UTR3,chr18_3461900_3461952_+@UTR3-EX	-0.0863691313134688,0.044376700591929635,0.04016448286770282	chr18_3458322_3458374_+@UTR3	-0.0863691	0.00848249	0.049944	NA
MAGI3	0.114781712885622,0.13682123367221932,0.23232184621259125,0.18610289087235296,0.10087227339983772,0.1560884126453789,0.025102222646492606,0.04790940766550522	0.1011402027027027,0.10741835585585585,0.25730574324324323,0.08658502252252252,0.12856137387387387,0.10423704954954954,0.08116554054054054,0.1335867117117117	0.360828	0.309836	0.19714	0.253933	0.219808	8	chr1_113684302_113684354_+@UTR3,chr1_113684580_113684632_+@UTR3,chr1_113685330_113685382_+@UTR3,chr1_113685732_113685784_+@UTR3,chr1_113687400_113687452_+@UTR3-EX,chr1_113688688_113688740_+@UTR3-EX,chr1_113690218_113690270_+@UTR3-EX,chr1_113690372_113690423_+@UTR3-EX	-0.01628182291014771,-0.031677849873750566,0.02207815325742768,-0.1010308958308873,0.02430247940579762,-0.05396110133915699,0.05224938242704944,0.08174755178872833	chr1_113685732_113685784_+@UTR3	-0.101031	0.000803549	0.0153789	NA
SDHC	0.4758697894955241,0.114047907740197,0.16304652518826881,0.09381990088009995,0.08827054745630114,0.06494532923960913	0.401711873308297,0.13648253345307051,0.1616555004936159,0.11304556757491163,0.12089531693875644,0.06620920823134861	0.471158	0.441872	0.178364	0.208077	0.0925828	6	chr1_161363046_161363098_+@UTR3,chr1_161363744_161363796_+@UTR3,chr1_161364594_161364646_+@UTR3,chr1_161366090_161366142_+@UTR3,chr1_161368042_161368094_+@UTR3,chr1_161368280_161368332_+@UTR3	-0.07411949368158383,0.02203846131889864,-0.0016837087273189333,0.018835479437751476,0.03220065056003102,0.0009278288079825753	chr1_161363046_161363098_+@UTR3	-0.0741195	0.00316027	0.0284879	NA
POLDIP2	0.09656308174770241,0.07953092858019886,0.08185879825174112,0.23332947880446264,0.24645853383802552,0.2622591787778695	0.08303453547267863,0.05611683604796632,0.08841550630301392,0.25499903636000043,0.25634081410968224,0.26109327170665847	0.444407	0.458337	0.205698	0.190113	-0.0445286	6	chr17_28346612_28346664_-@UTR3,chr17_28346886_28346938_-@UTR3,chr17_28347156_28347208_-@UTR3,chr17_28347848_28347900_-@UTR3,chr17_28347980_28348032_-@UTR3,chr17_28348118_28348170_-@UTR3	-0.013502346295066747,-0.023379101364800224,0.0065636632592780825,0.02166109742192962,0.009884826761327098,-0.0011540273690281433	chr17_28346886_28346938_-@UTR3	-0.0233791	0.00158536	0.0206244	NA
LIPG	0.24900793650793654,0.30505952380952384,0.2524801587301587,0.19345238095238096	0.26916902132031856,0.36144098217049664,0.24529974905649196,0.12409024745269287	0.439603	0.483334	0.375117	0.330332	-0.136821	4	chr18_49591158_49591210_+@UTR3,chr18_49591594_49591646_+@UTR3,chr18_49592180_49592232_+@UTR3,chr18_49592674_49592726_+@UTR3	0.007523084030325311,0.04461171381588669,-0.020198440547205182,-0.08320653882082232	chr18_49592674_49592726_+@UTR3	-0.0832065	0.00189425	0.022155	NA
C11orf54	0.10971984970076572,0.06333483098750275,0.5120438827499897,0.3149014365617419	0.19258122194270774,0.07580077627020207,0.41173655382455476,0.3198814479625354	0.247682	0.301611	0.559063	0.511096	-0.284197	4	chr11_93761908_93761960_+@UTR3,chr11_93762278_93762330_+@UTR3,chr11_93762620_93762672_+@UTR3,chr11_93762816_93762868_+@UTR3	0.08288671011057963,0.01298026576010268,-0.09913944263462421,0.005279201072381168	chr11_93762620_93762672_+@UTR3	-0.0991394	0.0018534	0.022155	NA
SOAT1	0.5649495234910406,0.08329310939270058,0.09867913392800821,0.057256511223386736,0.08969835068881878,0.10612337127604511	0.48211538461538456,0.07011310761310761,0.16736733986733987,0.04993243243243242,0.10332689832689833,0.12714483714483713	0.487618	0.450618	0.184433	0.218724	0.113844	6	chr1_179353932_179353984_+@UTR3,chr1_179354450_179354502_+@UTR3,chr1_179355280_179355332_+@UTR3,chr1_179356056_179356108_+@UTR3,chr1_179357000_179357052_+@UTR3,chr1_179357170_179357222_+@UTR3	-0.08267285407950592,-0.013587439973518994,0.06788426332885412,-0.007775979688953175,0.01308971559246,0.02045001362307612	chr1_179353932_179353984_+@UTR3	-0.0826729	0.00130012	0.0185257	NA
ATP13A3	0.09781365715966213,0.05825038533971729,0.08278216458349635,0.19048864188426862,0.13599950410157013,0.13496591822238466,0.17645498413809027,0.12324474457081047	0.12698010882003496,0.05633449991863781,0.0774025087561284,0.20080976695720945,0.13753594853505427,0.11574820324492079,0.157765622193794,0.12742334157422033	0.338577	0.327303	0.240804	0.25226	0.0488542	8	chr3_194403272_194403324_-@UTR3,chr3_194403434_194403486_-@UTR3,chr3_194403600_194403652_-@UTR3,chr3_194404682_194404734_-@UTR3,chr3_194404878_194404930_-@UTR3,chr3_194405084_194405136_-@UTR3,chr3_194405438_194405490_-@UTR3,chr3_194405726_194405778_-@UTR3	0.02884466377911586,-0.0022228105462720887,-0.005677701336434526,0.010044389843227697,0.0012521258846003858,-0.01948561907845621,-0.018941334234059637,0.003887444546094257	chr3_194403272_194403324_-@UTR3	0.0288447	0.00713995	0.0451968	NA
UBE2V2	0.3245824709291775,0.40671841660304936,0.26869911246777306	0.29324294455495914,0.4028540477060525,0.30390300773898843	0.492974	0.466415	0.466879	0.492186	0.0798964	3	chr8_48060884_48060936_+@UTR3,chr8_48061148_48061200_+@UTR3,chr8_48061352_48061404_+@UTR3	-0.03127988947651533,-0.0038603743145737557,0.035144339419389325	chr8_48061352_48061404_+@UTR3	0.0351443	0.00646719	0.0430139	NA
AZI2	0.367786391042205,0.632213608957795	0.5285785785785785,0.4714214214214214	0.653445	0.502747	0.405617	0.556316	0.378234	2	chr3_28322952_28323004_-@UTR3,chr3_28323752_28323804_-@UTR3	0.15547267749305105,-0.15685715040553744	chr3_28323752_28323804_-@UTR3	-0.156857	0.0015808	0.0206073	NA
ZMAT2	0.4785433940041682,0.26295626030012803,0.19586977743247327,0.06263056826323052	0.40583074039676487,0.29491696624154895,0.21365226212187363,0.08560003123981257	0.573333	0.525425	0.297333	0.333429	0.125888	4	chr5_140706010_140706062_+@UTR3,chr5_140706386_140706438_+@UTR3,chr5_140706546_140706598_+@UTR3,chr5_140706630_140706681_+@UTR3	-0.07263034240969862,0.0318375342242897,0.017677803290371608,0.022839612810428525	chr5_140706010_140706062_+@UTR3	-0.0726303	0.00358881	0.030602	NA
ARL6IP6	0.8908382066276803,0.10916179337231968	0.780806056027774,0.21919394397222605	0.894786	0.789713	0.148341	0.253414	0.180214	2	chr2_152760020_152760072_+@UTR3,chr2_152761146_152761198_+@UTR3	-0.10885185352576654,0.10216507477377046	chr2_152760020_152760072_+@UTR3	-0.108852	0.00120705	0.0179193	NA
SF3B1	0.12342111949493428,0.12523203478866593,0.2011840461342704,0.2234096310054349,0.20222719611494697,0.12452597246174746	0.13678408410267553,0.12153547665468596,0.20068460486252335,0.20696830821693435,0.19803527385955141,0.1359922523036292	0.296901	0.299579	0.35873	0.356932	-0.0129544	6	chr2_197392078_197392130_-@UTR3,chr2_197392226_197392278_-@UTR3,chr2_197396082_197396134_-@UTR3,chr2_197398492_197398544_-@UTR3,chr2_197401442_197401494_-@UTR3,chr2_197409980_197410032_-@UTR3	0.013346048378158018,-0.0037074298856992344,-0.0005105132370439303,-0.016446344228654708,-0.00420220731797083,0.011449130608319452	chr2_197398492_197398544_-@UTR3	-0.0164463	0.00536517	0.0384637	NA
SLC7A6OS	0.19108100256698088,0.11947663791437295,0.2271692128359153,0.1241111961859786,0.1509715259473506,0.18719042454940168	0.136994218491179,0.169032743120889,0.20762002594576046,0.10241237945138655,0.1709143468262009,0.21302628616458405	0.356585	0.379565	0.326501	0.293712	-0.090099	6	chr16_68298144_68298196_-@UTR3,chr16_68299636_68299688_-@UTR3,chr16_68299834_68299886_-@UTR3,chr16_68300362_68300414_-@UTR3,chr16_68300626_68300678_-@UTR3,chr16_68300990_68301042_-@UTR3	-0.05347234466411194,0.04988066364250203,-0.01905684778752373,-0.021154356806770566,0.02033928665186005,0.026191841539005528	chr16_68298144_68298196_-@UTR3	-0.0534723	0.000749151	0.0149799	NA
NABP1	0.07743946295852314,0.25707264444977224,0.2153959881723008,0.12800687285223364,0.12906577159753854,0.08307360345240951,0.06281467274035003,0.04713098377687205	0.09092119968767702,0.23343080668126212,0.14874722081881017,0.1268109544392901,0.11892207745814004,0.11306568138633298,0.07634442624261507,0.0917576332858725	0.323729	0.305219	0.292379	0.305607	0.0849413	8	chr2_191683498_191683550_+@UTR3,chr2_191685792_191685844_+@UTR3,chr2_191686104_191686156_+@UTR3,chr2_191686432_191686484_+@UTR3,chr2_191686908_191686960_+@UTR3,chr2_191687106_191687158_+@UTR3,chr2_191688198_191688250_+@UTR3,chr2_191688498_191688550_+@UTR3	0.00839415661974137,-0.02763380371036009,-0.07063816809077669,-0.005901301535561537,-0.014865055157498294,0.024913154539019683,0.008384625057107423,0.03922625257029587	chr2_191686104_191686156_+@UTR3	-0.0706382	0.00404221	0.0327195	NA
VSIG10	0.18395004520012317,0.14881219529713072,0.12405121060850584,0.15989554426333166,0.12593398672245903,0.12906723229847175,0.12828978560997772	0.15071090622319636,0.15692457647069202,0.1613138752986179,0.14314596732535825,0.12117394055221793,0.13624580661308114,0.13048492751683619	0.295882	0.300707	0.343049	0.338558	-0.0233391	7	chr12_118064440_118064492_-@UTR3,chr12_118064750_118064802_-@UTR3,chr12_118064982_118065034_-@UTR3,chr12_118065456_118065508_-@UTR3,chr12_118065686_118065738_-@UTR3,chr12_118066004_118066056_-@UTR3,chr12_118066460_118066512_-@UTR3	-0.03288823731366036,0.008377415352174067,0.03746446001990816,-0.016428028114311544,-0.004447604943652803,0.007453264237257701,0.0024830558670085046	chr12_118064982_118065034_-@UTR3	0.0374645	0.00645757	0.0430139	NA
MED16	0.17429193899782133,0.8257080610021786	0.3860930735930736,0.6139069264069263	0.829021	0.621487	0.19073	0.398264	0.415683	2	chr19_865384_865436_-@UTR3-EX,chr19_867938_867990_-@UTR3	0.2137525541617613,-0.19737682512618582	chr19_865384_865436_-@UTR3-EX	0.213753	0.000393153	0.010586	NA
SNX30	0.1524066962174981,0.1677104064001179,0.18093186775400263,0.2320263333067253,0.13468029088715947,0.1322444054344966	0.19459172852598092,0.1882585130199128,0.12615765288087666,0.1677801343230824,0.17950394721338517,0.14370802403676214	0.316688	0.329369	0.336471	0.325902	-0.0566416	6	chr9_112868928_112868980_+@UTR3,chr9_112869924_112869976_+@UTR3,chr9_112872040_112872092_+@UTR3,chr9_112872962_112873014_+@UTR3,chr9_112874388_112874440_+@UTR3,chr9_112874522_112874574_+@UTR3	0.042144174607145174,0.02064517016071374,-0.053930026806322084,-0.06334934734618591,0.044821524772932775,0.011738040790789467	chr9_112872962_112873014_+@UTR3	-0.0633493	0.00334075	0.0293857	NA
FAM136A	0.06613934937482142,0.2363429200541863,0.22340925833516556,0.26662555189296816,0.20748292034285853	0.09590434803744519,0.25171005373360344,0.21323703580665834,0.24946238969872536,0.1896861727235677	0.424342	0.403114	0.338904	0.358508	0.0740384	5	chr2_70296016_70296068_-@UTR3,chr2_70296342_70296394_-@UTR3,chr2_70296594_70296646_-@UTR3,chr2_70296776_70296828_-@UTR3,chr2_70297248_70297300_-@UTR3	0.029878735488920352,0.015473044129591829,-0.010027240958268291,-0.017015894468809856,-0.017635403106554787	chr2_70296016_70296068_-@UTR3	0.0298787	0.00199013	0.0226444	NA
CKAP4	0.0807918471295177,0.40293082457464485,0.5162773282958374	0.07985564766318339,0.36435091012576687,0.5557934422110498	0.656651	0.66717	0.237543	0.225516	-0.0229291	3	chr12_106237990_106238042_-@UTR3,chr12_106238632_106238684_-@UTR3,chr12_106238942_106238994_-@UTR3	-0.0009641027843197841,-0.038552585262292105,0.03945760108815932	chr12_106238942_106238994_-@UTR3	0.0394576	0.000420194	0.0110005	NA
VPS13C	0.0999440316121824,0.3304568065314101,0.30716214972024003,0.07915260721554107,0.07766364662276813,0.0612985743640419,0.04432218393381626	0.05590383103022133,0.32721042579485454,0.25702248543502343,0.11606882051775885,0.08958222992601153,0.08758405957597061,0.06662814772015986	0.148521	0.194186	0.434284	0.385027	-0.386776	7	chr15_61853036_61853088_-@UTR3,chr15_61853524_61853576_-@UTR3,chr15_61854128_61854180_-@UTR3,chr15_61865098_61865150_-@UTR3,chr15_61866196_61866248_-@UTR3,chr15_61866754_61866806_-@UTR3,chr15_61867864_61867915_-@UTR3	-0.04441553444048905,-0.00364846963987725,-0.05037071831543061,0.0361446879102664,0.01127370245102298,0.025564594457514023,0.0215893757009371	chr15_61854128_61854180_-@UTR3	-0.0503707	0.0015547	0.0203769	NA
WDR26	0.08278821782322927,0.05511995754827507,0.06871990393050802,0.11659047177794901,0.17710349542294548,0.15418485404994753,0.3454930994471455	0.10071566704943795,0.06699903854029278,0.08941676352184741,0.12916364831254673,0.16127925621959516,0.13936574419835024,0.31305988215792974	0.41584	0.39219	0.15981	0.18716	0.0844758	7	chr1_224386024_224386076_-@UTR3,chr1_224386264_224386316_-@UTR3,chr1_224386966_224387018_-@UTR3,chr1_224388948_224389000_-@UTR3,chr1_224389224_224389276_-@UTR3,chr1_224389432_224389484_-@UTR3,chr1_224389690_224389742_-@UTR3	0.017863865526855427,0.011818090613464526,0.020630761302982303,0.01251533987001778,-0.01585801684507354,-0.014853925693129572,-0.0324470728770615	chr1_224389690_224389742_-@UTR3	-0.0324471	3.46e-05	0.00324138	NA
CD302	0.06220419202163624,0.06639621365787694,0.17194050033806627,0.231710615280595,0.11857110660356096,0.34917737209826466	0.12044964787434198,0.036680929359752264,0.2379564722231657,0.19179403080312055,0.10671995508398384,0.3063989646556356	0.450837	0.424902	0.191468	0.220567	0.0854763	6	chr2_159768608_159768660_-@UTR3,chr2_159768826_159768878_-@UTR3,chr2_159770624_159770676_-@UTR3,chr2_159771000_159771052_-@UTR3,chr2_159771316_159771368_-@UTR3,chr2_159771832_159771884_-@UTR3	0.058257088877085486,-0.028971137684425753,0.06589299225915038,-0.039146092480642436,-0.011343394778438709,-0.04210985567653941	chr2_159770624_159770676_-@UTR3	0.065893	0.00145056	0.0195785	NA
HUWE1	0.4341286495949516,0.5658713504050484	0.3949065936597906,0.6050934063402095	0.643421	0.673683	0.541772	0.51151	-0.066308	2	chrX_53533014_53533066_-@UTR3,chrX_53533208_53533260_-@UTR3	-0.03923811332504634,0.039084145500628886	chrX_53533014_53533066_-@UTR3	-0.0392381	0.0027396	0.0264568	NA
ARHGAP42	0.2716457811194653,0.037978279030910604,0.21328320802005007,0.10639933166248955,0.07488721804511277,0.17162907268170424,0.12417710944026733	0.32914584273425684,0.06838480072880217,0.19957344639983654,0.08215342874738549,0.0965748001328191,0.17573270442928948,0.04843497682761048	0.350925	0.388009	0.266237	0.215619	-0.144926	7	chr11_100988844_100988896_+@UTR3,chr11_100989202_100989254_+@UTR3,chr11_100989604_100989656_+@UTR3,chr11_100989878_100989930_+@UTR3,chr11_100990530_100990582_+@UTR3,chr11_100991686_100991738_+@UTR3,chr11_100992768_100992820_+@UTR3	0.058064987296878756,0.031588349391127764,-0.012429253235239413,-0.022692505611137462,0.022917480910225746,0.0052950611107499546,-0.07379089977571018	chr11_100992768_100992820_+@UTR3	-0.0737909	0.000526111	0.0121515	NA
TSPYL5	0.07654112685423736,0.2818154240582645,0.14566270467516582,0.2502342925575403,0.2457464518547919	0.0557592163044477,0.30095724298038457,0.18787390665020398,0.26784285431725824,0.1875667797477054	0.394102	0.369268	0.338552	0.358417	0.0939039	5	chr8_97273466_97273518_-@UTR3,chr8_97273690_97273742_-@UTR3,chr8_97274228_97274280_-@UTR3,chr8_97275068_97275120_-@UTR3,chr8_97275906_97275958_-@UTR3	-0.02072616265104449,0.019072891946492476,0.042052307883436,0.01753198568743214,-0.05801264136799836	chr8_97275906_97275958_-@UTR3	-0.0580126	0.0022758	0.0242117	NA
ZNF771	0.1644782189137028,0.8355217810862973	0.3071895424836601,0.6928104575163399	0.174309	0.315329	0.837401	0.696381	-0.855212	2	chr16_30414176_30414228_+@UTR3,chr16_30418538_30418590_+@UTR3	0.13678606339896662,-0.1389503193938677	chr16_30418538_30418590_+@UTR3	-0.13895	0.00516575	0.0374788	NA
SMYD4	0.28478220745662614,0.40253783684016237,0.3126799557032115	0.42495031616982837,0.3911111111111111,0.18393857271906053	0.398128	0.276884	0.490077	0.583965	0.523953	3	chr17_1779638_1779690_-@UTR3,chr17_1779782_1779834_-@UTR3,chr17_1780588_1780640_-@UTR3	0.13635695866197717,-0.013244220635267645,-0.12927037579250905	chr17_1779638_1779690_-@UTR3	0.136357	0.00148949	0.0198453	NA
ARHGAP19-SLIT1	0.42961530280799026,0.2263621662955446,0.20245220976870262,0.14157032112776255	0.36354878262392715,0.21297417502494154,0.19411569832529874,0.2293613440258326	0.330408	0.372653	0.4849	0.418954	-0.173584	4	chr10_97223450_97223502_-@UTR3,chr10_97225358_97225410_-@UTR3,chr10_97225498_97225550_-@UTR3,chr10_97225710_97225762_-@UTR3	-0.0647318507191243,-0.01195612541657895,-0.006760265495835305,0.08860825674345246	chr10_97225710_97225762_-@UTR3	0.0886083	0.00404931	0.0327195	NA
ATP6V0E1	0.5187118513708334,0.4151337919128069,0.06615435671635957	0.5520151913791367,0.3924414053039968,0.05554340331686647	0.64685	0.666515	0.340265	0.322377	-0.0432056	3	chr5_173034498_173034550_+@UTR3,chr5_173034722_173034774_+@UTR3,chr5_173034854_173034906_+@UTR3	0.033265927906335535,-0.022684652013094997,-0.010618755805930517	chr5_173034498_173034550_+@UTR3	0.0332659	0.00677543	0.0440627	NA
SF3B3	0.5499739029692743,0.37369422032663874,0.039025352337212944,0.03730652436687403	0.494468263405569,0.36994867666414494,0.07933241028497635,0.05625064964530976	0.639049	0.610187	0.0832648	0.118964	0.0666753	4	chr16_70571916_70571968_+@UTR3,chr16_70572076_70572128_+@UTR3,chr16_70573612_70573664_+@UTR3,chr16_70574814_70574866_+@UTR3	-0.055494572112126384,-0.003910293989556557,0.03995213196279188,0.018636704801478665	chr16_70571916_70571968_+@UTR3	-0.0554946	0.000317785	0.00947863	NA
MCM8	0.28758520672729226,0.2783297942728769,0.14220387296311682,0.11818923202388094,0.05654033759559309,0.04551347151056331,0.0716380849066765	0.23251288911472567,0.2528327246686911,0.14194094022988107,0.18686695852611557,0.04213209491826956,0.07007484299448025,0.07363954954783679	0.433832	0.416196	0.16641	0.187822	0.0598714	7	chr20_5994586_5994638_+@UTR3,chr20_5994910_5994962_+@UTR3,chr20_5995680_5995732_+@UTR3,chr20_5995824_5995876_+@UTR3,chr20_5996944_5996996_+@UTR3,chr20_5997896_5997948_+@UTR3,chr20_5998760_5998812_+@UTR3	-0.054972842092786606,-0.025633946651365314,-0.000525499093331383,0.06815972224516564,-0.014605237020889318,0.02415028688074245,0.0017522682663820843	chr20_5995824_5995876_+@UTR3	0.0681597	0.00749592	0.0462907	NA
CCDC50	0.4535121379320972,0.1410912432748975,0.059948824911137066,0.10168049769166802,0.1346133329065779,0.060901734227385956,0.048252229056236294	0.4013647649566246,0.13437560760800152,0.10682605774919925,0.0799762417532891,0.13816582202483316,0.06802167573899864,0.07126983016905392	0.431456	0.415891	0.153445	0.176183	0.0530071	7	chr3_191391750_191391802_+@UTR3,chr3_191392138_191392190_+@UTR3,chr3_191392662_191392714_+@UTR3,chr3_191393366_191393418_+@UTR3,chr3_191393536_191393588_+@UTR3,chr3_191394716_191394768_+@UTR3,chr3_191396674_191396726_+@UTR3	-0.05231179881750592,-0.007116865716903453,0.04634294215966654,-0.02210701272566286,0.0031285044366131387,0.006654199351711271,0.022520361826213198	chr3_191391750_191391802_+@UTR3	-0.0523118	0.000264081	0.00865185	NA
CA8	0.06615095430884904,0.05933101985733565,0.1173366107576634,0.16273857721226145,0.09326200115673801,0.17160690187005978,0.32957393483709274	0.06925915064581109,0.07283841011932153,0.07011057592950422,0.10088270000534139,0.1655924350287,0.1467458443825199,0.37457088388880183	0.413549	0.444784	0.237825	0.212158	-0.105048	7	chr8_60187608_60187660_-@UTR3,chr8_60187900_60187952_-@UTR3,chr8_60188066_60188118_-@UTR3,chr8_60188198_60188250_-@UTR3,chr8_60188946_60188998_-@UTR3,chr8_60189184_60189236_-@UTR3,chr8_60189746_60189798_-@UTR3	0.0014552563093696569,0.011794537117714332,-0.04846927518138429,-0.06295740913167042,0.07037375166223457,-0.026171890046633395,0.043616896254359716	chr8_60188946_60188998_-@UTR3	0.0703738	8.29e-05	0.0048165	NA
ACO1	0.4365277337618592,0.29586839598526393,0.10917254411605798,0.06083529651897398,0.09759602961784498	0.34423365778864495,0.23878318328446205,0.15109312398314956,0.13539810573058655,0.13049192921315683	0.533714	0.437679	0.17295	0.254595	0.286191	5	chr9_32450378_32450430_+@UTR3,chr9_32450706_32450758_+@UTR3,chr9_32454098_32454150_+@UTR3,chr9_32454338_32454390_+@UTR3,chr9_32454680_32454732_+@UTR3	-0.09127802843425203,-0.05612219676647939,0.04233090118754283,0.07482714628082136,0.033379862054341	chr9_32450378_32450430_+@UTR3	-0.091278	0.00161932	0.0206769	NA
POLR3H	0.1311447245276595,0.4628944678360963,0.40596080763624426	0.08442183274109676,0.5460480105541522,0.3695301567047511	0.612169	0.638066	0.213089	0.17931	-0.0597749	3	chr22_41526784_41526836_-@UTR3,chr22_41528532_41528584_-@UTR3,chr22_41528816_41528868_-@UTR3	-0.04661183521503319,0.08284648699774627,-0.036340981455364574	chr22_41528532_41528584_-@UTR3	0.0828465	0.00217426	0.0238567	NA
SMARCA5	0.09631541218637991,0.5296344086021505,0.32863082437275987,0.04541935483870968	0.08655451844820616,0.39319214070044634,0.42182820255909953,0.0984251382922479	0.480074	0.444868	0.333463	0.374059	0.109878	4	chr4_143553376_143553428_+@UTR3,chr4_143554080_143554132_+@UTR3,chr4_143554296_143554348_+@UTR3,chr4_143555458_143555510_+@UTR3	-0.010094251750899355,-0.13553333850642674,0.09199651253488389,0.051968216422511586	chr4_143554080_143554132_+@UTR3	-0.135533	0.00627579	0.0423134	NA
EXOC8	0.21128882208417651,0.29600867939348624,0.07406124374195112,0.10979745907232784,0.16753708509641663,0.1413067106116415	0.26396706363276706,0.27088495343486435,0.07544779885163631,0.19280864308932905,0.13049402427657547,0.06639751671482773	0.29313	0.24629	0.386712	0.426034	0.251181	6	chr1_231332810_231332862_-@UTR3,chr1_231333312_231333364_-@UTR3,chr1_231333500_231333552_-@UTR3,chr1_231334054_231334106_-@UTR3,chr1_231334564_231334616_-@UTR3,chr1_231335402_231335454_-@UTR3	0.05293088035023519,-0.02439336847939,0.0021297619147081642,0.08302295076488624,-0.036053615838562064,-0.07359926811539717	chr1_231334054_231334106_-@UTR3	0.083023	0.000350906	0.009858	NA
PPP2R5C	0.06363206020020622,0.06799870443204306,0.09003375724286883,0.1843347854780618,0.10089121262044913,0.11175453153051525,0.11250397279893642,0.0785185635177213,0.10983219626825019,0.08050021591094766	0.04563435570929225,0.040509350408607106,0.06497125514166459,0.18041512946797278,0.09010962826547447,0.12791108580244295,0.13438902788463286,0.11631419634545524,0.11853139722021973,0.08121457375423802	0.102445	0.0688884	0.307339	0.324371	0.572519	10	chr14_101765304_101765356_+@UTR3,chr14_101766326_101766378_+@UTR3,chr14_101912544_101912596_+@UTR3,chr14_101925324_101925376_+@UTR3,chr14_101926122_101926174_+@UTR3,chr14_101926478_101926530_+@UTR3,chr14_101926660_101926712_+@UTR3,chr14_101927000_101927052_+@UTR3,chr14_101927310_101927362_+@UTR3,chr14_101927496_101927548_+@UTR3	-0.01848527566773641,-0.027958865917187548,-0.02553283182855491,-0.004388104518515734,-0.011264317657154035,0.015606995640764468,0.021326370453055715,0.037170425132790924,0.008169082602645913,0.00018994461738315593	chr14_101927000_101927052_+@UTR3	0.0371704	0.000190548	0.00738551	NA
RBM7	0.6052549787038103,0.07787268331990331,0.12274893519051455,0.09921722113502934,0.0949061816507425	0.520124730821937,0.08183991945633023,0.17149788852532377,0.08620829487932433,0.14032916631708478	0.564575	0.502861	0.200851	0.246465	0.167007	5	chr11_114407932_114407984_+@UTR3,chr11_114408818_114408870_+@UTR3,chr11_114410210_114410262_+@UTR3,chr11_114410374_114410426_+@UTR3,chr11_114410580_114410632_+@UTR3	-0.08426579623449126,0.0038470060727881505,0.048595061546975044,-0.012899231940818906,0.04530828193647611	chr11_114407932_114407984_+@UTR3	-0.0842658	0.00614959	0.0418126	NA
KDELR3	0.8046933977166536,0.19530660228334643	0.6651761828326835,0.33482381716731635	0.815713	0.685588	0.247347	0.377473	0.250721	2	chr22_38482612_38482664_+@UTR3,chr22_38483356_38483408_+@UTR3	-0.13795505969277344,0.13749223614550793	chr22_38482612_38482664_+@UTR3	-0.137955	0.00484177	0.0361332	NA
PSMC6	0.7571537589482459,0.2428462410517541	0.8166536907277648,0.1833463092722352	0.757802	0.817142	0.244874	0.185534	-0.108766	2	chr14_52708306_52708358_+@UTR3,chr14_52727662_52727714_+@UTR3	0.059402089030476835,-0.0586554031029472	chr14_52708306_52708358_+@UTR3	0.0594021	0.00236274	0.0246664	NA
SLC39A1	0.07376880255072209,0.9262311974492778	0.10463611639681568,0.8953638836031844	0.91777	0.894984	0.288508	0.311293	0.0362697	2	chr1_153959090_153959142_-@UTR3,chr1_153959254_153959306_-@UTR3	0.030026356688778663,-0.03084114856677289	chr1_153959254_153959306_-@UTR3	-0.0308411	0.00395928	0.0324086	NA
POFUT2	0.9591431556948798,0.04085684430512017	0.7942968727357042,0.20570312726429585	0.0580578	0.21992	0.959722	0.797859	-1.92142	2	chr21_45263952_45264004_-@UTR3,chr21_45266798_45266850_-@UTR3	-0.16216065902357912,0.15675924745951508	chr21_45263952_45264004_-@UTR3	-0.162161	1.38e-06	0.000587582	NA
AP3M1	0.12360716306722937,0.17772933389875167,0.1899425490585348,0.25746748774841816,0.25125346622706596	0.13471216366060138,0.23251386648490358,0.17297198558972982,0.24608445229605383,0.21371753196871135	0.439114	0.414402	0.27434	0.305582	0.0835672	5	chr10_74121828_74121880_-@UTR3,chr10_74122502_74122554_-@UTR3,chr10_74123146_74123198_-@UTR3,chr10_74123472_74123524_-@UTR3,chr10_74123684_74123736_-@UTR3	0.011152849190123382,0.05474726684646333,-0.016875097983075266,-0.011302987346907045,-0.03740957749481505	chr10_74122502_74122554_-@UTR3	0.0547473	0.00269481	0.0262527	NA
KCNJ10	0.11747727581060914,0.156325464658798,0.11602903269569938,0.16129086962420294,0.1189051689051689,0.3299721883055216	0.17701304543409804,0.12370670265407108,0.03171390013495277,0.10728744939271255,0.0935672514619883,0.4667116509221772	0.396481	0.495402	0.300475	0.246239	-0.321348	6	chr1_160027222_160027274_-@UTR3,chr1_160027398_160027450_-@UTR3,chr1_160027544_160027596_-@UTR3,chr1_160027776_160027828_-@UTR3,chr1_160028146_160028198_-@UTR3,chr1_160030256_160030308_-@UTR3	0.0628974725617194,-0.027143626689906164,-0.07740588207920332,-0.047912920916550666,-0.01957819857093908,0.1374851756430704	chr1_160030256_160030308_-@UTR3	0.137485	0.00490412	0.0363446	NA
POLR3G	0.12399983241159712,0.13942332830568124,0.19678196748784982,0.2336366683425507,0.113005698005698,0.19315250544662307	0.20439685345434078,0.2066184747432109,0.09762711938933444,0.17158589242999858,0.10726990115379204,0.2125017588293232	0.315907	0.351079	0.355531	0.3204	-0.152296	6	chr5_90512390_90512442_+@UTR3,chr5_90512542_90512594_+@UTR3,chr5_90512930_90512982_+@UTR3,chr5_90513306_90513358_+@UTR3,chr5_90513626_90513678_+@UTR3,chr5_90513810_90513862_+@UTR3	0.07958247877502994,0.066619996884272,-0.0985084422635162,-0.061658297640942106,-0.005798967656251236,0.019138548151821255	chr5_90512930_90512982_+@UTR3	-0.0985084	7.04e-05	0.00447809	NA
ARNT	0.06522922013266579,0.07072377185970521,0.3529471159914174,0.5110998920162116	0.10546675258662803,0.09937631992639777,0.3691740278403486,0.42598289964662567	0.61053	0.566686	0.162974	0.213156	0.107512	4	chr1_150808744_150808796_-@UTR3-EX,chr1_150810074_150810126_-@UTR3,chr1_150811248_150811300_-@UTR3,chr1_150811898_150811950_-@UTR3	0.039588070012147786,0.028044978734442783,0.01587886943943151,-0.08488823868556378	chr1_150811898_150811950_-@UTR3	-0.0848882	0.00459605	0.0349917	NA
FNBP1L	0.25170477819649806,0.16630066461214632,0.2251593375758905,0.13279627073458905,0.18483004394710023,0.03920890493377591	0.2970031939524481,0.15865004337369265,0.17852735660091368,0.14705904183871624,0.15955249037648928,0.059207873857740234	0.392982	0.401427	0.263965	0.256021	-0.0306712	6	chr1_93551096_93551148_+@UTR3,chr1_93551274_93551326_+@UTR3,chr1_93552690_93552742_+@UTR3,chr1_93553710_93553762_+@UTR3,chr1_93553994_93554046_+@UTR3,chr1_93554488_93554540_+@UTR3	0.04498453609774705,-0.007805189991906408,-0.046661688319142997,0.014018875615862514,-0.025373222648265914,0.019708391463732634	chr1_93552690_93552742_+@UTR3	-0.0466617	0.00557023	0.0394268	NA
EIF4EBP2	0.15170205471579334,0.12994326138475393,0.07983306865038262,0.10075334473313262,0.11776441607291656,0.16034484096668214,0.045414123394315026,0.047832645867580105,0.04475951996903773,0.07177905598004786,0.049873668265358086	0.14073119964478234,0.10981659893528795,0.08267803535762068,0.09471643000538306,0.11654869330676043,0.1481007429068143,0.053586694102545816,0.055550656539245014,0.07017925348714084,0.07027992670122582,0.0578117690131937	0.312783	0.303349	0.185232	0.198908	0.0441846	11	chr10_70422000_70422052_+@UTR3,chr10_70422254_70422306_+@UTR3,chr10_70422702_70422754_+@UTR3,chr10_70423188_70423240_+@UTR3,chr10_70423332_70423384_+@UTR3,chr10_70423602_70423654_+@UTR3,chr10_70424160_70424212_+@UTR3,chr10_70424438_70424490_+@UTR3,chr10_70424946_70424998_+@UTR3,chr10_70425982_70426034_+@UTR3,chr10_70427316_70427368_+@UTR3	-0.011092893476649907,-0.020246690739547754,0.002704300439188928,-0.0061686811576171785,-0.0013488211691231877,-0.012364172164568726,0.008024745890388055,0.007570210979151261,0.025262951014778344,-0.001637971390042528,0.0077919164788183976	chr10_70424946_70424998_+@UTR3	0.025263	2.01e-06	0.00066458	NA
SRD5A3	0.2674058674058674,0.3176888426888427,0.4149052899052899	0.3749257278669043,0.39676173499702916,0.2283125371360666	0.416538	0.536069	0.53145	0.409195	-0.363971	3	chr4_55370276_55370328_+@UTR3,chr4_55370564_55370616_+@UTR3,chr4_55370888_55370940_+@UTR3	0.10583110294467246,0.07772933449517305,-0.18056084935757213	chr4_55370888_55370940_+@UTR3	-0.180561	0.00252356	0.0253835	NA
SIL1	0.16540404040404041,0.2162247474747475,0.618371212121212	0.3443359325712267,0.2941933530168824,0.36147071441189094	0.600001	0.467711	0.187376	0.368475	0.359347	3	chr5_138942458_138942510_-@UTR3-EX,chr5_138946702_138946754_-@UTR3,chr5_138946976_138947028_-@UTR3	0.17077741819623884,0.07300236663041765,-0.25169631370221773	chr5_138946976_138947028_-@UTR3	-0.251696	0.000232186	0.00823588	NA
MRPL14	0.06199582252953039,0.05185225199270143,0.05185225199270143,0.11942703831748774,0.714872635167579	0.052340781273749803,0.0940796473628211,0.1000797993616051,0.14767441860465116,0.6058253533971728	0.590816	0.548511	0.0981472	0.138691	0.107189	5	chr6_44096952_44097004_-@UTR3-EX,chr6_44098390_44098442_-@UTR3-EX,chr6_44102552_44102604_-@UTR3-EX,chr6_44113434_44113486_-@UTR3,chr6_44113668_44113720_-@UTR3	-0.009457861309615748,0.04191344917293379,0.04789106450390627,0.02806400686290869,-0.10782076099708149	chr6_44113668_44113720_-@UTR3	-0.107821	0.00110579	0.0173855	NA
FAM210B	0.22134861842238754,0.1765959608524338,0.18584117834397715,0.21731561688646814,0.1988986254947334	0.2157520766675192,0.15626116031360227,0.13656786023391795,0.2681599082844894,0.22325899450047126	0.368004	0.340981	0.368007	0.395191	0.110029	5	chr20_56366240_56366292_+@UTR3,chr20_56366764_56366816_+@UTR3,chr20_56367140_56367192_+@UTR3,chr20_56367906_56367958_+@UTR3,chr20_56368316_56368368_+@UTR3	-0.004954076830655019,-0.019596657341619028,-0.04842805845475337,0.05128707605940627,0.0249109474743667	chr20_56367906_56367958_+@UTR3	0.0512871	0.00364651	0.030876	NA
MRPL19	0.17726087316510444,0.10709779660238927,0.09603168781003445,0.09015607524868179,0.08701642348683457,0.04442144993266812,0.07522337066080477,0.06345241144217201,0.08790467230461207,0.07169568651273213,0.09973955283396634	0.1299516103154897,0.11148781082367432,0.1275424127703305,0.06465175436732017,0.08363889117289085,0.05429041753513408,0.0629241410121971,0.07847065544890373,0.09683146447379798,0.07783326432163713,0.11237757775862445	0.288182	0.275501	0.210268	0.227117	0.064927	11	chr2_75655638_75655690_+@UTR3,chr2_75656126_75656178_+@UTR3,chr2_75656328_75656380_+@UTR3,chr2_75656694_75656746_+@UTR3,chr2_75657000_75657052_+@UTR3,chr2_75657828_75657880_+@UTR3,chr2_75658448_75658500_+@UTR3,chr2_75659324_75659376_+@UTR3,chr2_75659566_75659618_+@UTR3,chr2_75661272_75661324_+@UTR3,chr2_75662072_75662124_+@UTR3	-0.04731702697625875,0.004247652362170284,0.03130788771540027,-0.025580707272129383,-0.003509792731979322,0.009710722805211625,-0.012403192722591813,0.014848972828372123,0.008762214144549973,0.00598828001230986,0.012472235103675483	chr2_75655638_75655690_+@UTR3	-0.047317	0.00281557	0.0265945	NA
SENP6	0.515211354877439,0.4847886451225611	0.6511385138093712,0.3488614861906288	0.515522	0.651362	0.485119	0.349279	-0.337425	2	chr6_75634688_75634740_+@UTR3,chr6_75715654_75715706_+@UTR3	0.13522463528174655,-0.13523855431325954	chr6_75715654_75715706_+@UTR3	-0.135239	1.86e-05	0.00244743	NA
EXOSC6	0.09712774160231048,0.05687423379117098,0.0648767376273737,0.1280727196692882,0.0964584249777939,0.16288625306088678,0.393703889271176	0.08339941514345607,0.05982477721208381,0.10749161101560434,0.13576287872109083,0.11432038359438518,0.1626936078418408,0.33650732647153897	0.441331	0.41741	0.209384	0.229122	0.0803977	7	chr16_70247046_70247098_-@UTR3,chr16_70247300_70247352_-@UTR3,chr16_70247634_70247686_-@UTR3,chr16_70248348_70248400_-@UTR3,chr16_70249024_70249076_-@UTR3,chr16_70249442_70249494_-@UTR3,chr16_70250306_70250358_-@UTR3	-0.013430538788553797,0.003232972753227696,0.04275749335756755,0.00793366299008788,0.01806912840642584,6.175705242406071e-05,-0.05684865069339384	chr16_70250306_70250358_-@UTR3	-0.0568487	0.00355122	0.0304246	NA
SH2B1	0.5703220219385464,0.4296779780614535	0.5011180627657305,0.4988819372342696	0.603635	0.540339	0.474998	0.538294	0.159812	2	chr16_28873554_28873606_+@UTR3,chr16_28874134_28874186_+@UTR3	-0.06916152062570624,0.06829539314673105	chr16_28873554_28873606_+@UTR3	-0.0691615	0.00530583	0.0382653	NA
LIG3	0.16625568860076406,0.18793987066294696,0.1010954463547772,0.11070680387392215,0.10964916805137939,0.1696747977879257,0.15467822466828443	0.27796230016702456,0.13822476735862563,0.09561918396564066,0.09985683607730851,0.08410880458124552,0.16397995705082316,0.14024815079933192	0.313655	0.329218	0.274055	0.252137	-0.0698648	7	chr17_35004696_35004748_+@UTR3,chr17_35004930_35004982_+@UTR3,chr17_35005248_35005300_+@UTR3,chr17_35005442_35005494_+@UTR3,chr17_35005966_35006018_+@UTR3,chr17_35009160_35009212_+@UTR3,chr17_35009478_35009530_+@UTR3	0.11054235082972219,-0.050235524790975206,-0.006247392465851098,-0.011613235821303178,-0.026230154347036155,-0.0064134711596297855,-0.015100959586127838	chr17_35004696_35004748_+@UTR3	0.110542	3.29e-05	0.00322193	NA
ZNF79	0.2928104575163399,0.18257080610021786,0.5246187363834423	0.3278882241961582,0.352367716075493,0.3197440597283488	0.363731	0.489775	0.567038	0.408599	-0.429246	3	chr9_127445342_127445394_+@UTR3,chr9_127445518_127445570_+@UTR3-EX,chr9_127446258_127446310_+@UTR3-EX	0.01051721454865473,0.14021955525505223,-0.2152851562080772	chr9_127446258_127446310_+@UTR3-EX	-0.215285	0.00719037	0.0453665	NA
VCPIP1	0.06252049915132205,0.0909878343234751,0.29012934820400715,0.08932537279900679,0.20021370463491966,0.26682324088726933	0.04156846919558785,0.12044749349834095,0.30839655636265806,0.1176289122051834,0.2173867814545781,0.19457178728365174	0.425582	0.411952	0.26578	0.281117	0.0469631	6	chr8_66630234_66630286_-@UTR3,chr8_66631942_66631994_-@UTR3,chr8_66632324_66632376_-@UTR3,chr8_66632896_66632948_-@UTR3,chr8_66633220_66633272_-@UTR3,chr8_66634440_66634492_-@UTR3	-0.020456270311020548,0.02968672922580716,0.01845339838964627,0.02857267418332389,0.017436702742410465,-0.07157261402640466	chr8_66634440_66634492_-@UTR3	-0.0715726	0.00702006	0.0448843	NA
ZMYM4	0.44723279669704574,0.25918231229407634,0.22989247215580247,0.06369241885307522	0.3827035843752011,0.2948780111025843,0.22545770752563862,0.0969606969965761	0.548061	0.521743	0.235119	0.262978	0.0709952	4	chr1_35419828_35419880_+@UTR3,chr1_35420144_35420196_+@UTR3,chr1_35421192_35421244_+@UTR3,chr1_35421686_35421738_+@UTR3	-0.06438276086060307,0.035584757428086866,-0.004444880411278773,0.033177710570006555	chr1_35419828_35419880_+@UTR3	-0.0643828	0.00346453	0.0299756	NA
ARF6	0.29616785962437325,0.19101418952109508,0.1364194195474524,0.19271340137334914,0.1384671554511047,0.04521797448262547	0.25192501511917603,0.20770421731528307,0.14290049363548754,0.199715440405518,0.1409765192839917,0.05677831424054372	0.43608	0.428162	0.163211	0.176927	0.026437	6	chr14_49894590_49894642_+@UTR3,chr14_49894728_49894780_+@UTR3,chr14_49894872_49894924_+@UTR3,chr14_49895006_49895058_+@UTR3,chr14_49895524_49895576_+@UTR3,chr14_49896914_49896966_+@UTR3	-0.04430665976611309,0.016554419401700493,0.006349069414566366,0.006878405342611166,0.002383794644437276,0.011412758728317998	chr14_49894590_49894642_+@UTR3	-0.0443067	0.000719376	0.0147652	NA
SHOC2	0.3408888888888889,0.16629698857736241,0.1520250343801746,0.23176458701692348,0.10902450113665069	0.27965983757107543,0.18788987186240344,0.178975041642236,0.26849181056325816,0.08498343836102706	0.437911	0.419486	0.305883	0.323321	0.0620151	5	chr10_111011826_111011878_+@UTR3,chr10_111012302_111012354_+@UTR3,chr10_111012818_111012870_+@UTR3,chr10_111013262_111013314_+@UTR3,chr10_111013634_111013686_+@UTR3	-0.061183731757667836,0.021309745878079878,0.026652686939998976,0.03640749356615927,-0.024187572559606532	chr10_111011826_111011878_+@UTR3	-0.0611837	0.00189821	0.022155	NA
NCBP1	0.17027003095848195,0.2836029647578662,0.12334395877673503,0.06339820900808678,0.06493614475654885,0.028302391048711826,0.07447528774542993,0.12749857193608752,0.06417244101205188	0.19332853701851715,0.18400348764536248,0.12085408794130337,0.07359511766332348,0.0795433275511603,0.0637267457829342,0.06768819918554357,0.12440785458453872,0.0928526426273167	0.34835	0.328822	0.20085	0.224915	0.0832307	9	chr9_97671230_97671282_+@UTR3,chr9_97671404_97671456_+@UTR3,chr9_97671602_97671654_+@UTR3,chr9_97671750_97671802_+@UTR3,chr9_97672174_97672226_+@UTR3,chr9_97672410_97672462_+@UTR3,chr9_97672764_97672816_+@UTR3,chr9_97673134_97673186_+@UTR3,chr9_97673582_97673634_+@UTR3	0.022205478101206627,-0.09994275449809656,-0.003312492831735653,0.009289216532791689,0.01368792272628537,0.034380184653577374,-0.007625349287111449,-0.0039229258735644645,0.027690455758750565	chr9_97671404_97671456_+@UTR3	-0.0999428	0.000130527	0.00620827	NA
TAB2	0.6239750611095641,0.376024938890436	0.4928833792470157,0.5071166207529844	0.644757	0.521499	0.411623	0.534881	0.306092	2	chr6_149410522_149410574_+@UTR3,chr6_149411364_149411416_+@UTR3	-0.12973967207261533,0.1303908984434109	chr6_149411364_149411416_+@UTR3	0.130391	0.000334375	0.00978247	NA
SYTL2	0.4935355748061115,0.5064644251938885	0.6256913167853094,0.3743086832146905	0.571818	0.459913	0.560871	0.672776	0.314195	2	chr11_85694624_85694676_-@UTR3,chr11_85694932_85694984_-@UTR3	0.12913803832154963,-0.1336770084763076	chr11_85694932_85694984_-@UTR3	-0.133677	0.00423451	0.0334588	NA
ZDHHC9	0.02700032778851553,0.02701752895472002,0.08401673129259755,0.1600928610704834,0.2566494052811221,0.2260387958215265,0.21918434979103485	0.05372036603187771,0.05214248364440011,0.06824148932655878,0.16488861465680216,0.24987867425482335,0.23306678675068382,0.17806158533485403	0.429814	0.40903	0.195273	0.221355	0.071504	7	chrX_129803414_129803466_-@UTR3,chrX_129804410_129804462_-@UTR3,chrX_129804914_129804966_-@UTR3,chrX_129805302_129805354_-@UTR3,chrX_129805466_129805518_-@UTR3,chrX_129805658_129805710_-@UTR3,chrX_129806258_129806310_-@UTR3	0.02585649138145148,0.02427228328527121,-0.016489059030536934,0.004088991360866184,-0.007358222921967306,0.00637752826891505,-0.041675591918588606	chrX_129806258_129806310_-@UTR3	-0.0416756	0.000444139	0.0113009	NA
UQCC1	0.18515629213569718,0.1719752829592647,0.3144565410011635,0.05630677484224395,0.13976145898342698,0.1323436500782039	0.1745029861693268,0.22068172974118472,0.3124071967875839,0.08054691016863819,0.07312447055151199,0.13873670658175444	0.194181	0.173555	0.389283	0.409763	0.162008	6	chr20_35302630_35302682_-@UTR3,chr20_35302770_35302822_-@UTR3,chr20_35303436_35303488_-@UTR3,chr20_35345474_35345526_-@UTR3,chr20_35345744_35345796_-@UTR3,chr20_35346540_35346592_-@UTR3	-0.011336162420058415,0.04780564546595989,-0.00264078161147302,0.023322859887982578,-0.06718394008400815,0.005628985764174227	chr20_35345744_35345796_-@UTR3	-0.0671839	0.00326472	0.0289984	NA
ATP2B4	0.23559250520286845,0.11966229714214915,0.20797124161641953,0.12077476334950828,0.19777078046992527,0.11822841221912929	0.2461009382940076,0.13889293347308337,0.1908899152777922,0.09797816738954668,0.14973518428914012,0.17640286127643004	0.338339	0.343799	0.312906	0.307649	-0.0230943	6	chr1_203740280_203740332_+@UTR3,chr1_203740464_203740516_+@UTR3,chr1_203742172_203742224_+@UTR3,chr1_203742340_203742392_+@UTR3,chr1_203743742_203743794_+@UTR3,chr1_203743912_203743964_+@UTR3	0.009122511846548248,0.017657244327323005,-0.018380121135932126,-0.024254203801735055,-0.049290985316224056,0.05649518092190227	chr1_203743912_203743964_+@UTR3	0.0564952	0.0051472	0.0374084	NA
RTN3	0.28416972629035514,0.1900080650157573,0.2372325394121303,0.17172304379945114,0.11686662548230624	0.2772269504393144,0.19023150646535883,0.23500503805940595,0.15060640336662745,0.14693010166929332	0.447403	0.435659	0.300066	0.313906	0.0383728	5	chr11_63758222_63758274_+@UTR3,chr11_63758608_63758660_+@UTR3,chr11_63758800_63758852_+@UTR3,chr11_63759006_63759058_+@UTR3,chr11_63759684_63759736_+@UTR3	-0.006970433392316566,0.00018723047960117478,-0.0022610963656650718,-0.021142583118950065,0.030009160131127685	chr11_63759684_63759736_+@UTR3	0.0300092	0.00490355	0.0363446	NA
ACAT2	0.33747422461194465,0.6625257753880553	0.2986839836169982,0.7013160163830018	0.458315	0.427688	0.714965	0.745592	0.0997822	2	chr6_159778810_159778862_+@UTR3,chr6_159779024_159779076_+@UTR3	-0.03859807569307905,0.03878140663847485	chr6_159779024_159779076_+@UTR3	0.0387814	0.00086285	0.0160357	NA
TBPL1	0.4994067482387838,0.1302681992337165,0.04682981090100111,0.07397107897664071,0.18011370658756642,0.06941045606229143	0.3434482539988433,0.17069232778394083,0.07599621999212046,0.1015916397115509,0.23453860190180864,0.07373295661173586	0.455987	0.41195	0.196257	0.246146	0.146525	6	chr6_133987214_133987266_+@UTR3,chr6_133987404_133987456_+@UTR3,chr6_133988192_133988244_+@UTR3,chr6_133989194_133989246_+@UTR3,chr6_133989524_133989576_+@UTR3,chr6_133990402_133990454_+@UTR3	-0.15513565155523334,0.03993887887862649,0.028725824639080487,0.027210834579351806,0.05387054594004426,0.004033873870719781	chr6_133987214_133987266_+@UTR3	-0.155136	0.00182466	0.0219686	NA
AL929236.1	0.04008475226593325,0.053301163607280655,0.0891838046351278,0.13403821437987465,0.1266005060165319,0.20569921353620682,0.1871544284917602,0.1639379170672847	0.056242227490503914,0.06226083323321046,0.08266186592788176,0.12104122233934901,0.12056188696520644,0.20117171893418231,0.16532069537615204,0.1907395497335141	0.368961	0.366131	0.204374	0.206959	0.0111084	8	chr1_214348818_214348870_-@UTR3,chr1_214348958_214349010_-@UTR3,chr1_214349680_214349732_-@UTR3,chr1_214352210_214352262_-@UTR3,chr1_214353180_214353232_-@UTR3,chr1_214355932_214355983_-@UTR3,chr1_214356476_214356528_-@UTR3,chr1_214357486_214357538_-@UTR3	0.016165067502633433,0.008971519914713406,-0.0065007988737446065,-0.012972963420469066,-0.006019609077501861,-0.0045112046545142115,-0.021806450899561375,0.02679882776063447	chr1_214357486_214357538_-@UTR3	0.0267988	0.000130584	0.00620827	NA
STAU2	0.09898613159086748,0.14278100635113386,0.1298329815634005,0.1613053073890961,0.35018648625206,0.11690808685344205	0.179209316125204,0.20625278148642637,0.12291944815309302,0.11730455422044207,0.3354250111259457,0.038888888888888896	0.341955	0.259647	0.32658	0.397846	0.397253	6	chr8_73420450_73420502_-@UTR3,chr8_73421144_73421196_-@UTR3,chr8_73550182_73550234_-@UTR3,chr8_73550676_73550728_-@UTR3,chr8_73550866_73550918_-@UTR3,chr8_73653636_73653688_-@UTR3	0.07705832410021042,0.060521385898812036,-0.008923701341434165,-0.045583464522021444,-0.01592789652258292,-0.079311629392437	chr8_73653636_73653688_-@UTR3	-0.0793116	0.00411244	0.0330088	NA
DSTN	0.518534925268577,0.3059745259716056,0.17549054875981732	0.5529546444871919,0.28501116560954426,0.16203418990326376	0.573083	0.602477	0.35366	0.331132	-0.0721603	3	chr20_17607040_17607092_+@UTR3,chr20_17607846_17607898_+@UTR3,chr20_17607974_17608025_+@UTR3	0.034427153673789235,-0.02092895151071472,-0.013418967475182647	chr20_17607040_17607092_+@UTR3	0.0344272	4.25e-05	0.00353868	NA
RAB32	0.8090048840048841,0.09987789987789987,0.09111721611721613	0.6444647607438306,0.19021770184560882,0.16531753741056066	0.791603	0.678017	0.177836	0.279921	0.223456	3	chr6_146554918_146554970_+@UTR3,chr6_146555362_146555414_+@UTR3-EX,chr6_146555612_146555664_+@UTR3-EX	-0.16037191155028307,0.08614369011494882,0.07061610435780785	chr6_146554918_146554970_+@UTR3	-0.160372	0.00187779	0.022155	NA
RPRD2	0.19482341574195408,0.09947178229947255,0.19275840311710243,0.12237287953848464,0.15640072080735842,0.1091706821257609,0.12500211636986697	0.19149237684519224,0.153988207088706,0.14139554250031797,0.08948321418029187,0.14783160663417258,0.11663558848163269,0.15917346426968662	0.3516	0.341338	0.306627	0.316451	0.0427376	7	chr1_150473552_150473604_+@UTR3,chr1_150474328_150474380_+@UTR3,chr1_150474508_150474560_+@UTR3,chr1_150474664_150474716_+@UTR3,chr1_150474944_150474996_+@UTR3,chr1_150475330_150475382_+@UTR3,chr1_150475860_150475912_+@UTR3	-0.004081951865908318,0.0533716608487539,-0.05186692827922071,-0.03356366203426443,-0.009362759570785334,0.006569212294971691,0.03314216347568799	chr1_150474328_150474380_+@UTR3	0.0533717	0.00356351	0.0304938	NA
RFC3	0.40792197886019393,0.5166430569176564,0.07543496422214957	0.3077236851725717,0.5192293631644366,0.17304695166299167	0.576486	0.489046	0.356167	0.436005	0.237315	3	chr13_33836342_33836394_+@UTR3,chr13_33837006_33837058_+@UTR3,chr13_33837418_33837470_+@UTR3	-0.09439597584444931,0.005863340044514054,0.10160768053668937	chr13_33837418_33837470_+@UTR3	0.101608	0.00187419	0.022155	NA
ORC2	0.044671352330496995,0.07590521585890132,0.1001475367360271,0.23033635986927278,0.282606985380931,0.2663325498243709	0.06684859730325078,0.10037940249320515,0.09804039641783403,0.19754530036129073,0.28618615706153694,0.25100014636288237	0.466743	0.446828	0.21247	0.23265	0.06291	6	chr2_200910150_200910202_-@UTR3,chr2_200910300_200910352_-@UTR3,chr2_200910508_200910560_-@UTR3,chr2_200910864_200910916_-@UTR3,chr2_200911000_200911052_-@UTR3,chr2_200911170_200911222_-@UTR3	0.022077727673718642,0.024371937504455585,-0.0021502782325596714,-0.03276432743521354,0.003525900139426552,-0.015337007126649038	chr2_200910864_200910916_-@UTR3	-0.0327643	0.00252078	0.0253835	NA
CMTM6	0.3898674600612408,0.39979731090022225,0.21033522903853694	0.3904808865449598,0.35116633588029467,0.25835277757474556	0.41426	0.424139	0.490827	0.479051	-0.033999	3	chr3_32481650_32481702_-@UTR3,chr3_32483094_32483146_-@UTR3,chr3_32483632_32483684_-@UTR3	0.0006910713598902163,-0.0484554172599142,0.048027206594524724	chr3_32483094_32483146_-@UTR3	-0.0484554	0.00322494	0.0288216	NA
BRWD3	0.030530924159090755,0.07191157108718294,0.10329543363463502,0.1300144671892203,0.07882439682353809,0.14128572729689087,0.21902074167424104,0.22511673813520103	0.06474487120689583,0.08024397830752066,0.08372974675455146,0.16280252557603286,0.12079190018608783,0.11676534156252684,0.18007647990253042,0.1908451565038541	0.380528	0.358756	0.185784	0.210445	0.0849996	8	chrX_80672616_80672668_-@UTR3,chrX_80672912_80672964_-@UTR3,chrX_80673598_80673650_-@UTR3,chrX_80675170_80675222_-@UTR3,chrX_80675466_80675518_-@UTR3,chrX_80675816_80675868_-@UTR3,chrX_80676078_80676130_-@UTR3,chrX_80676562_80676614_-@UTR3	0.0335867319910716,0.00779686396693853,-0.020007565645849254,0.032217152961290546,0.041333510269637413,-0.024939746186196793,-0.03926480119192846,-0.034589776206300465	chrX_80675466_80675518_-@UTR3	0.0413335	1.23e-05	0.00193179	NA
MCC	0.0906221976051063,0.14938281373635068,0.17233014190008966,0.10127591391042885,0.0650399588542491,0.10860697895236589,0.19073495278788835,0.12200704225352112	0.09346922372679271,0.10872828308635667,0.15555803951626637,0.14739556719468574,0.10624654019758133,0.11605374936126724,0.08219159853517288,0.19035699838187703	0.308534	0.315411	0.276921	0.269688	-0.0318003	8	chr5_113022352_113022404_-@UTR3,chr5_113022494_113022546_-@UTR3,chr5_113024380_113024432_-@UTR3,chr5_113024690_113024742_-@UTR3,chr5_113024830_113024882_-@UTR3,chr5_113025872_113025924_-@UTR3,chr5_113026576_113026628_-@UTR3,chr5_113027028_113027080_-@UTR3	0.0007377946008436803,-0.04208698039447391,-0.018645623684383328,0.04363631153036836,0.03859783866243814,0.005154305929499725,-0.10932442760608134,0.0656176463024008	chr5_113026576_113026628_-@UTR3	-0.109324	0.00149345	0.0198615	NA
TGOLN2	0.11921107547149938,0.18480411967770424,0.1877976324524673,0.19113788084843217,0.15590501543074964,0.16114427611914728	0.10198129073281197,0.18974003521625019,0.17738690766256224,0.18606531871021995,0.16581867577876983,0.17900777189938588	0.382347	0.391506	0.27269	0.25861	-0.0341528	6	chr2_85318244_85318296_-@UTR3,chr2_85320404_85320456_-@UTR3,chr2_85321596_85321648_-@UTR3,chr2_85321888_85321940_-@UTR3,chr2_85322058_85322110_-@UTR3,chr2_85322652_85322704_-@UTR3	-0.0172228461459272,0.004931953617637069,-0.010406377404499317,-0.005070308720728278,0.00990826728399069,0.01785346131266194	chr2_85322652_85322704_-@UTR3	0.0178535	0.00263744	0.0259921	NA
AHCTF1	0.5478149551777017,0.3054266393747171,0.1467584054475812	0.424871574290279,0.4440022940477654,0.13112613166195572	0.296097	0.320571	0.633261	0.611803	-0.114573	3	chr1_246840032_246840084_-@UTR3,chr1_246840188_246840240_-@UTR3,chr1_246840514_246840566_-@UTR3	-0.12105880684312054,0.13666818838387462,-0.01553159077668878	chr1_246840188_246840240_-@UTR3	0.136668	0.000914016	0.0165207	NA
APTX	0.021509286874406314,0.1579454419079803,0.49320291315098924,0.3273423580666241	0.07071577712205139,0.16834032199616913,0.4054672050525443,0.3554766958292351	0.520843	0.517021	0.329225	0.332335	0.0106268	4	chr9_32972310_32972362_-@UTR3,chr9_32972590_32972642_-@UTR3,chr9_32972732_32972784_-@UTR3,chr9_32973354_32973406_-@UTR3	0.049212002935916974,0.010656506444897323,-0.08707333147645568,0.02818013798596447	chr9_32972732_32972784_-@UTR3	-0.0870733	0.0041084	0.0330088	NA
SRP54	0.7067414150240395,0.29325858497596047	0.6145773706416907,0.38542262935830934	0.753529	0.683552	0.439589	0.509565	0.14061	2	chr14_35029160_35029212_+@UTR3,chr14_35029342_35029394_+@UTR3	-0.09182550274504298,0.09116885841023775	chr14_35029160_35029212_+@UTR3	-0.0918255	0.00018293	0.00720587	NA
H1-0	0.4146776280742314,0.20663198584705533,0.09772439850834676,0.2809659875703665	0.42252493292674126,0.17676185416213827,0.09565643420388524,0.3050567787072352	0.481452	0.479358	0.355419	0.356968	0.00628876	4	chr22_37806124_37806176_+@UTR3,chr22_37806876_37806928_+@UTR3,chr22_37807042_37807094_+@UTR3,chr22_37807246_37807298_+@UTR3	0.007766340996592513,-0.029950133502584603,-0.002179385248636298,0.02398713177680789	chr22_37806876_37806928_+@UTR3	-0.0299501	0.00553191	0.0393162	NA
NT5C3A	0.2546855542206845,0.34531490882671406,0.39999953695260143	0.21444388730205402,0.45070164937483376,0.33485446332311225	0.439028	0.384966	0.425571	0.465829	0.189583	3	chr7_33014314_33014366_-@UTR3,chr7_33014602_33014654_-@UTR3,chr7_33017398_33017450_-@UTR3	-0.04004551454742564,0.1047314458458084,-0.06473048061070802	chr7_33014602_33014654_-@UTR3	0.104731	0.00119091	0.0179193	NA
LRRC46	0.08355791689125025,0.9164420831087497	0.2782230506368437,0.7217769493631563	0.169448	0.344926	0.920238	0.74476	-1.02545	2	chr17_47837200_47837252_+@UTR3,chr17_47837698_47837750_+@UTR3	0.1833778345646251,-0.18998121665820322	chr17_47837698_47837750_+@UTR3	-0.189981	0.00068358	0.0144029	NA
FYTTD1	0.21035656801645353,0.13587277377257292,0.1910394564774082,0.08208208115849558,0.16470802873874205,0.13441565637540664,0.0815254354609211	0.22081252202920412,0.14520616703307837,0.1695705385760491,0.09377330809955739,0.16927753860225658,0.11446296259135484,0.08689696306849967	0.275799	0.285229	0.319285	0.314966	-0.0485006	7	chr3_197773426_197773478_+@UTR3,chr3_197781974_197782026_+@UTR3,chr3_197782278_197782330_+@UTR3,chr3_197782788_197782840_+@UTR3,chr3_197783204_197783256_+@UTR3,chr3_197783474_197783526_+@UTR3,chr3_197783756_197783808_+@UTR3	0.010442138425854508,0.009321941885695878,-0.021457690034496824,0.01167745130736228,0.0045595181535068585,-0.019941003052063325,0.005363061786421139	chr3_197782278_197782330_+@UTR3	-0.0214577	0.00451784	0.0346144	NA
RNF24	0.04366075535240882,0.10424711027393475,0.11973488535837735,0.05223367819267679,0.05536606521774803,0.14246944280322701,0.11919776657879283,0.14139309225197783,0.08313097151073719,0.13856623246011937	0.06664412521089544,0.11561771647272458,0.139904523374367,0.06519493635317705,0.09140671466396172,0.09789288518073792,0.0993020596199275,0.09816770643021702,0.08709299361981213,0.13877633907417974	0.301751	0.273718	0.219523	0.249926	0.140668	10	chr20_3927318_3927370_-@UTR3,chr20_3928028_3928080_-@UTR3,chr20_3928202_3928254_-@UTR3,chr20_3929892_3929944_-@UTR3,chr20_3930132_3930184_-@UTR3,chr20_3932260_3932312_-@UTR3,chr20_3932400_3932452_-@UTR3,chr20_3932598_3932650_-@UTR3,chr20_3932858_3932910_-@UTR3,chr20_3933790_3933842_-@UTR3	0.0243848882319364,0.012754232031512935,0.02147491611447004,0.014369546018684003,0.037318122692204185,-0.042953803196737306,-0.018379620462502105,-0.041606933129199955,0.0053926836458070004,0.001574696827985056	chr20_3932260_3932312_-@UTR3	-0.0429538	0.00193122	0.0223393	NA
SH3KBP1	0.09561135775064744,0.2516748366013072,0.2118101800468615,0.44090362560118385	0.08423067278731051,0.30277257992576806,0.17991681352432684,0.43307993376259457	0.533226	0.52186	0.287751	0.299332	0.031084	4	chrX_19535380_19535432_-@UTR3,chrX_19535656_19535708_-@UTR3,chrX_19536042_19536094_-@UTR3,chrX_19536290_19536342_-@UTR3	-0.011458166518482013,0.050911099310471886,-0.03192215239269339,-0.007867648990675824	chrX_19535656_19535708_-@UTR3	0.0509111	0.00222631	0.0239592	NA
FXR1	0.4391128493345397,0.25271316088799395,0.25672811814013474,0.05144587163733152	0.3885156550193225,0.2238426690749429,0.2986428971759045,0.08899877872983007	0.553305	0.528653	0.10697	0.14704	0.0657551	4	chr3_180976336_180976388_+@UTR3,chr3_180976468_180976520_+@UTR3,chr3_180976688_180976740_+@UTR3,chr3_180979338_180979390_+@UTR3	-0.050478328166764175,-0.02878914831864457,0.04186633903710035,0.037514999111504396	chr3_180976336_180976388_+@UTR3	-0.0504783	1.37e-05	0.0020537	NA
RPL14	0.7611243828635132,0.1091799930674611,0.10066046485483825,0.029035159214187343	0.5930544005678218,0.16832732290627808,0.18136456622253394,0.05725371030336631	0.632991	0.584493	0.0880194	0.151647	0.114999	4	chr3_40462254_40462306_+@UTR3,chr3_40462868_40462920_+@UTR3,chr3_40464268_40464320_+@UTR3,chr3_40466922_40466974_+@UTR3	-0.16745069734672868,0.05802564452583894,0.07947133849836033,0.027179216709805804	chr3_40462254_40462306_+@UTR3	-0.167451	0.000494483	0.0119536	NA
BMS1	0.7476851851851851,0.2523148148148148	0.47737556561085975,0.5226244343891403	0.751954	0.486379	0.265261	0.530835	0.628563	2	chr10_42831370_42831422_+@UTR3,chr10_42834312_42834364_+@UTR3	-0.25751633986928113,0.24134765017117954	chr10_42831370_42831422_+@UTR3	-0.257516	0.00257303	0.025582	NA
RAB11A	0.5998250793320501,0.14288101559696784,0.0798643485301395,0.041977625627420134,0.09136249378082079,0.04408943713260157	0.5402411773402936,0.13762905592138933,0.0989365496377677,0.06434919876715912,0.09388378996212769,0.06496022837126253	0.598354	0.554156	0.161299	0.190666	0.110706	6	chr15_65887896_65887948_+@UTR3,chr15_65889416_65889468_+@UTR3,chr15_65890676_65890728_+@UTR3,chr15_65890922_65890974_+@UTR3,chr15_65891232_65891284_+@UTR3,chr15_65891548_65891600_+@UTR3	-0.05947349436488347,-0.0053103871944359116,0.018932656911220272,0.02222692071331011,0.002426443884400817,0.020730871272687988	chr15_65887896_65887948_+@UTR3	-0.0594735	0.0044926	0.034494	NA
ANKRD46	0.30489926739926737,0.2748168498168498,0.4202838827838828	0.0831043956043956,0.29063644688644685,0.6262591575091575	0.510978	0.679384	0.38801	0.188684	-0.410966	3	chr8_100521242_100521294_-@UTR3,chr8_100522148_100522200_-@UTR3,chr8_100522500_100522552_-@UTR3	-0.2129919888540578,0.016738263864700675,0.20072371221796514	chr8_100521242_100521294_-@UTR3	-0.212992	0.000208686	0.00781388	NA
CGNL1	0.29084762500947764,0.40574461778891496,0.18098039989748468,0.12242735730412273	0.46094877344877355,0.20080266955266957,0.22844516594516595,0.10980339105339106	0.421258	0.51873	0.37331	0.305584	-0.30028	4	chr15_57547586_57547638_+@UTR3,chr15_57549656_57549708_+@UTR3,chr15_57550484_57550536_+@UTR3,chr15_57550686_57550738_+@UTR3	0.18152852456435958,-0.18417252306704643,0.06537331523808873,0.008584639010602496	chr15_57549656_57549708_+@UTR3	-0.184173	0.00107103	0.0171475	NA
SPPL2A	0.05574541606956109,0.06863301823538097,0.09808349091510062,0.09805922549534862,0.15616564231344873,0.52331320697116	0.08756185115561642,0.06973006553234988,0.13784353911587002,0.11295358557081248,0.15217560596819327,0.43973535265715796	0.528132	0.479666	0.176663	0.217554	0.138867	6	chr15_50704384_50704436_-@UTR3,chr15_50704794_50704846_-@UTR3,chr15_50705456_50705508_-@UTR3,chr15_50705772_50705824_-@UTR3,chr15_50706968_50707020_-@UTR3,chr15_50707758_50707810_-@UTR3	0.03193621777407888,0.0013070668979493771,0.03981081166482618,0.015063103487885116,-0.003776365690102673,-0.08319000347984395	chr15_50707758_50707810_-@UTR3	-0.08319	0.000971921	0.0166973	NA
STAMBP	0.21686394504659937,0.2223284259209163,0.19920106764774836,0.10871952404712239,0.12078466498744593,0.1321023723501676	0.17563817980022198,0.1952028610186213,0.13173017634726847,0.15415895918115674,0.11633062029843383,0.2269392033542977	0.391332	0.339531	0.239015	0.305639	0.204853	6	chr2_73862824_73862876_+@UTR3,chr2_73863202_73863254_+@UTR3,chr2_73863466_73863518_+@UTR3,chr2_73864088_73864140_+@UTR3,chr2_73866422_73866474_+@UTR3,chr2_73867050_73867102_+@UTR3	-0.04461577996934199,-0.030652095567126114,-0.07081363974616098,0.04054106994536616,-0.008801400823629235,0.08954749977868345	chr2_73867050_73867102_+@UTR3	0.0895475	0.00208783	0.0232809	NA
KCTD6	0.7313076530848747,0.2686923469151254	0.5247055484603377,0.47529445153966227	0.769448	0.606668	0.404957	0.567737	0.342917	2	chr3_58501854_58501906_+@UTR3,chr3_58502066_58502118_+@UTR3	-0.20517017293959783,0.19665404493845995	chr3_58501854_58501906_+@UTR3	-0.20517	4.57e-05	0.0037673	NA
TRDMT1	0.2352876592007027,0.15711462450592886,0.08454106280193237,0.5230566534914362	0.1006209775255485,0.24666378796290586,0.20083071165669403,0.45188452285485164	0.548878	0.53885	0.288511	0.296184	0.0266016	4	chr10_17143202_17143254_-@UTR3,chr10_17148128_17148180_-@UTR3,chr10_17148294_17148346_-@UTR3,chr10_17160344_17160396_-@UTR3	-0.13476842200670713,0.08226655611168737,0.10822557579785895,-0.07231090119092781	chr10_17143202_17143254_-@UTR3	-0.134768	0.00238529	0.0247194	NA
GINS4	0.18191170968948747,0.29592218481107374,0.09212495323606434,0.31322484100261877,0.11681631126075571	0.06730783534907248,0.28840689665431934,0.2789678820606656,0.23729191770428884,0.1280254682316538	0.413968	0.387052	0.327799	0.359703	0.0969909	5	chr8_41542216_41542268_+@UTR3,chr8_41542728_41542780_+@UTR3,chr8_41543148_41543200_+@UTR3,chr8_41543548_41543600_+@UTR3,chr8_41544560_41544612_+@UTR3	-0.1141132667416248,-0.009191969354369445,0.18294860179610317,-0.07540782864633588,0.010145938099840102	chr8_41543148_41543200_+@UTR3	0.182949	7.41e-05	0.00456015	NA
NUMB	0.04739647478367742,0.20415731604149076,0.43051931241909597,0.3179268967557359	0.09651591992502696,0.16163922440882783,0.3835673179117946,0.35827753775435056	0.554285	0.540905	0.249243	0.265768	0.0352542	4	chr14_73275190_73275242_-@UTR3,chr14_73275646_73275698_-@UTR3,chr14_73275788_73275840_-@UTR3,chr14_73275976_73276028_-@UTR3	0.04980846662426832,-0.041435460068499574,-0.046036519225357175,0.040837313036336476	chr14_73275190_73275242_-@UTR3	0.0498085	0.00653254	0.0430826	NA
FAM160B1	0.24229086229086227,0.19116763822646177,0.1706369394604689,0.1293991470462059,0.1282829888712242,0.13822242410477706	0.22477163210482187,0.20480286103452447,0.212190436013344,0.11017424097836521,0.11172327981973744,0.1363375500492069	0.391346	0.394903	0.287166	0.283144	-0.0130524	6	chr10_114861664_114861716_+@UTR3,chr10_114862380_114862432_+@UTR3,chr10_114862544_114862596_+@UTR3,chr10_114862742_114862794_+@UTR3,chr10_114863862_114863914_+@UTR3,chr10_114864482_114864534_+@UTR3	-0.017483079461486722,0.013599929503187613,0.04145805934530833,-0.019191805829068945,-0.016533564544323906,-0.0018836693942235194	chr10_114862544_114862596_+@UTR3	0.0414581	0.00652685	0.0430826	NA
FAF2	0.26723994738114837,0.257453378480673,0.205314377636996,0.2699922965011827	0.26356439112119306,0.2411853165244111,0.18064695372541764,0.3146033386289782	0.42837	0.40701	0.387327	0.41445	0.0737914	4	chr5_176506988_176507040_+@UTR3,chr5_176507320_176507372_+@UTR3,chr5_176507534_176507586_+@UTR3,chr5_176508402_176508454_+@UTR3	-0.0036033010272066845,-0.016172932601322992,-0.024562204409615235,0.044623673542634634	chr5_176508402_176508454_+@UTR3	0.0446237	0.00328789	0.0290972	NA
VEZF1	0.07685027553941412,0.06624593190136262,0.1610976275770283,0.2936848849582932,0.40212128002390174	0.13132514003543413,0.08400146618461024,0.1265001212777429,0.2876520836628196,0.3705211888393931	0.527915	0.494603	0.216359	0.246491	0.0940334	5	chr17_57971530_57971582_-@UTR3,chr17_57972080_57972132_-@UTR3,chr17_57972544_57972596_-@UTR3,chr17_57973718_57973769_-@UTR3,chr17_57974406_57974458_-@UTR3	0.05565819736000087,0.01912894458242996,-0.033128123033726475,-0.004885460903974348,-0.030537917248772695	chr17_57971530_57971582_-@UTR3	0.0556582	0.00743624	0.046185	NA
H2BC17	0.42216117216117216,0.35164835164835156,0.2261904761904762	0.6084010840108401,0.16333124869710236,0.22826766729205752	0.551088	0.571304	0.28344	0.25727	-0.0519754	3	chr6_27895152_27895204_+@UTR3-EX,chr6_27895956_27896008_+@UTR3-EX,chr6_27900400_27900452_+@UTR3-EX	0.16754287892352587,-0.19954564676564143,-0.015252585040075012	chr6_27895956_27896008_+@UTR3-EX	-0.199546	0.00188515	0.022155	NA
ARPC4	0.7649067589254935,0.23509324107450644	0.7161682964109422,0.2838317035890578	0.781304	0.736633	0.295708	0.340379	0.0849375	2	chr3_9806462_9806514_+@UTR3,chr3_9807056_9807108_+@UTR3	-0.04838674346217786,0.049024797647170465	chr3_9807056_9807108_+@UTR3	0.0490248	0.002806	0.0265945	NA
PDHA1	0.4467924273483432,0.08659351951751722,0.10685917725858446,0.12476357490252439,0.0995416874138557,0.08629541431731608,0.04915419924185895	0.3561184440148739,0.1252259440484341,0.10921386908837072,0.14153846670156928,0.11772389687621655,0.08713100559784141,0.06304837367269407	0.436572	0.412047	0.194902	0.220669	0.0834101	7	chrX_19359746_19359798_+@UTR3,chrX_19360060_19360112_+@UTR3,chrX_19360206_19360258_+@UTR3,chrX_19360716_19360768_+@UTR3,chrX_19360916_19360968_+@UTR3,chrX_19361286_19361338_+@UTR3,chrX_19361624_19361676_+@UTR3	-0.09045254137356301,0.038428687993757746,0.002279962683389508,0.016642349549740254,0.018049279940390295,0.0007563813779623146,0.013774218079856869	chrX_19359746_19359798_+@UTR3	-0.0904525	0.0019553	0.0225091	NA
SLC39A13	0.7429268406803163,0.21590548987330735,0.04116766944637627	0.6042256178079607,0.27806074325598945,0.1177136389360498	0.683622	0.627424	0.0489874	0.127245	0.123759	3	chr11_47415386_47415438_+@UTR3,chr11_47416466_47416518_+@UTR3,chr11_47451418_47451470_+@UTR3-EX	-0.13739828201096993,0.060675386835375156,0.07475523298104728	chr11_47415386_47415438_+@UTR3	-0.137398	0.000215913	0.007864	NA
FAM126B	0.08938240032092869,0.07537269306388696,0.10513924669512402,0.09418295860312446,0.109699944213568,0.1223235571267689,0.16526072321781152,0.23863847675878738	0.0905905905905906,0.07982982982982983,0.09096596596596596,0.10197697697697698,0.20445445445445445,0.1637887887887888,0.1273773773773774,0.14101601601601602	0.3572	0.34319	0.203641	0.221751	0.0577244	8	chr2_200974472_200974524_-@UTR3,chr2_200975968_200976020_-@UTR3,chr2_200976404_200976456_-@UTR3,chr2_200978994_200979046_-@UTR3,chr2_200979308_200979360_-@UTR3,chr2_200979910_200979962_-@UTR3,chr2_200980850_200980902_-@UTR3,chr2_200980998_200981050_-@UTR3	0.0015998122366993744,0.004733269506317847,-0.013786567248658788,0.008223664112279677,0.09402026130828119,0.04119772013515552,-0.037117016759045995,-0.09616153089837684	chr2_200980998_200981050_-@UTR3	-0.0961615	0.000542243	0.0124373	NA
RGS17	0.133005037867414,0.08772873363805204,0.13323635716589374,0.11501996241061402,0.10955548882883485,0.23487983629711187,0.18657458379207956	0.051394492328381926,0.06305779693135277,0.1850357601320374,0.067098386209426,0.13039840454795526,0.20316033987407545,0.2998548199767712	0.370092	0.415763	0.254498	0.196648	-0.167877	7	chr6_153003520_153003572_-@UTR3-EX,chr6_153006698_153006750_-@UTR3,chr6_153007232_153007284_-@UTR3,chr6_153008514_153008566_-@UTR3,chr6_153008786_153008838_-@UTR3,chr6_153011218_153011270_-@UTR3,chr6_153011574_153011626_-@UTR3	-0.08117412117449796,-0.02495786031437386,0.05073962289399994,-0.04791017152036349,0.020144314441579672,-0.031848559417222866,0.11168088704086879	chr6_153011574_153011626_-@UTR3	0.111681	0.000290656	0.00892401	NA
KIAA1549	0.11996075133165125,0.1278431922250257,0.10352186711522286,0.11531866180730772,0.1435438276796561,0.38981169984113634	0.06517450214409197,0.08734368334792664,0.07639029209043352,0.1887783166071709,0.21119165487977373,0.37112155093060323	0.423131	0.464354	0.233006	0.181772	-0.13412	6	chr7_138834420_138834472_-@UTR3,chr7_138835362_138835414_-@UTR3,chr7_138836106_138836158_-@UTR3,chr7_138836746_138836798_-@UTR3,chr7_138837196_138837248_-@UTR3,chr7_138837526_138837578_-@UTR3	-0.05542079216744632,-0.04112812685250128,-0.027946557187133417,0.07179150197925889,0.06608549545462633,-0.019293134294934733	chr7_138836746_138836798_-@UTR3	0.0717915	0.00401037	0.0325648	NA
BRSK2	0.5661342773188284,0.3348061840285626,0.09905953865260897	0.337786396609926,0.5672628025569203,0.09495080083315377	0.660292	0.566246	0.264287	0.358598	0.221676	3	chr11_1461532_1461584_+@UTR3,chr11_1462086_1462138_+@UTR3,chr11_1462648_1462700_+@UTR3	-0.21997779983239157,0.2329651049699541,0.003535912246747014	chr11_1462086_1462138_+@UTR3	0.232965	0.000129974	0.00620827	NA
KIRREL1	0.13170867790825339,0.11314178728321046,0.10215002138022806,0.08482733463796466,0.12739560506103056,0.0989214956444328,0.09839253817801817,0.08047997508197446,0.08459949175292279,0.07838307307196464	0.11724013956314916,0.10371942012563648,0.09095499034861226,0.07670322858995912,0.13835084479645682,0.10392660003755755,0.10016215986921273,0.09708974670129475,0.09531425937828199,0.07653861058983923	0.284637	0.271273	0.252548	0.264239	0.0693821	10	chr1_158096110_158096162_+@UTR3,chr1_158096388_158096440_+@UTR3,chr1_158097308_158097360_+@UTR3,chr1_158097924_158097976_+@UTR3,chr1_158098178_158098230_+@UTR3,chr1_158098746_158098798_+@UTR3,chr1_158098934_158098986_+@UTR3,chr1_158099304_158099356_+@UTR3,chr1_158099638_158099690_+@UTR3,chr1_158100026_158100078_+@UTR3	-0.014197152436347477,-0.009148305890151434,-0.010915433143116438,-0.007843601681353174,0.011206399620780821,0.00526982333519059,0.0020362567642204094,0.01687135794715762,0.01097704082550012,-0.0015688740097496434	chr1_158099304_158099356_+@UTR3	0.0168714	0.00579565	0.0403912	NA
LGALSL	0.5531073446327683,0.0696066122619795,0.20257899142079938,0.1747070516844528	0.4090683621933622,0.14919282106782106,0.3391053391053391,0.10263347763347763	0.506937	0.497156	0.267467	0.279316	0.0281073	4	chr2_64458606_64458658_+@UTR3,chr2_64458972_64459024_+@UTR3,chr2_64460074_64460126_+@UTR3,chr2_64461274_64461326_+@UTR3	-0.14326409342790847,0.0747613420519749,0.13116434697106436,-0.07404647617798808	chr2_64458606_64458658_+@UTR3	-0.143264	0.000589541	0.0130551	NA
GAK	0.5496732707883031,0.450326729211697	0.6303977272727272,0.3696022727272727	0.450784	0.370127	0.550048	0.630705	0.284417	2	chr4_849312_849364_-@UTR3,chr4_911758_911810_-@UTR3	0.08006145564012057,-0.08009831892141717	chr4_911758_911810_-@UTR3	-0.0800983	0.00469564	0.0355261	NA
ZBTB33	0.23039512681301966,0.12779600086552836,0.08519741587326568,0.07321771644766177,0.15287468526241246,0.27594077032024555,0.05457828441786661	0.28547415968563405,0.11448435257119581,0.09383375743702269,0.08963299163736063,0.14013643100371342,0.2129322121503933,0.0635060955146802	0.318084	0.349078	0.306751	0.28022	-0.13414	7	chrX_120255414_120255466_+@UTR3,chrX_120255838_120255890_+@UTR3,chrX_120256798_120256850_+@UTR3,chrX_120257258_120257310_+@UTR3,chrX_120257576_120257628_+@UTR3,chrX_120258198_120258250_+@UTR3,chrX_120258366_120258418_+@UTR3	0.05510930209065651,-0.013013074574974817,0.008878801958502713,0.01662796064044071,-0.012444867834093848,-0.06256763156147455,0.00917624158556124	chrX_120258198_120258250_+@UTR3	-0.0625676	0.00165392	0.0208915	NA
GOLGA8A	0.05123406751963068,0.08889982538087407,0.22784797076009147,0.22571553131290026,0.22331142975777699,0.1829911752687265	0.058455375796300724,0.12155860485118296,0.19897687259584004,0.23233028686322077,0.2225966566247869,0.1660822032686686	0.41547	0.402263	0.23783	0.252183	0.0466035	6	chr15_34379106_34379158_-@UTR3,chr15_34379310_34379362_-@UTR3,chr15_34379934_34379986_-@UTR3,chr15_34380466_34380518_-@UTR3,chr15_34380830_34380882_-@UTR3,chr15_34380976_34381028_-@UTR3	0.007504467323798648,0.03287583680840811,-0.028566360187463308,0.0068485968298814814,-0.0004716648121381173,-0.016621493440285406	chr15_34379310_34379362_-@UTR3	0.0328758	0.00107057	0.0171475	NA
TMEM237	0.05820971867007674,0.17421142369991474,0.09705882352941175,0.15133844842284738,0.14364023870417736,0.1175532821824382,0.25798806479113384	0.13193062702496663,0.18127692014484467,0.18914173178324123,0.14521059653135124,0.11311606632361348,0.0868813925417699,0.1524426656502128	0.36847	0.291927	0.233822	0.32231	0.335941	7	chr2_201620434_201620486_-@UTR3,chr2_201621088_201621140_-@UTR3,chr2_201621392_201621444_-@UTR3,chr2_201623184_201623236_-@UTR3,chr2_201623490_201623542_-@UTR3,chr2_201623788_201623840_-@UTR3,chr2_201624152_201624204_-@UTR3	0.06583926767769031,0.0007721205253795882,0.08394088484007872,-0.012498931988279005,-0.03659338909956776,-0.0369805990780462,-0.110226359628773	chr2_201624152_201624204_-@UTR3	-0.110226	0.00682135	0.0441554	NA
SLC39A9	0.16459123720853927,0.08054127873592684,0.08401872748463658,0.11080000461415418,0.13341790479803675,0.08613758553274682,0.12187933645045083,0.09044596654567331,0.1281679586298355	0.13105015876239376,0.08363200971401615,0.08631588745110731,0.10581669025361791,0.1631452935041748,0.08467102020439204,0.12990347331078292,0.10515354787939558,0.11031191892011956	0.306749	0.30527	0.273155	0.275303	0.00697222	9	chr14_69458578_69458630_+@UTR3,chr14_69458924_69458976_+@UTR3,chr14_69459456_69459508_+@UTR3,chr14_69459668_69459720_+@UTR3,chr14_69459884_69459936_+@UTR3,chr14_69460070_69460122_+@UTR3,chr14_69460288_69460340_+@UTR3,chr14_69460522_69460574_+@UTR3,chr14_69462238_69462290_+@UTR3	-0.03359388147950093,0.0029789269304496824,0.002188643481759678,-0.0050800296378816084,0.02958460620380593,-0.0015728377955303852,0.007909234910362647,0.014585550280999907,-0.017931424896382706	chr14_69458578_69458630_+@UTR3	-0.0335939	0.00316402	0.0284879	NA
ATG16L2	0.4180695847362514,0.5819304152637487	0.6604575163398693,0.33954248366013073	0.420314	0.661764	0.58354	0.34209	-0.65485	2	chr11_72829532_72829584_+@UTR3,chr11_72842946_72842998_+@UTR3	0.23745284103979752,-0.2219588221762135	chr11_72829532_72829584_+@UTR3	0.237453	0.00258629	0.0256435	NA
NF1	0.3333703091833577,0.13016441730245684,0.09653786416021813,0.21150355933750617,0.15551391653014934,0.07290993348631185	0.28693632107186956,0.15268220437402966,0.1016280852312319,0.18368281561350108,0.15913981491668805,0.11593075879267982	0.408724	0.385923	0.264401	0.28732	0.0828153	6	chr17_31374262_31374314_+@UTR3,chr17_31374610_31374662_+@UTR3,chr17_31375222_31375274_+@UTR3,chr17_31375630_31375682_+@UTR3,chr17_31376294_31376346_+@UTR3,chr17_31376630_31376682_+@UTR3	-0.046477141785951914,0.02225558788238355,0.004860464294367303,-0.027943268268777105,0.0034199302689334465,0.0426983390971325	chr17_31374262_31374314_+@UTR3	-0.0464771	0.000104683	0.00571976	NA
POLR2M	0.13468642543089224,0.30002767930333324,0.3399710431903591,0.22531485207541543	0.18883928115847373,0.20346919615066686,0.3287227058267255,0.2789688168641338	0.387446	0.379145	0.439254	0.448121	0.0312449	4	chr15_57714884_57714936_+@UTR3,chr15_57715776_57715828_+@UTR3,chr15_57716084_57716136_+@UTR3,chr15_57717212_57717264_+@UTR3	0.053439343471918144,-0.09598433058210859,-0.01140390471595304,0.05292108314349708	chr15_57715776_57715828_+@UTR3	-0.0959843	0.00139904	0.0192781	NA
RCC1	0.43709790867513193,0.5112808795726226,0.05162121175224557	0.4267213962891716,0.4531223752810989,0.12015622842972946	0.62616	0.593277	0.305369	0.338168	0.0778242	3	chr1_28538136_28538188_+@UTR3,chr1_28538598_28538650_+@UTR3,chr1_28539054_28539106_+@UTR3	-0.011108171628747332,-0.058639114941261505,0.06709581314364846	chr1_28539054_28539106_+@UTR3	0.0670958	0.000137798	0.00640232	NA
TAF13	0.5743665651825314,0.4256334348174687	0.45583147758181264,0.5441685224181874	0.443819	0.558495	0.58771	0.473034	-0.331573	2	chr1_109062822_109062874_-@UTR3,chr1_109064392_109064444_-@UTR3	-0.11773105442768389,0.11763989163100647	chr1_109062822_109062874_-@UTR3	-0.117731	0.0024349	0.0249268	NA
EDC3	0.16471400939486047,0.41708575112830437,0.4182002394768352	0.2565990617261397,0.39378514086794136,0.34961579740591886	0.459084	0.391013	0.412731	0.462732	0.231544	3	chr15_74630540_74630592_-@UTR3,chr15_74630676_74630728_-@UTR3,chr15_74632510_74632562_-@UTR3	0.09049075456178426,-0.023578914004803553,-0.06848078878828856	chr15_74630540_74630592_-@UTR3	0.0904908	0.0064687	0.0430139	NA
HMGCR	0.23059692595726367,0.3322530254280689,0.12403141769277015,0.10754590792530412,0.09149363927174486,0.11407908372484843	0.24158825552726795,0.33264671213718316,0.1800238757575487,0.0961984119055356,0.06421448075686782,0.08532826391559666	0.430241	0.452524	0.250912	0.22946	-0.0728498	6	chr5_75360390_75360442_+@UTR3,chr5_75360630_75360682_+@UTR3,chr5_75361048_75361100_+@UTR3,chr5_75361244_75361296_+@UTR3,chr5_75361700_75361752_+@UTR3,chr5_75361856_75361908_+@UTR3	0.011194187882614559,0.0005973944622714167,0.05613349971896242,-0.01104626041038094,-0.02692918093751695,-0.028410015132446342	chr5_75361048_75361100_+@UTR3	0.0561335	0.00431595	0.0337803	NA
THY1	0.3549379766771071,0.6450620233228929	0.25105645511139296,0.748943544888607	0.670454	0.766036	0.403506	0.307923	-0.192276	2	chr11_119418152_119418204_-@UTR3,chr11_119418774_119418826_-@UTR3	-0.102617226522014,0.10349259244552322	chr11_119418774_119418826_-@UTR3	0.103493	0.00216219	0.0238532	NA
TSPAN14	0.20251561567968648,0.18001824098474406,0.15587216189947148,0.08038975608849729,0.07106103329700514,0.14514469130961558,0.10631284153793223,0.058685659203047726	0.22326962710356582,0.1766183474600703,0.09332397591453118,0.10102549402393719,0.10558212864803422,0.13814604492549484,0.08878071844548234,0.07325366347888403	0.353693	0.355165	0.242575	0.240861	-0.00599039	8	chr10_80518578_80518630_+@UTR3,chr10_80519548_80519600_+@UTR3,chr10_80519604_80519655_+@UTR3,chr10_80519748_80519800_+@UTR3,chr10_80519942_80519994_+@UTR3,chr10_80521046_80521098_+@UTR3,chr10_80521706_80521758_+@UTR3,chr10_80522538_80522590_+@UTR3	0.020871443991842153,-0.003169805757017863,-0.06209479379273457,0.020806621122004834,0.03463524868099124,-0.0067409272042600055,-0.017227494120009637,0.014754085208595794	chr10_80519604_80519655_+@UTR3	-0.0620948	0.000953033	0.0166366	NA
AC010326.3	0.5485089223917426,0.4514910776082573	0.3634150873281308,0.6365849126718692	0.475602	0.652221	0.568178	0.391558	-0.455607	2	chr19_57907348_57907400_-@UTR3,chr19_57908456_57908508_-@UTR3	-0.18130838189101234,0.18254032735545317	chr19_57908456_57908508_-@UTR3	0.18254	3.63e-05	0.00324138	NA
ROR1	0.2756451302507042,0.14362042722930773,0.16488392029251736,0.15428366486467573,0.261566857362795	0.1943800980802878,0.21060359627722058,0.21031095722746576,0.23490803946211916,0.1497973089529067	0.279873	0.200037	0.362669	0.402804	0.484509	5	chr1_64142644_64142696_+@UTR3,chr1_64178930_64178982_+@UTR3,chr1_64179020_64179071_+@UTR3,chr1_64179162_64179214_+@UTR3,chr1_64179296_64179348_+@UTR3	-0.08421544244327481,0.06143706362277568,0.04019656917966141,0.07472317703557296,-0.11448735703225532	chr1_64179296_64179348_+@UTR3	-0.114487	0.0068547	0.0442412	NA
SPIN1	0.10874017813119463,0.07654433778038083,0.151330506363877,0.10488552685116367,0.12763056547210302,0.10723550551603643,0.09798914050895488,0.08884827398357664,0.06328585552669241,0.07351010986602034	0.10096302274672485,0.06513680907498301,0.15720827245817778,0.12211888524617463,0.11050711473791995,0.1167149459845442,0.0981929978584664,0.08452601400648699,0.06667358979410097,0.07795834809242115	0.289791	0.285133	0.238182	0.242979	0.0233768	10	chr9_88475274_88475326_+@UTR3,chr9_88475604_88475656_+@UTR3,chr9_88475864_88475916_+@UTR3,chr9_88476036_88476088_+@UTR3,chr9_88476208_88476260_+@UTR3,chr9_88477302_88477354_+@UTR3,chr9_88477456_88477508_+@UTR3,chr9_88477772_88477824_+@UTR3,chr9_88477950_88478002_+@UTR3,chr9_88478358_88478410_+@UTR3	-0.007668802439027386,-0.011291990343597291,0.005974043611077895,0.017325622001685803,-0.017009457028497085,0.00957636070630645,0.00030847522179673625,-0.00421233606102453,0.0034951976323138456,0.004553220483777876	chr9_88476036_88476088_+@UTR3	0.0173256	0.000207664	0.00781388	NA
SORT1	0.147918802726962,0.0635916392351555,0.17743915600885005,0.12994441746263016,0.22609186408360762,0.12889212670659977,0.12612199377619485	0.13709160794362588,0.09493558260374403,0.18176783045056588,0.05564897857498754,0.21318465727098013,0.16290527795572637,0.15446606520037012	0.346932	0.347686	0.249979	0.248994	-0.00313071	7	chr1_109309662_109309714_-@UTR3,chr1_109310106_109310158_-@UTR3,chr1_109312292_109312344_-@UTR3,chr1_109312770_109312822_-@UTR3,chr1_109313224_109313276_-@UTR3,chr1_109313690_109313742_-@UTR3,chr1_109313920_109313972_-@UTR3	-0.010695029423734181,0.03128264542810209,0.004383529055318025,-0.0739237950308699,-0.012812767716420481,0.03398838960859821,0.028294383864323674	chr1_109312770_109312822_-@UTR3	-0.0739238	0.000350184	0.009858	NA
DTL	0.19937336945615092,0.20050973309251455,0.2833423640377282,0.2005117399157134,0.11626279349789281	0.18225180528431986,0.11571801169317646,0.3628225975864994,0.24239481025603785,0.09681277517996652	0.353909	0.306522	0.356974	0.398432	0.207387	5	chr1_212103162_212103214_+@UTR3,chr1_212103400_212103452_+@UTR3,chr1_212104446_212104498_+@UTR3,chr1_212104578_212104630_+@UTR3,chr1_212104812_212104864_+@UTR3	-0.017112656829611245,-0.0841051279822173,0.07893407908490108,0.04155147104895071,-0.019317844946994372	chr1_212103400_212103452_+@UTR3	-0.0841051	0.000609353	0.0133432	NA
TMEM97	0.24084273384475466,0.22729706488407184,0.33487628555363,0.0899198847705696,0.10706403094697382	0.2575116588557464,0.20569563485850834,0.27844039060154196,0.13997782649114268,0.11837448919306055	0.428376	0.42329	0.330143	0.334572	0.0172313	5	chr17_28326848_28326900_+@UTR3,chr17_28327536_28327588_+@UTR3,chr17_28327922_28327974_+@UTR3,chr17_28328192_28328244_+@UTR3,chr17_28328614_28328666_+@UTR3	0.01668643570183731,-0.021495449362067015,-0.05623945662639007,0.050001353460086134,0.011355058791327421	chr17_28327922_28327974_+@UTR3	-0.0562395	0.00115656	0.0177317	NA
TMEM123	0.04081425848246534,0.06357511001319252,0.20754787191440413,0.2520168487923091,0.19694707359552718,0.2390988372021017	0.04903288672398145,0.06870805453141389,0.19390476636945767,0.23356817334948576,0.21583072941341705,0.23895538961224413	0.401644	0.403383	0.295616	0.294401	-0.00623353	6	chr11_102396440_102396492_-@UTR3,chr11_102396596_102396648_-@UTR3,chr11_102396934_102396986_-@UTR3,chr11_102397234_102397286_-@UTR3,chr11_102397824_102397876_-@UTR3,chr11_102398806_102398858_-@UTR3	0.008161908145395844,0.005078672111021615,-0.013684281462103765,-0.018485934903688273,0.01883231176714706,-0.00018713581186594053	chr11_102397824_102397876_-@UTR3	0.0188323	0.000772309	0.0150881	NA
ZNF623	0.2944099378881988,0.1816597653554175,0.16240510697032437,0.13358638141246837,0.1583563377041638,0.06958247066942719	0.29434808612440194,0.16249003189792666,0.25532296650717706,0.07187001594896332,0.13674242424242425,0.07922647527910687	0.407024	0.423941	0.270987	0.256808	-0.0587495	6	chr8_143651472_143651524_+@UTR3,chr8_143652350_143652402_+@UTR3,chr8_143652784_143652836_+@UTR3,chr8_143653832_143653884_+@UTR3,chr8_143654442_143654494_+@UTR3,chr8_143654592_143654644_+@UTR3	-2.7975260815216174e-05,-0.019058076895514142,0.09243521852524886,-0.06136320818450573,-0.02148347002632045,0.009606488294046131	chr8_143652784_143652836_+@UTR3	0.0924352	8.53e-05	0.00490518	NA
DLG1	0.1500036502091156,0.14720540742731003,0.22175283794350978,0.4810381044200646	0.12960865982515316,0.1417522429846246,0.2982240259315357,0.4304150712586865	0.546683	0.544996	0.27406	0.275774	0.0044568	4	chr3_197043052_197043104_-@UTR3,chr3_197043616_197043668_-@UTR3,chr3_197044066_197044118_-@UTR3,chr3_197044590_197044642_-@UTR3	-0.0200800261510847,-0.005263207208671711,0.07623778814730073,-0.05024680028541528	chr3_197044066_197044118_-@UTR3	0.0762378	0.00601828	0.0414124	NA
NEK4	0.10721199048725183,0.07192633150821305,0.0855317736850838,0.27808196449311434,0.4572479398263371	0.1663690476190476,0.12058767951625093,0.0547099395313681,0.26412509448223737,0.39420823885109596	0.495373	0.450313	0.181711	0.245945	0.137588	5	chr3_52709958_52710010_-@UTR3,chr3_52710808_52710860_-@UTR3,chr3_52711354_52711406_-@UTR3,chr3_52711542_52711594_-@UTR3,chr3_52711704_52711756_-@UTR3	0.057907298543605004,0.047500641991007855,-0.031156895429416187,-0.014246856928190887,-0.06288241871679712	chr3_52711704_52711756_-@UTR3	-0.0628824	0.00738543	0.0460272	NA
C5orf24	0.20440810018231512,0.24278204004703915,0.11216999180143576,0.10999556591946098,0.14967560265946003,0.09614316590485235,0.08482553348543669	0.20530699575617384,0.1984827408327793,0.10100072501118436,0.12372478230989313,0.146094909027074,0.11699239879516173,0.10839744826773373	0.387687	0.367624	0.223952	0.249607	0.0766591	7	chr5_134855542_134855594_+@UTR3,chr5_134855682_134855734_+@UTR3,chr5_134856660_134856712_+@UTR3,chr5_134856924_134856976_+@UTR3,chr5_134857612_134857664_+@UTR3,chr5_134858406_134858458_+@UTR3,chr5_134859590_134859642_+@UTR3	0.000917179178237304,-0.044210703103837595,-0.01113102781655935,0.013731270632807754,-0.0035554965774452496,0.020835247685834613,0.02356300776209054	chr5_134855682_134855734_+@UTR3	-0.0442107	0.00139309	0.0192515	NA
KLHL20	0.33992303992303996,0.1195804195804196,0.20552780552780553,0.07025567025567026,0.16315536315536316,0.10155770155770157	0.25532315637578795,0.18707982076403123,0.18650565808460545,0.14686413002202472,0.14402065770486822,0.0802065770486823	0.419859	0.411468	0.275266	0.283488	0.0291271	6	chr1_173785208_173785260_+@UTR3,chr1_173785410_173785462_+@UTR3,chr1_173785666_173785718_+@UTR3,chr1_173785816_173785868_+@UTR3,chr1_173786044_173786096_+@UTR3,chr1_173786236_173786288_+@UTR3	-0.08401271569412555,0.06631757057830351,-0.0190758973675057,0.07537985256657341,-0.01929920268149035,-0.021372932239082043	chr1_173785208_173785260_+@UTR3	-0.0840127	0.00510603	0.0372731	NA
LYRM7	0.10759537733221942,0.08116355704075003,0.14598997493734334,0.22530864197530864,0.10794346978557505,0.16728163000092824,0.09801123178316162,0.06670611714471364	0.04049362637901146,0.14119285639904197,0.12809109898254833,0.27586967308010363,0.10776963081390006,0.19256926450680242,0.08629503035203459,0.02771881948655751	0.335433	0.348362	0.217487	0.198101	-0.0545649	8	chr5_131199846_131199898_+@UTR3,chr5_131200012_131200064_+@UTR3,chr5_131200194_131200246_+@UTR3,chr5_131200376_131200428_+@UTR3,chr5_131201404_131201456_+@UTR3,chr5_131202952_131203004_+@UTR3,chr5_131203774_131203826_+@UTR3,chr5_131205276_131205328_+@UTR3	-0.06776408176868107,0.05843774883476986,-0.018844722979963063,0.049247455011727004,-0.0012620496956769617,0.024018412798689354,-0.01285213482982897,-0.039942614601393554	chr5_131199846_131199898_+@UTR3	-0.0677641	0.0020171	0.0227371	NA
NAV1	0.2777067348678602,0.20645069622051723,0.37961778914464334,0.13622477976697925	0.4989264626945786,0.238593666129898,0.0848094471282877,0.17767042404723563	0.406993	0.553033	0.398874	0.290592	-0.442362	4	chr1_201820724_201820776_+@UTR3,chr1_201823306_201823358_+@UTR3,chr1_201823464_201823516_+@UTR3,chr1_201824340_201824392_+@UTR3	0.2078571428571428,0.022644376899696034,-0.2928301249577846,0.03035798716649782	chr1_201823464_201823516_+@UTR3	-0.29283	0.000303387	0.00916227	NA
EPC1	0.16278819219995688,0.3104281339575457,0.5267836738424975	0.28595744680851065,0.29404255319148936,0.42	0.559028	0.452721	0.334148	0.413403	0.304299	3	chr10_32267724_32267776_-@UTR3,chr10_32268098_32268150_-@UTR3,chr10_32271634_32271686_-@UTR3	0.12986351665196683,-0.00811728700841119,-0.09759942218712075	chr10_32267724_32267776_-@UTR3	0.129864	0.00622923	0.0421564	NA
NCK1	0.6941589811155029,0.12627482555018785,0.08590250329380765,0.09366369004050164	0.6203538937698974,0.12352286047162227,0.14038358706314383,0.11573965869533655	0.60589	0.565619	0.153739	0.199998	0.0992238	4	chr3_136948500_136948552_+@UTR3,chr3_136948728_136948780_+@UTR3,chr3_136949794_136949846_+@UTR3,chr3_136950484_136950536_+@UTR3	-0.07340927879308279,-0.003280098120225672,0.05342804389929259,0.02132791366406643	chr3_136948500_136948552_+@UTR3	-0.0734093	0.00806821	0.0482097	NA
RAB8B	0.2983812875407575,0.17997320710638243,0.13226639137813836,0.11385627213782729,0.06089883494672502,0.10336691395890864,0.11125709293126092	0.2542026189811883,0.19581624086306923,0.1828661810394233,0.11927633968519692,0.048005294581184216,0.08048145938276073,0.11935186546717742	0.370634	0.341633	0.280006	0.294102	0.117547	7	chr15_63256520_63256572_+@UTR3,chr15_63263818_63263870_+@UTR3,chr15_63264032_63264084_+@UTR3,chr15_63264388_63264440_+@UTR3,chr15_63265328_63265380_+@UTR3,chr15_63265684_63265736_+@UTR3,chr15_63265922_63265974_+@UTR3	-0.0442428148613036,0.015521264107533683,0.050115736576818726,0.005110380538766723,-0.013155953108842669,-0.02309268990408439,0.007768100691208632	chr15_63264032_63264084_+@UTR3	0.0501157	0.00233091	0.0245657	NA
MAP3K2	0.07460214558825597,0.060027504647269435,0.09597516748945624,0.07798849545962526,0.10546760549687484,0.12864185465962916,0.1160567046350134,0.14959742287053235,0.11053621045904587,0.08110688869429757	0.0884362504344964,0.06614774068001779,0.0825317031947856,0.0691828556800975,0.13116037404847194,0.14225826223929336,0.11101623001596433,0.09786396092734957,0.1267661280166744,0.08463649476284925	0.303872	0.297303	0.217513	0.226049	0.0315308	10	chr2_127301004_127301056_-@UTR3,chr2_127301606_127301658_-@UTR3,chr2_127303706_127303758_-@UTR3,chr2_127304318_127304370_-@UTR3,chr2_127304998_127305050_-@UTR3,chr2_127305734_127305786_-@UTR3,chr2_127305904_127305956_-@UTR3,chr2_127306606_127306658_-@UTR3,chr2_127306888_127306940_-@UTR3,chr2_127307436_127307488_-@UTR3	0.013890010601049801,0.006205633975347992,-0.01333133635074435,-0.008702411451880887,0.025721827715489004,0.01365664165863223,-0.00493634850873878,-0.05153657030961789,0.0162732143195186,0.003608299178820093	chr2_127306606_127306658_-@UTR3	-0.0515366	0.00143095	0.0194588	NA
SIN3A	0.11281832242866664,0.7605406384892669,0.0505478219788896,0.07609321710317692	0.16106318116129795,0.6641479531177268,0.12184602863507754,0.0529428370858977	0.108114	0.139432	0.610293	0.578643	-0.367013	4	chr15_75369356_75369408_-@UTR3,chr15_75371108_75371160_-@UTR3,chr15_75421680_75421732_-@UTR3,chr15_75422340_75422392_-@UTR3	0.04958842697242406,-0.09479869614140701,0.07243548478477232,-0.020952104364599808	chr15_75371108_75371160_-@UTR3	-0.0947987	0.00614615	0.0418126	NA
CDC42BPG	0.11574074074074074,0.8842592592592592	0.3655844155844156,0.6344155844155844	0.889914	0.656845	0.172995	0.406064	0.438113	2	chr11_64823438_64823490_-@UTR3,chr11_64824184_64824236_-@UTR3	0.203700566744045,-0.24522031913336273	chr11_64824184_64824236_-@UTR3	-0.24522	0.000512124	0.0120693	NA
KDELR1	0.1261633752439245,0.8738366247560755	0.16363117032220595,0.8363688296777941	0.88198	0.84835	0.210886	0.244516	0.0560867	2	chr19_48382548_48382600_-@UTR3,chr19_48383026_48383078_-@UTR3	0.036801864804459655,-0.037488680033257005	chr19_48383026_48383078_-@UTR3	-0.0374887	0.00103562	0.0169531	NA
DYRK3	0.19449427671115527,0.10992149827601562,0.17913109491032314,0.0824448346204902,0.11009326055701872,0.10772569775776006,0.07783906086322209,0.13835027630401503	0.22095298535089106,0.1591742027605902,0.1379032471309958,0.08303255063726266,0.08017346237241524,0.10709516632291499,0.10862750542069913,0.10304088000423077	0.331532	0.345841	0.265294	0.249495	-0.0609614	8	chr1_206649018_206649070_+@UTR3,chr1_206649634_206649686_+@UTR3,chr1_206649852_206649904_+@UTR3,chr1_206650000_206650052_+@UTR3,chr1_206650702_206650754_+@UTR3,chr1_206650992_206651044_+@UTR3,chr1_206651816_206651868_+@UTR3,chr1_206652290_206652342_+@UTR3	0.02377349812093893,0.046290303483880565,-0.043403277296040765,-0.002180732282068776,-0.032468772827326464,-0.0033259377946866786,0.0278165375448388,-0.037718614360619934	chr1_206649634_206649686_+@UTR3	0.0462903	0.00427512	0.0334984	NA
VPS35	0.04837169783022183,0.052973675144578396,0.10377994787571104,0.17661162898553054,0.26010983518216246,0.3581532149817958	0.07910077238227092,0.12314758049075057,0.13581419560798869,0.14133880616432976,0.22229265776579868,0.2983059875888614	0.482095	0.423815	0.159992	0.224537	0.185883	6	chr16_46658428_46658480_-@UTR3,chr16_46658576_46658628_-@UTR3,chr16_46659368_46659420_-@UTR3,chr16_46659762_46659814_-@UTR3,chr16_46660112_46660164_-@UTR3,chr16_46660254_46660306_-@UTR3	0.030167540942783608,0.06951440449164817,0.03149708794960436,-0.03560569468066099,-0.03810956086853409,-0.060035439332164986	chr16_46658576_46658628_-@UTR3	0.0695144	1.74e-07	0.000157821	NA
RAB3IP	0.2472933081140214,0.09545864492127316,0.15069582753998975,0.14666658315901113,0.11564766449964302,0.05861611113198803,0.10734491584516011,0.07827694478891353	0.23963967531928698,0.0910571359600486,0.10155041829799112,0.12728479718770982,0.09335702054148658,0.0768768717797844,0.09734292137204759,0.172891159541645	0.35309	0.31466	0.211438	0.258499	0.166241	8	chr12_69815576_69815628_+@UTR3,chr12_69816034_69816086_+@UTR3,chr12_69816666_69816718_+@UTR3,chr12_69816956_69817008_+@UTR3,chr12_69817088_69817140_+@UTR3,chr12_69818812_69818864_+@UTR3,chr12_69820470_69820522_+@UTR3,chr12_69820848_69820899_+@UTR3	-0.007794368532988594,-0.004447552553084502,-0.04875010204279537,-0.01928124089773986,-0.022197278090179864,0.01791961824932943,-0.009966737329108827,0.09345025486185753	chr12_69820848_69820899_+@UTR3	0.0934503	0.00222145	0.0239592	NA
RPS6KA2	0.09493328473280756,0.38862217509443964,0.5164445401727528	0.023007590132827323,0.4365411205742612,0.5404512892929115	0.640043	0.690879	0.0955843	0.0237272	-0.110264	3	chr6_166411160_166411212_-@UTR3,chr6_166585878_166585930_-@UTR3,chr6_166586050_166586102_-@UTR3	-0.07089839543549088,0.04805631200825494,0.02414504648666682	chr6_166411160_166411212_-@UTR3	-0.0708984	0.00230793	0.0244918	NA
RNF167	0.7909393638449842,0.2090606361550158	0.730198760336081,0.26980123966391895	0.817774	0.772487	0.383934	0.429221	0.0821921	2	chr17_4945022_4945074_+@UTR3,chr17_4945192_4945244_+@UTR3	-0.060499973077152935,0.06069669945452158	chr17_4945192_4945244_+@UTR3	0.0606967	0.0011533	0.0177317	NA
MAVS	0.15616485470879105,0.1301268879841302,0.0815838521173229,0.13115619349182048,0.1682411914052604,0.1751445254247944,0.07779306846879118,0.07978942639908942	0.13116260479790443,0.11729254370288338,0.0589386695122604,0.12876963241112357,0.18343879351624126,0.21120517964946087,0.06950992481696348,0.09968265159316263	0.275064	0.246707	0.294432	0.314388	0.156971	8	chr20_3866184_3866236_+@UTR3,chr20_3867298_3867350_+@UTR3,chr20_3870650_3870702_+@UTR3,chr20_3871876_3871928_+@UTR3,chr20_3872680_3872732_+@UTR3,chr20_3873754_3873806_+@UTR3,chr20_3874206_3874258_+@UTR3,chr20_3874374_3874426_+@UTR3	-0.024958739647124972,-0.012808356831144146,-0.02260275891422385,-0.002378826231716813,0.015182018638697031,0.03601045629073432,-0.008260102336025296,0.019866607300443553	chr20_3873754_3873806_+@UTR3	0.0360105	0.00126991	0.0182957	NA
NAP1L1	0.09236773094571671,0.1366276062325363,0.13852699676739408,0.10500093258490983,0.08883513474544735,0.10957429335487302,0.13324959992184773,0.055946229067424,0.1398714763798508	0.1036041768651433,0.1357022719301054,0.14112703850860034,0.1059593860017604,0.10087933270892552,0.10943787964527191,0.13381337761208292,0.06588177991243267,0.10359475681567758	0.252787	0.230489	0.306282	0.318402	0.133227	9	chr12_76046666_76046718_-@UTR3,chr12_76046798_76046850_-@UTR3,chr12_76047048_76047100_-@UTR3,chr12_76047208_76047260_-@UTR3,chr12_76047344_76047395_-@UTR3,chr12_76047402_76047454_-@UTR3,chr12_76047756_76047808_-@UTR3,chr12_76048094_76048146_-@UTR3,chr12_76049690_76049742_-@UTR3	0.011166194739430299,-0.0009878920441885874,0.002535577492281227,0.0008928768093347944,0.011973758857327696,-0.00020113268834029419,0.0005002660832237604,0.009863331522095002,-0.03632602629346009	chr12_76049690_76049742_-@UTR3	-0.036326	0.00131533	0.0186931	NA
AAK1	0.08877216687046088,0.0915385283057961,0.11478644006510214,0.08045519507245995,0.0615817790774742,0.050886294829226845,0.10712323370016291,0.07128269557144576,0.06005562242032326,0.056473004166681655,0.12783654144222303,0.0892084984786432	0.07821108912143221,0.0712254714567603,0.08613095050021548,0.07848917689085942,0.07101147135551865,0.059357281283035544,0.1015888559087254,0.07869660480146269,0.060412626169796,0.08257921102515543,0.1381526172089714,0.09414464427806742	0.252426	0.268393	0.24933	0.232103	-0.0884875	12	chr2_69458612_69458664_-@UTR3,chr2_69459790_69459842_-@UTR3,chr2_69460184_69460236_-@UTR3,chr2_69460990_69461042_-@UTR3,chr2_69461500_69461552_-@UTR3,chr2_69461926_69461978_-@UTR3,chr2_69462856_69462908_-@UTR3,chr2_69463034_69463086_-@UTR3,chr2_69463306_69463358_-@UTR3,chr2_69463984_69464036_-@UTR3,chr2_69464524_69464576_-@UTR3,chr2_69465392_69465444_-@UTR3	-0.01036263917083892,-0.020105166323601473,-0.02844538947634645,-0.0017731697098772314,0.009617955842940965,0.008660928851546124,-0.005342963053697469,0.007602240883793368,0.000552694445971523,0.02627956759264289,0.010487837124750349,0.005119834178915095	chr2_69460184_69460236_-@UTR3	-0.0284454	4.29e-06	0.00100385	NA
ZMYM3	0.5754689754689754,0.42453102453102454	0.8193222548061257,0.18067774519387422	0.427597	0.185049	0.577727	0.820275	1.20834	2	chrX_71239632_71239684_-@UTR3,chrX_71249320_71249372_-@UTR3	0.23669952210274792,-0.23812275985663084	chrX_71249320_71249372_-@UTR3	-0.238123	8.88e-06	0.00156962	NA
CD44	0.2316748043125272,0.22252850188462367,0.15516709380454144,0.12084212612713265,0.12894596588560128,0.08550515491487708,0.05533635307069659	0.2252368068714441,0.21161854278092143,0.14168906122316655,0.13107946977765225,0.13350931239602645,0.08970695554665997,0.06715985140412936	0.395584	0.383388	0.201699	0.214589	0.0451775	7	chr11_35229378_35229430_+@UTR3,chr11_35229444_35229495_+@UTR3,chr11_35229874_35229926_+@UTR3,chr11_35230806_35230858_+@UTR3,chr11_35231488_35231540_+@UTR3,chr11_35232114_35232166_+@UTR3,chr11_35232296_35232348_+@UTR3	-0.006464532025479697,-0.010936329403611028,-0.013506537541160935,0.010205094454117672,0.004531985058327581,0.004168985896090549,0.011788815194505378	chr11_35229874_35229926_+@UTR3	-0.0135065	0.00535045	0.0384637	NA
HP1BP3	0.16584501037156843,0.1452409831947343,0.22182931336574638,0.3724726110293078,0.09461208203864319	0.14258107203688067,0.12293769729348204,0.22595302522081717,0.39127960552211644,0.11724859992670382	0.123072	0.146669	0.448465	0.43639	-0.25306	5	chr1_20742752_20742804_-@UTR3,chr1_20742990_20743042_-@UTR3,chr1_20743310_20743362_-@UTR3,chr1_20744754_20744806_-@UTR3,chr1_20775814_20775866_-@UTR3	-0.023356222334585452,-0.022395736479993447,0.00401283341088246,0.01869681588658334,0.022485820612536636	chr1_20742752_20742804_-@UTR3	-0.0233562	0.00811541	0.0484119	NA
BRD4	0.03929885759867688,0.137592518706084,0.41074601517503323,0.16682663337234344,0.05667481543101863,0.09851329237606164,0.09034786734078207	0.06302700922266138,0.16055665349143605,0.4120059288537549,0.16194005270092224,0.05021409749670618,0.06308465085638996,0.08917160737812911	0.2085	0.184779	0.368879	0.390568	0.174249	7	chr19_15235594_15235646_-@UTR3,chr19_15236814_15236866_-@UTR3,chr19_15237634_15237686_-@UTR3,chr19_15238352_15238404_-@UTR3,chr19_15247068_15247120_-@UTR3,chr19_15248540_15248592_-@UTR3,chr19_15249206_15249258_-@UTR3	0.023757382826702617,0.022990218984814792,0.0013170960671641807,-0.004804026796273758,-0.006356515968438975,-0.03526208651733276,-0.001086221404316176	chr19_15248540_15248592_-@UTR3	-0.0352621	0.00120298	0.0179193	NA
XRCC2	0.11375772226698899,0.08138418837854777,0.11185782075387234,0.13808935446324647,0.15176291521174679,0.20671501477303247,0.19643298415256513	0.06148120512005601,0.12341610358026227,0.15255611288443024,0.14268540397131368,0.13657321044461948,0.2672852556573487,0.11600270834196962	0.372527	0.366499	0.281944	0.287896	0.0235371	7	chr7_152643016_152643068_-@UTR3-EX,chr7_152644762_152644814_-@UTR3,chr7_152644978_152645030_-@UTR3,chr7_152645140_152645192_-@UTR3,chr7_152645686_152645738_-@UTR3,chr7_152646862_152646914_-@UTR3,chr7_152648016_152648068_-@UTR3	-0.05275814013141128,0.04083675466379334,0.03930874882402584,0.00402018221018402,-0.01576925443986818,0.0591557207984266,-0.08050591568439373	chr7_152648016_152648068_-@UTR3	-0.0805059	0.00531331	0.0382812	NA
CACNG8	0.2377619651325493,0.20423976423732415,0.07632727172298161,0.09707499881239684,0.17920434967262835,0.14936139611780438,0.05603025430431536	0.19796507085155132,0.18747940872042554,0.07838524271066076,0.0835353904777353,0.2096771382209901,0.1813481378985949,0.061609611120042075	0.361045	0.328368	0.265768	0.295425	0.136865	7	chr19_53983628_53983680_+@UTR3,chr19_53984786_53984838_+@UTR3,chr19_53986398_53986450_+@UTR3,chr19_53986566_53986618_+@UTR3,chr19_53988946_53988998_+@UTR3,chr19_53989490_53989542_+@UTR3,chr19_53990180_53990232_+@UTR3	-0.039705846782571275,-0.0167128476221432,0.0020662029839128015,-0.013497029874610059,0.030423117365575125,0.03194122106524555,0.005588646790606229	chr19_53983628_53983680_+@UTR3	-0.0397058	0.000808412	0.0153789	NA
AC007842.1	0.0595000180346516,0.10526360019516993,0.4340101548599129,0.10029060540170844,0.10088973529513535,0.05974650415023861,0.06912980580888733,0.07116957625429556	0.04297065886763933,0.08538987135789979,0.44553968506011143,0.13226238261762244,0.1443341961992051,0.02917840644306009,0.060932978339727904,0.05939182111473409	0.244483	0.23361	0.325526	0.337381	0.0656319	8	chr19_39959358_39959410_-@UTR3-EX,chr19_39970222_39970274_-@UTR3-EX,chr19_39982324_39982376_-@UTR3-EX,chr19_39983652_39983704_-@UTR3-EX,chr19_39983876_39983928_-@UTR3-EX,chr19_40021498_40021550_-@UTR3-EX,chr19_40022512_40022564_-@UTR3-EX,chr19_40022952_40023004_-@UTR3-EX	-0.016323503104483543,-0.01966907783664705,0.011612407235784772,0.032088116858447174,0.043532354193031725,-0.030335314140102765,-0.008008178265957289,-0.011580529596744223	chr19_39983876_39983928_-@UTR3-EX	0.0435324	0.000110708	0.00587056	NA
RALA	0.13046328959149567,0.10997603095126741,0.23804441122771292,0.21015672475576963,0.1990344611350272,0.11232508233872716	0.14683447174345413,0.0989616759762294,0.1863500621200879,0.24923172028802934,0.19338756944195853,0.12523450043024073	0.36351	0.358238	0.328766	0.335376	0.0210791	6	chr7_39706274_39706326_+@UTR3,chr7_39706580_39706632_+@UTR3,chr7_39706830_39706882_+@UTR3,chr7_39707066_39707118_+@UTR3,chr7_39707348_39707400_+@UTR3,chr7_39708082_39708134_+@UTR3	0.016330984643480234,-0.010964976216934444,-0.05152579469378976,0.038958561259734764,-0.005627032115892883,0.012866428323906692	chr7_39706830_39706882_+@UTR3	-0.0515258	0.00601485	0.0414124	NA
NFE2L2	0.03434206281358727,0.049274112342316996,0.2079384718105027,0.658669826934768,0.049775526098825	0.080906033911149,0.0694562849294307,0.16576678980771054,0.6055224021975939,0.07834848915411574	0.464091	0.44284	0.265773	0.288578	0.0676234	5	chr2_177225126_177225178_-@UTR3-EX,chr2_177227368_177227420_-@UTR3-EX,chr2_177230420_177230472_-@UTR3,chr2_177230604_177230656_-@UTR3,chr2_177233102_177233154_-@UTR3	0.046639712503110796,0.02044643111934792,-0.04158969158823056,-0.05263039600447472,0.028769210904336318	chr2_177230604_177230656_-@UTR3	-0.0526304	0.00536048	0.0384637	NA
RRP7A	0.11633133372263808,0.6079037709472492,0.2757648953301128	0.17479668125829925,0.46447340890349426,0.3607299098382066	0.577429	0.566996	0.317246	0.329278	0.0263057	3	chr22_42510906_42510958_-@UTR3,chr22_42511762_42511814_-@UTR3,chr22_42512156_42512208_-@UTR3	0.06024533544064445,-0.14047811030374074,0.08582442702670695	chr22_42511762_42511814_-@UTR3	-0.140478	0.000325827	0.00963455	NA
RCL1	0.6073232323232324,0.27070707070707073,0.12196969696969699	0.4061303664205633,0.3575676784249384,0.23630195515449823	0.672948	0.535134	0.296758	0.423569	0.330596	3	chr9_4860406_4860458_+@UTR3,chr9_4860710_4860762_+@UTR3,chr9_4860904_4860956_+@UTR3	-0.20002962354499348,0.07951370120646761,0.10471334631046467	chr9_4860406_4860458_+@UTR3	-0.20003	0.000566712	0.012796	NA
CEPT1	0.2053514739229025,0.4605668934240363,0.31727891156462584,0.016802721088435377	0.2336935841640262,0.37060808690490926,0.31632676848370084,0.07937156044736375	0.554026	0.522681	0.195348	0.240071	0.0840244	4	chr1_111184388_111184440_+@UTR3,chr1_111184528_111184580_+@UTR3,chr1_111184670_111184722_+@UTR3,chr1_111185410_111185462_+@UTR3-EX	0.02674284995413334,-0.09017517018637888,-0.0020926204468143528,0.060366052491963196	chr1_111184528_111184580_+@UTR3	-0.0901752	0.00247089	0.0251531	NA
[truncated: 522 more rows]

## Sheet: PolyAminer_JTE_Pval_sig
Gene	Vector_a	Vector_b	CP	TP	CD	TD	PolyAIndex	No.PAsites	PolyASites	DeltaU	MaxPASite	MaxDeltaU	G_Pval	AdjG_Pval	Symbol
[truncated: 2,418 more rows]
