# Supplementary material
Source: HighWire-hosted journal article supplement (doi:10.1101/rna.079931.123)
Supplement: Supplemetal_Dataset_S2.xlsx [file Supplemetal_Dataset_S2.xlsx]

## Sheet: Dataset S2
Location	Strand	BBLS	BLS	NLOD	Z_Score	FDR	Motif_ID	TF_Name	Gene	Distance_bp	Region
chr6:26018143..26018149	+	1.678	2.594	1	3.93	0.019	M01287	Neuro D	HIST1H1A	-103	Upstream
chr6:26018143..26018149	-	1.678	2.594	1	3.93	0.019	M01287	Neuro D	HIST1H1A	-109	Upstream
chr6:26018142..26018149	-	2.045	2.594	1	4.07	0.022	M00644	LBP-1	HIST1H1A	-109	Upstream
chr6:26018058..26018074	-	0.373	2.509	0.882	4.351	0.09	M00287	NF-Y	HIST1H1A	-34	Upstream
chr6:27835846..27835852	+	2.843	4.521	1	3.93	0.007	M01287	Neuro D	HIST1H1B	-487	Upstream
chr6:27835846..27835852	-	2.843	4.521	1	3.93	0.007	M01287	Neuro D	HIST1H1B	-493	Upstream
chr6:27835408..27835424	-	0.722	3.605	0.896	4.47	0.054	M00287	NF-Y	HIST1H1B	-65	Upstream
chr6:26056744..26056760	-	1.371	4.205	0.897	4.478	0.017	M00287	NF-Y	HIST1H1C	-61	Upstream
chr6:26056735..26056745	+	1.937	3.972	0.905	4.786	0.039	M00652	Nrf-1	HIST1H1C	-36	Upstream
chr6:26056733..26056743	-	1.921	3.972	0.84	4.278	0.031	M00652	Nrf-1	HIST1H1C	-44	Upstream
chr6:26235433..26235441	-	1.879	3.929	1	4.145	0.091	M01308	SOX4	HIST1H1D	-225	Upstream
chr6:26235425..26235431	-	3.166	3.929	1	3.663	0	M00704	TEF-1	HIST1H1D	-215	Upstream
chr6:26235259..26235275	-	0.626	3.306	0.877	4.301	0.061	M00287	NF-Y	HIST1H1D	-59	Upstream
chr6:26155842..26155850	+	3.666	4.541	1	4.022	0.099	M00658	PU.1	HIST1H1E	-716	Upstream
chr6:26156497..26156513	+	1.013	4.013	0.89	4.422	0.03	M00287	NF-Y	HIST1H1E	-61	Upstream
chr6:26108406..26108422	-	0.519	3.747	0.882	4.347	0.075	M00287	NF-Y	HIST1H1T	-58	Upstream
chr6:25727585..25727591	+	1.583	3.131	1	3.93	0.021	M01287	Neuro D	HIST1H2AA	-795	Upstream
chr6:25727585..25727591	-	1.583	3.131	1	3.93	0.021	M01287	Neuro D	HIST1H2AA	-801	Upstream
chr6:25726897..25726910	+	1.83	3.017	0.949	4.977	0.035	M00210	OCT-x	HIST1H2AA	-107	Upstream
chr6:25726896..25726912	-	1.661	3.149	0.934	4.793	0.097	M01368	45201	HIST1H2AA	-122	Upstream
chr6:25726857..25726863	-	2.648	3.454	1	3.962	0.032	MA0095	YY1	HIST1H2AA	-73	Upstream
chr6:25726847..25726858	-	1.826	2.907	0.952	5.102	0.013	M00687	alpha-CP1	HIST1H2AA	-68	Upstream
chr6:25726844..25726860	-	1.236	2.909	0.919	4.679	0.02	M00287	NF-Y	HIST1H2AA	-70	Upstream
chr6:26033954..26033965	+	2.658	3.334	0.967	4.43	0.059	M00795	Octamer	HIST1H2AB	-158	Upstream
chr6:26033953..26033966	+	2.47	3.793	0.926	4.788	0.049	M00210	OCT-x	HIST1H2AB	-157	Upstream
chr6:26033952..26033968	-	2.373	3.805	0.898	4.583	0.1	M01476	POU2F3	HIST1H2AB	-172	Upstream
chr6:26033952..26033968	-	2.635	4.235	0.909	4.58	0.05	M01368	45201	HIST1H2AB	-172	Upstream
chr6:26033902..26033918	-	0.93	3.62	0.906	4.56	0.031	M00287	NF-Y	HIST1H2AB	-122	Upstream
chr6:26124191..26124201	+	4.031	4.031	1	4.883	0.082	M00464	POU3F2	HIST1H2AC	-181	Upstream
chr6:26124191..26124204	-	1.596	4.623	0.909	4.647	0.076	M00210	OCT-x	HIST1H2AC	-168	Upstream
chr6:26124189..26124205	+	2.526	4.623	0.941	4.849	0.069	M01368	45201	HIST1H2AC	-183	Upstream
chr6:26124189..26124205	+	2.345	4.623	0.937	4.902	0.088	M01476	POU2F3	HIST1H2AC	-183	Upstream
chr6:26124268..26124278	+	3.12	3.976	0.984	4.732	0.067	M00342	45200	HIST1H2AC	-104	Upstream
chr6:26124268..26124279	-	3.144	3.976	0.991	4.609	0.039	M00795	Octamer	HIST1H2AC	-93	Upstream
chr6:26124267..26124280	-	1.815	3.976	0.948	4.971	0.037	M00210	OCT-x	HIST1H2AC	-92	Upstream
chr6:26124265..26124281	+	1.914	3.976	0.929	4.744	0.087	M01368	45201	HIST1H2AC	-107	Upstream
chr6:26124326..26124342	+	0.788	2.656	0.875	4.282	0.045	M00287	NF-Y	HIST1H2AC	-46	Upstream
chr6:26199725..26199732	+	1.683	3.689	1	4.07	0.031	M00644	LBP-1	HIST1H2AD	-254	Upstream
chr6:26199725..26199731	+	1.517	3.584	1	3.93	0.023	M01287	Neuro D	HIST1H2AD	-254	Upstream
chr6:26199725..26199731	-	1.517	3.584	1	3.93	0.023	M01287	Neuro D	HIST1H2AD	-260	Upstream
chr6:26199629..26199642	+	1.177	2.075	0.965	5.108	0.058	M00210	OCT-x	HIST1H2AD	-158	Upstream
chr6:26199628..26199644	-	1.307	2.175	0.982	5.194	0.056	M01368	45201	HIST1H2AD	-173	Upstream
chr6:26216955..26216966	-	1.993	2.791	0.959	4.366	0.074	M00795	Octamer	HIST1H2AE	-181	Upstream
chr6:26216952..26216968	+	1.788	2.984	0.894	4.456	0.095	M01368	45201	HIST1H2AE	-195	Upstream
chr6:27100612..27100623	-	1.318	1.982	0.983	4.544	0.071	M00795	Octamer	HIST1H2AG	-193	Upstream
chr6:27100771..27100779	+	2.419	2.419	1	4.822	0	M00425	E2F	HIST1H2AG	-45	Upstream
chr6:27100771..27100783	-	1.436	2.373	0.936	4.463	0	M00516	E2F	HIST1H2AG	-33	Upstream
chr6:27100771..27100783	+	1.44	2.373	0.969	4.73	0	M00516	E2F	HIST1H2AG	-45	Upstream
chr6:27114674..27114685	-	1.539	2.599	0.959	4.366	0.091	M00795	Octamer	HIST1H2AH	-222	Upstream
chr6:27114673..27114686	-	1.538	2.599	0.901	4.579	0.078	M00210	OCT-x	HIST1H2AH	-221	Upstream
chr6:27114835..27114843	+	2.851	3.015	1	4.822	0	M00425	E2F	HIST1H2AH	-72	Upstream
chr6:27114835..27114847	+	1.735	2.926	0.969	4.73	0	M00516	E2F	HIST1H2AH	-72	Upstream
chr6:27114835..27114847	-	1.731	2.926	0.936	4.463	0	M00516	E2F	HIST1H2AH	-60	Upstream
chr6:27775772..27775779	-	2.13	3.231	1	4.04	0.016	M01709	MAFA	HIST1H2AI	-197	Upstream
chr6:27775900..27775908	+	3.165	3.215	1	4.822	0	M00425	E2F	HIST1H2AI	-76	Upstream
chr6:27775900..27775912	+	1.481	2.703	0.969	4.731	0	M00516	E2F	HIST1H2AI	-76	Upstream
chr6:27782749..27782760	+	2.4	3.146	0.983	4.544	0.054	M00795	Octamer	HIST1H2AJ	-231	Upstream
chr6:27782748..27782761	+	1.459	2.947	0.921	4.741	0.074	M00210	OCT-x	HIST1H2AJ	-230	Upstream
chr6:27782747..27782763	-	1.88	3.831	0.951	5.024	0.083	M01476	POU2F3	HIST1H2AJ	-245	Upstream
chr6:27782747..27782763	-	2.182	3.722	0.966	5.06	0.074	M01368	45201	HIST1H2AJ	-245	Upstream
chr6:27782700..27782708	+	1.732	1.952	1	4.796	0.042	M00039	CREB	HIST1H2AJ	-182	Upstream
chr6:27782700..27782708	-	1.732	1.952	1	4.796	0.042	M00039	CREB	HIST1H2AJ	-190	Upstream
chr6:27782597..27782605	-	2.765	2.815	1	4.822	0	M00425	E2F	HIST1H2AJ	-87	Upstream
chr6:27782593..27782605	-	1.517	2.596	0.969	4.731	0	M00516	E2F	HIST1H2AJ	-87	Upstream
chr6:27806953..27806961	+	2.924	3.87	1	3.516	0.035	M00498	STAT4	HIST1H2AK	-836	Upstream
chr6:27806395..27806402	+	2.818	3.79	1	3.774	0.047	M01207	ETS2	HIST1H2AK	-278	Upstream
chr6:27833044..27833052	+	2.753	3.002	1	4.822	0	M00425	E2F	HIST1H2AL	-62	Upstream
chr6:27833044..27833056	+	1.513	2.237	0.969	4.731	0	M00516	E2F	HIST1H2AL	-62	Upstream
chr6:27861150..27861163	+	1.54	2.645	0.894	4.516	0.077	M00210	OCT-x	HIST1H2AM	-187	Upstream
chr6:27861005..27861013	-	2.86	2.937	1	4.822	0	M00425	E2F	HIST1H2AM	-50	Upstream
chr6:27861001..27861013	-	1.222	2.113	0.969	4.731	0	M00516	E2F	HIST1H2AM	-50	Upstream
chr6:27860995..27861001	+	2.182	3.654	1	3.93	0.012	M01287	Neuro D	HIST1H2AM	-32	Upstream
chr6:27860995..27861001	-	2.182	3.654	1	3.93	0.012	M01287	Neuro D	HIST1H2AM	-38	Upstream
chr6:27860995..27861002	+	2.638	3.654	1	4.07	0.011	M00644	LBP-1	HIST1H2AM	-32	Upstream
chr6:27860994..27861001	-	2.638	3.654	1	4.07	0.011	M00644	LBP-1	HIST1H2AM	-38	Upstream
chr6:25726847..25726858	-	1.826	2.907	0.952	5.102	0.013	M00687	alpha-CP1	HIST1H2BA	-278	Upstream
chr6:25726844..25726860	-	1.236	2.909	0.919	4.679	0.02	M00287	NF-Y	HIST1H2BA	-276	Upstream
chr6:25726857..25726863	-	2.648	3.454	1	3.962	0.032	MA0095	YY1	HIST1H2BA	-273	Upstream
chr6:25726897..25726910	+	1.83	3.017	0.949	4.977	0.035	M00210	OCT-x	HIST1H2BA	-239	Upstream
chr6:25726896..25726912	-	1.661	3.149	0.934	4.793	0.097	M01368	45201	HIST1H2BA	-224	Upstream
chr6:26044567..26044574	-	3.223	3.646	1	3.921	0.023	M01269	NURR1	HIST1H2BB	-689	Upstream
chr6:26044483..26044489	+	2.297	3.602	1	3.93	0.011	M01287	Neuro D	HIST1H2BB	-598	Upstream
chr6:26044483..26044489	-	2.297	3.602	1	3.93	0.011	M01287	Neuro D	HIST1H2BB	-604	Upstream
chr6:26044482..26044489	-	2.763	3.754	1	4.07	0.01	M00644	LBP-1	HIST1H2BB	-604	Upstream
chr6:26044453..26044459	+	3.774	4.036	1	3.962	0.033	MA0095	YY1	HIST1H2BB	-568	Upstream
chr6:26044447..26044455	-	3.203	3.203	1	4.566	0.008	M00698	HEB	HIST1H2BB	-570	Upstream
chr6:26044447..26044453	+	3.805	4.036	1	3.93	0.004	M01287	Neuro D	HIST1H2BB	-562	Upstream
chr6:26044447..26044453	-	3.805	4.036	1	3.93	0.004	M01287	Neuro D	HIST1H2BB	-568	Upstream
chr6:26044446..26044453	-	3.749	4.036	1	4.07	0.006	M00644	LBP-1	HIST1H2BB	-568	Upstream
chr6:26044446..26044455	-	3.792	4.036	1	4.308	0.002	M00927	AP-4	HIST1H2BB	-570	Upstream
chr6:26044444..26044456	+	1.511	2.923	0.994	4.309	0.045	M01288	NeuroD	HIST1H2BB	-559	Upstream
chr6:26044440..26044454	+	0	2.697	0.919	4.271	0.068	M00804	E2A	HIST1H2BB	-555	Upstream
chr6:26044435..26044455	-	0.091	2.701	0.831	4.306	0.025	M01200	CTCF	HIST1H2BB	-570	Upstream
chr6:26044172..26044178	-	2.083	3.985	1	3.663	0	M00704	TEF-1	HIST1H2BB	-293	Upstream
chr6:26044052..26044062	+	2.727	3.607	0.977	4.682	0.098	M00342	45200	HIST1H2BB	-167	Upstream
chr6:26044049..26044065	+	2.13	3.607	0.921	4.678	0.083	M01368	45201	HIST1H2BB	-164	Upstream
chr6:26124326..26124342	+	0.788	2.656	0.875	4.282	0.045	M00287	NF-Y	HIST1H2BC	-194	Upstream
chr6:26124268..26124278	+	3.12	3.976	0.984	4.732	0.067	M00342	45200	HIST1H2BC	-136	Upstream
chr6:26124268..26124279	-	3.144	3.976	0.991	4.609	0.039	M00795	Octamer	HIST1H2BC	-147	Upstream
chr6:26124267..26124280	-	1.815	3.976	0.948	4.971	0.037	M00210	OCT-x	HIST1H2BC	-148	Upstream
chr6:26124265..26124281	+	1.914	3.976	0.929	4.744	0.087	M01368	45201	HIST1H2BC	-133	Upstream
chr6:26124191..26124204	-	1.596	4.623	0.909	4.647	0.076	M00210	OCT-x	HIST1H2BC	-72	Upstream
chr6:26124191..26124201	+	4.031	4.031	1	4.883	0.082	M00464	POU3F2	HIST1H2BC	-59	Upstream
chr6:26124189..26124205	+	2.526	4.623	0.941	4.849	0.069	M01368	45201	HIST1H2BC	-57	Upstream
chr6:26124189..26124205	+	2.345	4.623	0.937	4.902	0.088	M01476	POU2F3	HIST1H2BC	-57	Upstream
chr6:26158118..26158124	+	1.477	3.416	1	3.93	0.024	M01287	Neuro D	HIST1H2BD	-230	Upstream
chr6:26158118..26158124	-	1.477	3.416	1	3.93	0.024	M01287	Neuro D	HIST1H2BD	-224	Upstream
chr6:26158178..26158189	-	1.058	2.196	0.859	4.366	0.08	M00687	alpha-CP1	HIST1H2BD	-159	Upstream
chr6:26158268..26158276	-	3.929	4.739	1	3.907	0.072	M01117	OTX	HIST1H2BD	-72	Upstream
chr6:26183106..26183112	+	1.363	2.142	1	3.663	0	M00704	TEF-1	HIST1H2BE	-917	Upstream
chr6:26183934..26183950	-	1.788	3.288	0.877	4.313	0.094	M01368	45201	HIST1H2BE	-73	Upstream
chr6:26199629..26199642	+	1.177	2.075	0.965	5.108	0.058	M00210	OCT-x	HIST1H2BF	-157	Upstream
chr6:26199628..26199644	-	1.307	2.175	0.982	5.194	0.056	M01368	45201	HIST1H2BF	-142	Upstream
chr6:26199725..26199731	+	1.517	3.584	1	3.93	0.023	M01287	Neuro D	HIST1H2BF	-61	Upstream
chr6:26199725..26199731	-	1.517	3.584	1	3.93	0.023	M01287	Neuro D	HIST1H2BF	-55	Upstream
chr6:26199725..26199732	+	1.683	3.689	1	4.07	0.031	M00644	LBP-1	HIST1H2BF	-61	Upstream
chr6:26216955..26216966	-	1.993	2.791	0.959	4.366	0.074	M00795	Octamer	HIST1H2BG	-94	Upstream
chr6:26216952..26216968	+	1.788	2.984	0.894	4.456	0.095	M01368	45201	HIST1H2BG	-80	Upstream
chr6:26250905..26250921	-	1.065	3.776	0.904	4.541	0.026	M00287	NF-Y	HIST1H2BH	-957	Upstream
chr6:26251791..26251801	-	2.78	3.599	0.977	4.682	0.094	M00342	45200	HIST1H2BH	-77	Upstream
chr6:26251788..26251804	-	1.739	3.47	0.898	4.484	0.094	M01368	45201	HIST1H2BH	-74	Upstream
chr6:26251820..26251826	-	1.862	3.613	1	3.93	0.016	M01287	Neuro D	HIST1H2BH	-52	Upstream
chr6:26251820..26251826	+	1.862	3.613	1	3.93	0.016	M01287	Neuro D	HIST1H2BH	-58	Upstream
chr6:26272522..26272528	-	3.25	3.302	1	3.962	0.029	MA0095	YY1	HIST1H2BI	-675	Upstream
chr6:26272765..26272771	-	1.783	3.009	1	3.663	0	M00704	TEF-1	HIST1H2BI	-432	Upstream
chr6:26273040..26273048	+	1.885	3.073	1	4.195	0	M01153	PXR (PXR:RXR)	HIST1H2BI	-163	Upstream
chr6:26273111..26273122	+	1.566	2.303	0.991	4.609	0.04	M00795	Octamer	HIST1H2BI	-92	Upstream
chr6:26273110..26273123	+	1.65	2.505	0.981	5.242	0.041	M00210	OCT-x	HIST1H2BI	-93	Upstream
chr6:26273109..26273125	-	1.757	2.826	0.962	5.022	0.088	M01368	45201	HIST1H2BI	-78	Upstream
chr6:27100771..27100783	-	1.436	2.373	0.936	4.463	0	M00516	E2F	HIST1H2BJ	-208	Upstream
chr6:27100771..27100783	+	1.44	2.373	0.969	4.73	0	M00516	E2F	HIST1H2BJ	-196	Upstream
chr6:27100771..27100779	+	2.419	2.419	1	4.822	0	M00425	E2F	HIST1H2BJ	-196	Upstream
chr6:27100612..27100623	-	1.318	1.982	0.983	4.544	0.071	M00795	Octamer	HIST1H2BJ	-48	Upstream
chr6:27114835..27114847	+	1.735	2.926	0.969	4.73	0	M00516	E2F	HIST1H2BK	-198	Upstream
chr6:27114835..27114843	+	2.851	3.015	1	4.822	0	M00425	E2F	HIST1H2BK	-198	Upstream
chr6:27114835..27114847	-	1.731	2.926	0.936	4.463	0	M00516	E2F	HIST1H2BK	-210	Upstream
chr6:27114674..27114685	-	1.539	2.599	0.959	4.366	0.091	M00795	Octamer	HIST1H2BK	-48	Upstream
chr6:27114673..27114686	-	1.538	2.599	0.901	4.579	0.078	M00210	OCT-x	HIST1H2BK	-49	Upstream
chr6:27775900..27775912	+	1.481	2.703	0.969	4.731	0	M00516	E2F	HIST1H2BL	-191	Upstream
chr6:27775900..27775908	+	3.165	3.215	1	4.822	0	M00425	E2F	HIST1H2BL	-191	Upstream
chr6:27775772..27775779	-	2.13	3.231	1	4.04	0.016	M01709	MAFA	HIST1H2BL	-70	Upstream
chr6:27782041..27782047	+	1.381	3.037	1	3.93	0.026	M01287	Neuro D	HIST1H2BM	-780	Upstream
chr6:27782041..27782047	-	1.381	3.037	1	3.93	0.026	M01287	Neuro D	HIST1H2BM	-774	Upstream
chr6:27782040..27782047	-	0.998	3.246	1	4.07	0.049	M00644	LBP-1	HIST1H2BM	-774	Upstream
chr6:27782593..27782605	-	1.517	2.596	0.969	4.731	0	M00516	E2F	HIST1H2BM	-216	Upstream
chr6:27782597..27782605	-	2.765	2.815	1	4.822	0	M00425	E2F	HIST1H2BM	-216	Upstream
chr6:27782700..27782708	+	1.732	1.952	1	4.796	0.042	M00039	CREB	HIST1H2BM	-121	Upstream
chr6:27782700..27782708	-	1.732	1.952	1	4.796	0.042	M00039	CREB	HIST1H2BM	-113	Upstream
chr6:27782749..27782760	+	2.4	3.146	0.983	4.544	0.054	M00795	Octamer	HIST1H2BM	-72	Upstream
chr6:27782748..27782761	+	1.459	2.947	0.921	4.741	0.074	M00210	OCT-x	HIST1H2BM	-73	Upstream
chr6:27782747..27782763	-	1.88	3.831	0.951	5.024	0.083	M01476	POU2F3	HIST1H2BM	-58	Upstream
chr6:27805587..27805593	-	1.062	2.069	1	3.663	0	M00704	TEF-1	HIST1H2BN	-846	Upstream
chr6:27806395..27806402	+	2.818	3.79	1	3.774	0.047	M01207	ETS2	HIST1H2BN	-44	Upstream
chr6:27860443..27860451	-	2.647	3.511	1	3.82	0.06	M00921	GR	HIST1H2BO	-751	Upstream
chr6:27860995..27861001	+	2.182	3.654	1	3.93	0.012	M01287	Neuro D	HIST1H2BO	-207	Upstream
chr6:27860995..27861001	-	2.182	3.654	1	3.93	0.012	M01287	Neuro D	HIST1H2BO	-201	Upstream
chr6:27860994..27861001	-	2.638	3.654	1	4.07	0.011	M00644	LBP-1	HIST1H2BO	-201	Upstream
chr6:27860995..27861002	+	2.638	3.654	1	4.07	0.011	M00644	LBP-1	HIST1H2BO	-207	Upstream
chr6:27861001..27861013	-	1.222	2.113	0.969	4.731	0	M00516	E2F	HIST1H2BO	-189	Upstream
chr6:27861005..27861013	-	2.86	2.937	1	4.822	0	M00425	E2F	HIST1H2BO	-189	Upstream
chr6:27861150..27861163	+	1.54	2.645	0.894	4.516	0.077	M00210	OCT-x	HIST1H2BO	-52	Upstream
chr6:26019894..26019900	+	1.729	3.112	1	3.93	0.018	M01287	Neuro D	HIST1H3A	-823	Upstream
chr6:26019894..26019900	-	1.729	3.112	1	3.93	0.018	M01287	Neuro D	HIST1H3A	-817	Upstream
chr6:26020580..26020596	+	0.898	2.953	0.891	4.426	0.037	M00287	NF-Y	HIST1H3A	-137	Upstream
chr6:26032482..26032490	+	2.187	2.187	1	4.796	0.036	M00039	CREB	HIST1H3B	-194	Upstream
chr6:26032482..26032490	-	2.187	2.187	1	4.796	0.036	M00039	CREB	HIST1H3B	-202	Upstream
chr6:26045587..26045594	-	2.784	4.104	1	3.921	0.025	M01269	NURR1	HIST1H3C	-44	Upstream
chr6:26199725..26199732	+	1.683	3.689	1	4.07	0.031	M00644	LBP-1	HIST1H3D	-261	Upstream
chr6:26199725..26199731	+	1.517	3.584	1	3.93	0.023	M01287	Neuro D	HIST1H3D	-261	Upstream
chr6:26199725..26199731	-	1.517	3.584	1	3.93	0.023	M01287	Neuro D	HIST1H3D	-267	Upstream
chr6:26199629..26199642	+	1.177	2.075	0.965	5.108	0.058	M00210	OCT-x	HIST1H3D	-165	Upstream
chr6:26199628..26199644	-	1.307	2.175	0.982	5.194	0.056	M01368	45201	HIST1H3D	-180	Upstream
chr6:26224671..26224677	+	2.325	2.462	1	3.962	0.041	MA0095	YY1	HIST1H3E	-711	Upstream
chr6:26251820..26251826	+	1.862	3.613	1	3.93	0.016	M01287	Neuro D	HIST1H3F	-985	Upstream
chr6:26251820..26251826	-	1.862	3.613	1	3.93	0.016	M01287	Neuro D	HIST1H3F	-991	Upstream
chr6:26251791..26251801	-	2.78	3.599	0.977	4.682	0.094	M00342	45200	HIST1H3F	-966	Upstream
chr6:26251788..26251804	-	1.739	3.47	0.898	4.484	0.094	M01368	45201	HIST1H3F	-969	Upstream
chr6:26250905..26250921	-	1.065	3.776	0.904	4.541	0.026	M00287	NF-Y	HIST1H3F	-86	Upstream
chr6:26272522..26272528	-	3.25	3.302	1	3.962	0.029	MA0095	YY1	HIST1H3G	-916	Upstream
chr6:26271775..26271786	-	0.87	2.275	0.899	4.68	0.071	M00687	alpha-CP1	HIST1H3G	-174	Upstream
chr6:26271690..26271697	+	2.443	3.61	1	3.921	0.032	M01269	NURR1	HIST1H3G	-78	Upstream
chr6:27777241..27777248	+	1.223	1.983	1	3.921	0.063	M01269	NURR1	HIST1H3H	-600	Upstream
chr6:27840924..27840935	+	1.567	1.931	0.927	4.419	0	M01596	GLI3	HIST1H3I	-825	Upstream
chr6:27840923..27840934	-	0.76	2.061	0.92	4.66	0.099	M01704	GLI3	HIST1H3I	-835	Upstream
chr6:27840251..27840257	-	2.533	4.147	1	3.663	0	M00704	TEF-1	HIST1H3I	-158	Upstream
chr6:27858646..27858662	-	0.467	3.159	0.876	4.29	0.078	M00287	NF-Y	HIST1H3J	-92	Upstream
chr6:27858599..27858605	+	2.12	4.168	1	3.93	0.013	M01287	Neuro D	HIST1H3J	-29	Upstream
chr6:27858599..27858605	-	2.12	4.168	1	3.93	0.013	M01287	Neuro D	HIST1H3J	-35	Upstream
chr6:27858598..27858605	-	2.545	4.168	1	4.07	0.012	M00644	LBP-1	HIST1H3J	-35	Upstream
chr6:26021665..26021672	-	1.575	2.526	1	3.921	0.054	M01269	NURR1	HIST1H4A	-234	Upstream
chr6:26027633..26027640	-	2.012	3.485	1	4.001	0.089	M01268	FXR	HIST1H4B	-160	Upstream
chr6:26027487..26027493	+	1.732	3.906	1	3.93	0.018	M01287	Neuro D	HIST1H4B	-7	Upstream
chr6:26027487..26027493	-	1.732	3.906	1	3.93	0.018	M01287	Neuro D	HIST1H4B	-13	Upstream
chr6:26103177..26103184	-	3.006	3.907	1	3.774	0.04	M01207	ETS2	HIST1H4C	-991	Upstream
chr6:26103500..26103507	-	3.054	3.874	1	3.774	0.038	M01207	ETS2	HIST1H4C	-668	Upstream
chr6:26103678..26103686	+	2.338	3.446	1	3.728	0.084	M00500	STAT6	HIST1H4C	-497	Upstream
chr6:26103748..26103755	-	2.333	3.247	1	3.921	0.035	M01269	NURR1	HIST1H4C	-420	Upstream
chr6:26103751..26103757	+	2.341	3.641	1	3.962	0.04	MA0095	YY1	HIST1H4C	-424	Upstream
chr6:26103907..26103913	+	2.748	3.825	1	3.663	0	M00704	TEF-1	HIST1H4C	-268	Upstream
chr6:26104000..26104016	+	0.513	2.301	0.887	4.393	0.076	M00287	NF-Y	HIST1H4C	-175	Upstream
chr6:26190054..26190060	-	1.033	2.131	1	3.663	0	M00704	TEF-1	HIST1H4D	-756	Upstream
chr6:26189576..26189582	+	1.384	2.392	1	3.962	0.076	MA0095	YY1	HIST1H4D	-272	Upstream
chr6:26189501..26189507	+	1.846	3.296	1	3.93	0.016	M01287	Neuro D	HIST1H4D	-197	Upstream
chr6:26189501..26189507	-	1.846	3.296	1	3.93	0.016	M01287	Neuro D	HIST1H4D	-203	Upstream
chr6:26189314..26189320	-	1.735	3.904	1	3.93	0.018	M01287	Neuro D	HIST1H4D	-16	Upstream
chr6:26189314..26189320	+	1.735	3.904	1	3.93	0.018	M01287	Neuro D	HIST1H4D	-10	Upstream
chr6:26240427..26240434	-	3.127	4.044	1	3.774	0.035	M01207	ETS2	HIST1H4F	-219	Upstream
chr6:26286262..26286268	-	1.574	2.666	1	3.962	0.07	MA0095	YY1	HIST1H4H	-541	Upstream
chr6:26285963..26285969	+	1.832	2.87	1	3.663	0	M00704	TEF-1	HIST1H4H	-236	Upstream
chr6:26285954..26285964	+	1.74	3.144	1	3.91	0	M01211	PARP	HIST1H4H	-227	Upstream
chr6:26285885..26285893	+	2.637	2.637	1	4.796	0.035	M00039	CREB	HIST1H4H	-158	Upstream
chr6:26285885..26285893	-	2.637	2.637	1	4.796	0.035	M00039	CREB	HIST1H4H	-166	Upstream
chr6:26285883..26285895	+	2.212	2.73	0.922	4.433	0.095	M00178	CREB	HIST1H4H	-156	Upstream
chr6:26285883..26285895	-	2.216	2.73	0.989	4.966	0.05	M00178	CREB	HIST1H4H	-168	Upstream
chr6:26285882..26285896	-	1.011	1.666	0.94	4.806	0	M00513	ATF3	HIST1H4H	-169	Upstream
chr6:26285882..26285893	+	1.694	2.637	0.934	4.523	0.09	M00917	CREB	HIST1H4H	-155	Upstream
chr6:27107045..27107051	+	2.167	3.476	1	3.962	0.047	MA0095	YY1	HIST1H4I	-42	Upstream
chr6:27842038..27842044	+	1.271	2.37	1	3.93	0.028	M01287	Neuro D	HIST1H4L	-749	Upstream
chr6:27842038..27842044	-	1.271	2.37	1	3.93	0.028	M01287	Neuro D	HIST1H4L	-755	Upstream
chr6:27842031..27842039	-	2.022	2.37	1	3.516	0.069	M00498	STAT4	HIST1H4L	-750	Upstream
chr6:27841929..27841936	-	1.94	2.647	1	3.774	0.074	M01207	ETS2	HIST1H4L	-647	Upstream
chr6:27841909..27841915	-	1.857	2.438	1	3.663	0	M00704	TEF-1	HIST1H4L	-626	Upstream
chr6:27841633..27841639	+	2.013	2.738	1	3.962	0.054	MA0095	YY1	HIST1H4L	-344	Upstream
chr6:27841541..27841547	-	1.961	3.292	1	3.663	0	M00704	TEF-1	HIST1H4L	-258	Upstream
chr6:27841377..27841383	-	2.261	4.037	1	3.93	0.011	M01287	Neuro D	HIST1H4L	-94	Upstream
chr6:27841377..27841384	+	2.32	4.037	1	4.07	0.016	M00644	LBP-1	HIST1H4L	-88	Upstream
chr6:27841377..27841383	+	2.261	4.037	1	3.93	0.011	M01287	Neuro D	HIST1H4L	-88	Upstream
